# Supplementary material for: Precise sample metering method by coordinated burst action of hydrophobic burst valves applied to dried blood spot collection
Source: Royal Society of Chemistry journal article supplement (doi:10.1039/d1lc00422k), 2021-01-01
Supplement: d1lc00422k1.pdf [file d1lc00422k1.pdf]

## Supplementary Information

# Volumetric dried blood spot sampling by coordinated burst action of hydrophobic burst valves

*Dries Vloemans<sup>†1</sup>, Lorenz Van Hileghem<sup>†1</sup>, Wannes Verbist<sup>1</sup>, Debby Thomas<sup>2</sup>, Francesco Dal Dosso<sup>1</sup>,  
and Jeroen Lammertyn<sup>\*1</sup>*

<sup>1</sup>KU Leuven, Department of Biosystems - Biosensors Group, Willem de Croylaan 42, box 2428, 3001 Leuven, Belgium

<sup>2</sup>KU Leuven, Department of Pharmaceutical and Pharmacological Sciences, Herestraat 49, box 424, 3000 Leuven, Belgium

<sup>†</sup>These authors contributed equally to this work

<sup>\*</sup>Corresponding author: jeroen.lammertyn@kuleuven.be; +3216321459

### SI.1: Burst pressure calculation of HBVs and experimental setup

In Figure SI.1a-b, a schematic overview of the theoretical pressure profile with changing meniscus position in the HBV incorporated microfluidic channel is illustrated. A certain baseline pressure ( $P_{c,1}$ ) is required to push the liquid at a constant flow rate through the non-treated channel with a contact angle  $\theta_{c,1}$ . Once liquid-air interface reaches the HBV it stops moving and an additional pressure is required to increase the surface area of the meniscus in order to meet the contact angle properties ( $\theta_{c,2}$ ) of the local hydrophobic region. From the moment the applied pressure ( $P_{c,2}$ ) is high enough so the contact angle of the meniscus meets the one of the hydrophobic coating, the liquid will be pushed through the HBV. Finally, when the meniscus reaches again the non-treated channel surface, the required pressure to maintain the flow rate drops again to its initial value ( $P_{c,1}$ ).

To calculate the burst pressure ( $\Delta P_b$ ) of the HBV, the measured pressure profile was first normalized by the average baseline pressure ( $P_{c,1}$ ). This one was calculated as the average pressure value of the 10 second pressure profile before reaching the HBV. The burst pressure of the HBV was then calculated by taking the average pressure value over the time interval ( $\Delta t = t_2 - t_1$ ) in which the liquid meniscus is moving over the HBV as is indicated in Figure SI.1b.

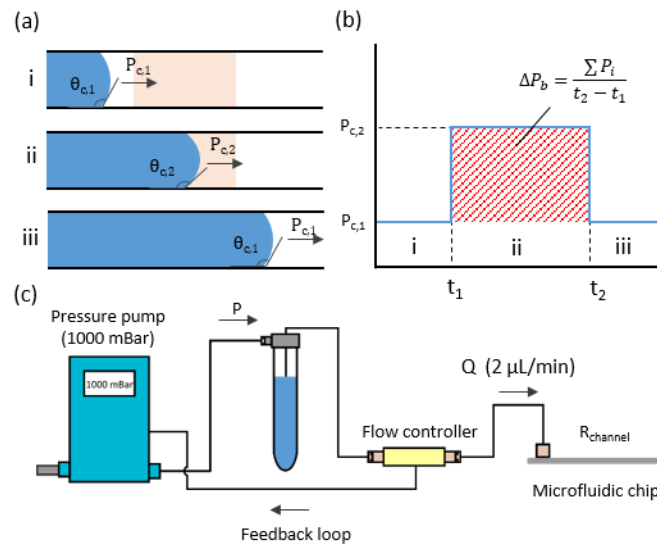

Figure SI.1 (a) Overview of the fluid meniscus position ([i] before, [ii] over, and [iii] after the HBV) within the channel. (b) Theoretical pressure profile to push a fluid front over the HBV. Average burst pressure is calculated as the average normalized pressure difference over the time interval  $t_2 - t_1$ . (c) Schematic representation of the experimental measurement setup.

Liquid was injected in the microfluidic chips using pressure pumps (LINEUP FLOW EZ™ SERIES 1000 mBar, Fluigent, France). The experimental setup is illustrated in Figure SI.1c where a flow controller (Flow unit M, Fluigent, France) is used to control the injection flow rate precisely at 2  $\mu\text{L}/\text{min}$  by controlling the applied pressure via a feedback loop system. The change in applied pressure and effective flow rate are recorded in real-time at a frequency of 0.1 Hz.

### SI.2: Gravimetric methodology for the volumetric performance characterizations

A schematic of the experimental setup and the microfluidic design are illustrated in Figure SI.2a-b. Snapshots of different steps in the gravimetric volume characterization strategy are shown in Figure SI.2c. (i) An initial volume (20  $\mu\text{L}$ ) of citrated blood was preloaded via a prefilling hole in the microfluidic chip. Hereto, an extra hydrophobic barrier was implemented to direct the blood into the desired direction, avoiding it to flow toward the syringe pump connection. (ii) The sample plug was then pushed (15  $\mu\text{L}/\text{min}$ ) through the microfluidic network via a connected syringe pump. (iii) After volume

metering the sample excess was discarded in the waste channel and (iv) finally the isolated metered sample volume was loaded on the circular filter paper. For this experiment, the device worked essentially as a non-integrated DBS system. This way, the filter paper, together with a supporting piece of PVC, can easily be removed from the chip in order to weigh the metered volume before and after sample loading.

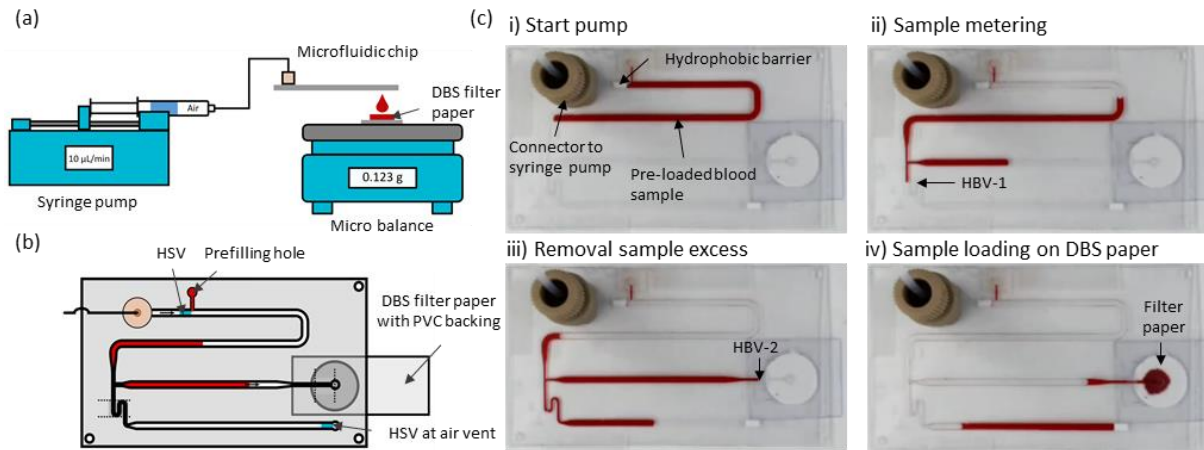

Figure SI.2 (a) Overview of the gravimetric measurement method. (b) Top view of the microfluidic device designed for these measurements. Below the metering outlet, a DBS filter paper is placed on top of a PVC backing for easy handling during weight measurements with the micro balance. (c) Snapshots depicting the working principle of the gravimetric method to assess the accuracy, repeatability and Hct-independency of the metering system.

The accuracy and reproducibility of the gravimetric measurement method was evaluated by measuring the weight difference of paper substrates before and after application of a fixed volume of distilled water using a micropipette. Six repetitions were performed for the volumes of 5, 10 and 15  $\mu\text{L}$ , for which the results are summarized in Figure SI.3. The measurements show a good reproducibility for each evaluated target volume ( $\text{CV} < 4\%$ ). Also, a strong agreement between the measured and target volumes (slope = 1) is observed, which confirms the good accuracy of the measurement method.

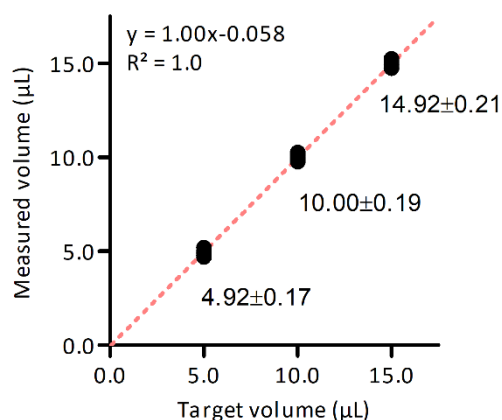

Figure SI.3: Reference gravimetric measurements with distilled water.

### SI.3: Characterization of the burst pressures for different HBV types

Although the performed water contact angle measurements illustrated a good homogeneity of the coated surfaces, these measurements only give an indication of the surface properties on a relatively large scale. The required pressure to push the liquid over the hydrophobic treated zones in the channel

is, however, only determined by the local surface properties of the coating at the meniscus interface of liquid. As a consequence, small artefacts in the coating might have a rather large influence on the burst pressure. It is expected that the local surface homogeneity of the Fluoropel coating is lower compared to the Aquapel solution as the solution contains silica nanoparticles which might cluster together upon evaporation of the solvent and this way introduce local artefacts. This hypotheses is reflected in the calculated differences between the measured and theoretical burst pressures given in Table SI.1. In particular, higher discrepancies can be observed for Fluoropel-based HBVs compared to Aquapel based ones.

Table SI.1: Theoretical and experimental obtained burst pressures for the different HBV types.

|                                                             | Aq sc | Fl sc | Aq dc | Fl + Aq | Fl dc |
|-------------------------------------------------------------|-------|-------|-------|---------|-------|
| $\Delta P_{b, \text{theo}}$ (Pa)                            | 226   | 449   | 453   | 676     | 898   |
| SD                                                          | 29    | 33    | 58    | 62      | 67    |
| $\Delta P_{b, \text{exp}}$ (Pa)                             | 175   | 338   | 369   | 459     | 609   |
| SD                                                          | 26    | 57    | 25    | 37      | 60    |
| $\Delta P_{b, \text{theo}} - \Delta P_{b, \text{exp}}$ (Pa) | 52    | 111   | 83    | 217     | 289   |

Moreover, the performed contact angle measurements do not give any information on the patterning resolution and homogeneity of the coating at the edge of the hydrophobic region. The surface properties at the edge of the coating are, however, crucial in determining the burst pressure of the valve as at this interface the local change in contact angle occurs. In addition to this, due to the manual fabrication of the HBVs it can be expected that for dc HBV valves, the top and bottom coating are not perfectly aligned, what again can have an influence on the overall burst pressure. In general it is believed that by using an automated manufacturing process with a spray coating strategy, a clear reduction in the discrepancy can be achieved.

Another potential explanation for the observed discrepancy is the use of static instead of dynamic contact angles in the calculations of the burst pressure (Eq. (2) main manuscript). The bursting event of the HBV can be seen as a dynamic process in which the meniscus of the liquid has to change its interface to modify its contact angle from the non-treated PVC to meet the properties of the hydrophobic coated region. In general, the dynamic contact angle is smaller compared to the static one, what would result in overall lower burst pressures. The dynamic contact angle might also explain why a larger discrepancy between the theoretical and experimentally measured values was observed for HBVs in which the Fluoropel coatings are used. These coatings have superhydrophobic properties for which the difference between static and dynamic contact angles is almost negligible. As a consequence, the insertion of the dynamic contact angle in Eq. (2) of the main manuscript, only has an effect on the second term in brackets on the right hand side and not the first one, leading to a bigger difference in the burst pressure compared to when both terms are affected.

#### **SI.4: Influence of microchannel dimensions on HBV burst pressure**

According to Eq. (2) in the main text, the burst pressure of the HBV only depends on the height and not the width of the microchannel. This is because the mask-based coating strategy only alters the contact angle properties of the bottom or/and top of the microchannel while the contact angles of the side walls remain unchanged. To confirm this relation, the burst pressures of all five HBV configurations

were also measured in 0.5 and 2.0 mm wide microchannels using the same methodology as described in the Section 2.4 of the Materials and methods. These burst pressures were then compared with the one of the 1.0 mm wide microchannels. A summary of these results is given in Figure SI.4a. Overall, the measured results confirm Eq. (2) as the burst pressures of each HBV configuration are within the same range for the different channel widths (see Tukey multiple comparison statistics in Table SI.2 **Error! Reference source not found.**). However, in case of the dc HBVs a significant increase in burst pressure was observed for the 2.0 mm wide channels compared to the ones with a width of 0.5 and 1.0 mm.

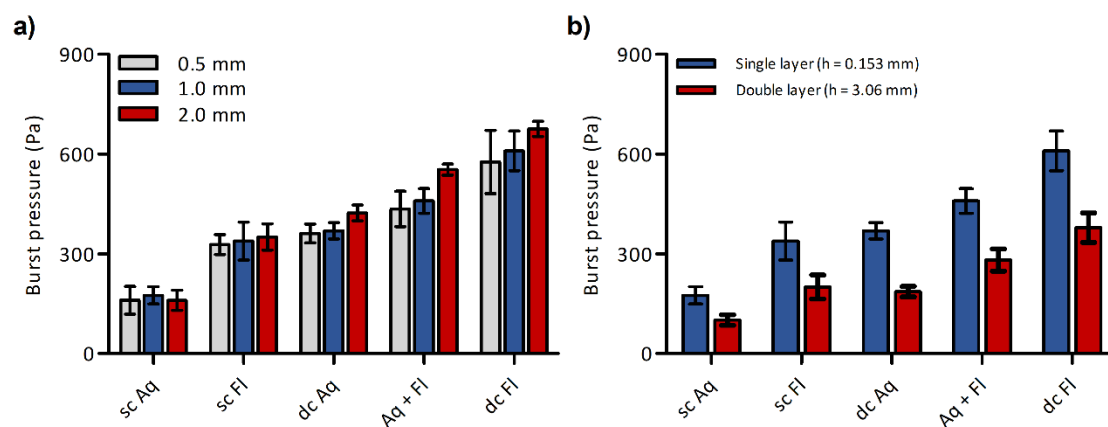

Figure SI.4: Average measured burst pressures of all HBV configurations for a) different channel widths of 0.5, 1.0 and 2.0 mm, and b) different channel heights of 0.153 and 0.306 mm. Error bars in a) and b) represent one standard deviation ( $n \geq 5$ ).

This increase is not problematic in the context of this work as the dimensions of the microchannels, in which the HBVs are located, never exceed a width of 1.0 mm within our system. Moreover, when the trend in burst pressures for all HBV configuration is evaluated, the same 4 HBV configurations (even 5 for the 2.0 mm wide microchannels) show a significantly different burst pressure for each channel width (Table SI.3: Summary of Tukey multiple comparison statistics: overview of significantly different burst pressures between the five HBV configurations for each microchannel width. Table SI.3). As a consequence, we implemented the rule of thumb to use HBVs of the same width within the same microfluidic network.

Apart from the influence of the channel width, also the dependency of the channel height on the burst pressure was studied. Hereto, HBVs were made in microchannels consisting of a double PSA layer (0.306 mm thickness). As illustrated in Figure SI.4b, a clear drop in the measured burst pressure was observed what is in agreement with Eq. (2) of the main manuscript.

Table SI.3: Summary of Tukey multiple comparison statistics: overview of significantly different burst pressures between the evaluated channel widths (0.5, 1.0 and 2.0 mm) for each HBV configuration.

| Sc Aq                                                                                                                                                                                                                                                                                                                                                                                                                                                                                                                                                                                                                                                                                                                                                                                                                                                                                                                                                                                                                                                                                                              |         |               |         | Sc FI                                                            |  |               |                 | Dc Aq                                                            |           |     |             |           |     |   |              |                                                                                                                                                                                                                                                                        |  |  |              |       |  |               |     |   |           |         |   |           |         |         |           |                                                                                                                                                                                                                                                                        |         |         |  |       |        |               |   |         |           |         |   |           |     |         |           |         |   |         |  |         |   |         |   |         |         |   |  |         |         |   |  |         |         |   |  |         |         |   |                                                                                                                                                                                                                                                                                                                                                                                                                                                                                                                                                                                                                                                                                                                                                                                                                                                                                                                                                                                                                                                                                                                       |  |  |  |           |  |  |                 |     |   |   |             |  |  |  |              |  |  |  |              |  |  |  |     |   |         |         |  |   |         |         |  |   |         |         |  |   |         |         |   |         |   |         |  |         |   |         |  |         |   |         |  |         |   |         |   |         |         |   |  |         |         |   |  |         |         |   |  |         |         |   |                                                                                                                                                                                                                                                                                                                                                                                                                                                                                                                                                                                                                                                                                                                                                                                                                                                                                                                                                                                                                                                                                                                      |  |  |  |           |  |  |                 |     |   |   |             |  |  |  |              |  |  |  |              |  |  |  |     |   |         |         |  |   |         |         |  |   |        |         |  |   |         |         |   |         |   |         |  |         |   |         |  |         |   |         |  |         |   |         |   |         |         |   |  |         |         |   |  |         |         |   |  |         |         |   |
|--------------------------------------------------------------------------------------------------------------------------------------------------------------------------------------------------------------------------------------------------------------------------------------------------------------------------------------------------------------------------------------------------------------------------------------------------------------------------------------------------------------------------------------------------------------------------------------------------------------------------------------------------------------------------------------------------------------------------------------------------------------------------------------------------------------------------------------------------------------------------------------------------------------------------------------------------------------------------------------------------------------------------------------------------------------------------------------------------------------------|---------|---------------|---------|------------------------------------------------------------------|--|---------------|-----------------|------------------------------------------------------------------|-----------|-----|-------------|-----------|-----|---|--------------|------------------------------------------------------------------------------------------------------------------------------------------------------------------------------------------------------------------------------------------------------------------------|--|--|--------------|-------|--|---------------|-----|---|-----------|---------|---|-----------|---------|---------|-----------|------------------------------------------------------------------------------------------------------------------------------------------------------------------------------------------------------------------------------------------------------------------------|---------|---------|--|-------|--------|---------------|---|---------|-----------|---------|---|-----------|-----|---------|-----------|---------|---|---------|--|---------|---|---------|---|---------|---------|---|--|---------|---------|---|--|---------|---------|---|--|---------|---------|---|-----------------------------------------------------------------------------------------------------------------------------------------------------------------------------------------------------------------------------------------------------------------------------------------------------------------------------------------------------------------------------------------------------------------------------------------------------------------------------------------------------------------------------------------------------------------------------------------------------------------------------------------------------------------------------------------------------------------------------------------------------------------------------------------------------------------------------------------------------------------------------------------------------------------------------------------------------------------------------------------------------------------------------------------------------------------------------------------------------------------------|--|--|--|-----------|--|--|-----------------|-----|---|---|-------------|--|--|--|--------------|--|--|--|--------------|--|--|--|-----|---|---------|---------|--|---|---------|---------|--|---|---------|---------|--|---|---------|---------|---|---------|---|---------|--|---------|---|---------|--|---------|---|---------|--|---------|---|---------|---|---------|---------|---|--|---------|---------|---|--|---------|---------|---|--|---------|---------|---|----------------------------------------------------------------------------------------------------------------------------------------------------------------------------------------------------------------------------------------------------------------------------------------------------------------------------------------------------------------------------------------------------------------------------------------------------------------------------------------------------------------------------------------------------------------------------------------------------------------------------------------------------------------------------------------------------------------------------------------------------------------------------------------------------------------------------------------------------------------------------------------------------------------------------------------------------------------------------------------------------------------------------------------------------------------------------------------------------------------------|--|--|--|-----------|--|--|-----------------|-----|---|---|-------------|--|--|--|--------------|--|--|--|--------------|--|--|--|-----|---|---------|---------|--|---|---------|---------|--|---|--------|---------|--|---|---------|---------|---|---------|---|---------|--|---------|---|---------|--|---------|---|---------|--|---------|---|---------|---|---------|---------|---|--|---------|---------|---|--|---------|---------|---|--|---------|---------|---|
| LSMeans Differences Tukey HSD                                                                                                                                                                                                                                                                                                                                                                                                                                                                                                                                                                                                                                                                                                                                                                                                                                                                                                                                                                                                                                                                                      |         |               |         | LSMeans Differences Tukey HSD                                    |  |               |                 | LSMeans Differences Tukey HSD                                    |           |     |             |           |     |   |              |                                                                                                                                                                                                                                                                        |  |  |              |       |  |               |     |   |           |         |   |           |         |         |           |                                                                                                                                                                                                                                                                        |         |         |  |       |        |               |   |         |           |         |   |           |     |         |           |         |   |         |  |         |   |         |   |         |         |   |  |         |         |   |  |         |         |   |  |         |         |   |                                                                                                                                                                                                                                                                                                                                                                                                                                                                                                                                                                                                                                                                                                                                                                                                                                                                                                                                                                                                                                                                                                                       |  |  |  |           |  |  |                 |     |   |   |             |  |  |  |              |  |  |  |              |  |  |  |     |   |         |         |  |   |         |         |  |   |         |         |  |   |         |         |   |         |   |         |  |         |   |         |  |         |   |         |  |         |   |         |   |         |         |   |  |         |         |   |  |         |         |   |  |         |         |   |                                                                                                                                                                                                                                                                                                                                                                                                                                                                                                                                                                                                                                                                                                                                                                                                                                                                                                                                                                                                                                                                                                                      |  |  |  |           |  |  |                 |     |   |   |             |  |  |  |              |  |  |  |              |  |  |  |     |   |         |         |  |   |         |         |  |   |        |         |  |   |         |         |   |         |   |         |  |         |   |         |  |         |   |         |  |         |   |         |   |         |         |   |  |         |         |   |  |         |         |   |  |         |         |   |
| α= 0.050 Q= 2.50434                                                                                                                                                                                                                                                                                                                                                                                                                                                                                                                                                                                                                                                                                                                                                                                                                                                                                                                                                                                                                                                                                                |         |               |         | α= 0.050 Q= 2.64044                                              |  |               |                 | α= 0.050 Q= 2.58033                                              |           |     |             |           |     |   |              |                                                                                                                                                                                                                                                                        |  |  |              |       |  |               |     |   |           |         |   |           |         |         |           |                                                                                                                                                                                                                                                                        |         |         |  |       |        |               |   |         |           |         |   |           |     |         |           |         |   |         |  |         |   |         |   |         |         |   |  |         |         |   |  |         |         |   |  |         |         |   |                                                                                                                                                                                                                                                                                                                                                                                                                                                                                                                                                                                                                                                                                                                                                                                                                                                                                                                                                                                                                                                                                                                       |  |  |  |           |  |  |                 |     |   |   |             |  |  |  |              |  |  |  |              |  |  |  |     |   |         |         |  |   |         |         |  |   |         |         |  |   |         |         |   |         |   |         |  |         |   |         |  |         |   |         |  |         |   |         |   |         |         |   |  |         |         |   |  |         |         |   |  |         |         |   |                                                                                                                                                                                                                                                                                                                                                                                                                                                                                                                                                                                                                                                                                                                                                                                                                                                                                                                                                                                                                                                                                                                      |  |  |  |           |  |  |                 |     |   |   |             |  |  |  |              |  |  |  |              |  |  |  |     |   |         |         |  |   |         |         |  |   |        |         |  |   |         |         |   |         |   |         |  |         |   |         |  |         |   |         |  |         |   |         |   |         |         |   |  |         |         |   |  |         |         |   |  |         |         |   |
| <table border="1"> <thead> <tr><th colspan="3">LSMean[j]</th></tr> <tr><th>Mean[j]-Mean[j]</th><th>0.5</th><th>1</th><th>2</th></tr> <tr><th>Std Err Dif</th><td></td><td></td><td></td></tr> <tr><th>Lower CL Dif</th><td></td><td></td><td></td></tr> <tr><th>Upper CL Dif</th><td></td><td></td><td></td></tr> </thead> <tbody> <tr><td>0.5</td><td>0</td><td>-14.464</td><td>0.22397</td></tr> <tr><td></td><td>0</td><td>15.9308</td><td>16.5437</td></tr> <tr><td></td><td>0</td><td>-54.36</td><td>-41.207</td></tr> <tr><td></td><td>0</td><td>25.432</td><td>41.655</td></tr> <tr><td>1</td><td>14.464</td><td>0</td><td>14.688</td></tr> <tr><td></td><td>15.9308</td><td>0</td><td>14.1085</td></tr> <tr><td></td><td>-25.432</td><td>0</td><td>-20.645</td></tr> <tr><td></td><td>54.36</td><td>0</td><td>50.0205</td></tr> <tr><td>2</td><td>-0.224</td><td>-14.688</td><td>0</td></tr> <tr><td></td><td>16.5437</td><td>14.1085</td><td>0</td></tr> <tr><td></td><td>-41.655</td><td>-50.021</td><td>0</td></tr> <tr><td></td><td>41.2071</td><td>20.6445</td><td>0</td></tr> </tbody> </table>      |         |               |         | LSMean[j]                                                        |  |               | Mean[j]-Mean[j] | 0.5                                                              | 1         | 2   | Std Err Dif |           |     |   | Lower CL Dif |                                                                                                                                                                                                                                                                        |  |  | Upper CL Dif |       |  |               | 0.5 | 0 | -14.464   | 0.22397 |   | 0         | 15.9308 | 16.5437 |           | 0                                                                                                                                                                                                                                                                      | -54.36  | -41.207 |  | 0     | 25.432 | 41.655        | 1 | 14.464  | 0         | 14.688  |   | 15.9308   | 0   | 14.1085 |           | -25.432 | 0 | -20.645 |  | 54.36   | 0 | 50.0205 | 2 | -0.224  | -14.688 | 0 |  | 16.5437 | 14.1085 | 0 |  | -41.655 | -50.021 | 0 |  | 41.2071 | 20.6445 | 0 | <table border="1"> <thead> <tr><th colspan="3">LSMean[j]</th></tr> <tr><th>Mean[j]-Mean[j]</th><th>0.5</th><th>1</th><th>2</th></tr> <tr><th>Std Err Dif</th><td></td><td></td><td></td></tr> <tr><th>Lower CL Dif</th><td></td><td></td><td></td></tr> <tr><th>Upper CL Dif</th><td></td><td></td><td></td></tr> </thead> <tbody> <tr><td>0.5</td><td>0</td><td>-10.724</td><td>-22.973</td></tr> <tr><td></td><td>0</td><td>27.2546</td><td>28.4665</td></tr> <tr><td></td><td>0</td><td>-82.688</td><td>-98.137</td></tr> <tr><td></td><td>0</td><td>61.2397</td><td>52.1909</td></tr> <tr><td>1</td><td>10.7242</td><td>0</td><td>-12.249</td></tr> <tr><td></td><td>27.2546</td><td>0</td><td>27.2546</td></tr> <tr><td></td><td>-61.24</td><td>0</td><td>-84.213</td></tr> <tr><td></td><td>82.6882</td><td>0</td><td>59.7152</td></tr> <tr><td>2</td><td>22.9729</td><td>12.2487</td><td>0</td></tr> <tr><td></td><td>28.4665</td><td>27.2546</td><td>0</td></tr> <tr><td></td><td>-52.191</td><td>-59.715</td><td>0</td></tr> <tr><td></td><td>98.1368</td><td>84.2126</td><td>0</td></tr> </tbody> </table>  |  |  |  | LSMean[j] |  |  | Mean[j]-Mean[j] | 0.5 | 1 | 2 | Std Err Dif |  |  |  | Lower CL Dif |  |  |  | Upper CL Dif |  |  |  | 0.5 | 0 | -10.724 | -22.973 |  | 0 | 27.2546 | 28.4665 |  | 0 | -82.688 | -98.137 |  | 0 | 61.2397 | 52.1909 | 1 | 10.7242 | 0 | -12.249 |  | 27.2546 | 0 | 27.2546 |  | -61.24  | 0 | -84.213 |  | 82.6882 | 0 | 59.7152 | 2 | 22.9729 | 12.2487 | 0 |  | 28.4665 | 27.2546 | 0 |  | -52.191 | -59.715 | 0 |  | 98.1368 | 84.2126 | 0 | <table border="1"> <thead> <tr><th colspan="3">LSMean[j]</th></tr> <tr><th>Mean[j]-Mean[j]</th><th>0.5</th><th>1</th><th>2</th></tr> <tr><th>Std Err Dif</th><td></td><td></td><td></td></tr> <tr><th>Lower CL Dif</th><td></td><td></td><td></td></tr> <tr><th>Upper CL Dif</th><td></td><td></td><td></td></tr> </thead> <tbody> <tr><td>0.5</td><td>0</td><td>-7.8864</td><td>-61.381</td></tr> <tr><td></td><td>0</td><td>13.8212</td><td>15.4967</td></tr> <tr><td></td><td>0</td><td>-43.55</td><td>-101.37</td></tr> <tr><td></td><td>0</td><td>27.7769</td><td>-21.395</td></tr> <tr><td>1</td><td>7.88641</td><td>0</td><td>-53.495</td></tr> <tr><td></td><td>13.8212</td><td>0</td><td>14.5896</td></tr> <tr><td></td><td>-27.777</td><td>0</td><td>-91.141</td></tr> <tr><td></td><td>43.5497</td><td>0</td><td>-15.849</td></tr> <tr><td>2</td><td>61.3811</td><td>53.4947</td><td>0</td></tr> <tr><td></td><td>15.4967</td><td>14.5896</td><td>0</td></tr> <tr><td></td><td>21.3946</td><td>15.8486</td><td>0</td></tr> <tr><td></td><td>101.368</td><td>91.1407</td><td>0</td></tr> </tbody> </table> |  |  |  | LSMean[j] |  |  | Mean[j]-Mean[j] | 0.5 | 1 | 2 | Std Err Dif |  |  |  | Lower CL Dif |  |  |  | Upper CL Dif |  |  |  | 0.5 | 0 | -7.8864 | -61.381 |  | 0 | 13.8212 | 15.4967 |  | 0 | -43.55 | -101.37 |  | 0 | 27.7769 | -21.395 | 1 | 7.88641 | 0 | -53.495 |  | 13.8212 | 0 | 14.5896 |  | -27.777 | 0 | -91.141 |  | 43.5497 | 0 | -15.849 | 2 | 61.3811 | 53.4947 | 0 |  | 15.4967 | 14.5896 | 0 |  | 21.3946 | 15.8486 | 0 |  | 101.368 | 91.1407 | 0 |
| LSMean[j]                                                                                                                                                                                                                                                                                                                                                                                                                                                                                                                                                                                                                                                                                                                                                                                                                                                                                                                                                                                                                                                                                                          |         |               |         |                                                                  |  |               |                 |                                                                  |           |     |             |           |     |   |              |                                                                                                                                                                                                                                                                        |  |  |              |       |  |               |     |   |           |         |   |           |         |         |           |                                                                                                                                                                                                                                                                        |         |         |  |       |        |               |   |         |           |         |   |           |     |         |           |         |   |         |  |         |   |         |   |         |         |   |  |         |         |   |  |         |         |   |  |         |         |   |                                                                                                                                                                                                                                                                                                                                                                                                                                                                                                                                                                                                                                                                                                                                                                                                                                                                                                                                                                                                                                                                                                                       |  |  |  |           |  |  |                 |     |   |   |             |  |  |  |              |  |  |  |              |  |  |  |     |   |         |         |  |   |         |         |  |   |         |         |  |   |         |         |   |         |   |         |  |         |   |         |  |         |   |         |  |         |   |         |   |         |         |   |  |         |         |   |  |         |         |   |  |         |         |   |                                                                                                                                                                                                                                                                                                                                                                                                                                                                                                                                                                                                                                                                                                                                                                                                                                                                                                                                                                                                                                                                                                                      |  |  |  |           |  |  |                 |     |   |   |             |  |  |  |              |  |  |  |              |  |  |  |     |   |         |         |  |   |         |         |  |   |        |         |  |   |         |         |   |         |   |         |  |         |   |         |  |         |   |         |  |         |   |         |   |         |         |   |  |         |         |   |  |         |         |   |  |         |         |   |
| Mean[j]-Mean[j]                                                                                                                                                                                                                                                                                                                                                                                                                                                                                                                                                                                                                                                                                                                                                                                                                                                                                                                                                                                                                                                                                                    | 0.5     | 1             | 2       |                                                                  |  |               |                 |                                                                  |           |     |             |           |     |   |              |                                                                                                                                                                                                                                                                        |  |  |              |       |  |               |     |   |           |         |   |           |         |         |           |                                                                                                                                                                                                                                                                        |         |         |  |       |        |               |   |         |           |         |   |           |     |         |           |         |   |         |  |         |   |         |   |         |         |   |  |         |         |   |  |         |         |   |  |         |         |   |                                                                                                                                                                                                                                                                                                                                                                                                                                                                                                                                                                                                                                                                                                                                                                                                                                                                                                                                                                                                                                                                                                                       |  |  |  |           |  |  |                 |     |   |   |             |  |  |  |              |  |  |  |              |  |  |  |     |   |         |         |  |   |         |         |  |   |         |         |  |   |         |         |   |         |   |         |  |         |   |         |  |         |   |         |  |         |   |         |   |         |         |   |  |         |         |   |  |         |         |   |  |         |         |   |                                                                                                                                                                                                                                                                                                                                                                                                                                                                                                                                                                                                                                                                                                                                                                                                                                                                                                                                                                                                                                                                                                                      |  |  |  |           |  |  |                 |     |   |   |             |  |  |  |              |  |  |  |              |  |  |  |     |   |         |         |  |   |         |         |  |   |        |         |  |   |         |         |   |         |   |         |  |         |   |         |  |         |   |         |  |         |   |         |   |         |         |   |  |         |         |   |  |         |         |   |  |         |         |   |
| Std Err Dif                                                                                                                                                                                                                                                                                                                                                                                                                                                                                                                                                                                                                                                                                                                                                                                                                                                                                                                                                                                                                                                                                                        |         |               |         |                                                                  |  |               |                 |                                                                  |           |     |             |           |     |   |              |                                                                                                                                                                                                                                                                        |  |  |              |       |  |               |     |   |           |         |   |           |         |         |           |                                                                                                                                                                                                                                                                        |         |         |  |       |        |               |   |         |           |         |   |           |     |         |           |         |   |         |  |         |   |         |   |         |         |   |  |         |         |   |  |         |         |   |  |         |         |   |                                                                                                                                                                                                                                                                                                                                                                                                                                                                                                                                                                                                                                                                                                                                                                                                                                                                                                                                                                                                                                                                                                                       |  |  |  |           |  |  |                 |     |   |   |             |  |  |  |              |  |  |  |              |  |  |  |     |   |         |         |  |   |         |         |  |   |         |         |  |   |         |         |   |         |   |         |  |         |   |         |  |         |   |         |  |         |   |         |   |         |         |   |  |         |         |   |  |         |         |   |  |         |         |   |                                                                                                                                                                                                                                                                                                                                                                                                                                                                                                                                                                                                                                                                                                                                                                                                                                                                                                                                                                                                                                                                                                                      |  |  |  |           |  |  |                 |     |   |   |             |  |  |  |              |  |  |  |              |  |  |  |     |   |         |         |  |   |         |         |  |   |        |         |  |   |         |         |   |         |   |         |  |         |   |         |  |         |   |         |  |         |   |         |   |         |         |   |  |         |         |   |  |         |         |   |  |         |         |   |
| Lower CL Dif                                                                                                                                                                                                                                                                                                                                                                                                                                                                                                                                                                                                                                                                                                                                                                                                                                                                                                                                                                                                                                                                                                       |         |               |         |                                                                  |  |               |                 |                                                                  |           |     |             |           |     |   |              |                                                                                                                                                                                                                                                                        |  |  |              |       |  |               |     |   |           |         |   |           |         |         |           |                                                                                                                                                                                                                                                                        |         |         |  |       |        |               |   |         |           |         |   |           |     |         |           |         |   |         |  |         |   |         |   |         |         |   |  |         |         |   |  |         |         |   |  |         |         |   |                                                                                                                                                                                                                                                                                                                                                                                                                                                                                                                                                                                                                                                                                                                                                                                                                                                                                                                                                                                                                                                                                                                       |  |  |  |           |  |  |                 |     |   |   |             |  |  |  |              |  |  |  |              |  |  |  |     |   |         |         |  |   |         |         |  |   |         |         |  |   |         |         |   |         |   |         |  |         |   |         |  |         |   |         |  |         |   |         |   |         |         |   |  |         |         |   |  |         |         |   |  |         |         |   |                                                                                                                                                                                                                                                                                                                                                                                                                                                                                                                                                                                                                                                                                                                                                                                                                                                                                                                                                                                                                                                                                                                      |  |  |  |           |  |  |                 |     |   |   |             |  |  |  |              |  |  |  |              |  |  |  |     |   |         |         |  |   |         |         |  |   |        |         |  |   |         |         |   |         |   |         |  |         |   |         |  |         |   |         |  |         |   |         |   |         |         |   |  |         |         |   |  |         |         |   |  |         |         |   |
| Upper CL Dif                                                                                                                                                                                                                                                                                                                                                                                                                                                                                                                                                                                                                                                                                                                                                                                                                                                                                                                                                                                                                                                                                                       |         |               |         |                                                                  |  |               |                 |                                                                  |           |     |             |           |     |   |              |                                                                                                                                                                                                                                                                        |  |  |              |       |  |               |     |   |           |         |   |           |         |         |           |                                                                                                                                                                                                                                                                        |         |         |  |       |        |               |   |         |           |         |   |           |     |         |           |         |   |         |  |         |   |         |   |         |         |   |  |         |         |   |  |         |         |   |  |         |         |   |                                                                                                                                                                                                                                                                                                                                                                                                                                                                                                                                                                                                                                                                                                                                                                                                                                                                                                                                                                                                                                                                                                                       |  |  |  |           |  |  |                 |     |   |   |             |  |  |  |              |  |  |  |              |  |  |  |     |   |         |         |  |   |         |         |  |   |         |         |  |   |         |         |   |         |   |         |  |         |   |         |  |         |   |         |  |         |   |         |   |         |         |   |  |         |         |   |  |         |         |   |  |         |         |   |                                                                                                                                                                                                                                                                                                                                                                                                                                                                                                                                                                                                                                                                                                                                                                                                                                                                                                                                                                                                                                                                                                                      |  |  |  |           |  |  |                 |     |   |   |             |  |  |  |              |  |  |  |              |  |  |  |     |   |         |         |  |   |         |         |  |   |        |         |  |   |         |         |   |         |   |         |  |         |   |         |  |         |   |         |  |         |   |         |   |         |         |   |  |         |         |   |  |         |         |   |  |         |         |   |
| 0.5                                                                                                                                                                                                                                                                                                                                                                                                                                                                                                                                                                                                                                                                                                                                                                                                                                                                                                                                                                                                                                                                                                                | 0       | -14.464       | 0.22397 |                                                                  |  |               |                 |                                                                  |           |     |             |           |     |   |              |                                                                                                                                                                                                                                                                        |  |  |              |       |  |               |     |   |           |         |   |           |         |         |           |                                                                                                                                                                                                                                                                        |         |         |  |       |        |               |   |         |           |         |   |           |     |         |           |         |   |         |  |         |   |         |   |         |         |   |  |         |         |   |  |         |         |   |  |         |         |   |                                                                                                                                                                                                                                                                                                                                                                                                                                                                                                                                                                                                                                                                                                                                                                                                                                                                                                                                                                                                                                                                                                                       |  |  |  |           |  |  |                 |     |   |   |             |  |  |  |              |  |  |  |              |  |  |  |     |   |         |         |  |   |         |         |  |   |         |         |  |   |         |         |   |         |   |         |  |         |   |         |  |         |   |         |  |         |   |         |   |         |         |   |  |         |         |   |  |         |         |   |  |         |         |   |                                                                                                                                                                                                                                                                                                                                                                                                                                                                                                                                                                                                                                                                                                                                                                                                                                                                                                                                                                                                                                                                                                                      |  |  |  |           |  |  |                 |     |   |   |             |  |  |  |              |  |  |  |              |  |  |  |     |   |         |         |  |   |         |         |  |   |        |         |  |   |         |         |   |         |   |         |  |         |   |         |  |         |   |         |  |         |   |         |   |         |         |   |  |         |         |   |  |         |         |   |  |         |         |   |
|                                                                                                                                                                                                                                                                                                                                                                                                                                                                                                                                                                                                                                                                                                                                                                                                                                                                                                                                                                                                                                                                                                                    | 0       | 15.9308       | 16.5437 |                                                                  |  |               |                 |                                                                  |           |     |             |           |     |   |              |                                                                                                                                                                                                                                                                        |  |  |              |       |  |               |     |   |           |         |   |           |         |         |           |                                                                                                                                                                                                                                                                        |         |         |  |       |        |               |   |         |           |         |   |           |     |         |           |         |   |         |  |         |   |         |   |         |         |   |  |         |         |   |  |         |         |   |  |         |         |   |                                                                                                                                                                                                                                                                                                                                                                                                                                                                                                                                                                                                                                                                                                                                                                                                                                                                                                                                                                                                                                                                                                                       |  |  |  |           |  |  |                 |     |   |   |             |  |  |  |              |  |  |  |              |  |  |  |     |   |         |         |  |   |         |         |  |   |         |         |  |   |         |         |   |         |   |         |  |         |   |         |  |         |   |         |  |         |   |         |   |         |         |   |  |         |         |   |  |         |         |   |  |         |         |   |                                                                                                                                                                                                                                                                                                                                                                                                                                                                                                                                                                                                                                                                                                                                                                                                                                                                                                                                                                                                                                                                                                                      |  |  |  |           |  |  |                 |     |   |   |             |  |  |  |              |  |  |  |              |  |  |  |     |   |         |         |  |   |         |         |  |   |        |         |  |   |         |         |   |         |   |         |  |         |   |         |  |         |   |         |  |         |   |         |   |         |         |   |  |         |         |   |  |         |         |   |  |         |         |   |
|                                                                                                                                                                                                                                                                                                                                                                                                                                                                                                                                                                                                                                                                                                                                                                                                                                                                                                                                                                                                                                                                                                                    | 0       | -54.36        | -41.207 |                                                                  |  |               |                 |                                                                  |           |     |             |           |     |   |              |                                                                                                                                                                                                                                                                        |  |  |              |       |  |               |     |   |           |         |   |           |         |         |           |                                                                                                                                                                                                                                                                        |         |         |  |       |        |               |   |         |           |         |   |           |     |         |           |         |   |         |  |         |   |         |   |         |         |   |  |         |         |   |  |         |         |   |  |         |         |   |                                                                                                                                                                                                                                                                                                                                                                                                                                                                                                                                                                                                                                                                                                                                                                                                                                                                                                                                                                                                                                                                                                                       |  |  |  |           |  |  |                 |     |   |   |             |  |  |  |              |  |  |  |              |  |  |  |     |   |         |         |  |   |         |         |  |   |         |         |  |   |         |         |   |         |   |         |  |         |   |         |  |         |   |         |  |         |   |         |   |         |         |   |  |         |         |   |  |         |         |   |  |         |         |   |                                                                                                                                                                                                                                                                                                                                                                                                                                                                                                                                                                                                                                                                                                                                                                                                                                                                                                                                                                                                                                                                                                                      |  |  |  |           |  |  |                 |     |   |   |             |  |  |  |              |  |  |  |              |  |  |  |     |   |         |         |  |   |         |         |  |   |        |         |  |   |         |         |   |         |   |         |  |         |   |         |  |         |   |         |  |         |   |         |   |         |         |   |  |         |         |   |  |         |         |   |  |         |         |   |
|                                                                                                                                                                                                                                                                                                                                                                                                                                                                                                                                                                                                                                                                                                                                                                                                                                                                                                                                                                                                                                                                                                                    | 0       | 25.432        | 41.655  |                                                                  |  |               |                 |                                                                  |           |     |             |           |     |   |              |                                                                                                                                                                                                                                                                        |  |  |              |       |  |               |     |   |           |         |   |           |         |         |           |                                                                                                                                                                                                                                                                        |         |         |  |       |        |               |   |         |           |         |   |           |     |         |           |         |   |         |  |         |   |         |   |         |         |   |  |         |         |   |  |         |         |   |  |         |         |   |                                                                                                                                                                                                                                                                                                                                                                                                                                                                                                                                                                                                                                                                                                                                                                                                                                                                                                                                                                                                                                                                                                                       |  |  |  |           |  |  |                 |     |   |   |             |  |  |  |              |  |  |  |              |  |  |  |     |   |         |         |  |   |         |         |  |   |         |         |  |   |         |         |   |         |   |         |  |         |   |         |  |         |   |         |  |         |   |         |   |         |         |   |  |         |         |   |  |         |         |   |  |         |         |   |                                                                                                                                                                                                                                                                                                                                                                                                                                                                                                                                                                                                                                                                                                                                                                                                                                                                                                                                                                                                                                                                                                                      |  |  |  |           |  |  |                 |     |   |   |             |  |  |  |              |  |  |  |              |  |  |  |     |   |         |         |  |   |         |         |  |   |        |         |  |   |         |         |   |         |   |         |  |         |   |         |  |         |   |         |  |         |   |         |   |         |         |   |  |         |         |   |  |         |         |   |  |         |         |   |
| 1                                                                                                                                                                                                                                                                                                                                                                                                                                                                                                                                                                                                                                                                                                                                                                                                                                                                                                                                                                                                                                                                                                                  | 14.464  | 0             | 14.688  |                                                                  |  |               |                 |                                                                  |           |     |             |           |     |   |              |                                                                                                                                                                                                                                                                        |  |  |              |       |  |               |     |   |           |         |   |           |         |         |           |                                                                                                                                                                                                                                                                        |         |         |  |       |        |               |   |         |           |         |   |           |     |         |           |         |   |         |  |         |   |         |   |         |         |   |  |         |         |   |  |         |         |   |  |         |         |   |                                                                                                                                                                                                                                                                                                                                                                                                                                                                                                                                                                                                                                                                                                                                                                                                                                                                                                                                                                                                                                                                                                                       |  |  |  |           |  |  |                 |     |   |   |             |  |  |  |              |  |  |  |              |  |  |  |     |   |         |         |  |   |         |         |  |   |         |         |  |   |         |         |   |         |   |         |  |         |   |         |  |         |   |         |  |         |   |         |   |         |         |   |  |         |         |   |  |         |         |   |  |         |         |   |                                                                                                                                                                                                                                                                                                                                                                                                                                                                                                                                                                                                                                                                                                                                                                                                                                                                                                                                                                                                                                                                                                                      |  |  |  |           |  |  |                 |     |   |   |             |  |  |  |              |  |  |  |              |  |  |  |     |   |         |         |  |   |         |         |  |   |        |         |  |   |         |         |   |         |   |         |  |         |   |         |  |         |   |         |  |         |   |         |   |         |         |   |  |         |         |   |  |         |         |   |  |         |         |   |
|                                                                                                                                                                                                                                                                                                                                                                                                                                                                                                                                                                                                                                                                                                                                                                                                                                                                                                                                                                                                                                                                                                                    | 15.9308 | 0             | 14.1085 |                                                                  |  |               |                 |                                                                  |           |     |             |           |     |   |              |                                                                                                                                                                                                                                                                        |  |  |              |       |  |               |     |   |           |         |   |           |         |         |           |                                                                                                                                                                                                                                                                        |         |         |  |       |        |               |   |         |           |         |   |           |     |         |           |         |   |         |  |         |   |         |   |         |         |   |  |         |         |   |  |         |         |   |  |         |         |   |                                                                                                                                                                                                                                                                                                                                                                                                                                                                                                                                                                                                                                                                                                                                                                                                                                                                                                                                                                                                                                                                                                                       |  |  |  |           |  |  |                 |     |   |   |             |  |  |  |              |  |  |  |              |  |  |  |     |   |         |         |  |   |         |         |  |   |         |         |  |   |         |         |   |         |   |         |  |         |   |         |  |         |   |         |  |         |   |         |   |         |         |   |  |         |         |   |  |         |         |   |  |         |         |   |                                                                                                                                                                                                                                                                                                                                                                                                                                                                                                                                                                                                                                                                                                                                                                                                                                                                                                                                                                                                                                                                                                                      |  |  |  |           |  |  |                 |     |   |   |             |  |  |  |              |  |  |  |              |  |  |  |     |   |         |         |  |   |         |         |  |   |        |         |  |   |         |         |   |         |   |         |  |         |   |         |  |         |   |         |  |         |   |         |   |         |         |   |  |         |         |   |  |         |         |   |  |         |         |   |
|                                                                                                                                                                                                                                                                                                                                                                                                                                                                                                                                                                                                                                                                                                                                                                                                                                                                                                                                                                                                                                                                                                                    | -25.432 | 0             | -20.645 |                                                                  |  |               |                 |                                                                  |           |     |             |           |     |   |              |                                                                                                                                                                                                                                                                        |  |  |              |       |  |               |     |   |           |         |   |           |         |         |           |                                                                                                                                                                                                                                                                        |         |         |  |       |        |               |   |         |           |         |   |           |     |         |           |         |   |         |  |         |   |         |   |         |         |   |  |         |         |   |  |         |         |   |  |         |         |   |                                                                                                                                                                                                                                                                                                                                                                                                                                                                                                                                                                                                                                                                                                                                                                                                                                                                                                                                                                                                                                                                                                                       |  |  |  |           |  |  |                 |     |   |   |             |  |  |  |              |  |  |  |              |  |  |  |     |   |         |         |  |   |         |         |  |   |         |         |  |   |         |         |   |         |   |         |  |         |   |         |  |         |   |         |  |         |   |         |   |         |         |   |  |         |         |   |  |         |         |   |  |         |         |   |                                                                                                                                                                                                                                                                                                                                                                                                                                                                                                                                                                                                                                                                                                                                                                                                                                                                                                                                                                                                                                                                                                                      |  |  |  |           |  |  |                 |     |   |   |             |  |  |  |              |  |  |  |              |  |  |  |     |   |         |         |  |   |         |         |  |   |        |         |  |   |         |         |   |         |   |         |  |         |   |         |  |         |   |         |  |         |   |         |   |         |         |   |  |         |         |   |  |         |         |   |  |         |         |   |
|                                                                                                                                                                                                                                                                                                                                                                                                                                                                                                                                                                                                                                                                                                                                                                                                                                                                                                                                                                                                                                                                                                                    | 54.36   | 0             | 50.0205 |                                                                  |  |               |                 |                                                                  |           |     |             |           |     |   |              |                                                                                                                                                                                                                                                                        |  |  |              |       |  |               |     |   |           |         |   |           |         |         |           |                                                                                                                                                                                                                                                                        |         |         |  |       |        |               |   |         |           |         |   |           |     |         |           |         |   |         |  |         |   |         |   |         |         |   |  |         |         |   |  |         |         |   |  |         |         |   |                                                                                                                                                                                                                                                                                                                                                                                                                                                                                                                                                                                                                                                                                                                                                                                                                                                                                                                                                                                                                                                                                                                       |  |  |  |           |  |  |                 |     |   |   |             |  |  |  |              |  |  |  |              |  |  |  |     |   |         |         |  |   |         |         |  |   |         |         |  |   |         |         |   |         |   |         |  |         |   |         |  |         |   |         |  |         |   |         |   |         |         |   |  |         |         |   |  |         |         |   |  |         |         |   |                                                                                                                                                                                                                                                                                                                                                                                                                                                                                                                                                                                                                                                                                                                                                                                                                                                                                                                                                                                                                                                                                                                      |  |  |  |           |  |  |                 |     |   |   |             |  |  |  |              |  |  |  |              |  |  |  |     |   |         |         |  |   |         |         |  |   |        |         |  |   |         |         |   |         |   |         |  |         |   |         |  |         |   |         |  |         |   |         |   |         |         |   |  |         |         |   |  |         |         |   |  |         |         |   |
| 2                                                                                                                                                                                                                                                                                                                                                                                                                                                                                                                                                                                                                                                                                                                                                                                                                                                                                                                                                                                                                                                                                                                  | -0.224  | -14.688       | 0       |                                                                  |  |               |                 |                                                                  |           |     |             |           |     |   |              |                                                                                                                                                                                                                                                                        |  |  |              |       |  |               |     |   |           |         |   |           |         |         |           |                                                                                                                                                                                                                                                                        |         |         |  |       |        |               |   |         |           |         |   |           |     |         |           |         |   |         |  |         |   |         |   |         |         |   |  |         |         |   |  |         |         |   |  |         |         |   |                                                                                                                                                                                                                                                                                                                                                                                                                                                                                                                                                                                                                                                                                                                                                                                                                                                                                                                                                                                                                                                                                                                       |  |  |  |           |  |  |                 |     |   |   |             |  |  |  |              |  |  |  |              |  |  |  |     |   |         |         |  |   |         |         |  |   |         |         |  |   |         |         |   |         |   |         |  |         |   |         |  |         |   |         |  |         |   |         |   |         |         |   |  |         |         |   |  |         |         |   |  |         |         |   |                                                                                                                                                                                                                                                                                                                                                                                                                                                                                                                                                                                                                                                                                                                                                                                                                                                                                                                                                                                                                                                                                                                      |  |  |  |           |  |  |                 |     |   |   |             |  |  |  |              |  |  |  |              |  |  |  |     |   |         |         |  |   |         |         |  |   |        |         |  |   |         |         |   |         |   |         |  |         |   |         |  |         |   |         |  |         |   |         |   |         |         |   |  |         |         |   |  |         |         |   |  |         |         |   |
|                                                                                                                                                                                                                                                                                                                                                                                                                                                                                                                                                                                                                                                                                                                                                                                                                                                                                                                                                                                                                                                                                                                    | 16.5437 | 14.1085       | 0       |                                                                  |  |               |                 |                                                                  |           |     |             |           |     |   |              |                                                                                                                                                                                                                                                                        |  |  |              |       |  |               |     |   |           |         |   |           |         |         |           |                                                                                                                                                                                                                                                                        |         |         |  |       |        |               |   |         |           |         |   |           |     |         |           |         |   |         |  |         |   |         |   |         |         |   |  |         |         |   |  |         |         |   |  |         |         |   |                                                                                                                                                                                                                                                                                                                                                                                                                                                                                                                                                                                                                                                                                                                                                                                                                                                                                                                                                                                                                                                                                                                       |  |  |  |           |  |  |                 |     |   |   |             |  |  |  |              |  |  |  |              |  |  |  |     |   |         |         |  |   |         |         |  |   |         |         |  |   |         |         |   |         |   |         |  |         |   |         |  |         |   |         |  |         |   |         |   |         |         |   |  |         |         |   |  |         |         |   |  |         |         |   |                                                                                                                                                                                                                                                                                                                                                                                                                                                                                                                                                                                                                                                                                                                                                                                                                                                                                                                                                                                                                                                                                                                      |  |  |  |           |  |  |                 |     |   |   |             |  |  |  |              |  |  |  |              |  |  |  |     |   |         |         |  |   |         |         |  |   |        |         |  |   |         |         |   |         |   |         |  |         |   |         |  |         |   |         |  |         |   |         |   |         |         |   |  |         |         |   |  |         |         |   |  |         |         |   |
|                                                                                                                                                                                                                                                                                                                                                                                                                                                                                                                                                                                                                                                                                                                                                                                                                                                                                                                                                                                                                                                                                                                    | -41.655 | -50.021       | 0       |                                                                  |  |               |                 |                                                                  |           |     |             |           |     |   |              |                                                                                                                                                                                                                                                                        |  |  |              |       |  |               |     |   |           |         |   |           |         |         |           |                                                                                                                                                                                                                                                                        |         |         |  |       |        |               |   |         |           |         |   |           |     |         |           |         |   |         |  |         |   |         |   |         |         |   |  |         |         |   |  |         |         |   |  |         |         |   |                                                                                                                                                                                                                                                                                                                                                                                                                                                                                                                                                                                                                                                                                                                                                                                                                                                                                                                                                                                                                                                                                                                       |  |  |  |           |  |  |                 |     |   |   |             |  |  |  |              |  |  |  |              |  |  |  |     |   |         |         |  |   |         |         |  |   |         |         |  |   |         |         |   |         |   |         |  |         |   |         |  |         |   |         |  |         |   |         |   |         |         |   |  |         |         |   |  |         |         |   |  |         |         |   |                                                                                                                                                                                                                                                                                                                                                                                                                                                                                                                                                                                                                                                                                                                                                                                                                                                                                                                                                                                                                                                                                                                      |  |  |  |           |  |  |                 |     |   |   |             |  |  |  |              |  |  |  |              |  |  |  |     |   |         |         |  |   |         |         |  |   |        |         |  |   |         |         |   |         |   |         |  |         |   |         |  |         |   |         |  |         |   |         |   |         |         |   |  |         |         |   |  |         |         |   |  |         |         |   |
|                                                                                                                                                                                                                                                                                                                                                                                                                                                                                                                                                                                                                                                                                                                                                                                                                                                                                                                                                                                                                                                                                                                    | 41.2071 | 20.6445       | 0       |                                                                  |  |               |                 |                                                                  |           |     |             |           |     |   |              |                                                                                                                                                                                                                                                                        |  |  |              |       |  |               |     |   |           |         |   |           |         |         |           |                                                                                                                                                                                                                                                                        |         |         |  |       |        |               |   |         |           |         |   |           |     |         |           |         |   |         |  |         |   |         |   |         |         |   |  |         |         |   |  |         |         |   |  |         |         |   |                                                                                                                                                                                                                                                                                                                                                                                                                                                                                                                                                                                                                                                                                                                                                                                                                                                                                                                                                                                                                                                                                                                       |  |  |  |           |  |  |                 |     |   |   |             |  |  |  |              |  |  |  |              |  |  |  |     |   |         |         |  |   |         |         |  |   |         |         |  |   |         |         |   |         |   |         |  |         |   |         |  |         |   |         |  |         |   |         |   |         |         |   |  |         |         |   |  |         |         |   |  |         |         |   |                                                                                                                                                                                                                                                                                                                                                                                                                                                                                                                                                                                                                                                                                                                                                                                                                                                                                                                                                                                                                                                                                                                      |  |  |  |           |  |  |                 |     |   |   |             |  |  |  |              |  |  |  |              |  |  |  |     |   |         |         |  |   |         |         |  |   |        |         |  |   |         |         |   |         |   |         |  |         |   |         |  |         |   |         |  |         |   |         |   |         |         |   |  |         |         |   |  |         |         |   |  |         |         |   |
| LSMean[j]                                                                                                                                                                                                                                                                                                                                                                                                                                                                                                                                                                                                                                                                                                                                                                                                                                                                                                                                                                                                                                                                                                          |         |               |         |                                                                  |  |               |                 |                                                                  |           |     |             |           |     |   |              |                                                                                                                                                                                                                                                                        |  |  |              |       |  |               |     |   |           |         |   |           |         |         |           |                                                                                                                                                                                                                                                                        |         |         |  |       |        |               |   |         |           |         |   |           |     |         |           |         |   |         |  |         |   |         |   |         |         |   |  |         |         |   |  |         |         |   |  |         |         |   |                                                                                                                                                                                                                                                                                                                                                                                                                                                                                                                                                                                                                                                                                                                                                                                                                                                                                                                                                                                                                                                                                                                       |  |  |  |           |  |  |                 |     |   |   |             |  |  |  |              |  |  |  |              |  |  |  |     |   |         |         |  |   |         |         |  |   |         |         |  |   |         |         |   |         |   |         |  |         |   |         |  |         |   |         |  |         |   |         |   |         |         |   |  |         |         |   |  |         |         |   |  |         |         |   |                                                                                                                                                                                                                                                                                                                                                                                                                                                                                                                                                                                                                                                                                                                                                                                                                                                                                                                                                                                                                                                                                                                      |  |  |  |           |  |  |                 |     |   |   |             |  |  |  |              |  |  |  |              |  |  |  |     |   |         |         |  |   |         |         |  |   |        |         |  |   |         |         |   |         |   |         |  |         |   |         |  |         |   |         |  |         |   |         |   |         |         |   |  |         |         |   |  |         |         |   |  |         |         |   |
| Mean[j]-Mean[j]                                                                                                                                                                                                                                                                                                                                                                                                                                                                                                                                                                                                                                                                                                                                                                                                                                                                                                                                                                                                                                                                                                    | 0.5     | 1             | 2       |                                                                  |  |               |                 |                                                                  |           |     |             |           |     |   |              |                                                                                                                                                                                                                                                                        |  |  |              |       |  |               |     |   |           |         |   |           |         |         |           |                                                                                                                                                                                                                                                                        |         |         |  |       |        |               |   |         |           |         |   |           |     |         |           |         |   |         |  |         |   |         |   |         |         |   |  |         |         |   |  |         |         |   |  |         |         |   |                                                                                                                                                                                                                                                                                                                                                                                                                                                                                                                                                                                                                                                                                                                                                                                                                                                                                                                                                                                                                                                                                                                       |  |  |  |           |  |  |                 |     |   |   |             |  |  |  |              |  |  |  |              |  |  |  |     |   |         |         |  |   |         |         |  |   |         |         |  |   |         |         |   |         |   |         |  |         |   |         |  |         |   |         |  |         |   |         |   |         |         |   |  |         |         |   |  |         |         |   |  |         |         |   |                                                                                                                                                                                                                                                                                                                                                                                                                                                                                                                                                                                                                                                                                                                                                                                                                                                                                                                                                                                                                                                                                                                      |  |  |  |           |  |  |                 |     |   |   |             |  |  |  |              |  |  |  |              |  |  |  |     |   |         |         |  |   |         |         |  |   |        |         |  |   |         |         |   |         |   |         |  |         |   |         |  |         |   |         |  |         |   |         |   |         |         |   |  |         |         |   |  |         |         |   |  |         |         |   |
| Std Err Dif                                                                                                                                                                                                                                                                                                                                                                                                                                                                                                                                                                                                                                                                                                                                                                                                                                                                                                                                                                                                                                                                                                        |         |               |         |                                                                  |  |               |                 |                                                                  |           |     |             |           |     |   |              |                                                                                                                                                                                                                                                                        |  |  |              |       |  |               |     |   |           |         |   |           |         |         |           |                                                                                                                                                                                                                                                                        |         |         |  |       |        |               |   |         |           |         |   |           |     |         |           |         |   |         |  |         |   |         |   |         |         |   |  |         |         |   |  |         |         |   |  |         |         |   |                                                                                                                                                                                                                                                                                                                                                                                                                                                                                                                                                                                                                                                                                                                                                                                                                                                                                                                                                                                                                                                                                                                       |  |  |  |           |  |  |                 |     |   |   |             |  |  |  |              |  |  |  |              |  |  |  |     |   |         |         |  |   |         |         |  |   |         |         |  |   |         |         |   |         |   |         |  |         |   |         |  |         |   |         |  |         |   |         |   |         |         |   |  |         |         |   |  |         |         |   |  |         |         |   |                                                                                                                                                                                                                                                                                                                                                                                                                                                                                                                                                                                                                                                                                                                                                                                                                                                                                                                                                                                                                                                                                                                      |  |  |  |           |  |  |                 |     |   |   |             |  |  |  |              |  |  |  |              |  |  |  |     |   |         |         |  |   |         |         |  |   |        |         |  |   |         |         |   |         |   |         |  |         |   |         |  |         |   |         |  |         |   |         |   |         |         |   |  |         |         |   |  |         |         |   |  |         |         |   |
| Lower CL Dif                                                                                                                                                                                                                                                                                                                                                                                                                                                                                                                                                                                                                                                                                                                                                                                                                                                                                                                                                                                                                                                                                                       |         |               |         |                                                                  |  |               |                 |                                                                  |           |     |             |           |     |   |              |                                                                                                                                                                                                                                                                        |  |  |              |       |  |               |     |   |           |         |   |           |         |         |           |                                                                                                                                                                                                                                                                        |         |         |  |       |        |               |   |         |           |         |   |           |     |         |           |         |   |         |  |         |   |         |   |         |         |   |  |         |         |   |  |         |         |   |  |         |         |   |                                                                                                                                                                                                                                                                                                                                                                                                                                                                                                                                                                                                                                                                                                                                                                                                                                                                                                                                                                                                                                                                                                                       |  |  |  |           |  |  |                 |     |   |   |             |  |  |  |              |  |  |  |              |  |  |  |     |   |         |         |  |   |         |         |  |   |         |         |  |   |         |         |   |         |   |         |  |         |   |         |  |         |   |         |  |         |   |         |   |         |         |   |  |         |         |   |  |         |         |   |  |         |         |   |                                                                                                                                                                                                                                                                                                                                                                                                                                                                                                                                                                                                                                                                                                                                                                                                                                                                                                                                                                                                                                                                                                                      |  |  |  |           |  |  |                 |     |   |   |             |  |  |  |              |  |  |  |              |  |  |  |     |   |         |         |  |   |         |         |  |   |        |         |  |   |         |         |   |         |   |         |  |         |   |         |  |         |   |         |  |         |   |         |   |         |         |   |  |         |         |   |  |         |         |   |  |         |         |   |
| Upper CL Dif                                                                                                                                                                                                                                                                                                                                                                                                                                                                                                                                                                                                                                                                                                                                                                                                                                                                                                                                                                                                                                                                                                       |         |               |         |                                                                  |  |               |                 |                                                                  |           |     |             |           |     |   |              |                                                                                                                                                                                                                                                                        |  |  |              |       |  |               |     |   |           |         |   |           |         |         |           |                                                                                                                                                                                                                                                                        |         |         |  |       |        |               |   |         |           |         |   |           |     |         |           |         |   |         |  |         |   |         |   |         |         |   |  |         |         |   |  |         |         |   |  |         |         |   |                                                                                                                                                                                                                                                                                                                                                                                                                                                                                                                                                                                                                                                                                                                                                                                                                                                                                                                                                                                                                                                                                                                       |  |  |  |           |  |  |                 |     |   |   |             |  |  |  |              |  |  |  |              |  |  |  |     |   |         |         |  |   |         |         |  |   |         |         |  |   |         |         |   |         |   |         |  |         |   |         |  |         |   |         |  |         |   |         |   |         |         |   |  |         |         |   |  |         |         |   |  |         |         |   |                                                                                                                                                                                                                                                                                                                                                                                                                                                                                                                                                                                                                                                                                                                                                                                                                                                                                                                                                                                                                                                                                                                      |  |  |  |           |  |  |                 |     |   |   |             |  |  |  |              |  |  |  |              |  |  |  |     |   |         |         |  |   |         |         |  |   |        |         |  |   |         |         |   |         |   |         |  |         |   |         |  |         |   |         |  |         |   |         |   |         |         |   |  |         |         |   |  |         |         |   |  |         |         |   |
| 0.5                                                                                                                                                                                                                                                                                                                                                                                                                                                                                                                                                                                                                                                                                                                                                                                                                                                                                                                                                                                                                                                                                                                | 0       | -10.724       | -22.973 |                                                                  |  |               |                 |                                                                  |           |     |             |           |     |   |              |                                                                                                                                                                                                                                                                        |  |  |              |       |  |               |     |   |           |         |   |           |         |         |           |                                                                                                                                                                                                                                                                        |         |         |  |       |        |               |   |         |           |         |   |           |     |         |           |         |   |         |  |         |   |         |   |         |         |   |  |         |         |   |  |         |         |   |  |         |         |   |                                                                                                                                                                                                                                                                                                                                                                                                                                                                                                                                                                                                                                                                                                                                                                                                                                                                                                                                                                                                                                                                                                                       |  |  |  |           |  |  |                 |     |   |   |             |  |  |  |              |  |  |  |              |  |  |  |     |   |         |         |  |   |         |         |  |   |         |         |  |   |         |         |   |         |   |         |  |         |   |         |  |         |   |         |  |         |   |         |   |         |         |   |  |         |         |   |  |         |         |   |  |         |         |   |                                                                                                                                                                                                                                                                                                                                                                                                                                                                                                                                                                                                                                                                                                                                                                                                                                                                                                                                                                                                                                                                                                                      |  |  |  |           |  |  |                 |     |   |   |             |  |  |  |              |  |  |  |              |  |  |  |     |   |         |         |  |   |         |         |  |   |        |         |  |   |         |         |   |         |   |         |  |         |   |         |  |         |   |         |  |         |   |         |   |         |         |   |  |         |         |   |  |         |         |   |  |         |         |   |
|                                                                                                                                                                                                                                                                                                                                                                                                                                                                                                                                                                                                                                                                                                                                                                                                                                                                                                                                                                                                                                                                                                                    | 0       | 27.2546       | 28.4665 |                                                                  |  |               |                 |                                                                  |           |     |             |           |     |   |              |                                                                                                                                                                                                                                                                        |  |  |              |       |  |               |     |   |           |         |   |           |         |         |           |                                                                                                                                                                                                                                                                        |         |         |  |       |        |               |   |         |           |         |   |           |     |         |           |         |   |         |  |         |   |         |   |         |         |   |  |         |         |   |  |         |         |   |  |         |         |   |                                                                                                                                                                                                                                                                                                                                                                                                                                                                                                                                                                                                                                                                                                                                                                                                                                                                                                                                                                                                                                                                                                                       |  |  |  |           |  |  |                 |     |   |   |             |  |  |  |              |  |  |  |              |  |  |  |     |   |         |         |  |   |         |         |  |   |         |         |  |   |         |         |   |         |   |         |  |         |   |         |  |         |   |         |  |         |   |         |   |         |         |   |  |         |         |   |  |         |         |   |  |         |         |   |                                                                                                                                                                                                                                                                                                                                                                                                                                                                                                                                                                                                                                                                                                                                                                                                                                                                                                                                                                                                                                                                                                                      |  |  |  |           |  |  |                 |     |   |   |             |  |  |  |              |  |  |  |              |  |  |  |     |   |         |         |  |   |         |         |  |   |        |         |  |   |         |         |   |         |   |         |  |         |   |         |  |         |   |         |  |         |   |         |   |         |         |   |  |         |         |   |  |         |         |   |  |         |         |   |
|                                                                                                                                                                                                                                                                                                                                                                                                                                                                                                                                                                                                                                                                                                                                                                                                                                                                                                                                                                                                                                                                                                                    | 0       | -82.688       | -98.137 |                                                                  |  |               |                 |                                                                  |           |     |             |           |     |   |              |                                                                                                                                                                                                                                                                        |  |  |              |       |  |               |     |   |           |         |   |           |         |         |           |                                                                                                                                                                                                                                                                        |         |         |  |       |        |               |   |         |           |         |   |           |     |         |           |         |   |         |  |         |   |         |   |         |         |   |  |         |         |   |  |         |         |   |  |         |         |   |                                                                                                                                                                                                                                                                                                                                                                                                                                                                                                                                                                                                                                                                                                                                                                                                                                                                                                                                                                                                                                                                                                                       |  |  |  |           |  |  |                 |     |   |   |             |  |  |  |              |  |  |  |              |  |  |  |     |   |         |         |  |   |         |         |  |   |         |         |  |   |         |         |   |         |   |         |  |         |   |         |  |         |   |         |  |         |   |         |   |         |         |   |  |         |         |   |  |         |         |   |  |         |         |   |                                                                                                                                                                                                                                                                                                                                                                                                                                                                                                                                                                                                                                                                                                                                                                                                                                                                                                                                                                                                                                                                                                                      |  |  |  |           |  |  |                 |     |   |   |             |  |  |  |              |  |  |  |              |  |  |  |     |   |         |         |  |   |         |         |  |   |        |         |  |   |         |         |   |         |   |         |  |         |   |         |  |         |   |         |  |         |   |         |   |         |         |   |  |         |         |   |  |         |         |   |  |         |         |   |
|                                                                                                                                                                                                                                                                                                                                                                                                                                                                                                                                                                                                                                                                                                                                                                                                                                                                                                                                                                                                                                                                                                                    | 0       | 61.2397       | 52.1909 |                                                                  |  |               |                 |                                                                  |           |     |             |           |     |   |              |                                                                                                                                                                                                                                                                        |  |  |              |       |  |               |     |   |           |         |   |           |         |         |           |                                                                                                                                                                                                                                                                        |         |         |  |       |        |               |   |         |           |         |   |           |     |         |           |         |   |         |  |         |   |         |   |         |         |   |  |         |         |   |  |         |         |   |  |         |         |   |                                                                                                                                                                                                                                                                                                                                                                                                                                                                                                                                                                                                                                                                                                                                                                                                                                                                                                                                                                                                                                                                                                                       |  |  |  |           |  |  |                 |     |   |   |             |  |  |  |              |  |  |  |              |  |  |  |     |   |         |         |  |   |         |         |  |   |         |         |  |   |         |         |   |         |   |         |  |         |   |         |  |         |   |         |  |         |   |         |   |         |         |   |  |         |         |   |  |         |         |   |  |         |         |   |                                                                                                                                                                                                                                                                                                                                                                                                                                                                                                                                                                                                                                                                                                                                                                                                                                                                                                                                                                                                                                                                                                                      |  |  |  |           |  |  |                 |     |   |   |             |  |  |  |              |  |  |  |              |  |  |  |     |   |         |         |  |   |         |         |  |   |        |         |  |   |         |         |   |         |   |         |  |         |   |         |  |         |   |         |  |         |   |         |   |         |         |   |  |         |         |   |  |         |         |   |  |         |         |   |
| 1                                                                                                                                                                                                                                                                                                                                                                                                                                                                                                                                                                                                                                                                                                                                                                                                                                                                                                                                                                                                                                                                                                                  | 10.7242 | 0             | -12.249 |                                                                  |  |               |                 |                                                                  |           |     |             |           |     |   |              |                                                                                                                                                                                                                                                                        |  |  |              |       |  |               |     |   |           |         |   |           |         |         |           |                                                                                                                                                                                                                                                                        |         |         |  |       |        |               |   |         |           |         |   |           |     |         |           |         |   |         |  |         |   |         |   |         |         |   |  |         |         |   |  |         |         |   |  |         |         |   |                                                                                                                                                                                                                                                                                                                                                                                                                                                                                                                                                                                                                                                                                                                                                                                                                                                                                                                                                                                                                                                                                                                       |  |  |  |           |  |  |                 |     |   |   |             |  |  |  |              |  |  |  |              |  |  |  |     |   |         |         |  |   |         |         |  |   |         |         |  |   |         |         |   |         |   |         |  |         |   |         |  |         |   |         |  |         |   |         |   |         |         |   |  |         |         |   |  |         |         |   |  |         |         |   |                                                                                                                                                                                                                                                                                                                                                                                                                                                                                                                                                                                                                                                                                                                                                                                                                                                                                                                                                                                                                                                                                                                      |  |  |  |           |  |  |                 |     |   |   |             |  |  |  |              |  |  |  |              |  |  |  |     |   |         |         |  |   |         |         |  |   |        |         |  |   |         |         |   |         |   |         |  |         |   |         |  |         |   |         |  |         |   |         |   |         |         |   |  |         |         |   |  |         |         |   |  |         |         |   |
|                                                                                                                                                                                                                                                                                                                                                                                                                                                                                                                                                                                                                                                                                                                                                                                                                                                                                                                                                                                                                                                                                                                    | 27.2546 | 0             | 27.2546 |                                                                  |  |               |                 |                                                                  |           |     |             |           |     |   |              |                                                                                                                                                                                                                                                                        |  |  |              |       |  |               |     |   |           |         |   |           |         |         |           |                                                                                                                                                                                                                                                                        |         |         |  |       |        |               |   |         |           |         |   |           |     |         |           |         |   |         |  |         |   |         |   |         |         |   |  |         |         |   |  |         |         |   |  |         |         |   |                                                                                                                                                                                                                                                                                                                                                                                                                                                                                                                                                                                                                                                                                                                                                                                                                                                                                                                                                                                                                                                                                                                       |  |  |  |           |  |  |                 |     |   |   |             |  |  |  |              |  |  |  |              |  |  |  |     |   |         |         |  |   |         |         |  |   |         |         |  |   |         |         |   |         |   |         |  |         |   |         |  |         |   |         |  |         |   |         |   |         |         |   |  |         |         |   |  |         |         |   |  |         |         |   |                                                                                                                                                                                                                                                                                                                                                                                                                                                                                                                                                                                                                                                                                                                                                                                                                                                                                                                                                                                                                                                                                                                      |  |  |  |           |  |  |                 |     |   |   |             |  |  |  |              |  |  |  |              |  |  |  |     |   |         |         |  |   |         |         |  |   |        |         |  |   |         |         |   |         |   |         |  |         |   |         |  |         |   |         |  |         |   |         |   |         |         |   |  |         |         |   |  |         |         |   |  |         |         |   |
|                                                                                                                                                                                                                                                                                                                                                                                                                                                                                                                                                                                                                                                                                                                                                                                                                                                                                                                                                                                                                                                                                                                    | -61.24  | 0             | -84.213 |                                                                  |  |               |                 |                                                                  |           |     |             |           |     |   |              |                                                                                                                                                                                                                                                                        |  |  |              |       |  |               |     |   |           |         |   |           |         |         |           |                                                                                                                                                                                                                                                                        |         |         |  |       |        |               |   |         |           |         |   |           |     |         |           |         |   |         |  |         |   |         |   |         |         |   |  |         |         |   |  |         |         |   |  |         |         |   |                                                                                                                                                                                                                                                                                                                                                                                                                                                                                                                                                                                                                                                                                                                                                                                                                                                                                                                                                                                                                                                                                                                       |  |  |  |           |  |  |                 |     |   |   |             |  |  |  |              |  |  |  |              |  |  |  |     |   |         |         |  |   |         |         |  |   |         |         |  |   |         |         |   |         |   |         |  |         |   |         |  |         |   |         |  |         |   |         |   |         |         |   |  |         |         |   |  |         |         |   |  |         |         |   |                                                                                                                                                                                                                                                                                                                                                                                                                                                                                                                                                                                                                                                                                                                                                                                                                                                                                                                                                                                                                                                                                                                      |  |  |  |           |  |  |                 |     |   |   |             |  |  |  |              |  |  |  |              |  |  |  |     |   |         |         |  |   |         |         |  |   |        |         |  |   |         |         |   |         |   |         |  |         |   |         |  |         |   |         |  |         |   |         |   |         |         |   |  |         |         |   |  |         |         |   |  |         |         |   |
|                                                                                                                                                                                                                                                                                                                                                                                                                                                                                                                                                                                                                                                                                                                                                                                                                                                                                                                                                                                                                                                                                                                    | 82.6882 | 0             | 59.7152 |                                                                  |  |               |                 |                                                                  |           |     |             |           |     |   |              |                                                                                                                                                                                                                                                                        |  |  |              |       |  |               |     |   |           |         |   |           |         |         |           |                                                                                                                                                                                                                                                                        |         |         |  |       |        |               |   |         |           |         |   |           |     |         |           |         |   |         |  |         |   |         |   |         |         |   |  |         |         |   |  |         |         |   |  |         |         |   |                                                                                                                                                                                                                                                                                                                                                                                                                                                                                                                                                                                                                                                                                                                                                                                                                                                                                                                                                                                                                                                                                                                       |  |  |  |           |  |  |                 |     |   |   |             |  |  |  |              |  |  |  |              |  |  |  |     |   |         |         |  |   |         |         |  |   |         |         |  |   |         |         |   |         |   |         |  |         |   |         |  |         |   |         |  |         |   |         |   |         |         |   |  |         |         |   |  |         |         |   |  |         |         |   |                                                                                                                                                                                                                                                                                                                                                                                                                                                                                                                                                                                                                                                                                                                                                                                                                                                                                                                                                                                                                                                                                                                      |  |  |  |           |  |  |                 |     |   |   |             |  |  |  |              |  |  |  |              |  |  |  |     |   |         |         |  |   |         |         |  |   |        |         |  |   |         |         |   |         |   |         |  |         |   |         |  |         |   |         |  |         |   |         |   |         |         |   |  |         |         |   |  |         |         |   |  |         |         |   |
| 2                                                                                                                                                                                                                                                                                                                                                                                                                                                                                                                                                                                                                                                                                                                                                                                                                                                                                                                                                                                                                                                                                                                  | 22.9729 | 12.2487       | 0       |                                                                  |  |               |                 |                                                                  |           |     |             |           |     |   |              |                                                                                                                                                                                                                                                                        |  |  |              |       |  |               |     |   |           |         |   |           |         |         |           |                                                                                                                                                                                                                                                                        |         |         |  |       |        |               |   |         |           |         |   |           |     |         |           |         |   |         |  |         |   |         |   |         |         |   |  |         |         |   |  |         |         |   |  |         |         |   |                                                                                                                                                                                                                                                                                                                                                                                                                                                                                                                                                                                                                                                                                                                                                                                                                                                                                                                                                                                                                                                                                                                       |  |  |  |           |  |  |                 |     |   |   |             |  |  |  |              |  |  |  |              |  |  |  |     |   |         |         |  |   |         |         |  |   |         |         |  |   |         |         |   |         |   |         |  |         |   |         |  |         |   |         |  |         |   |         |   |         |         |   |  |         |         |   |  |         |         |   |  |         |         |   |                                                                                                                                                                                                                                                                                                                                                                                                                                                                                                                                                                                                                                                                                                                                                                                                                                                                                                                                                                                                                                                                                                                      |  |  |  |           |  |  |                 |     |   |   |             |  |  |  |              |  |  |  |              |  |  |  |     |   |         |         |  |   |         |         |  |   |        |         |  |   |         |         |   |         |   |         |  |         |   |         |  |         |   |         |  |         |   |         |   |         |         |   |  |         |         |   |  |         |         |   |  |         |         |   |
|                                                                                                                                                                                                                                                                                                                                                                                                                                                                                                                                                                                                                                                                                                                                                                                                                                                                                                                                                                                                                                                                                                                    | 28.4665 | 27.2546       | 0       |                                                                  |  |               |                 |                                                                  |           |     |             |           |     |   |              |                                                                                                                                                                                                                                                                        |  |  |              |       |  |               |     |   |           |         |   |           |         |         |           |                                                                                                                                                                                                                                                                        |         |         |  |       |        |               |   |         |           |         |   |           |     |         |           |         |   |         |  |         |   |         |   |         |         |   |  |         |         |   |  |         |         |   |  |         |         |   |                                                                                                                                                                                                                                                                                                                                                                                                                                                                                                                                                                                                                                                                                                                                                                                                                                                                                                                                                                                                                                                                                                                       |  |  |  |           |  |  |                 |     |   |   |             |  |  |  |              |  |  |  |              |  |  |  |     |   |         |         |  |   |         |         |  |   |         |         |  |   |         |         |   |         |   |         |  |         |   |         |  |         |   |         |  |         |   |         |   |         |         |   |  |         |         |   |  |         |         |   |  |         |         |   |                                                                                                                                                                                                                                                                                                                                                                                                                                                                                                                                                                                                                                                                                                                                                                                                                                                                                                                                                                                                                                                                                                                      |  |  |  |           |  |  |                 |     |   |   |             |  |  |  |              |  |  |  |              |  |  |  |     |   |         |         |  |   |         |         |  |   |        |         |  |   |         |         |   |         |   |         |  |         |   |         |  |         |   |         |  |         |   |         |   |         |         |   |  |         |         |   |  |         |         |   |  |         |         |   |
|                                                                                                                                                                                                                                                                                                                                                                                                                                                                                                                                                                                                                                                                                                                                                                                                                                                                                                                                                                                                                                                                                                                    | -52.191 | -59.715       | 0       |                                                                  |  |               |                 |                                                                  |           |     |             |           |     |   |              |                                                                                                                                                                                                                                                                        |  |  |              |       |  |               |     |   |           |         |   |           |         |         |           |                                                                                                                                                                                                                                                                        |         |         |  |       |        |               |   |         |           |         |   |           |     |         |           |         |   |         |  |         |   |         |   |         |         |   |  |         |         |   |  |         |         |   |  |         |         |   |                                                                                                                                                                                                                                                                                                                                                                                                                                                                                                                                                                                                                                                                                                                                                                                                                                                                                                                                                                                                                                                                                                                       |  |  |  |           |  |  |                 |     |   |   |             |  |  |  |              |  |  |  |              |  |  |  |     |   |         |         |  |   |         |         |  |   |         |         |  |   |         |         |   |         |   |         |  |         |   |         |  |         |   |         |  |         |   |         |   |         |         |   |  |         |         |   |  |         |         |   |  |         |         |   |                                                                                                                                                                                                                                                                                                                                                                                                                                                                                                                                                                                                                                                                                                                                                                                                                                                                                                                                                                                                                                                                                                                      |  |  |  |           |  |  |                 |     |   |   |             |  |  |  |              |  |  |  |              |  |  |  |     |   |         |         |  |   |         |         |  |   |        |         |  |   |         |         |   |         |   |         |  |         |   |         |  |         |   |         |  |         |   |         |   |         |         |   |  |         |         |   |  |         |         |   |  |         |         |   |
|                                                                                                                                                                                                                                                                                                                                                                                                                                                                                                                                                                                                                                                                                                                                                                                                                                                                                                                                                                                                                                                                                                                    | 98.1368 | 84.2126       | 0       |                                                                  |  |               |                 |                                                                  |           |     |             |           |     |   |              |                                                                                                                                                                                                                                                                        |  |  |              |       |  |               |     |   |           |         |   |           |         |         |           |                                                                                                                                                                                                                                                                        |         |         |  |       |        |               |   |         |           |         |   |           |     |         |           |         |   |         |  |         |   |         |   |         |         |   |  |         |         |   |  |         |         |   |  |         |         |   |                                                                                                                                                                                                                                                                                                                                                                                                                                                                                                                                                                                                                                                                                                                                                                                                                                                                                                                                                                                                                                                                                                                       |  |  |  |           |  |  |                 |     |   |   |             |  |  |  |              |  |  |  |              |  |  |  |     |   |         |         |  |   |         |         |  |   |         |         |  |   |         |         |   |         |   |         |  |         |   |         |  |         |   |         |  |         |   |         |   |         |         |   |  |         |         |   |  |         |         |   |  |         |         |   |                                                                                                                                                                                                                                                                                                                                                                                                                                                                                                                                                                                                                                                                                                                                                                                                                                                                                                                                                                                                                                                                                                                      |  |  |  |           |  |  |                 |     |   |   |             |  |  |  |              |  |  |  |              |  |  |  |     |   |         |         |  |   |         |         |  |   |        |         |  |   |         |         |   |         |   |         |  |         |   |         |  |         |   |         |  |         |   |         |   |         |         |   |  |         |         |   |  |         |         |   |  |         |         |   |
| LSMean[j]                                                                                                                                                                                                                                                                                                                                                                                                                                                                                                                                                                                                                                                                                                                                                                                                                                                                                                                                                                                                                                                                                                          |         |               |         |                                                                  |  |               |                 |                                                                  |           |     |             |           |     |   |              |                                                                                                                                                                                                                                                                        |  |  |              |       |  |               |     |   |           |         |   |           |         |         |           |                                                                                                                                                                                                                                                                        |         |         |  |       |        |               |   |         |           |         |   |           |     |         |           |         |   |         |  |         |   |         |   |         |         |   |  |         |         |   |  |         |         |   |  |         |         |   |                                                                                                                                                                                                                                                                                                                                                                                                                                                                                                                                                                                                                                                                                                                                                                                                                                                                                                                                                                                                                                                                                                                       |  |  |  |           |  |  |                 |     |   |   |             |  |  |  |              |  |  |  |              |  |  |  |     |   |         |         |  |   |         |         |  |   |         |         |  |   |         |         |   |         |   |         |  |         |   |         |  |         |   |         |  |         |   |         |   |         |         |   |  |         |         |   |  |         |         |   |  |         |         |   |                                                                                                                                                                                                                                                                                                                                                                                                                                                                                                                                                                                                                                                                                                                                                                                                                                                                                                                                                                                                                                                                                                                      |  |  |  |           |  |  |                 |     |   |   |             |  |  |  |              |  |  |  |              |  |  |  |     |   |         |         |  |   |         |         |  |   |        |         |  |   |         |         |   |         |   |         |  |         |   |         |  |         |   |         |  |         |   |         |   |         |         |   |  |         |         |   |  |         |         |   |  |         |         |   |
| Mean[j]-Mean[j]                                                                                                                                                                                                                                                                                                                                                                                                                                                                                                                                                                                                                                                                                                                                                                                                                                                                                                                                                                                                                                                                                                    | 0.5     | 1             | 2       |                                                                  |  |               |                 |                                                                  |           |     |             |           |     |   |              |                                                                                                                                                                                                                                                                        |  |  |              |       |  |               |     |   |           |         |   |           |         |         |           |                                                                                                                                                                                                                                                                        |         |         |  |       |        |               |   |         |           |         |   |           |     |         |           |         |   |         |  |         |   |         |   |         |         |   |  |         |         |   |  |         |         |   |  |         |         |   |                                                                                                                                                                                                                                                                                                                                                                                                                                                                                                                                                                                                                                                                                                                                                                                                                                                                                                                                                                                                                                                                                                                       |  |  |  |           |  |  |                 |     |   |   |             |  |  |  |              |  |  |  |              |  |  |  |     |   |         |         |  |   |         |         |  |   |         |         |  |   |         |         |   |         |   |         |  |         |   |         |  |         |   |         |  |         |   |         |   |         |         |   |  |         |         |   |  |         |         |   |  |         |         |   |                                                                                                                                                                                                                                                                                                                                                                                                                                                                                                                                                                                                                                                                                                                                                                                                                                                                                                                                                                                                                                                                                                                      |  |  |  |           |  |  |                 |     |   |   |             |  |  |  |              |  |  |  |              |  |  |  |     |   |         |         |  |   |         |         |  |   |        |         |  |   |         |         |   |         |   |         |  |         |   |         |  |         |   |         |  |         |   |         |   |         |         |   |  |         |         |   |  |         |         |   |  |         |         |   |
| Std Err Dif                                                                                                                                                                                                                                                                                                                                                                                                                                                                                                                                                                                                                                                                                                                                                                                                                                                                                                                                                                                                                                                                                                        |         |               |         |                                                                  |  |               |                 |                                                                  |           |     |             |           |     |   |              |                                                                                                                                                                                                                                                                        |  |  |              |       |  |               |     |   |           |         |   |           |         |         |           |                                                                                                                                                                                                                                                                        |         |         |  |       |        |               |   |         |           |         |   |           |     |         |           |         |   |         |  |         |   |         |   |         |         |   |  |         |         |   |  |         |         |   |  |         |         |   |                                                                                                                                                                                                                                                                                                                                                                                                                                                                                                                                                                                                                                                                                                                                                                                                                                                                                                                                                                                                                                                                                                                       |  |  |  |           |  |  |                 |     |   |   |             |  |  |  |              |  |  |  |              |  |  |  |     |   |         |         |  |   |         |         |  |   |         |         |  |   |         |         |   |         |   |         |  |         |   |         |  |         |   |         |  |         |   |         |   |         |         |   |  |         |         |   |  |         |         |   |  |         |         |   |                                                                                                                                                                                                                                                                                                                                                                                                                                                                                                                                                                                                                                                                                                                                                                                                                                                                                                                                                                                                                                                                                                                      |  |  |  |           |  |  |                 |     |   |   |             |  |  |  |              |  |  |  |              |  |  |  |     |   |         |         |  |   |         |         |  |   |        |         |  |   |         |         |   |         |   |         |  |         |   |         |  |         |   |         |  |         |   |         |   |         |         |   |  |         |         |   |  |         |         |   |  |         |         |   |
| Lower CL Dif                                                                                                                                                                                                                                                                                                                                                                                                                                                                                                                                                                                                                                                                                                                                                                                                                                                                                                                                                                                                                                                                                                       |         |               |         |                                                                  |  |               |                 |                                                                  |           |     |             |           |     |   |              |                                                                                                                                                                                                                                                                        |  |  |              |       |  |               |     |   |           |         |   |           |         |         |           |                                                                                                                                                                                                                                                                        |         |         |  |       |        |               |   |         |           |         |   |           |     |         |           |         |   |         |  |         |   |         |   |         |         |   |  |         |         |   |  |         |         |   |  |         |         |   |                                                                                                                                                                                                                                                                                                                                                                                                                                                                                                                                                                                                                                                                                                                                                                                                                                                                                                                                                                                                                                                                                                                       |  |  |  |           |  |  |                 |     |   |   |             |  |  |  |              |  |  |  |              |  |  |  |     |   |         |         |  |   |         |         |  |   |         |         |  |   |         |         |   |         |   |         |  |         |   |         |  |         |   |         |  |         |   |         |   |         |         |   |  |         |         |   |  |         |         |   |  |         |         |   |                                                                                                                                                                                                                                                                                                                                                                                                                                                                                                                                                                                                                                                                                                                                                                                                                                                                                                                                                                                                                                                                                                                      |  |  |  |           |  |  |                 |     |   |   |             |  |  |  |              |  |  |  |              |  |  |  |     |   |         |         |  |   |         |         |  |   |        |         |  |   |         |         |   |         |   |         |  |         |   |         |  |         |   |         |  |         |   |         |   |         |         |   |  |         |         |   |  |         |         |   |  |         |         |   |
| Upper CL Dif                                                                                                                                                                                                                                                                                                                                                                                                                                                                                                                                                                                                                                                                                                                                                                                                                                                                                                                                                                                                                                                                                                       |         |               |         |                                                                  |  |               |                 |                                                                  |           |     |             |           |     |   |              |                                                                                                                                                                                                                                                                        |  |  |              |       |  |               |     |   |           |         |   |           |         |         |           |                                                                                                                                                                                                                                                                        |         |         |  |       |        |               |   |         |           |         |   |           |     |         |           |         |   |         |  |         |   |         |   |         |         |   |  |         |         |   |  |         |         |   |  |         |         |   |                                                                                                                                                                                                                                                                                                                                                                                                                                                                                                                                                                                                                                                                                                                                                                                                                                                                                                                                                                                                                                                                                                                       |  |  |  |           |  |  |                 |     |   |   |             |  |  |  |              |  |  |  |              |  |  |  |     |   |         |         |  |   |         |         |  |   |         |         |  |   |         |         |   |         |   |         |  |         |   |         |  |         |   |         |  |         |   |         |   |         |         |   |  |         |         |   |  |         |         |   |  |         |         |   |                                                                                                                                                                                                                                                                                                                                                                                                                                                                                                                                                                                                                                                                                                                                                                                                                                                                                                                                                                                                                                                                                                                      |  |  |  |           |  |  |                 |     |   |   |             |  |  |  |              |  |  |  |              |  |  |  |     |   |         |         |  |   |         |         |  |   |        |         |  |   |         |         |   |         |   |         |  |         |   |         |  |         |   |         |  |         |   |         |   |         |         |   |  |         |         |   |  |         |         |   |  |         |         |   |
| 0.5                                                                                                                                                                                                                                                                                                                                                                                                                                                                                                                                                                                                                                                                                                                                                                                                                                                                                                                                                                                                                                                                                                                | 0       | -7.8864       | -61.381 |                                                                  |  |               |                 |                                                                  |           |     |             |           |     |   |              |                                                                                                                                                                                                                                                                        |  |  |              |       |  |               |     |   |           |         |   |           |         |         |           |                                                                                                                                                                                                                                                                        |         |         |  |       |        |               |   |         |           |         |   |           |     |         |           |         |   |         |  |         |   |         |   |         |         |   |  |         |         |   |  |         |         |   |  |         |         |   |                                                                                                                                                                                                                                                                                                                                                                                                                                                                                                                                                                                                                                                                                                                                                                                                                                                                                                                                                                                                                                                                                                                       |  |  |  |           |  |  |                 |     |   |   |             |  |  |  |              |  |  |  |              |  |  |  |     |   |         |         |  |   |         |         |  |   |         |         |  |   |         |         |   |         |   |         |  |         |   |         |  |         |   |         |  |         |   |         |   |         |         |   |  |         |         |   |  |         |         |   |  |         |         |   |                                                                                                                                                                                                                                                                                                                                                                                                                                                                                                                                                                                                                                                                                                                                                                                                                                                                                                                                                                                                                                                                                                                      |  |  |  |           |  |  |                 |     |   |   |             |  |  |  |              |  |  |  |              |  |  |  |     |   |         |         |  |   |         |         |  |   |        |         |  |   |         |         |   |         |   |         |  |         |   |         |  |         |   |         |  |         |   |         |   |         |         |   |  |         |         |   |  |         |         |   |  |         |         |   |
|                                                                                                                                                                                                                                                                                                                                                                                                                                                                                                                                                                                                                                                                                                                                                                                                                                                                                                                                                                                                                                                                                                                    | 0       | 13.8212       | 15.4967 |                                                                  |  |               |                 |                                                                  |           |     |             |           |     |   |              |                                                                                                                                                                                                                                                                        |  |  |              |       |  |               |     |   |           |         |   |           |         |         |           |                                                                                                                                                                                                                                                                        |         |         |  |       |        |               |   |         |           |         |   |           |     |         |           |         |   |         |  |         |   |         |   |         |         |   |  |         |         |   |  |         |         |   |  |         |         |   |                                                                                                                                                                                                                                                                                                                                                                                                                                                                                                                                                                                                                                                                                                                                                                                                                                                                                                                                                                                                                                                                                                                       |  |  |  |           |  |  |                 |     |   |   |             |  |  |  |              |  |  |  |              |  |  |  |     |   |         |         |  |   |         |         |  |   |         |         |  |   |         |         |   |         |   |         |  |         |   |         |  |         |   |         |  |         |   |         |   |         |         |   |  |         |         |   |  |         |         |   |  |         |         |   |                                                                                                                                                                                                                                                                                                                                                                                                                                                                                                                                                                                                                                                                                                                                                                                                                                                                                                                                                                                                                                                                                                                      |  |  |  |           |  |  |                 |     |   |   |             |  |  |  |              |  |  |  |              |  |  |  |     |   |         |         |  |   |         |         |  |   |        |         |  |   |         |         |   |         |   |         |  |         |   |         |  |         |   |         |  |         |   |         |   |         |         |   |  |         |         |   |  |         |         |   |  |         |         |   |
|                                                                                                                                                                                                                                                                                                                                                                                                                                                                                                                                                                                                                                                                                                                                                                                                                                                                                                                                                                                                                                                                                                                    | 0       | -43.55        | -101.37 |                                                                  |  |               |                 |                                                                  |           |     |             |           |     |   |              |                                                                                                                                                                                                                                                                        |  |  |              |       |  |               |     |   |           |         |   |           |         |         |           |                                                                                                                                                                                                                                                                        |         |         |  |       |        |               |   |         |           |         |   |           |     |         |           |         |   |         |  |         |   |         |   |         |         |   |  |         |         |   |  |         |         |   |  |         |         |   |                                                                                                                                                                                                                                                                                                                                                                                                                                                                                                                                                                                                                                                                                                                                                                                                                                                                                                                                                                                                                                                                                                                       |  |  |  |           |  |  |                 |     |   |   |             |  |  |  |              |  |  |  |              |  |  |  |     |   |         |         |  |   |         |         |  |   |         |         |  |   |         |         |   |         |   |         |  |         |   |         |  |         |   |         |  |         |   |         |   |         |         |   |  |         |         |   |  |         |         |   |  |         |         |   |                                                                                                                                                                                                                                                                                                                                                                                                                                                                                                                                                                                                                                                                                                                                                                                                                                                                                                                                                                                                                                                                                                                      |  |  |  |           |  |  |                 |     |   |   |             |  |  |  |              |  |  |  |              |  |  |  |     |   |         |         |  |   |         |         |  |   |        |         |  |   |         |         |   |         |   |         |  |         |   |         |  |         |   |         |  |         |   |         |   |         |         |   |  |         |         |   |  |         |         |   |  |         |         |   |
|                                                                                                                                                                                                                                                                                                                                                                                                                                                                                                                                                                                                                                                                                                                                                                                                                                                                                                                                                                                                                                                                                                                    | 0       | 27.7769       | -21.395 |                                                                  |  |               |                 |                                                                  |           |     |             |           |     |   |              |                                                                                                                                                                                                                                                                        |  |  |              |       |  |               |     |   |           |         |   |           |         |         |           |                                                                                                                                                                                                                                                                        |         |         |  |       |        |               |   |         |           |         |   |           |     |         |           |         |   |         |  |         |   |         |   |         |         |   |  |         |         |   |  |         |         |   |  |         |         |   |                                                                                                                                                                                                                                                                                                                                                                                                                                                                                                                                                                                                                                                                                                                                                                                                                                                                                                                                                                                                                                                                                                                       |  |  |  |           |  |  |                 |     |   |   |             |  |  |  |              |  |  |  |              |  |  |  |     |   |         |         |  |   |         |         |  |   |         |         |  |   |         |         |   |         |   |         |  |         |   |         |  |         |   |         |  |         |   |         |   |         |         |   |  |         |         |   |  |         |         |   |  |         |         |   |                                                                                                                                                                                                                                                                                                                                                                                                                                                                                                                                                                                                                                                                                                                                                                                                                                                                                                                                                                                                                                                                                                                      |  |  |  |           |  |  |                 |     |   |   |             |  |  |  |              |  |  |  |              |  |  |  |     |   |         |         |  |   |         |         |  |   |        |         |  |   |         |         |   |         |   |         |  |         |   |         |  |         |   |         |  |         |   |         |   |         |         |   |  |         |         |   |  |         |         |   |  |         |         |   |
| 1                                                                                                                                                                                                                                                                                                                                                                                                                                                                                                                                                                                                                                                                                                                                                                                                                                                                                                                                                                                                                                                                                                                  | 7.88641 | 0             | -53.495 |                                                                  |  |               |                 |                                                                  |           |     |             |           |     |   |              |                                                                                                                                                                                                                                                                        |  |  |              |       |  |               |     |   |           |         |   |           |         |         |           |                                                                                                                                                                                                                                                                        |         |         |  |       |        |               |   |         |           |         |   |           |     |         |           |         |   |         |  |         |   |         |   |         |         |   |  |         |         |   |  |         |         |   |  |         |         |   |                                                                                                                                                                                                                                                                                                                                                                                                                                                                                                                                                                                                                                                                                                                                                                                                                                                                                                                                                                                                                                                                                                                       |  |  |  |           |  |  |                 |     |   |   |             |  |  |  |              |  |  |  |              |  |  |  |     |   |         |         |  |   |         |         |  |   |         |         |  |   |         |         |   |         |   |         |  |         |   |         |  |         |   |         |  |         |   |         |   |         |         |   |  |         |         |   |  |         |         |   |  |         |         |   |                                                                                                                                                                                                                                                                                                                                                                                                                                                                                                                                                                                                                                                                                                                                                                                                                                                                                                                                                                                                                                                                                                                      |  |  |  |           |  |  |                 |     |   |   |             |  |  |  |              |  |  |  |              |  |  |  |     |   |         |         |  |   |         |         |  |   |        |         |  |   |         |         |   |         |   |         |  |         |   |         |  |         |   |         |  |         |   |         |   |         |         |   |  |         |         |   |  |         |         |   |  |         |         |   |
|                                                                                                                                                                                                                                                                                                                                                                                                                                                                                                                                                                                                                                                                                                                                                                                                                                                                                                                                                                                                                                                                                                                    | 13.8212 | 0             | 14.5896 |                                                                  |  |               |                 |                                                                  |           |     |             |           |     |   |              |                                                                                                                                                                                                                                                                        |  |  |              |       |  |               |     |   |           |         |   |           |         |         |           |                                                                                                                                                                                                                                                                        |         |         |  |       |        |               |   |         |           |         |   |           |     |         |           |         |   |         |  |         |   |         |   |         |         |   |  |         |         |   |  |         |         |   |  |         |         |   |                                                                                                                                                                                                                                                                                                                                                                                                                                                                                                                                                                                                                                                                                                                                                                                                                                                                                                                                                                                                                                                                                                                       |  |  |  |           |  |  |                 |     |   |   |             |  |  |  |              |  |  |  |              |  |  |  |     |   |         |         |  |   |         |         |  |   |         |         |  |   |         |         |   |         |   |         |  |         |   |         |  |         |   |         |  |         |   |         |   |         |         |   |  |         |         |   |  |         |         |   |  |         |         |   |                                                                                                                                                                                                                                                                                                                                                                                                                                                                                                                                                                                                                                                                                                                                                                                                                                                                                                                                                                                                                                                                                                                      |  |  |  |           |  |  |                 |     |   |   |             |  |  |  |              |  |  |  |              |  |  |  |     |   |         |         |  |   |         |         |  |   |        |         |  |   |         |         |   |         |   |         |  |         |   |         |  |         |   |         |  |         |   |         |   |         |         |   |  |         |         |   |  |         |         |   |  |         |         |   |
|                                                                                                                                                                                                                                                                                                                                                                                                                                                                                                                                                                                                                                                                                                                                                                                                                                                                                                                                                                                                                                                                                                                    | -27.777 | 0             | -91.141 |                                                                  |  |               |                 |                                                                  |           |     |             |           |     |   |              |                                                                                                                                                                                                                                                                        |  |  |              |       |  |               |     |   |           |         |   |           |         |         |           |                                                                                                                                                                                                                                                                        |         |         |  |       |        |               |   |         |           |         |   |           |     |         |           |         |   |         |  |         |   |         |   |         |         |   |  |         |         |   |  |         |         |   |  |         |         |   |                                                                                                                                                                                                                                                                                                                                                                                                                                                                                                                                                                                                                                                                                                                                                                                                                                                                                                                                                                                                                                                                                                                       |  |  |  |           |  |  |                 |     |   |   |             |  |  |  |              |  |  |  |              |  |  |  |     |   |         |         |  |   |         |         |  |   |         |         |  |   |         |         |   |         |   |         |  |         |   |         |  |         |   |         |  |         |   |         |   |         |         |   |  |         |         |   |  |         |         |   |  |         |         |   |                                                                                                                                                                                                                                                                                                                                                                                                                                                                                                                                                                                                                                                                                                                                                                                                                                                                                                                                                                                                                                                                                                                      |  |  |  |           |  |  |                 |     |   |   |             |  |  |  |              |  |  |  |              |  |  |  |     |   |         |         |  |   |         |         |  |   |        |         |  |   |         |         |   |         |   |         |  |         |   |         |  |         |   |         |  |         |   |         |   |         |         |   |  |         |         |   |  |         |         |   |  |         |         |   |
|                                                                                                                                                                                                                                                                                                                                                                                                                                                                                                                                                                                                                                                                                                                                                                                                                                                                                                                                                                                                                                                                                                                    | 43.5497 | 0             | -15.849 |                                                                  |  |               |                 |                                                                  |           |     |             |           |     |   |              |                                                                                                                                                                                                                                                                        |  |  |              |       |  |               |     |   |           |         |   |           |         |         |           |                                                                                                                                                                                                                                                                        |         |         |  |       |        |               |   |         |           |         |   |           |     |         |           |         |   |         |  |         |   |         |   |         |         |   |  |         |         |   |  |         |         |   |  |         |         |   |                                                                                                                                                                                                                                                                                                                                                                                                                                                                                                                                                                                                                                                                                                                                                                                                                                                                                                                                                                                                                                                                                                                       |  |  |  |           |  |  |                 |     |   |   |             |  |  |  |              |  |  |  |              |  |  |  |     |   |         |         |  |   |         |         |  |   |         |         |  |   |         |         |   |         |   |         |  |         |   |         |  |         |   |         |  |         |   |         |   |         |         |   |  |         |         |   |  |         |         |   |  |         |         |   |                                                                                                                                                                                                                                                                                                                                                                                                                                                                                                                                                                                                                                                                                                                                                                                                                                                                                                                                                                                                                                                                                                                      |  |  |  |           |  |  |                 |     |   |   |             |  |  |  |              |  |  |  |              |  |  |  |     |   |         |         |  |   |         |         |  |   |        |         |  |   |         |         |   |         |   |         |  |         |   |         |  |         |   |         |  |         |   |         |   |         |         |   |  |         |         |   |  |         |         |   |  |         |         |   |
| 2                                                                                                                                                                                                                                                                                                                                                                                                                                                                                                                                                                                                                                                                                                                                                                                                                                                                                                                                                                                                                                                                                                                  | 61.3811 | 53.4947       | 0       |                                                                  |  |               |                 |                                                                  |           |     |             |           |     |   |              |                                                                                                                                                                                                                                                                        |  |  |              |       |  |               |     |   |           |         |   |           |         |         |           |                                                                                                                                                                                                                                                                        |         |         |  |       |        |               |   |         |           |         |   |           |     |         |           |         |   |         |  |         |   |         |   |         |         |   |  |         |         |   |  |         |         |   |  |         |         |   |                                                                                                                                                                                                                                                                                                                                                                                                                                                                                                                                                                                                                                                                                                                                                                                                                                                                                                                                                                                                                                                                                                                       |  |  |  |           |  |  |                 |     |   |   |             |  |  |  |              |  |  |  |              |  |  |  |     |   |         |         |  |   |         |         |  |   |         |         |  |   |         |         |   |         |   |         |  |         |   |         |  |         |   |         |  |         |   |         |   |         |         |   |  |         |         |   |  |         |         |   |  |         |         |   |                                                                                                                                                                                                                                                                                                                                                                                                                                                                                                                                                                                                                                                                                                                                                                                                                                                                                                                                                                                                                                                                                                                      |  |  |  |           |  |  |                 |     |   |   |             |  |  |  |              |  |  |  |              |  |  |  |     |   |         |         |  |   |         |         |  |   |        |         |  |   |         |         |   |         |   |         |  |         |   |         |  |         |   |         |  |         |   |         |   |         |         |   |  |         |         |   |  |         |         |   |  |         |         |   |
|                                                                                                                                                                                                                                                                                                                                                                                                                                                                                                                                                                                                                                                                                                                                                                                                                                                                                                                                                                                                                                                                                                                    | 15.4967 | 14.5896       | 0       |                                                                  |  |               |                 |                                                                  |           |     |             |           |     |   |              |                                                                                                                                                                                                                                                                        |  |  |              |       |  |               |     |   |           |         |   |           |         |         |           |                                                                                                                                                                                                                                                                        |         |         |  |       |        |               |   |         |           |         |   |           |     |         |           |         |   |         |  |         |   |         |   |         |         |   |  |         |         |   |  |         |         |   |  |         |         |   |                                                                                                                                                                                                                                                                                                                                                                                                                                                                                                                                                                                                                                                                                                                                                                                                                                                                                                                                                                                                                                                                                                                       |  |  |  |           |  |  |                 |     |   |   |             |  |  |  |              |  |  |  |              |  |  |  |     |   |         |         |  |   |         |         |  |   |         |         |  |   |         |         |   |         |   |         |  |         |   |         |  |         |   |         |  |         |   |         |   |         |         |   |  |         |         |   |  |         |         |   |  |         |         |   |                                                                                                                                                                                                                                                                                                                                                                                                                                                                                                                                                                                                                                                                                                                                                                                                                                                                                                                                                                                                                                                                                                                      |  |  |  |           |  |  |                 |     |   |   |             |  |  |  |              |  |  |  |              |  |  |  |     |   |         |         |  |   |         |         |  |   |        |         |  |   |         |         |   |         |   |         |  |         |   |         |  |         |   |         |  |         |   |         |   |         |         |   |  |         |         |   |  |         |         |   |  |         |         |   |
|                                                                                                                                                                                                                                                                                                                                                                                                                                                                                                                                                                                                                                                                                                                                                                                                                                                                                                                                                                                                                                                                                                                    | 21.3946 | 15.8486       | 0       |                                                                  |  |               |                 |                                                                  |           |     |             |           |     |   |              |                                                                                                                                                                                                                                                                        |  |  |              |       |  |               |     |   |           |         |   |           |         |         |           |                                                                                                                                                                                                                                                                        |         |         |  |       |        |               |   |         |           |         |   |           |     |         |           |         |   |         |  |         |   |         |   |         |         |   |  |         |         |   |  |         |         |   |  |         |         |   |                                                                                                                                                                                                                                                                                                                                                                                                                                                                                                                                                                                                                                                                                                                                                                                                                                                                                                                                                                                                                                                                                                                       |  |  |  |           |  |  |                 |     |   |   |             |  |  |  |              |  |  |  |              |  |  |  |     |   |         |         |  |   |         |         |  |   |         |         |  |   |         |         |   |         |   |         |  |         |   |         |  |         |   |         |  |         |   |         |   |         |         |   |  |         |         |   |  |         |         |   |  |         |         |   |                                                                                                                                                                                                                                                                                                                                                                                                                                                                                                                                                                                                                                                                                                                                                                                                                                                                                                                                                                                                                                                                                                                      |  |  |  |           |  |  |                 |     |   |   |             |  |  |  |              |  |  |  |              |  |  |  |     |   |         |         |  |   |         |         |  |   |        |         |  |   |         |         |   |         |   |         |  |         |   |         |  |         |   |         |  |         |   |         |   |         |         |   |  |         |         |   |  |         |         |   |  |         |         |   |
|                                                                                                                                                                                                                                                                                                                                                                                                                                                                                                                                                                                                                                                                                                                                                                                                                                                                                                                                                                                                                                                                                                                    | 101.368 | 91.1407       | 0       |                                                                  |  |               |                 |                                                                  |           |     |             |           |     |   |              |                                                                                                                                                                                                                                                                        |  |  |              |       |  |               |     |   |           |         |   |           |         |         |           |                                                                                                                                                                                                                                                                        |         |         |  |       |        |               |   |         |           |         |   |           |     |         |           |         |   |         |  |         |   |         |   |         |         |   |  |         |         |   |  |         |         |   |  |         |         |   |                                                                                                                                                                                                                                                                                                                                                                                                                                                                                                                                                                                                                                                                                                                                                                                                                                                                                                                                                                                                                                                                                                                       |  |  |  |           |  |  |                 |     |   |   |             |  |  |  |              |  |  |  |              |  |  |  |     |   |         |         |  |   |         |         |  |   |         |         |  |   |         |         |   |         |   |         |  |         |   |         |  |         |   |         |  |         |   |         |   |         |         |   |  |         |         |   |  |         |         |   |  |         |         |   |                                                                                                                                                                                                                                                                                                                                                                                                                                                                                                                                                                                                                                                                                                                                                                                                                                                                                                                                                                                                                                                                                                                      |  |  |  |           |  |  |                 |     |   |   |             |  |  |  |              |  |  |  |              |  |  |  |     |   |         |         |  |   |         |         |  |   |        |         |  |   |         |         |   |         |   |         |  |         |   |         |  |         |   |         |  |         |   |         |   |         |         |   |  |         |         |   |  |         |         |   |  |         |         |   |
| <table border="1"> <thead> <tr><th>Level</th><th></th><th>Least Sq Mean</th></tr> </thead> <tbody> <tr><td>1</td><td>A</td><td>174.78121</td></tr> <tr><td>0.5</td><td>A</td><td>160.31719</td></tr> <tr><td>2</td><td>A</td><td>160.09321</td></tr> </tbody> </table>                                                                                                                                                                                                                                                                                                                                                                                                                                                                                                                                                                                                                                                                                                                                                                                                                                             |         |               |         | Level                                                            |  | Least Sq Mean | 1               | A                                                                | 174.78121 | 0.5 | A           | 160.31719 | 2   | A | 160.09321    | <table border="1"> <thead> <tr><th>Level</th><th></th><th>Least Sq Mean</th></tr> </thead> <tbody> <tr><td>2</td><td>A</td><td>350.47680</td></tr> <tr><td>1</td><td>A</td><td>338.22811</td></tr> <tr><td>0.5</td><td>A</td><td>327.50386</td></tr> </tbody> </table> |  |  |              | Level |  | Least Sq Mean | 2   | A | 350.47680 | 1       | A | 338.22811 | 0.5     | A       | 327.50386 | <table border="1"> <thead> <tr><th>Level</th><th></th><th>Least Sq Mean</th></tr> </thead> <tbody> <tr><td>2</td><td>A</td><td>422.71457</td></tr> <tr><td>1</td><td>B</td><td>369.21989</td></tr> <tr><td>0.5</td><td>B</td><td>361.33348</td></tr> </tbody> </table> |         |         |  | Level |        | Least Sq Mean | 2 | A       | 422.71457 | 1       | B | 369.21989 | 0.5 | B       | 361.33348 |         |   |         |  |         |   |         |   |         |         |   |  |         |         |   |  |         |         |   |  |         |         |   |                                                                                                                                                                                                                                                                                                                                                                                                                                                                                                                                                                                                                                                                                                                                                                                                                                                                                                                                                                                                                                                                                                                       |  |  |  |           |  |  |                 |     |   |   |             |  |  |  |              |  |  |  |              |  |  |  |     |   |         |         |  |   |         |         |  |   |         |         |  |   |         |         |   |         |   |         |  |         |   |         |  |         |   |         |  |         |   |         |   |         |         |   |  |         |         |   |  |         |         |   |  |         |         |   |                                                                                                                                                                                                                                                                                                                                                                                                                                                                                                                                                                                                                                                                                                                                                                                                                                                                                                                                                                                                                                                                                                                      |  |  |  |           |  |  |                 |     |   |   |             |  |  |  |              |  |  |  |              |  |  |  |     |   |         |         |  |   |         |         |  |   |        |         |  |   |         |         |   |         |   |         |  |         |   |         |  |         |   |         |  |         |   |         |   |         |         |   |  |         |         |   |  |         |         |   |  |         |         |   |
| Level                                                                                                                                                                                                                                                                                                                                                                                                                                                                                                                                                                                                                                                                                                                                                                                                                                                                                                                                                                                                                                                                                                              |         | Least Sq Mean |         |                                                                  |  |               |                 |                                                                  |           |     |             |           |     |   |              |                                                                                                                                                                                                                                                                        |  |  |              |       |  |               |     |   |           |         |   |           |         |         |           |                                                                                                                                                                                                                                                                        |         |         |  |       |        |               |   |         |           |         |   |           |     |         |           |         |   |         |  |         |   |         |   |         |         |   |  |         |         |   |  |         |         |   |  |         |         |   |                                                                                                                                                                                                                                                                                                                                                                                                                                                                                                                                                                                                                                                                                                                                                                                                                                                                                                                                                                                                                                                                                                                       |  |  |  |           |  |  |                 |     |   |   |             |  |  |  |              |  |  |  |              |  |  |  |     |   |         |         |  |   |         |         |  |   |         |         |  |   |         |         |   |         |   |         |  |         |   |         |  |         |   |         |  |         |   |         |   |         |         |   |  |         |         |   |  |         |         |   |  |         |         |   |                                                                                                                                                                                                                                                                                                                                                                                                                                                                                                                                                                                                                                                                                                                                                                                                                                                                                                                                                                                                                                                                                                                      |  |  |  |           |  |  |                 |     |   |   |             |  |  |  |              |  |  |  |              |  |  |  |     |   |         |         |  |   |         |         |  |   |        |         |  |   |         |         |   |         |   |         |  |         |   |         |  |         |   |         |  |         |   |         |   |         |         |   |  |         |         |   |  |         |         |   |  |         |         |   |
| 1                                                                                                                                                                                                                                                                                                                                                                                                                                                                                                                                                                                                                                                                                                                                                                                                                                                                                                                                                                                                                                                                                                                  | A       | 174.78121     |         |                                                                  |  |               |                 |                                                                  |           |     |             |           |     |   |              |                                                                                                                                                                                                                                                                        |  |  |              |       |  |               |     |   |           |         |   |           |         |         |           |                                                                                                                                                                                                                                                                        |         |         |  |       |        |               |   |         |           |         |   |           |     |         |           |         |   |         |  |         |   |         |   |         |         |   |  |         |         |   |  |         |         |   |  |         |         |   |                                                                                                                                                                                                                                                                                                                                                                                                                                                                                                                                                                                                                                                                                                                                                                                                                                                                                                                                                                                                                                                                                                                       |  |  |  |           |  |  |                 |     |   |   |             |  |  |  |              |  |  |  |              |  |  |  |     |   |         |         |  |   |         |         |  |   |         |         |  |   |         |         |   |         |   |         |  |         |   |         |  |         |   |         |  |         |   |         |   |         |         |   |  |         |         |   |  |         |         |   |  |         |         |   |                                                                                                                                                                                                                                                                                                                                                                                                                                                                                                                                                                                                                                                                                                                                                                                                                                                                                                                                                                                                                                                                                                                      |  |  |  |           |  |  |                 |     |   |   |             |  |  |  |              |  |  |  |              |  |  |  |     |   |         |         |  |   |         |         |  |   |        |         |  |   |         |         |   |         |   |         |  |         |   |         |  |         |   |         |  |         |   |         |   |         |         |   |  |         |         |   |  |         |         |   |  |         |         |   |
| 0.5                                                                                                                                                                                                                                                                                                                                                                                                                                                                                                                                                                                                                                                                                                                                                                                                                                                                                                                                                                                                                                                                                                                | A       | 160.31719     |         |                                                                  |  |               |                 |                                                                  |           |     |             |           |     |   |              |                                                                                                                                                                                                                                                                        |  |  |              |       |  |               |     |   |           |         |   |           |         |         |           |                                                                                                                                                                                                                                                                        |         |         |  |       |        |               |   |         |           |         |   |           |     |         |           |         |   |         |  |         |   |         |   |         |         |   |  |         |         |   |  |         |         |   |  |         |         |   |                                                                                                                                                                                                                                                                                                                                                                                                                                                                                                                                                                                                                                                                                                                                                                                                                                                                                                                                                                                                                                                                                                                       |  |  |  |           |  |  |                 |     |   |   |             |  |  |  |              |  |  |  |              |  |  |  |     |   |         |         |  |   |         |         |  |   |         |         |  |   |         |         |   |         |   |         |  |         |   |         |  |         |   |         |  |         |   |         |   |         |         |   |  |         |         |   |  |         |         |   |  |         |         |   |                                                                                                                                                                                                                                                                                                                                                                                                                                                                                                                                                                                                                                                                                                                                                                                                                                                                                                                                                                                                                                                                                                                      |  |  |  |           |  |  |                 |     |   |   |             |  |  |  |              |  |  |  |              |  |  |  |     |   |         |         |  |   |         |         |  |   |        |         |  |   |         |         |   |         |   |         |  |         |   |         |  |         |   |         |  |         |   |         |   |         |         |   |  |         |         |   |  |         |         |   |  |         |         |   |
| 2                                                                                                                                                                                                                                                                                                                                                                                                                                                                                                                                                                                                                                                                                                                                                                                                                                                                                                                                                                                                                                                                                                                  | A       | 160.09321     |         |                                                                  |  |               |                 |                                                                  |           |     |             |           |     |   |              |                                                                                                                                                                                                                                                                        |  |  |              |       |  |               |     |   |           |         |   |           |         |         |           |                                                                                                                                                                                                                                                                        |         |         |  |       |        |               |   |         |           |         |   |           |     |         |           |         |   |         |  |         |   |         |   |         |         |   |  |         |         |   |  |         |         |   |  |         |         |   |                                                                                                                                                                                                                                                                                                                                                                                                                                                                                                                                                                                                                                                                                                                                                                                                                                                                                                                                                                                                                                                                                                                       |  |  |  |           |  |  |                 |     |   |   |             |  |  |  |              |  |  |  |              |  |  |  |     |   |         |         |  |   |         |         |  |   |         |         |  |   |         |         |   |         |   |         |  |         |   |         |  |         |   |         |  |         |   |         |   |         |         |   |  |         |         |   |  |         |         |   |  |         |         |   |                                                                                                                                                                                                                                                                                                                                                                                                                                                                                                                                                                                                                                                                                                                                                                                                                                                                                                                                                                                                                                                                                                                      |  |  |  |           |  |  |                 |     |   |   |             |  |  |  |              |  |  |  |              |  |  |  |     |   |         |         |  |   |         |         |  |   |        |         |  |   |         |         |   |         |   |         |  |         |   |         |  |         |   |         |  |         |   |         |   |         |         |   |  |         |         |   |  |         |         |   |  |         |         |   |
| Level                                                                                                                                                                                                                                                                                                                                                                                                                                                                                                                                                                                                                                                                                                                                                                                                                                                                                                                                                                                                                                                                                                              |         | Least Sq Mean |         |                                                                  |  |               |                 |                                                                  |           |     |             |           |     |   |              |                                                                                                                                                                                                                                                                        |  |  |              |       |  |               |     |   |           |         |   |           |         |         |           |                                                                                                                                                                                                                                                                        |         |         |  |       |        |               |   |         |           |         |   |           |     |         |           |         |   |         |  |         |   |         |   |         |         |   |  |         |         |   |  |         |         |   |  |         |         |   |                                                                                                                                                                                                                                                                                                                                                                                                                                                                                                                                                                                                                                                                                                                                                                                                                                                                                                                                                                                                                                                                                                                       |  |  |  |           |  |  |                 |     |   |   |             |  |  |  |              |  |  |  |              |  |  |  |     |   |         |         |  |   |         |         |  |   |         |         |  |   |         |         |   |         |   |         |  |         |   |         |  |         |   |         |  |         |   |         |   |         |         |   |  |         |         |   |  |         |         |   |  |         |         |   |                                                                                                                                                                                                                                                                                                                                                                                                                                                                                                                                                                                                                                                                                                                                                                                                                                                                                                                                                                                                                                                                                                                      |  |  |  |           |  |  |                 |     |   |   |             |  |  |  |              |  |  |  |              |  |  |  |     |   |         |         |  |   |         |         |  |   |        |         |  |   |         |         |   |         |   |         |  |         |   |         |  |         |   |         |  |         |   |         |   |         |         |   |  |         |         |   |  |         |         |   |  |         |         |   |
| 2                                                                                                                                                                                                                                                                                                                                                                                                                                                                                                                                                                                                                                                                                                                                                                                                                                                                                                                                                                                                                                                                                                                  | A       | 350.47680     |         |                                                                  |  |               |                 |                                                                  |           |     |             |           |     |   |              |                                                                                                                                                                                                                                                                        |  |  |              |       |  |               |     |   |           |         |   |           |         |         |           |                                                                                                                                                                                                                                                                        |         |         |  |       |        |               |   |         |           |         |   |           |     |         |           |         |   |         |  |         |   |         |   |         |         |   |  |         |         |   |  |         |         |   |  |         |         |   |                                                                                                                                                                                                                                                                                                                                                                                                                                                                                                                                                                                                                                                                                                                                                                                                                                                                                                                                                                                                                                                                                                                       |  |  |  |           |  |  |                 |     |   |   |             |  |  |  |              |  |  |  |              |  |  |  |     |   |         |         |  |   |         |         |  |   |         |         |  |   |         |         |   |         |   |         |  |         |   |         |  |         |   |         |  |         |   |         |   |         |         |   |  |         |         |   |  |         |         |   |  |         |         |   |                                                                                                                                                                                                                                                                                                                                                                                                                                                                                                                                                                                                                                                                                                                                                                                                                                                                                                                                                                                                                                                                                                                      |  |  |  |           |  |  |                 |     |   |   |             |  |  |  |              |  |  |  |              |  |  |  |     |   |         |         |  |   |         |         |  |   |        |         |  |   |         |         |   |         |   |         |  |         |   |         |  |         |   |         |  |         |   |         |   |         |         |   |  |         |         |   |  |         |         |   |  |         |         |   |
| 1                                                                                                                                                                                                                                                                                                                                                                                                                                                                                                                                                                                                                                                                                                                                                                                                                                                                                                                                                                                                                                                                                                                  | A       | 338.22811     |         |                                                                  |  |               |                 |                                                                  |           |     |             |           |     |   |              |                                                                                                                                                                                                                                                                        |  |  |              |       |  |               |     |   |           |         |   |           |         |         |           |                                                                                                                                                                                                                                                                        |         |         |  |       |        |               |   |         |           |         |   |           |     |         |           |         |   |         |  |         |   |         |   |         |         |   |  |         |         |   |  |         |         |   |  |         |         |   |                                                                                                                                                                                                                                                                                                                                                                                                                                                                                                                                                                                                                                                                                                                                                                                                                                                                                                                                                                                                                                                                                                                       |  |  |  |           |  |  |                 |     |   |   |             |  |  |  |              |  |  |  |              |  |  |  |     |   |         |         |  |   |         |         |  |   |         |         |  |   |         |         |   |         |   |         |  |         |   |         |  |         |   |         |  |         |   |         |   |         |         |   |  |         |         |   |  |         |         |   |  |         |         |   |                                                                                                                                                                                                                                                                                                                                                                                                                                                                                                                                                                                                                                                                                                                                                                                                                                                                                                                                                                                                                                                                                                                      |  |  |  |           |  |  |                 |     |   |   |             |  |  |  |              |  |  |  |              |  |  |  |     |   |         |         |  |   |         |         |  |   |        |         |  |   |         |         |   |         |   |         |  |         |   |         |  |         |   |         |  |         |   |         |   |         |         |   |  |         |         |   |  |         |         |   |  |         |         |   |
| 0.5                                                                                                                                                                                                                                                                                                                                                                                                                                                                                                                                                                                                                                                                                                                                                                                                                                                                                                                                                                                                                                                                                                                | A       | 327.50386     |         |                                                                  |  |               |                 |                                                                  |           |     |             |           |     |   |              |                                                                                                                                                                                                                                                                        |  |  |              |       |  |               |     |   |           |         |   |           |         |         |           |                                                                                                                                                                                                                                                                        |         |         |  |       |        |               |   |         |           |         |   |           |     |         |           |         |   |         |  |         |   |         |   |         |         |   |  |         |         |   |  |         |         |   |  |         |         |   |                                                                                                                                                                                                                                                                                                                                                                                                                                                                                                                                                                                                                                                                                                                                                                                                                                                                                                                                                                                                                                                                                                                       |  |  |  |           |  |  |                 |     |   |   |             |  |  |  |              |  |  |  |              |  |  |  |     |   |         |         |  |   |         |         |  |   |         |         |  |   |         |         |   |         |   |         |  |         |   |         |  |         |   |         |  |         |   |         |   |         |         |   |  |         |         |   |  |         |         |   |  |         |         |   |                                                                                                                                                                                                                                                                                                                                                                                                                                                                                                                                                                                                                                                                                                                                                                                                                                                                                                                                                                                                                                                                                                                      |  |  |  |           |  |  |                 |     |   |   |             |  |  |  |              |  |  |  |              |  |  |  |     |   |         |         |  |   |         |         |  |   |        |         |  |   |         |         |   |         |   |         |  |         |   |         |  |         |   |         |  |         |   |         |   |         |         |   |  |         |         |   |  |         |         |   |  |         |         |   |
| Level                                                                                                                                                                                                                                                                                                                                                                                                                                                                                                                                                                                                                                                                                                                                                                                                                                                                                                                                                                                                                                                                                                              |         | Least Sq Mean |         |                                                                  |  |               |                 |                                                                  |           |     |             |           |     |   |              |                                                                                                                                                                                                                                                                        |  |  |              |       |  |               |     |   |           |         |   |           |         |         |           |                                                                                                                                                                                                                                                                        |         |         |  |       |        |               |   |         |           |         |   |           |     |         |           |         |   |         |  |         |   |         |   |         |         |   |  |         |         |   |  |         |         |   |  |         |         |   |                                                                                                                                                                                                                                                                                                                                                                                                                                                                                                                                                                                                                                                                                                                                                                                                                                                                                                                                                                                                                                                                                                                       |  |  |  |           |  |  |                 |     |   |   |             |  |  |  |              |  |  |  |              |  |  |  |     |   |         |         |  |   |         |         |  |   |         |         |  |   |         |         |   |         |   |         |  |         |   |         |  |         |   |         |  |         |   |         |   |         |         |   |  |         |         |   |  |         |         |   |  |         |         |   |                                                                                                                                                                                                                                                                                                                                                                                                                                                                                                                                                                                                                                                                                                                                                                                                                                                                                                                                                                                                                                                                                                                      |  |  |  |           |  |  |                 |     |   |   |             |  |  |  |              |  |  |  |              |  |  |  |     |   |         |         |  |   |         |         |  |   |        |         |  |   |         |         |   |         |   |         |  |         |   |         |  |         |   |         |  |         |   |         |   |         |         |   |  |         |         |   |  |         |         |   |  |         |         |   |
| 2                                                                                                                                                                                                                                                                                                                                                                                                                                                                                                                                                                                                                                                                                                                                                                                                                                                                                                                                                                                                                                                                                                                  | A       | 422.71457     |         |                                                                  |  |               |                 |                                                                  |           |     |             |           |     |   |              |                                                                                                                                                                                                                                                                        |  |  |              |       |  |               |     |   |           |         |   |           |         |         |           |                                                                                                                                                                                                                                                                        |         |         |  |       |        |               |   |         |           |         |   |           |     |         |           |         |   |         |  |         |   |         |   |         |         |   |  |         |         |   |  |         |         |   |  |         |         |   |                                                                                                                                                                                                                                                                                                                                                                                                                                                                                                                                                                                                                                                                                                                                                                                                                                                                                                                                                                                                                                                                                                                       |  |  |  |           |  |  |                 |     |   |   |             |  |  |  |              |  |  |  |              |  |  |  |     |   |         |         |  |   |         |         |  |   |         |         |  |   |         |         |   |         |   |         |  |         |   |         |  |         |   |         |  |         |   |         |   |         |         |   |  |         |         |   |  |         |         |   |  |         |         |   |                                                                                                                                                                                                                                                                                                                                                                                                                                                                                                                                                                                                                                                                                                                                                                                                                                                                                                                                                                                                                                                                                                                      |  |  |  |           |  |  |                 |     |   |   |             |  |  |  |              |  |  |  |              |  |  |  |     |   |         |         |  |   |         |         |  |   |        |         |  |   |         |         |   |         |   |         |  |         |   |         |  |         |   |         |  |         |   |         |   |         |         |   |  |         |         |   |  |         |         |   |  |         |         |   |
| 1                                                                                                                                                                                                                                                                                                                                                                                                                                                                                                                                                                                                                                                                                                                                                                                                                                                                                                                                                                                                                                                                                                                  | B       | 369.21989     |         |                                                                  |  |               |                 |                                                                  |           |     |             |           |     |   |              |                                                                                                                                                                                                                                                                        |  |  |              |       |  |               |     |   |           |         |   |           |         |         |           |                                                                                                                                                                                                                                                                        |         |         |  |       |        |               |   |         |           |         |   |           |     |         |           |         |   |         |  |         |   |         |   |         |         |   |  |         |         |   |  |         |         |   |  |         |         |   |                                                                                                                                                                                                                                                                                                                                                                                                                                                                                                                                                                                                                                                                                                                                                                                                                                                                                                                                                                                                                                                                                                                       |  |  |  |           |  |  |                 |     |   |   |             |  |  |  |              |  |  |  |              |  |  |  |     |   |         |         |  |   |         |         |  |   |         |         |  |   |         |         |   |         |   |         |  |         |   |         |  |         |   |         |  |         |   |         |   |         |         |   |  |         |         |   |  |         |         |   |  |         |         |   |                                                                                                                                                                                                                                                                                                                                                                                                                                                                                                                                                                                                                                                                                                                                                                                                                                                                                                                                                                                                                                                                                                                      |  |  |  |           |  |  |                 |     |   |   |             |  |  |  |              |  |  |  |              |  |  |  |     |   |         |         |  |   |         |         |  |   |        |         |  |   |         |         |   |         |   |         |  |         |   |         |  |         |   |         |  |         |   |         |   |         |         |   |  |         |         |   |  |         |         |   |  |         |         |   |
| 0.5                                                                                                                                                                                                                                                                                                                                                                                                                                                                                                                                                                                                                                                                                                                                                                                                                                                                                                                                                                                                                                                                                                                | B       | 361.33348     |         |                                                                  |  |               |                 |                                                                  |           |     |             |           |     |   |              |                                                                                                                                                                                                                                                                        |  |  |              |       |  |               |     |   |           |         |   |           |         |         |           |                                                                                                                                                                                                                                                                        |         |         |  |       |        |               |   |         |           |         |   |           |     |         |           |         |   |         |  |         |   |         |   |         |         |   |  |         |         |   |  |         |         |   |  |         |         |   |                                                                                                                                                                                                                                                                                                                                                                                                                                                                                                                                                                                                                                                                                                                                                                                                                                                                                                                                                                                                                                                                                                                       |  |  |  |           |  |  |                 |     |   |   |             |  |  |  |              |  |  |  |              |  |  |  |     |   |         |         |  |   |         |         |  |   |         |         |  |   |         |         |   |         |   |         |  |         |   |         |  |         |   |         |  |         |   |         |   |         |         |   |  |         |         |   |  |         |         |   |  |         |         |   |                                                                                                                                                                                                                                                                                                                                                                                                                                                                                                                                                                                                                                                                                                                                                                                                                                                                                                                                                                                                                                                                                                                      |  |  |  |           |  |  |                 |     |   |   |             |  |  |  |              |  |  |  |              |  |  |  |     |   |         |         |  |   |         |         |  |   |        |         |  |   |         |         |   |         |   |         |  |         |   |         |  |         |   |         |  |         |   |         |   |         |         |   |  |         |         |   |  |         |         |   |  |         |         |   |
| Levels not connected by same letter are significantly different.                                                                                                                                                                                                                                                                                                                                                                                                                                                                                                                                                                                                                                                                                                                                                                                                                                                                                                                                                                                                                                                   |         |               |         | Levels not connected by same letter are significantly different. |  |               |                 | Levels not connected by same letter are significantly different. |           |     |             |           |     |   |              |                                                                                                                                                                                                                                                                        |  |  |              |       |  |               |     |   |           |         |   |           |         |         |           |                                                                                                                                                                                                                                                                        |         |         |  |       |        |               |   |         |           |         |   |           |     |         |           |         |   |         |  |         |   |         |   |         |         |   |  |         |         |   |  |         |         |   |  |         |         |   |                                                                                                                                                                                                                                                                                                                                                                                                                                                                                                                                                                                                                                                                                                                                                                                                                                                                                                                                                                                                                                                                                                                       |  |  |  |           |  |  |                 |     |   |   |             |  |  |  |              |  |  |  |              |  |  |  |     |   |         |         |  |   |         |         |  |   |         |         |  |   |         |         |   |         |   |         |  |         |   |         |  |         |   |         |  |         |   |         |   |         |         |   |  |         |         |   |  |         |         |   |  |         |         |   |                                                                                                                                                                                                                                                                                                                                                                                                                                                                                                                                                                                                                                                                                                                                                                                                                                                                                                                                                                                                                                                                                                                      |  |  |  |           |  |  |                 |     |   |   |             |  |  |  |              |  |  |  |              |  |  |  |     |   |         |         |  |   |         |         |  |   |        |         |  |   |         |         |   |         |   |         |  |         |   |         |  |         |   |         |  |         |   |         |   |         |         |   |  |         |         |   |  |         |         |   |  |         |         |   |
| Aq-FI                                                                                                                                                                                                                                                                                                                                                                                                                                                                                                                                                                                                                                                                                                                                                                                                                                                                                                                                                                                                                                                                                                              |         |               |         | Dc-FI                                                            |  |               |                 |                                                                  |           |     |             |           |     |   |              |                                                                                                                                                                                                                                                                        |  |  |              |       |  |               |     |   |           |         |   |           |         |         |           |                                                                                                                                                                                                                                                                        |         |         |  |       |        |               |   |         |           |         |   |           |     |         |           |         |   |         |  |         |   |         |   |         |         |   |  |         |         |   |  |         |         |   |  |         |         |   |                                                                                                                                                                                                                                                                                                                                                                                                                                                                                                                                                                                                                                                                                                                                                                                                                                                                                                                                                                                                                                                                                                                       |  |  |  |           |  |  |                 |     |   |   |             |  |  |  |              |  |  |  |              |  |  |  |     |   |         |         |  |   |         |         |  |   |         |         |  |   |         |         |   |         |   |         |  |         |   |         |  |         |   |         |  |         |   |         |   |         |         |   |  |         |         |   |  |         |         |   |  |         |         |   |                                                                                                                                                                                                                                                                                                                                                                                                                                                                                                                                                                                                                                                                                                                                                                                                                                                                                                                                                                                                                                                                                                                      |  |  |  |           |  |  |                 |     |   |   |             |  |  |  |              |  |  |  |              |  |  |  |     |   |         |         |  |   |         |         |  |   |        |         |  |   |         |         |   |         |   |         |  |         |   |         |  |         |   |         |  |         |   |         |   |         |         |   |  |         |         |   |  |         |         |   |  |         |         |   |
| LSMeans Differences Tukey HSD                                                                                                                                                                                                                                                                                                                                                                                                                                                                                                                                                                                                                                                                                                                                                                                                                                                                                                                                                                                                                                                                                      |         |               |         | LSMeans Differences Tukey HSD                                    |  |               |                 |                                                                  |           |     |             |           |     |   |              |                                                                                                                                                                                                                                                                        |  |  |              |       |  |               |     |   |           |         |   |           |         |         |           |                                                                                                                                                                                                                                                                        |         |         |  |       |        |               |   |         |           |         |   |           |     |         |           |         |   |         |  |         |   |         |   |         |         |   |  |         |         |   |  |         |         |   |  |         |         |   |                                                                                                                                                                                                                                                                                                                                                                                                                                                                                                                                                                                                                                                                                                                                                                                                                                                                                                                                                                                                                                                                                                                       |  |  |  |           |  |  |                 |     |   |   |             |  |  |  |              |  |  |  |              |  |  |  |     |   |         |         |  |   |         |         |  |   |         |         |  |   |         |         |   |         |   |         |  |         |   |         |  |         |   |         |  |         |   |         |   |         |         |   |  |         |         |   |  |         |         |   |  |         |         |   |                                                                                                                                                                                                                                                                                                                                                                                                                                                                                                                                                                                                                                                                                                                                                                                                                                                                                                                                                                                                                                                                                                                      |  |  |  |           |  |  |                 |     |   |   |             |  |  |  |              |  |  |  |              |  |  |  |     |   |         |         |  |   |         |         |  |   |        |         |  |   |         |         |   |         |   |         |  |         |   |         |  |         |   |         |  |         |   |         |   |         |         |   |  |         |         |   |  |         |         |   |  |         |         |   |
| α= 0.050 Q= 2.64044                                                                                                                                                                                                                                                                                                                                                                                                                                                                                                                                                                                                                                                                                                                                                                                                                                                                                                                                                                                                                                                                                                |         |               |         | α= 0.050 Q= 2.64044                                              |  |               |                 |                                                                  |           |     |             |           |     |   |              |                                                                                                                                                                                                                                                                        |  |  |              |       |  |               |     |   |           |         |   |           |         |         |           |                                                                                                                                                                                                                                                                        |         |         |  |       |        |               |   |         |           |         |   |           |     |         |           |         |   |         |  |         |   |         |   |         |         |   |  |         |         |   |  |         |         |   |  |         |         |   |                                                                                                                                                                                                                                                                                                                                                                                                                                                                                                                                                                                                                                                                                                                                                                                                                                                                                                                                                                                                                                                                                                                       |  |  |  |           |  |  |                 |     |   |   |             |  |  |  |              |  |  |  |              |  |  |  |     |   |         |         |  |   |         |         |  |   |         |         |  |   |         |         |   |         |   |         |  |         |   |         |  |         |   |         |  |         |   |         |   |         |         |   |  |         |         |   |  |         |         |   |  |         |         |   |                                                                                                                                                                                                                                                                                                                                                                                                                                                                                                                                                                                                                                                                                                                                                                                                                                                                                                                                                                                                                                                                                                                      |  |  |  |           |  |  |                 |     |   |   |             |  |  |  |              |  |  |  |              |  |  |  |     |   |         |         |  |   |         |         |  |   |        |         |  |   |         |         |   |         |   |         |  |         |   |         |  |         |   |         |  |         |   |         |   |         |         |   |  |         |         |   |  |         |         |   |  |         |         |   |
| <table border="1"> <thead> <tr><th colspan="3">LSMean[j]</th></tr> <tr><th>Mean[j]-Mean[j]</th><th>0.5</th><th>1</th><th>2</th></tr> <tr><th>Std Err Dif</th><td></td><td></td><td></td></tr> <tr><th>Lower CL Dif</th><td></td><td></td><td></td></tr> <tr><th>Upper CL Dif</th><td></td><td></td><td></td></tr> </thead> <tbody> <tr><td>0.5</td><td>0</td><td>-24.54</td><td>-119.19</td></tr> <tr><td></td><td>0</td><td>23.5337</td><td>24.5801</td></tr> <tr><td></td><td>0</td><td>-86.679</td><td>-184.09</td></tr> <tr><td></td><td>0</td><td>37.599</td><td>-54.289</td></tr> <tr><td>1</td><td>24.5402</td><td>0</td><td>-94.651</td></tr> <tr><td></td><td>23.5337</td><td>0</td><td>23.5337</td></tr> <tr><td></td><td>-37.599</td><td>0</td><td>-156.79</td></tr> <tr><td></td><td>86.6793</td><td>0</td><td>-32.512</td></tr> <tr><td>2</td><td>119.191</td><td>94.6513</td><td>0</td></tr> <tr><td></td><td>24.5801</td><td>23.5337</td><td>0</td></tr> <tr><td></td><td>54.2893</td><td>32.5122</td><td>0</td></tr> <tr><td></td><td>184.094</td><td>156.79</td><td>0</td></tr> </tbody> </table> |         |               |         | LSMean[j]                                                        |  |               | Mean[j]-Mean[j] | 0.5                                                              | 1         | 2   | Std Err Dif |           |     |   | Lower CL Dif |                                                                                                                                                                                                                                                                        |  |  | Upper CL Dif |       |  |               | 0.5 | 0 | -24.54    | -119.19 |   | 0         | 23.5337 | 24.5801 |           | 0                                                                                                                                                                                                                                                                      | -86.679 | -184.09 |  | 0     | 37.599 | -54.289       | 1 | 24.5402 | 0         | -94.651 |   | 23.5337   | 0   | 23.5337 |           | -37.599 | 0 | -156.79 |  | 86.6793 | 0 | -32.512 | 2 | 119.191 | 94.6513 | 0 |  | 24.5801 | 23.5337 | 0 |  | 54.2893 | 32.5122 | 0 |  | 184.094 | 156.79  | 0 | <table border="1"> <thead> <tr><th colspan="3">LSMean[j]</th></tr> <tr><th>Mean[j]-Mean[j]</th><th>0.5</th><th>1</th><th>2</th></tr> <tr><th>Std Err Dif</th><td></td><td></td><td></td></tr> <tr><th>Lower CL Dif</th><td></td><td></td><td></td></tr> <tr><th>Upper CL Dif</th><td></td><td></td><td></td></tr> </thead> <tbody> <tr><td>0.5</td><td>0</td><td>-33.695</td><td>-99.458</td></tr> <tr><td></td><td>0</td><td>41.6158</td><td>41.6158</td></tr> <tr><td></td><td>0</td><td>-143.58</td><td>-209.34</td></tr> <tr><td></td><td>0</td><td>76.1892</td><td>10.4257</td></tr> <tr><td>1</td><td>33.6949</td><td>0</td><td>-65.764</td></tr> <tr><td></td><td>41.6158</td><td>0</td><td>43.4663</td></tr> <tr><td></td><td>-76.189</td><td>0</td><td>-180.53</td></tr> <tr><td></td><td>143.579</td><td>0</td><td>49.0066</td></tr> <tr><td>2</td><td>99.4584</td><td>65.7635</td><td>0</td></tr> <tr><td></td><td>41.6158</td><td>43.4663</td><td>0</td></tr> <tr><td></td><td>-10.426</td><td>-49.007</td><td>0</td></tr> <tr><td></td><td>209.342</td><td>180.534</td><td>0</td></tr> </tbody> </table> |  |  |  | LSMean[j] |  |  | Mean[j]-Mean[j] | 0.5 | 1 | 2 | Std Err Dif |  |  |  | Lower CL Dif |  |  |  | Upper CL Dif |  |  |  | 0.5 | 0 | -33.695 | -99.458 |  | 0 | 41.6158 | 41.6158 |  | 0 | -143.58 | -209.34 |  | 0 | 76.1892 | 10.4257 | 1 | 33.6949 | 0 | -65.764 |  | 41.6158 | 0 | 43.4663 |  | -76.189 | 0 | -180.53 |  | 143.579 | 0 | 49.0066 | 2 | 99.4584 | 65.7635 | 0 |  | 41.6158 | 43.4663 | 0 |  | -10.426 | -49.007 | 0 |  | 209.342 | 180.534 | 0 |                                                                                                                                                                                                                                                                                                                                                                                                                                                                                                                                                                                                                                                                                                                                                                                                                                                                                                                                                                                                                                                                                                                      |  |  |  |           |  |  |                 |     |   |   |             |  |  |  |              |  |  |  |              |  |  |  |     |   |         |         |  |   |         |         |  |   |        |         |  |   |         |         |   |         |   |         |  |         |   |         |  |         |   |         |  |         |   |         |   |         |         |   |  |         |         |   |  |         |         |   |  |         |         |   |
| LSMean[j]                                                                                                                                                                                                                                                                                                                                                                                                                                                                                                                                                                                                                                                                                                                                                                                                                                                                                                                                                                                                                                                                                                          |         |               |         |                                                                  |  |               |                 |                                                                  |           |     |             |           |     |   |              |                                                                                                                                                                                                                                                                        |  |  |              |       |  |               |     |   |           |         |   |           |         |         |           |                                                                                                                                                                                                                                                                        |         |         |  |       |        |               |   |         |           |         |   |           |     |         |           |         |   |         |  |         |   |         |   |         |         |   |  |         |         |   |  |         |         |   |  |         |         |   |                                                                                                                                                                                                                                                                                                                                                                                                                                                                                                                                                                                                                                                                                                                                                                                                                                                                                                                                                                                                                                                                                                                       |  |  |  |           |  |  |                 |     |   |   |             |  |  |  |              |  |  |  |              |  |  |  |     |   |         |         |  |   |         |         |  |   |         |         |  |   |         |         |   |         |   |         |  |         |   |         |  |         |   |         |  |         |   |         |   |         |         |   |  |         |         |   |  |         |         |   |  |         |         |   |                                                                                                                                                                                                                                                                                                                                                                                                                                                                                                                                                                                                                                                                                                                                                                                                                                                                                                                                                                                                                                                                                                                      |  |  |  |           |  |  |                 |     |   |   |             |  |  |  |              |  |  |  |              |  |  |  |     |   |         |         |  |   |         |         |  |   |        |         |  |   |         |         |   |         |   |         |  |         |   |         |  |         |   |         |  |         |   |         |   |         |         |   |  |         |         |   |  |         |         |   |  |         |         |   |
| Mean[j]-Mean[j]                                                                                                                                                                                                                                                                                                                                                                                                                                                                                                                                                                                                                                                                                                                                                                                                                                                                                                                                                                                                                                                                                                    | 0.5     | 1             | 2       |                                                                  |  |               |                 |                                                                  |           |     |             |           |     |   |              |                                                                                                                                                                                                                                                                        |  |  |              |       |  |               |     |   |           |         |   |           |         |         |           |                                                                                                                                                                                                                                                                        |         |         |  |       |        |               |   |         |           |         |   |           |     |         |           |         |   |         |  |         |   |         |   |         |         |   |  |         |         |   |  |         |         |   |  |         |         |   |                                                                                                                                                                                                                                                                                                                                                                                                                                                                                                                                                                                                                                                                                                                                                                                                                                                                                                                                                                                                                                                                                                                       |  |  |  |           |  |  |                 |     |   |   |             |  |  |  |              |  |  |  |              |  |  |  |     |   |         |         |  |   |         |         |  |   |         |         |  |   |         |         |   |         |   |         |  |         |   |         |  |         |   |         |  |         |   |         |   |         |         |   |  |         |         |   |  |         |         |   |  |         |         |   |                                                                                                                                                                                                                                                                                                                                                                                                                                                                                                                                                                                                                                                                                                                                                                                                                                                                                                                                                                                                                                                                                                                      |  |  |  |           |  |  |                 |     |   |   |             |  |  |  |              |  |  |  |              |  |  |  |     |   |         |         |  |   |         |         |  |   |        |         |  |   |         |         |   |         |   |         |  |         |   |         |  |         |   |         |  |         |   |         |   |         |         |   |  |         |         |   |  |         |         |   |  |         |         |   |
| Std Err Dif                                                                                                                                                                                                                                                                                                                                                                                                                                                                                                                                                                                                                                                                                                                                                                                                                                                                                                                                                                                                                                                                                                        |         |               |         |                                                                  |  |               |                 |                                                                  |           |     |             |           |     |   |              |                                                                                                                                                                                                                                                                        |  |  |              |       |  |               |     |   |           |         |   |           |         |         |           |                                                                                                                                                                                                                                                                        |         |         |  |       |        |               |   |         |           |         |   |           |     |         |           |         |   |         |  |         |   |         |   |         |         |   |  |         |         |   |  |         |         |   |  |         |         |   |                                                                                                                                                                                                                                                                                                                                                                                                                                                                                                                                                                                                                                                                                                                                                                                                                                                                                                                                                                                                                                                                                                                       |  |  |  |           |  |  |                 |     |   |   |             |  |  |  |              |  |  |  |              |  |  |  |     |   |         |         |  |   |         |         |  |   |         |         |  |   |         |         |   |         |   |         |  |         |   |         |  |         |   |         |  |         |   |         |   |         |         |   |  |         |         |   |  |         |         |   |  |         |         |   |                                                                                                                                                                                                                                                                                                                                                                                                                                                                                                                                                                                                                                                                                                                                                                                                                                                                                                                                                                                                                                                                                                                      |  |  |  |           |  |  |                 |     |   |   |             |  |  |  |              |  |  |  |              |  |  |  |     |   |         |         |  |   |         |         |  |   |        |         |  |   |         |         |   |         |   |         |  |         |   |         |  |         |   |         |  |         |   |         |   |         |         |   |  |         |         |   |  |         |         |   |  |         |         |   |
| Lower CL Dif                                                                                                                                                                                                                                                                                                                                                                                                                                                                                                                                                                                                                                                                                                                                                                                                                                                                                                                                                                                                                                                                                                       |         |               |         |                                                                  |  |               |                 |                                                                  |           |     |             |           |     |   |              |                                                                                                                                                                                                                                                                        |  |  |              |       |  |               |     |   |           |         |   |           |         |         |           |                                                                                                                                                                                                                                                                        |         |         |  |       |        |               |   |         |           |         |   |           |     |         |           |         |   |         |  |         |   |         |   |         |         |   |  |         |         |   |  |         |         |   |  |         |         |   |                                                                                                                                                                                                                                                                                                                                                                                                                                                                                                                                                                                                                                                                                                                                                                                                                                                                                                                                                                                                                                                                                                                       |  |  |  |           |  |  |                 |     |   |   |             |  |  |  |              |  |  |  |              |  |  |  |     |   |         |         |  |   |         |         |  |   |         |         |  |   |         |         |   |         |   |         |  |         |   |         |  |         |   |         |  |         |   |         |   |         |         |   |  |         |         |   |  |         |         |   |  |         |         |   |                                                                                                                                                                                                                                                                                                                                                                                                                                                                                                                                                                                                                                                                                                                                                                                                                                                                                                                                                                                                                                                                                                                      |  |  |  |           |  |  |                 |     |   |   |             |  |  |  |              |  |  |  |              |  |  |  |     |   |         |         |  |   |         |         |  |   |        |         |  |   |         |         |   |         |   |         |  |         |   |         |  |         |   |         |  |         |   |         |   |         |         |   |  |         |         |   |  |         |         |   |  |         |         |   |
| Upper CL Dif                                                                                                                                                                                                                                                                                                                                                                                                                                                                                                                                                                                                                                                                                                                                                                                                                                                                                                                                                                                                                                                                                                       |         |               |         |                                                                  |  |               |                 |                                                                  |           |     |             |           |     |   |              |                                                                                                                                                                                                                                                                        |  |  |              |       |  |               |     |   |           |         |   |           |         |         |           |                                                                                                                                                                                                                                                                        |         |         |  |       |        |               |   |         |           |         |   |           |     |         |           |         |   |         |  |         |   |         |   |         |         |   |  |         |         |   |  |         |         |   |  |         |         |   |                                                                                                                                                                                                                                                                                                                                                                                                                                                                                                                                                                                                                                                                                                                                                                                                                                                                                                                                                                                                                                                                                                                       |  |  |  |           |  |  |                 |     |   |   |             |  |  |  |              |  |  |  |              |  |  |  |     |   |         |         |  |   |         |         |  |   |         |         |  |   |         |         |   |         |   |         |  |         |   |         |  |         |   |         |  |         |   |         |   |         |         |   |  |         |         |   |  |         |         |   |  |         |         |   |                                                                                                                                                                                                                                                                                                                                                                                                                                                                                                                                                                                                                                                                                                                                                                                                                                                                                                                                                                                                                                                                                                                      |  |  |  |           |  |  |                 |     |   |   |             |  |  |  |              |  |  |  |              |  |  |  |     |   |         |         |  |   |         |         |  |   |        |         |  |   |         |         |   |         |   |         |  |         |   |         |  |         |   |         |  |         |   |         |   |         |         |   |  |         |         |   |  |         |         |   |  |         |         |   |
| 0.5                                                                                                                                                                                                                                                                                                                                                                                                                                                                                                                                                                                                                                                                                                                                                                                                                                                                                                                                                                                                                                                                                                                | 0       | -24.54        | -119.19 |                                                                  |  |               |                 |                                                                  |           |     |             |           |     |   |              |                                                                                                                                                                                                                                                                        |  |  |              |       |  |               |     |   |           |         |   |           |         |         |           |                                                                                                                                                                                                                                                                        |         |         |  |       |        |               |   |         |           |         |   |           |     |         |           |         |   |         |  |         |   |         |   |         |         |   |  |         |         |   |  |         |         |   |  |         |         |   |                                                                                                                                                                                                                                                                                                                                                                                                                                                                                                                                                                                                                                                                                                                                                                                                                                                                                                                                                                                                                                                                                                                       |  |  |  |           |  |  |                 |     |   |   |             |  |  |  |              |  |  |  |              |  |  |  |     |   |         |         |  |   |         |         |  |   |         |         |  |   |         |         |   |         |   |         |  |         |   |         |  |         |   |         |  |         |   |         |   |         |         |   |  |         |         |   |  |         |         |   |  |         |         |   |                                                                                                                                                                                                                                                                                                                                                                                                                                                                                                                                                                                                                                                                                                                                                                                                                                                                                                                                                                                                                                                                                                                      |  |  |  |           |  |  |                 |     |   |   |             |  |  |  |              |  |  |  |              |  |  |  |     |   |         |         |  |   |         |         |  |   |        |         |  |   |         |         |   |         |   |         |  |         |   |         |  |         |   |         |  |         |   |         |   |         |         |   |  |         |         |   |  |         |         |   |  |         |         |   |
|                                                                                                                                                                                                                                                                                                                                                                                                                                                                                                                                                                                                                                                                                                                                                                                                                                                                                                                                                                                                                                                                                                                    | 0       | 23.5337       | 24.5801 |                                                                  |  |               |                 |                                                                  |           |     |             |           |     |   |              |                                                                                                                                                                                                                                                                        |  |  |              |       |  |               |     |   |           |         |   |           |         |         |           |                                                                                                                                                                                                                                                                        |         |         |  |       |        |               |   |         |           |         |   |           |     |         |           |         |   |         |  |         |   |         |   |         |         |   |  |         |         |   |  |         |         |   |  |         |         |   |                                                                                                                                                                                                                                                                                                                                                                                                                                                                                                                                                                                                                                                                                                                                                                                                                                                                                                                                                                                                                                                                                                                       |  |  |  |           |  |  |                 |     |   |   |             |  |  |  |              |  |  |  |              |  |  |  |     |   |         |         |  |   |         |         |  |   |         |         |  |   |         |         |   |         |   |         |  |         |   |         |  |         |   |         |  |         |   |         |   |         |         |   |  |         |         |   |  |         |         |   |  |         |         |   |                                                                                                                                                                                                                                                                                                                                                                                                                                                                                                                                                                                                                                                                                                                                                                                                                                                                                                                                                                                                                                                                                                                      |  |  |  |           |  |  |                 |     |   |   |             |  |  |  |              |  |  |  |              |  |  |  |     |   |         |         |  |   |         |         |  |   |        |         |  |   |         |         |   |         |   |         |  |         |   |         |  |         |   |         |  |         |   |         |   |         |         |   |  |         |         |   |  |         |         |   |  |         |         |   |
|                                                                                                                                                                                                                                                                                                                                                                                                                                                                                                                                                                                                                                                                                                                                                                                                                                                                                                                                                                                                                                                                                                                    | 0       | -86.679       | -184.09 |                                                                  |  |               |                 |                                                                  |           |     |             |           |     |   |              |                                                                                                                                                                                                                                                                        |  |  |              |       |  |               |     |   |           |         |   |           |         |         |           |                                                                                                                                                                                                                                                                        |         |         |  |       |        |               |   |         |           |         |   |           |     |         |           |         |   |         |  |         |   |         |   |         |         |   |  |         |         |   |  |         |         |   |  |         |         |   |                                                                                                                                                                                                                                                                                                                                                                                                                                                                                                                                                                                                                                                                                                                                                                                                                                                                                                                                                                                                                                                                                                                       |  |  |  |           |  |  |                 |     |   |   |             |  |  |  |              |  |  |  |              |  |  |  |     |   |         |         |  |   |         |         |  |   |         |         |  |   |         |         |   |         |   |         |  |         |   |         |  |         |   |         |  |         |   |         |   |         |         |   |  |         |         |   |  |         |         |   |  |         |         |   |                                                                                                                                                                                                                                                                                                                                                                                                                                                                                                                                                                                                                                                                                                                                                                                                                                                                                                                                                                                                                                                                                                                      |  |  |  |           |  |  |                 |     |   |   |             |  |  |  |              |  |  |  |              |  |  |  |     |   |         |         |  |   |         |         |  |   |        |         |  |   |         |         |   |         |   |         |  |         |   |         |  |         |   |         |  |         |   |         |   |         |         |   |  |         |         |   |  |         |         |   |  |         |         |   |
|                                                                                                                                                                                                                                                                                                                                                                                                                                                                                                                                                                                                                                                                                                                                                                                                                                                                                                                                                                                                                                                                                                                    | 0       | 37.599        | -54.289 |                                                                  |  |               |                 |                                                                  |           |     |             |           |     |   |              |                                                                                                                                                                                                                                                                        |  |  |              |       |  |               |     |   |           |         |   |           |         |         |           |                                                                                                                                                                                                                                                                        |         |         |  |       |        |               |   |         |           |         |   |           |     |         |           |         |   |         |  |         |   |         |   |         |         |   |  |         |         |   |  |         |         |   |  |         |         |   |                                                                                                                                                                                                                                                                                                                                                                                                                                                                                                                                                                                                                                                                                                                                                                                                                                                                                                                                                                                                                                                                                                                       |  |  |  |           |  |  |                 |     |   |   |             |  |  |  |              |  |  |  |              |  |  |  |     |   |         |         |  |   |         |         |  |   |         |         |  |   |         |         |   |         |   |         |  |         |   |         |  |         |   |         |  |         |   |         |   |         |         |   |  |         |         |   |  |         |         |   |  |         |         |   |                                                                                                                                                                                                                                                                                                                                                                                                                                                                                                                                                                                                                                                                                                                                                                                                                                                                                                                                                                                                                                                                                                                      |  |  |  |           |  |  |                 |     |   |   |             |  |  |  |              |  |  |  |              |  |  |  |     |   |         |         |  |   |         |         |  |   |        |         |  |   |         |         |   |         |   |         |  |         |   |         |  |         |   |         |  |         |   |         |   |         |         |   |  |         |         |   |  |         |         |   |  |         |         |   |
| 1                                                                                                                                                                                                                                                                                                                                                                                                                                                                                                                                                                                                                                                                                                                                                                                                                                                                                                                                                                                                                                                                                                                  | 24.5402 | 0             | -94.651 |                                                                  |  |               |                 |                                                                  |           |     |             |           |     |   |              |                                                                                                                                                                                                                                                                        |  |  |              |       |  |               |     |   |           |         |   |           |         |         |           |                                                                                                                                                                                                                                                                        |         |         |  |       |        |               |   |         |           |         |   |           |     |         |           |         |   |         |  |         |   |         |   |         |         |   |  |         |         |   |  |         |         |   |  |         |         |   |                                                                                                                                                                                                                                                                                                                                                                                                                                                                                                                                                                                                                                                                                                                                                                                                                                                                                                                                                                                                                                                                                                                       |  |  |  |           |  |  |                 |     |   |   |             |  |  |  |              |  |  |  |              |  |  |  |     |   |         |         |  |   |         |         |  |   |         |         |  |   |         |         |   |         |   |         |  |         |   |         |  |         |   |         |  |         |   |         |   |         |         |   |  |         |         |   |  |         |         |   |  |         |         |   |                                                                                                                                                                                                                                                                                                                                                                                                                                                                                                                                                                                                                                                                                                                                                                                                                                                                                                                                                                                                                                                                                                                      |  |  |  |           |  |  |                 |     |   |   |             |  |  |  |              |  |  |  |              |  |  |  |     |   |         |         |  |   |         |         |  |   |        |         |  |   |         |         |   |         |   |         |  |         |   |         |  |         |   |         |  |         |   |         |   |         |         |   |  |         |         |   |  |         |         |   |  |         |         |   |
|                                                                                                                                                                                                                                                                                                                                                                                                                                                                                                                                                                                                                                                                                                                                                                                                                                                                                                                                                                                                                                                                                                                    | 23.5337 | 0             | 23.5337 |                                                                  |  |               |                 |                                                                  |           |     |             |           |     |   |              |                                                                                                                                                                                                                                                                        |  |  |              |       |  |               |     |   |           |         |   |           |         |         |           |                                                                                                                                                                                                                                                                        |         |         |  |       |        |               |   |         |           |         |   |           |     |         |           |         |   |         |  |         |   |         |   |         |         |   |  |         |         |   |  |         |         |   |  |         |         |   |                                                                                                                                                                                                                                                                                                                                                                                                                                                                                                                                                                                                                                                                                                                                                                                                                                                                                                                                                                                                                                                                                                                       |  |  |  |           |  |  |                 |     |   |   |             |  |  |  |              |  |  |  |              |  |  |  |     |   |         |         |  |   |         |         |  |   |         |         |  |   |         |         |   |         |   |         |  |         |   |         |  |         |   |         |  |         |   |         |   |         |         |   |  |         |         |   |  |         |         |   |  |         |         |   |                                                                                                                                                                                                                                                                                                                                                                                                                                                                                                                                                                                                                                                                                                                                                                                                                                                                                                                                                                                                                                                                                                                      |  |  |  |           |  |  |                 |     |   |   |             |  |  |  |              |  |  |  |              |  |  |  |     |   |         |         |  |   |         |         |  |   |        |         |  |   |         |         |   |         |   |         |  |         |   |         |  |         |   |         |  |         |   |         |   |         |         |   |  |         |         |   |  |         |         |   |  |         |         |   |
|                                                                                                                                                                                                                                                                                                                                                                                                                                                                                                                                                                                                                                                                                                                                                                                                                                                                                                                                                                                                                                                                                                                    | -37.599 | 0             | -156.79 |                                                                  |  |               |                 |                                                                  |           |     |             |           |     |   |              |                                                                                                                                                                                                                                                                        |  |  |              |       |  |               |     |   |           |         |   |           |         |         |           |                                                                                                                                                                                                                                                                        |         |         |  |       |        |               |   |         |           |         |   |           |     |         |           |         |   |         |  |         |   |         |   |         |         |   |  |         |         |   |  |         |         |   |  |         |         |   |                                                                                                                                                                                                                                                                                                                                                                                                                                                                                                                                                                                                                                                                                                                                                                                                                                                                                                                                                                                                                                                                                                                       |  |  |  |           |  |  |                 |     |   |   |             |  |  |  |              |  |  |  |              |  |  |  |     |   |         |         |  |   |         |         |  |   |         |         |  |   |         |         |   |         |   |         |  |         |   |         |  |         |   |         |  |         |   |         |   |         |         |   |  |         |         |   |  |         |         |   |  |         |         |   |                                                                                                                                                                                                                                                                                                                                                                                                                                                                                                                                                                                                                                                                                                                                                                                                                                                                                                                                                                                                                                                                                                                      |  |  |  |           |  |  |                 |     |   |   |             |  |  |  |              |  |  |  |              |  |  |  |     |   |         |         |  |   |         |         |  |   |        |         |  |   |         |         |   |         |   |         |  |         |   |         |  |         |   |         |  |         |   |         |   |         |         |   |  |         |         |   |  |         |         |   |  |         |         |   |
|                                                                                                                                                                                                                                                                                                                                                                                                                                                                                                                                                                                                                                                                                                                                                                                                                                                                                                                                                                                                                                                                                                                    | 86.6793 | 0             | -32.512 |                                                                  |  |               |                 |                                                                  |           |     |             |           |     |   |              |                                                                                                                                                                                                                                                                        |  |  |              |       |  |               |     |   |           |         |   |           |         |         |           |                                                                                                                                                                                                                                                                        |         |         |  |       |        |               |   |         |           |         |   |           |     |         |           |         |   |         |  |         |   |         |   |         |         |   |  |         |         |   |  |         |         |   |  |         |         |   |                                                                                                                                                                                                                                                                                                                                                                                                                                                                                                                                                                                                                                                                                                                                                                                                                                                                                                                                                                                                                                                                                                                       |  |  |  |           |  |  |                 |     |   |   |             |  |  |  |              |  |  |  |              |  |  |  |     |   |         |         |  |   |         |         |  |   |         |         |  |   |         |         |   |         |   |         |  |         |   |         |  |         |   |         |  |         |   |         |   |         |         |   |  |         |         |   |  |         |         |   |  |         |         |   |                                                                                                                                                                                                                                                                                                                                                                                                                                                                                                                                                                                                                                                                                                                                                                                                                                                                                                                                                                                                                                                                                                                      |  |  |  |           |  |  |                 |     |   |   |             |  |  |  |              |  |  |  |              |  |  |  |     |   |         |         |  |   |         |         |  |   |        |         |  |   |         |         |   |         |   |         |  |         |   |         |  |         |   |         |  |         |   |         |   |         |         |   |  |         |         |   |  |         |         |   |  |         |         |   |
| 2                                                                                                                                                                                                                                                                                                                                                                                                                                                                                                                                                                                                                                                                                                                                                                                                                                                                                                                                                                                                                                                                                                                  | 119.191 | 94.6513       | 0       |                                                                  |  |               |                 |                                                                  |           |     |             |           |     |   |              |                                                                                                                                                                                                                                                                        |  |  |              |       |  |               |     |   |           |         |   |           |         |         |           |                                                                                                                                                                                                                                                                        |         |         |  |       |        |               |   |         |           |         |   |           |     |         |           |         |   |         |  |         |   |         |   |         |         |   |  |         |         |   |  |         |         |   |  |         |         |   |                                                                                                                                                                                                                                                                                                                                                                                                                                                                                                                                                                                                                                                                                                                                                                                                                                                                                                                                                                                                                                                                                                                       |  |  |  |           |  |  |                 |     |   |   |             |  |  |  |              |  |  |  |              |  |  |  |     |   |         |         |  |   |         |         |  |   |         |         |  |   |         |         |   |         |   |         |  |         |   |         |  |         |   |         |  |         |   |         |   |         |         |   |  |         |         |   |  |         |         |   |  |         |         |   |                                                                                                                                                                                                                                                                                                                                                                                                                                                                                                                                                                                                                                                                                                                                                                                                                                                                                                                                                                                                                                                                                                                      |  |  |  |           |  |  |                 |     |   |   |             |  |  |  |              |  |  |  |              |  |  |  |     |   |         |         |  |   |         |         |  |   |        |         |  |   |         |         |   |         |   |         |  |         |   |         |  |         |   |         |  |         |   |         |   |         |         |   |  |         |         |   |  |         |         |   |  |         |         |   |
|                                                                                                                                                                                                                                                                                                                                                                                                                                                                                                                                                                                                                                                                                                                                                                                                                                                                                                                                                                                                                                                                                                                    | 24.5801 | 23.5337       | 0       |                                                                  |  |               |                 |                                                                  |           |     |             |           |     |   |              |                                                                                                                                                                                                                                                                        |  |  |              |       |  |               |     |   |           |         |   |           |         |         |           |                                                                                                                                                                                                                                                                        |         |         |  |       |        |               |   |         |           |         |   |           |     |         |           |         |   |         |  |         |   |         |   |         |         |   |  |         |         |   |  |         |         |   |  |         |         |   |                                                                                                                                                                                                                                                                                                                                                                                                                                                                                                                                                                                                                                                                                                                                                                                                                                                                                                                                                                                                                                                                                                                       |  |  |  |           |  |  |                 |     |   |   |             |  |  |  |              |  |  |  |              |  |  |  |     |   |         |         |  |   |         |         |  |   |         |         |  |   |         |         |   |         |   |         |  |         |   |         |  |         |   |         |  |         |   |         |   |         |         |   |  |         |         |   |  |         |         |   |  |         |         |   |                                                                                                                                                                                                                                                                                                                                                                                                                                                                                                                                                                                                                                                                                                                                                                                                                                                                                                                                                                                                                                                                                                                      |  |  |  |           |  |  |                 |     |   |   |             |  |  |  |              |  |  |  |              |  |  |  |     |   |         |         |  |   |         |         |  |   |        |         |  |   |         |         |   |         |   |         |  |         |   |         |  |         |   |         |  |         |   |         |   |         |         |   |  |         |         |   |  |         |         |   |  |         |         |   |
|                                                                                                                                                                                                                                                                                                                                                                                                                                                                                                                                                                                                                                                                                                                                                                                                                                                                                                                                                                                                                                                                                                                    | 54.2893 | 32.5122       | 0       |                                                                  |  |               |                 |                                                                  |           |     |             |           |     |   |              |                                                                                                                                                                                                                                                                        |  |  |              |       |  |               |     |   |           |         |   |           |         |         |           |                                                                                                                                                                                                                                                                        |         |         |  |       |        |               |   |         |           |         |   |           |     |         |           |         |   |         |  |         |   |         |   |         |         |   |  |         |         |   |  |         |         |   |  |         |         |   |                                                                                                                                                                                                                                                                                                                                                                                                                                                                                                                                                                                                                                                                                                                                                                                                                                                                                                                                                                                                                                                                                                                       |  |  |  |           |  |  |                 |     |   |   |             |  |  |  |              |  |  |  |              |  |  |  |     |   |         |         |  |   |         |         |  |   |         |         |  |   |         |         |   |         |   |         |  |         |   |         |  |         |   |         |  |         |   |         |   |         |         |   |  |         |         |   |  |         |         |   |  |         |         |   |                                                                                                                                                                                                                                                                                                                                                                                                                                                                                                                                                                                                                                                                                                                                                                                                                                                                                                                                                                                                                                                                                                                      |  |  |  |           |  |  |                 |     |   |   |             |  |  |  |              |  |  |  |              |  |  |  |     |   |         |         |  |   |         |         |  |   |        |         |  |   |         |         |   |         |   |         |  |         |   |         |  |         |   |         |  |         |   |         |   |         |         |   |  |         |         |   |  |         |         |   |  |         |         |   |
|                                                                                                                                                                                                                                                                                                                                                                                                                                                                                                                                                                                                                                                                                                                                                                                                                                                                                                                                                                                                                                                                                                                    | 184.094 | 156.79        | 0       |                                                                  |  |               |                 |                                                                  |           |     |             |           |     |   |              |                                                                                                                                                                                                                                                                        |  |  |              |       |  |               |     |   |           |         |   |           |         |         |           |                                                                                                                                                                                                                                                                        |         |         |  |       |        |               |   |         |           |         |   |           |     |         |           |         |   |         |  |         |   |         |   |         |         |   |  |         |         |   |  |         |         |   |  |         |         |   |                                                                                                                                                                                                                                                                                                                                                                                                                                                                                                                                                                                                                                                                                                                                                                                                                                                                                                                                                                                                                                                                                                                       |  |  |  |           |  |  |                 |     |   |   |             |  |  |  |              |  |  |  |              |  |  |  |     |   |         |         |  |   |         |         |  |   |         |         |  |   |         |         |   |         |   |         |  |         |   |         |  |         |   |         |  |         |   |         |   |         |         |   |  |         |         |   |  |         |         |   |  |         |         |   |                                                                                                                                                                                                                                                                                                                                                                                                                                                                                                                                                                                                                                                                                                                                                                                                                                                                                                                                                                                                                                                                                                                      |  |  |  |           |  |  |                 |     |   |   |             |  |  |  |              |  |  |  |              |  |  |  |     |   |         |         |  |   |         |         |  |   |        |         |  |   |         |         |   |         |   |         |  |         |   |         |  |         |   |         |  |         |   |         |   |         |         |   |  |         |         |   |  |         |         |   |  |         |         |   |
| LSMean[j]                                                                                                                                                                                                                                                                                                                                                                                                                                                                                                                                                                                                                                                                                                                                                                                                                                                                                                                                                                                                                                                                                                          |         |               |         |                                                                  |  |               |                 |                                                                  |           |     |             |           |     |   |              |                                                                                                                                                                                                                                                                        |  |  |              |       |  |               |     |   |           |         |   |           |         |         |           |                                                                                                                                                                                                                                                                        |         |         |  |       |        |               |   |         |           |         |   |           |     |         |           |         |   |         |  |         |   |         |   |         |         |   |  |         |         |   |  |         |         |   |  |         |         |   |                                                                                                                                                                                                                                                                                                                                                                                                                                                                                                                                                                                                                                                                                                                                                                                                                                                                                                                                                                                                                                                                                                                       |  |  |  |           |  |  |                 |     |   |   |             |  |  |  |              |  |  |  |              |  |  |  |     |   |         |         |  |   |         |         |  |   |         |         |  |   |         |         |   |         |   |         |  |         |   |         |  |         |   |         |  |         |   |         |   |         |         |   |  |         |         |   |  |         |         |   |  |         |         |   |                                                                                                                                                                                                                                                                                                                                                                                                                                                                                                                                                                                                                                                                                                                                                                                                                                                                                                                                                                                                                                                                                                                      |  |  |  |           |  |  |                 |     |   |   |             |  |  |  |              |  |  |  |              |  |  |  |     |   |         |         |  |   |         |         |  |   |        |         |  |   |         |         |   |         |   |         |  |         |   |         |  |         |   |         |  |         |   |         |   |         |         |   |  |         |         |   |  |         |         |   |  |         |         |   |
| Mean[j]-Mean[j]                                                                                                                                                                                                                                                                                                                                                                                                                                                                                                                                                                                                                                                                                                                                                                                                                                                                                                                                                                                                                                                                                                    | 0.5     | 1             | 2       |                                                                  |  |               |                 |                                                                  |           |     |             |           |     |   |              |                                                                                                                                                                                                                                                                        |  |  |              |       |  |               |     |   |           |         |   |           |         |         |           |                                                                                                                                                                                                                                                                        |         |         |  |       |        |               |   |         |           |         |   |           |     |         |           |         |   |         |  |         |   |         |   |         |         |   |  |         |         |   |  |         |         |   |  |         |         |   |                                                                                                                                                                                                                                                                                                                                                                                                                                                                                                                                                                                                                                                                                                                                                                                                                                                                                                                                                                                                                                                                                                                       |  |  |  |           |  |  |                 |     |   |   |             |  |  |  |              |  |  |  |              |  |  |  |     |   |         |         |  |   |         |         |  |   |         |         |  |   |         |         |   |         |   |         |  |         |   |         |  |         |   |         |  |         |   |         |   |         |         |   |  |         |         |   |  |         |         |   |  |         |         |   |                                                                                                                                                                                                                                                                                                                                                                                                                                                                                                                                                                                                                                                                                                                                                                                                                                                                                                                                                                                                                                                                                                                      |  |  |  |           |  |  |                 |     |   |   |             |  |  |  |              |  |  |  |              |  |  |  |     |   |         |         |  |   |         |         |  |   |        |         |  |   |         |         |   |         |   |         |  |         |   |         |  |         |   |         |  |         |   |         |   |         |         |   |  |         |         |   |  |         |         |   |  |         |         |   |
| Std Err Dif                                                                                                                                                                                                                                                                                                                                                                                                                                                                                                                                                                                                                                                                                                                                                                                                                                                                                                                                                                                                                                                                                                        |         |               |         |                                                                  |  |               |                 |                                                                  |           |     |             |           |     |   |              |                                                                                                                                                                                                                                                                        |  |  |              |       |  |               |     |   |           |         |   |           |         |         |           |                                                                                                                                                                                                                                                                        |         |         |  |       |        |               |   |         |           |         |   |           |     |         |           |         |   |         |  |         |   |         |   |         |         |   |  |         |         |   |  |         |         |   |  |         |         |   |                                                                                                                                                                                                                                                                                                                                                                                                                                                                                                                                                                                                                                                                                                                                                                                                                                                                                                                                                                                                                                                                                                                       |  |  |  |           |  |  |                 |     |   |   |             |  |  |  |              |  |  |  |              |  |  |  |     |   |         |         |  |   |         |         |  |   |         |         |  |   |         |         |   |         |   |         |  |         |   |         |  |         |   |         |  |         |   |         |   |         |         |   |  |         |         |   |  |         |         |   |  |         |         |   |                                                                                                                                                                                                                                                                                                                                                                                                                                                                                                                                                                                                                                                                                                                                                                                                                                                                                                                                                                                                                                                                                                                      |  |  |  |           |  |  |                 |     |   |   |             |  |  |  |              |  |  |  |              |  |  |  |     |   |         |         |  |   |         |         |  |   |        |         |  |   |         |         |   |         |   |         |  |         |   |         |  |         |   |         |  |         |   |         |   |         |         |   |  |         |         |   |  |         |         |   |  |         |         |   |
| Lower CL Dif                                                                                                                                                                                                                                                                                                                                                                                                                                                                                                                                                                                                                                                                                                                                                                                                                                                                                                                                                                                                                                                                                                       |         |               |         |                                                                  |  |               |                 |                                                                  |           |     |             |           |     |   |              |                                                                                                                                                                                                                                                                        |  |  |              |       |  |               |     |   |           |         |   |           |         |         |           |                                                                                                                                                                                                                                                                        |         |         |  |       |        |               |   |         |           |         |   |           |     |         |           |         |   |         |  |         |   |         |   |         |         |   |  |         |         |   |  |         |         |   |  |         |         |   |                                                                                                                                                                                                                                                                                                                                                                                                                                                                                                                                                                                                                                                                                                                                                                                                                                                                                                                                                                                                                                                                                                                       |  |  |  |           |  |  |                 |     |   |   |             |  |  |  |              |  |  |  |              |  |  |  |     |   |         |         |  |   |         |         |  |   |         |         |  |   |         |         |   |         |   |         |  |         |   |         |  |         |   |         |  |         |   |         |   |         |         |   |  |         |         |   |  |         |         |   |  |         |         |   |                                                                                                                                                                                                                                                                                                                                                                                                                                                                                                                                                                                                                                                                                                                                                                                                                                                                                                                                                                                                                                                                                                                      |  |  |  |           |  |  |                 |     |   |   |             |  |  |  |              |  |  |  |              |  |  |  |     |   |         |         |  |   |         |         |  |   |        |         |  |   |         |         |   |         |   |         |  |         |   |         |  |         |   |         |  |         |   |         |   |         |         |   |  |         |         |   |  |         |         |   |  |         |         |   |
| Upper CL Dif                                                                                                                                                                                                                                                                                                                                                                                                                                                                                                                                                                                                                                                                                                                                                                                                                                                                                                                                                                                                                                                                                                       |         |               |         |                                                                  |  |               |                 |                                                                  |           |     |             |           |     |   |              |                                                                                                                                                                                                                                                                        |  |  |              |       |  |               |     |   |           |         |   |           |         |         |           |                                                                                                                                                                                                                                                                        |         |         |  |       |        |               |   |         |           |         |   |           |     |         |           |         |   |         |  |         |   |         |   |         |         |   |  |         |         |   |  |         |         |   |  |         |         |   |                                                                                                                                                                                                                                                                                                                                                                                                                                                                                                                                                                                                                                                                                                                                                                                                                                                                                                                                                                                                                                                                                                                       |  |  |  |           |  |  |                 |     |   |   |             |  |  |  |              |  |  |  |              |  |  |  |     |   |         |         |  |   |         |         |  |   |         |         |  |   |         |         |   |         |   |         |  |         |   |         |  |         |   |         |  |         |   |         |   |         |         |   |  |         |         |   |  |         |         |   |  |         |         |   |                                                                                                                                                                                                                                                                                                                                                                                                                                                                                                                                                                                                                                                                                                                                                                                                                                                                                                                                                                                                                                                                                                                      |  |  |  |           |  |  |                 |     |   |   |             |  |  |  |              |  |  |  |              |  |  |  |     |   |         |         |  |   |         |         |  |   |        |         |  |   |         |         |   |         |   |         |  |         |   |         |  |         |   |         |  |         |   |         |   |         |         |   |  |         |         |   |  |         |         |   |  |         |         |   |
| 0.5                                                                                                                                                                                                                                                                                                                                                                                                                                                                                                                                                                                                                                                                                                                                                                                                                                                                                                                                                                                                                                                                                                                | 0       | -33.695       | -99.458 |                                                                  |  |               |                 |                                                                  |           |     |             |           |     |   |              |                                                                                                                                                                                                                                                                        |  |  |              |       |  |               |     |   |           |         |   |           |         |         |           |                                                                                                                                                                                                                                                                        |         |         |  |       |        |               |   |         |           |         |   |           |     |         |           |         |   |         |  |         |   |         |   |         |         |   |  |         |         |   |  |         |         |   |  |         |         |   |                                                                                                                                                                                                                                                                                                                                                                                                                                                                                                                                                                                                                                                                                                                                                                                                                                                                                                                                                                                                                                                                                                                       |  |  |  |           |  |  |                 |     |   |   |             |  |  |  |              |  |  |  |              |  |  |  |     |   |         |         |  |   |         |         |  |   |         |         |  |   |         |         |   |         |   |         |  |         |   |         |  |         |   |         |  |         |   |         |   |         |         |   |  |         |         |   |  |         |         |   |  |         |         |   |                                                                                                                                                                                                                                                                                                                                                                                                                                                                                                                                                                                                                                                                                                                                                                                                                                                                                                                                                                                                                                                                                                                      |  |  |  |           |  |  |                 |     |   |   |             |  |  |  |              |  |  |  |              |  |  |  |     |   |         |         |  |   |         |         |  |   |        |         |  |   |         |         |   |         |   |         |  |         |   |         |  |         |   |         |  |         |   |         |   |         |         |   |  |         |         |   |  |         |         |   |  |         |         |   |
|                                                                                                                                                                                                                                                                                                                                                                                                                                                                                                                                                                                                                                                                                                                                                                                                                                                                                                                                                                                                                                                                                                                    | 0       | 41.6158       | 41.6158 |                                                                  |  |               |                 |                                                                  |           |     |             |           |     |   |              |                                                                                                                                                                                                                                                                        |  |  |              |       |  |               |     |   |           |         |   |           |         |         |           |                                                                                                                                                                                                                                                                        |         |         |  |       |        |               |   |         |           |         |   |           |     |         |           |         |   |         |  |         |   |         |   |         |         |   |  |         |         |   |  |         |         |   |  |         |         |   |                                                                                                                                                                                                                                                                                                                                                                                                                                                                                                                                                                                                                                                                                                                                                                                                                                                                                                                                                                                                                                                                                                                       |  |  |  |           |  |  |                 |     |   |   |             |  |  |  |              |  |  |  |              |  |  |  |     |   |         |         |  |   |         |         |  |   |         |         |  |   |         |         |   |         |   |         |  |         |   |         |  |         |   |         |  |         |   |         |   |         |         |   |  |         |         |   |  |         |         |   |  |         |         |   |                                                                                                                                                                                                                                                                                                                                                                                                                                                                                                                                                                                                                                                                                                                                                                                                                                                                                                                                                                                                                                                                                                                      |  |  |  |           |  |  |                 |     |   |   |             |  |  |  |              |  |  |  |              |  |  |  |     |   |         |         |  |   |         |         |  |   |        |         |  |   |         |         |   |         |   |         |  |         |   |         |  |         |   |         |  |         |   |         |   |         |         |   |  |         |         |   |  |         |         |   |  |         |         |   |
|                                                                                                                                                                                                                                                                                                                                                                                                                                                                                                                                                                                                                                                                                                                                                                                                                                                                                                                                                                                                                                                                                                                    | 0       | -143.58       | -209.34 |                                                                  |  |               |                 |                                                                  |           |     |             |           |     |   |              |                                                                                                                                                                                                                                                                        |  |  |              |       |  |               |     |   |           |         |   |           |         |         |           |                                                                                                                                                                                                                                                                        |         |         |  |       |        |               |   |         |           |         |   |           |     |         |           |         |   |         |  |         |   |         |   |         |         |   |  |         |         |   |  |         |         |   |  |         |         |   |                                                                                                                                                                                                                                                                                                                                                                                                                                                                                                                                                                                                                                                                                                                                                                                                                                                                                                                                                                                                                                                                                                                       |  |  |  |           |  |  |                 |     |   |   |             |  |  |  |              |  |  |  |              |  |  |  |     |   |         |         |  |   |         |         |  |   |         |         |  |   |         |         |   |         |   |         |  |         |   |         |  |         |   |         |  |         |   |         |   |         |         |   |  |         |         |   |  |         |         |   |  |         |         |   |                                                                                                                                                                                                                                                                                                                                                                                                                                                                                                                                                                                                                                                                                                                                                                                                                                                                                                                                                                                                                                                                                                                      |  |  |  |           |  |  |                 |     |   |   |             |  |  |  |              |  |  |  |              |  |  |  |     |   |         |         |  |   |         |         |  |   |        |         |  |   |         |         |   |         |   |         |  |         |   |         |  |         |   |         |  |         |   |         |   |         |         |   |  |         |         |   |  |         |         |   |  |         |         |   |
|                                                                                                                                                                                                                                                                                                                                                                                                                                                                                                                                                                                                                                                                                                                                                                                                                                                                                                                                                                                                                                                                                                                    | 0       | 76.1892       | 10.4257 |                                                                  |  |               |                 |                                                                  |           |     |             |           |     |   |              |                                                                                                                                                                                                                                                                        |  |  |              |       |  |               |     |   |           |         |   |           |         |         |           |                                                                                                                                                                                                                                                                        |         |         |  |       |        |               |   |         |           |         |   |           |     |         |           |         |   |         |  |         |   |         |   |         |         |   |  |         |         |   |  |         |         |   |  |         |         |   |                                                                                                                                                                                                                                                                                                                                                                                                                                                                                                                                                                                                                                                                                                                                                                                                                                                                                                                                                                                                                                                                                                                       |  |  |  |           |  |  |                 |     |   |   |             |  |  |  |              |  |  |  |              |  |  |  |     |   |         |         |  |   |         |         |  |   |         |         |  |   |         |         |   |         |   |         |  |         |   |         |  |         |   |         |  |         |   |         |   |         |         |   |  |         |         |   |  |         |         |   |  |         |         |   |                                                                                                                                                                                                                                                                                                                                                                                                                                                                                                                                                                                                                                                                                                                                                                                                                                                                                                                                                                                                                                                                                                                      |  |  |  |           |  |  |                 |     |   |   |             |  |  |  |              |  |  |  |              |  |  |  |     |   |         |         |  |   |         |         |  |   |        |         |  |   |         |         |   |         |   |         |  |         |   |         |  |         |   |         |  |         |   |         |   |         |         |   |  |         |         |   |  |         |         |   |  |         |         |   |
| 1                                                                                                                                                                                                                                                                                                                                                                                                                                                                                                                                                                                                                                                                                                                                                                                                                                                                                                                                                                                                                                                                                                                  | 33.6949 | 0             | -65.764 |                                                                  |  |               |                 |                                                                  |           |     |             |           |     |   |              |                                                                                                                                                                                                                                                                        |  |  |              |       |  |               |     |   |           |         |   |           |         |         |           |                                                                                                                                                                                                                                                                        |         |         |  |       |        |               |   |         |           |         |   |           |     |         |           |         |   |         |  |         |   |         |   |         |         |   |  |         |         |   |  |         |         |   |  |         |         |   |                                                                                                                                                                                                                                                                                                                                                                                                                                                                                                                                                                                                                                                                                                                                                                                                                                                                                                                                                                                                                                                                                                                       |  |  |  |           |  |  |                 |     |   |   |             |  |  |  |              |  |  |  |              |  |  |  |     |   |         |         |  |   |         |         |  |   |         |         |  |   |         |         |   |         |   |         |  |         |   |         |  |         |   |         |  |         |   |         |   |         |         |   |  |         |         |   |  |         |         |   |  |         |         |   |                                                                                                                                                                                                                                                                                                                                                                                                                                                                                                                                                                                                                                                                                                                                                                                                                                                                                                                                                                                                                                                                                                                      |  |  |  |           |  |  |                 |     |   |   |             |  |  |  |              |  |  |  |              |  |  |  |     |   |         |         |  |   |         |         |  |   |        |         |  |   |         |         |   |         |   |         |  |         |   |         |  |         |   |         |  |         |   |         |   |         |         |   |  |         |         |   |  |         |         |   |  |         |         |   |
|                                                                                                                                                                                                                                                                                                                                                                                                                                                                                                                                                                                                                                                                                                                                                                                                                                                                                                                                                                                                                                                                                                                    | 41.6158 | 0             | 43.4663 |                                                                  |  |               |                 |                                                                  |           |     |             |           |     |   |              |                                                                                                                                                                                                                                                                        |  |  |              |       |  |               |     |   |           |         |   |           |         |         |           |                                                                                                                                                                                                                                                                        |         |         |  |       |        |               |   |         |           |         |   |           |     |         |           |         |   |         |  |         |   |         |   |         |         |   |  |         |         |   |  |         |         |   |  |         |         |   |                                                                                                                                                                                                                                                                                                                                                                                                                                                                                                                                                                                                                                                                                                                                                                                                                                                                                                                                                                                                                                                                                                                       |  |  |  |           |  |  |                 |     |   |   |             |  |  |  |              |  |  |  |              |  |  |  |     |   |         |         |  |   |         |         |  |   |         |         |  |   |         |         |   |         |   |         |  |         |   |         |  |         |   |         |  |         |   |         |   |         |         |   |  |         |         |   |  |         |         |   |  |         |         |   |                                                                                                                                                                                                                                                                                                                                                                                                                                                                                                                                                                                                                                                                                                                                                                                                                                                                                                                                                                                                                                                                                                                      |  |  |  |           |  |  |                 |     |   |   |             |  |  |  |              |  |  |  |              |  |  |  |     |   |         |         |  |   |         |         |  |   |        |         |  |   |         |         |   |         |   |         |  |         |   |         |  |         |   |         |  |         |   |         |   |         |         |   |  |         |         |   |  |         |         |   |  |         |         |   |
|                                                                                                                                                                                                                                                                                                                                                                                                                                                                                                                                                                                                                                                                                                                                                                                                                                                                                                                                                                                                                                                                                                                    | -76.189 | 0             | -180.53 |                                                                  |  |               |                 |                                                                  |           |     |             |           |     |   |              |                                                                                                                                                                                                                                                                        |  |  |              |       |  |               |     |   |           |         |   |           |         |         |           |                                                                                                                                                                                                                                                                        |         |         |  |       |        |               |   |         |           |         |   |           |     |         |           |         |   |         |  |         |   |         |   |         |         |   |  |         |         |   |  |         |         |   |  |         |         |   |                                                                                                                                                                                                                                                                                                                                                                                                                                                                                                                                                                                                                                                                                                                                                                                                                                                                                                                                                                                                                                                                                                                       |  |  |  |           |  |  |                 |     |   |   |             |  |  |  |              |  |  |  |              |  |  |  |     |   |         |         |  |   |         |         |  |   |         |         |  |   |         |         |   |         |   |         |  |         |   |         |  |         |   |         |  |         |   |         |   |         |         |   |  |         |         |   |  |         |         |   |  |         |         |   |                                                                                                                                                                                                                                                                                                                                                                                                                                                                                                                                                                                                                                                                                                                                                                                                                                                                                                                                                                                                                                                                                                                      |  |  |  |           |  |  |                 |     |   |   |             |  |  |  |              |  |  |  |              |  |  |  |     |   |         |         |  |   |         |         |  |   |        |         |  |   |         |         |   |         |   |         |  |         |   |         |  |         |   |         |  |         |   |         |   |         |         |   |  |         |         |   |  |         |         |   |  |         |         |   |
|                                                                                                                                                                                                                                                                                                                                                                                                                                                                                                                                                                                                                                                                                                                                                                                                                                                                                                                                                                                                                                                                                                                    | 143.579 | 0             | 49.0066 |                                                                  |  |               |                 |                                                                  |           |     |             |           |     |   |              |                                                                                                                                                                                                                                                                        |  |  |              |       |  |               |     |   |           |         |   |           |         |         |           |                                                                                                                                                                                                                                                                        |         |         |  |       |        |               |   |         |           |         |   |           |     |         |           |         |   |         |  |         |   |         |   |         |         |   |  |         |         |   |  |         |         |   |  |         |         |   |                                                                                                                                                                                                                                                                                                                                                                                                                                                                                                                                                                                                                                                                                                                                                                                                                                                                                                                                                                                                                                                                                                                       |  |  |  |           |  |  |                 |     |   |   |             |  |  |  |              |  |  |  |              |  |  |  |     |   |         |         |  |   |         |         |  |   |         |         |  |   |         |         |   |         |   |         |  |         |   |         |  |         |   |         |  |         |   |         |   |         |         |   |  |         |         |   |  |         |         |   |  |         |         |   |                                                                                                                                                                                                                                                                                                                                                                                                                                                                                                                                                                                                                                                                                                                                                                                                                                                                                                                                                                                                                                                                                                                      |  |  |  |           |  |  |                 |     |   |   |             |  |  |  |              |  |  |  |              |  |  |  |     |   |         |         |  |   |         |         |  |   |        |         |  |   |         |         |   |         |   |         |  |         |   |         |  |         |   |         |  |         |   |         |   |         |         |   |  |         |         |   |  |         |         |   |  |         |         |   |
| 2                                                                                                                                                                                                                                                                                                                                                                                                                                                                                                                                                                                                                                                                                                                                                                                                                                                                                                                                                                                                                                                                                                                  | 99.4584 | 65.7635       | 0       |                                                                  |  |               |                 |                                                                  |           |     |             |           |     |   |              |                                                                                                                                                                                                                                                                        |  |  |              |       |  |               |     |   |           |         |   |           |         |         |           |                                                                                                                                                                                                                                                                        |         |         |  |       |        |               |   |         |           |         |   |           |     |         |           |         |   |         |  |         |   |         |   |         |         |   |  |         |         |   |  |         |         |   |  |         |         |   |                                                                                                                                                                                                                                                                                                                                                                                                                                                                                                                                                                                                                                                                                                                                                                                                                                                                                                                                                                                                                                                                                                                       |  |  |  |           |  |  |                 |     |   |   |             |  |  |  |              |  |  |  |              |  |  |  |     |   |         |         |  |   |         |         |  |   |         |         |  |   |         |         |   |         |   |         |  |         |   |         |  |         |   |         |  |         |   |         |   |         |         |   |  |         |         |   |  |         |         |   |  |         |         |   |                                                                                                                                                                                                                                                                                                                                                                                                                                                                                                                                                                                                                                                                                                                                                                                                                                                                                                                                                                                                                                                                                                                      |  |  |  |           |  |  |                 |     |   |   |             |  |  |  |              |  |  |  |              |  |  |  |     |   |         |         |  |   |         |         |  |   |        |         |  |   |         |         |   |         |   |         |  |         |   |         |  |         |   |         |  |         |   |         |   |         |         |   |  |         |         |   |  |         |         |   |  |         |         |   |
|                                                                                                                                                                                                                                                                                                                                                                                                                                                                                                                                                                                                                                                                                                                                                                                                                                                                                                                                                                                                                                                                                                                    | 41.6158 | 43.4663       | 0       |                                                                  |  |               |                 |                                                                  |           |     |             |           |     |   |              |                                                                                                                                                                                                                                                                        |  |  |              |       |  |               |     |   |           |         |   |           |         |         |           |                                                                                                                                                                                                                                                                        |         |         |  |       |        |               |   |         |           |         |   |           |     |         |           |         |   |         |  |         |   |         |   |         |         |   |  |         |         |   |  |         |         |   |  |         |         |   |                                                                                                                                                                                                                                                                                                                                                                                                                                                                                                                                                                                                                                                                                                                                                                                                                                                                                                                                                                                                                                                                                                                       |  |  |  |           |  |  |                 |     |   |   |             |  |  |  |              |  |  |  |              |  |  |  |     |   |         |         |  |   |         |         |  |   |         |         |  |   |         |         |   |         |   |         |  |         |   |         |  |         |   |         |  |         |   |         |   |         |         |   |  |         |         |   |  |         |         |   |  |         |         |   |                                                                                                                                                                                                                                                                                                                                                                                                                                                                                                                                                                                                                                                                                                                                                                                                                                                                                                                                                                                                                                                                                                                      |  |  |  |           |  |  |                 |     |   |   |             |  |  |  |              |  |  |  |              |  |  |  |     |   |         |         |  |   |         |         |  |   |        |         |  |   |         |         |   |         |   |         |  |         |   |         |  |         |   |         |  |         |   |         |   |         |         |   |  |         |         |   |  |         |         |   |  |         |         |   |
|                                                                                                                                                                                                                                                                                                                                                                                                                                                                                                                                                                                                                                                                                                                                                                                                                                                                                                                                                                                                                                                                                                                    | -10.426 | -49.007       | 0       |                                                                  |  |               |                 |                                                                  |           |     |             |           |     |   |              |                                                                                                                                                                                                                                                                        |  |  |              |       |  |               |     |   |           |         |   |           |         |         |           |                                                                                                                                                                                                                                                                        |         |         |  |       |        |               |   |         |           |         |   |           |     |         |           |         |   |         |  |         |   |         |   |         |         |   |  |         |         |   |  |         |         |   |  |         |         |   |                                                                                                                                                                                                                                                                                                                                                                                                                                                                                                                                                                                                                                                                                                                                                                                                                                                                                                                                                                                                                                                                                                                       |  |  |  |           |  |  |                 |     |   |   |             |  |  |  |              |  |  |  |              |  |  |  |     |   |         |         |  |   |         |         |  |   |         |         |  |   |         |         |   |         |   |         |  |         |   |         |  |         |   |         |  |         |   |         |   |         |         |   |  |         |         |   |  |         |         |   |  |         |         |   |                                                                                                                                                                                                                                                                                                                                                                                                                                                                                                                                                                                                                                                                                                                                                                                                                                                                                                                                                                                                                                                                                                                      |  |  |  |           |  |  |                 |     |   |   |             |  |  |  |              |  |  |  |              |  |  |  |     |   |         |         |  |   |         |         |  |   |        |         |  |   |         |         |   |         |   |         |  |         |   |         |  |         |   |         |  |         |   |         |   |         |         |   |  |         |         |   |  |         |         |   |  |         |         |   |
|                                                                                                                                                                                                                                                                                                                                                                                                                                                                                                                                                                                                                                                                                                                                                                                                                                                                                                                                                                                                                                                                                                                    | 209.342 | 180.534       | 0       |                                                                  |  |               |                 |                                                                  |           |     |             |           |     |   |              |                                                                                                                                                                                                                                                                        |  |  |              |       |  |               |     |   |           |         |   |           |         |         |           |                                                                                                                                                                                                                                                                        |         |         |  |       |        |               |   |         |           |         |   |           |     |         |           |         |   |         |  |         |   |         |   |         |         |   |  |         |         |   |  |         |         |   |  |         |         |   |                                                                                                                                                                                                                                                                                                                                                                                                                                                                                                                                                                                                                                                                                                                                                                                                                                                                                                                                                                                                                                                                                                                       |  |  |  |           |  |  |                 |     |   |   |             |  |  |  |              |  |  |  |              |  |  |  |     |   |         |         |  |   |         |         |  |   |         |         |  |   |         |         |   |         |   |         |  |         |   |         |  |         |   |         |  |         |   |         |   |         |         |   |  |         |         |   |  |         |         |   |  |         |         |   |                                                                                                                                                                                                                                                                                                                                                                                                                                                                                                                                                                                                                                                                                                                                                                                                                                                                                                                                                                                                                                                                                                                      |  |  |  |           |  |  |                 |     |   |   |             |  |  |  |              |  |  |  |              |  |  |  |     |   |         |         |  |   |         |         |  |   |        |         |  |   |         |         |   |         |   |         |  |         |   |         |  |         |   |         |  |         |   |         |   |         |         |   |  |         |         |   |  |         |         |   |  |         |         |   |
| <table border="1"> <thead> <tr><th>Level</th><th></th><th>Least Sq Mean</th></tr> </thead> <tbody> <tr><td>2</td><td>A</td><td>553.64547</td></tr> <tr><td>1</td><td>B</td><td>458.99416</td></tr> <tr><td>0.5</td><td>B</td><td>434.45397</td></tr> </tbody> </table>                                                                                                                                                                                                                                                                                                                                                                                                                                                                                                                                                                                                                                                                                                                                                                                                                                             |         |               |         | Level                                                            |  | Least Sq Mean | 2               | A                                                                | 553.64547 | 1   | B           | 458.99416 | 0.5 | B | 434.45397    | <table border="1"> <thead> <tr><th>Level</th><th></th><th>Least Sq Mean</th></tr> </thead> <tbody> <tr><td>2</td><td>A</td><td>675.10689</td></tr> <tr><td>1</td><td>A</td><td>609.34338</td></tr> <tr><td>0.5</td><td>A</td><td>575.64851</td></tr> </tbody> </table> |  |  |              | Level |  | Least Sq Mean | 2   | A | 675.10689 | 1       | A | 609.34338 | 0.5     | A       | 575.64851 |                                                                                                                                                                                                                                                                        |         |         |  |       |        |               |   |         |           |         |   |           |     |         |           |         |   |         |  |         |   |         |   |         |         |   |  |         |         |   |  |         |         |   |  |         |         |   |                                                                                                                                                                                                                                                                                                                                                                                                                                                                                                                                                                                                                                                                                                                                                                                                                                                                                                                                                                                                                                                                                                                       |  |  |  |           |  |  |                 |     |   |   |             |  |  |  |              |  |  |  |              |  |  |  |     |   |         |         |  |   |         |         |  |   |         |         |  |   |         |         |   |         |   |         |  |         |   |         |  |         |   |         |  |         |   |         |   |         |         |   |  |         |         |   |  |         |         |   |  |         |         |   |                                                                                                                                                                                                                                                                                                                                                                                                                                                                                                                                                                                                                                                                                                                                                                                                                                                                                                                                                                                                                                                                                                                      |  |  |  |           |  |  |                 |     |   |   |             |  |  |  |              |  |  |  |              |  |  |  |     |   |         |         |  |   |         |         |  |   |        |         |  |   |         |         |   |         |   |         |  |         |   |         |  |         |   |         |  |         |   |         |   |         |         |   |  |         |         |   |  |         |         |   |  |         |         |   |
| Level                                                                                                                                                                                                                                                                                                                                                                                                                                                                                                                                                                                                                                                                                                                                                                                                                                                                                                                                                                                                                                                                                                              |         | Least Sq Mean |         |                                                                  |  |               |                 |                                                                  |           |     |             |           |     |   |              |                                                                                                                                                                                                                                                                        |  |  |              |       |  |               |     |   |           |         |   |           |         |         |           |                                                                                                                                                                                                                                                                        |         |         |  |       |        |               |   |         |           |         |   |           |     |         |           |         |   |         |  |         |   |         |   |         |         |   |  |         |         |   |  |         |         |   |  |         |         |   |                                                                                                                                                                                                                                                                                                                                                                                                                                                                                                                                                                                                                                                                                                                                                                                                                                                                                                                                                                                                                                                                                                                       |  |  |  |           |  |  |                 |     |   |   |             |  |  |  |              |  |  |  |              |  |  |  |     |   |         |         |  |   |         |         |  |   |         |         |  |   |         |         |   |         |   |         |  |         |   |         |  |         |   |         |  |         |   |         |   |         |         |   |  |         |         |   |  |         |         |   |  |         |         |   |                                                                                                                                                                                                                                                                                                                                                                                                                                                                                                                                                                                                                                                                                                                                                                                                                                                                                                                                                                                                                                                                                                                      |  |  |  |           |  |  |                 |     |   |   |             |  |  |  |              |  |  |  |              |  |  |  |     |   |         |         |  |   |         |         |  |   |        |         |  |   |         |         |   |         |   |         |  |         |   |         |  |         |   |         |  |         |   |         |   |         |         |   |  |         |         |   |  |         |         |   |  |         |         |   |
| 2                                                                                                                                                                                                                                                                                                                                                                                                                                                                                                                                                                                                                                                                                                                                                                                                                                                                                                                                                                                                                                                                                                                  | A       | 553.64547     |         |                                                                  |  |               |                 |                                                                  |           |     |             |           |     |   |              |                                                                                                                                                                                                                                                                        |  |  |              |       |  |               |     |   |           |         |   |           |         |         |           |                                                                                                                                                                                                                                                                        |         |         |  |       |        |               |   |         |           |         |   |           |     |         |           |         |   |         |  |         |   |         |   |         |         |   |  |         |         |   |  |         |         |   |  |         |         |   |                                                                                                                                                                                                                                                                                                                                                                                                                                                                                                                                                                                                                                                                                                                                                                                                                                                                                                                                                                                                                                                                                                                       |  |  |  |           |  |  |                 |     |   |   |             |  |  |  |              |  |  |  |              |  |  |  |     |   |         |         |  |   |         |         |  |   |         |         |  |   |         |         |   |         |   |         |  |         |   |         |  |         |   |         |  |         |   |         |   |         |         |   |  |         |         |   |  |         |         |   |  |         |         |   |                                                                                                                                                                                                                                                                                                                                                                                                                                                                                                                                                                                                                                                                                                                                                                                                                                                                                                                                                                                                                                                                                                                      |  |  |  |           |  |  |                 |     |   |   |             |  |  |  |              |  |  |  |              |  |  |  |     |   |         |         |  |   |         |         |  |   |        |         |  |   |         |         |   |         |   |         |  |         |   |         |  |         |   |         |  |         |   |         |   |         |         |   |  |         |         |   |  |         |         |   |  |         |         |   |
| 1                                                                                                                                                                                                                                                                                                                                                                                                                                                                                                                                                                                                                                                                                                                                                                                                                                                                                                                                                                                                                                                                                                                  | B       | 458.99416     |         |                                                                  |  |               |                 |                                                                  |           |     |             |           |     |   |              |                                                                                                                                                                                                                                                                        |  |  |              |       |  |               |     |   |           |         |   |           |         |         |           |                                                                                                                                                                                                                                                                        |         |         |  |       |        |               |   |         |           |         |   |           |     |         |           |         |   |         |  |         |   |         |   |         |         |   |  |         |         |   |  |         |         |   |  |         |         |   |                                                                                                                                                                                                                                                                                                                                                                                                                                                                                                                                                                                                                                                                                                                                                                                                                                                                                                                                                                                                                                                                                                                       |  |  |  |           |  |  |                 |     |   |   |             |  |  |  |              |  |  |  |              |  |  |  |     |   |         |         |  |   |         |         |  |   |         |         |  |   |         |         |   |         |   |         |  |         |   |         |  |         |   |         |  |         |   |         |   |         |         |   |  |         |         |   |  |         |         |   |  |         |         |   |                                                                                                                                                                                                                                                                                                                                                                                                                                                                                                                                                                                                                                                                                                                                                                                                                                                                                                                                                                                                                                                                                                                      |  |  |  |           |  |  |                 |     |   |   |             |  |  |  |              |  |  |  |              |  |  |  |     |   |         |         |  |   |         |         |  |   |        |         |  |   |         |         |   |         |   |         |  |         |   |         |  |         |   |         |  |         |   |         |   |         |         |   |  |         |         |   |  |         |         |   |  |         |         |   |
| 0.5                                                                                                                                                                                                                                                                                                                                                                                                                                                                                                                                                                                                                                                                                                                                                                                                                                                                                                                                                                                                                                                                                                                | B       | 434.45397     |         |                                                                  |  |               |                 |                                                                  |           |     |             |           |     |   |              |                                                                                                                                                                                                                                                                        |  |  |              |       |  |               |     |   |           |         |   |           |         |         |           |                                                                                                                                                                                                                                                                        |         |         |  |       |        |               |   |         |           |         |   |           |     |         |           |         |   |         |  |         |   |         |   |         |         |   |  |         |         |   |  |         |         |   |  |         |         |   |                                                                                                                                                                                                                                                                                                                                                                                                                                                                                                                                                                                                                                                                                                                                                                                                                                                                                                                                                                                                                                                                                                                       |  |  |  |           |  |  |                 |     |   |   |             |  |  |  |              |  |  |  |              |  |  |  |     |   |         |         |  |   |         |         |  |   |         |         |  |   |         |         |   |         |   |         |  |         |   |         |  |         |   |         |  |         |   |         |   |         |         |   |  |         |         |   |  |         |         |   |  |         |         |   |                                                                                                                                                                                                                                                                                                                                                                                                                                                                                                                                                                                                                                                                                                                                                                                                                                                                                                                                                                                                                                                                                                                      |  |  |  |           |  |  |                 |     |   |   |             |  |  |  |              |  |  |  |              |  |  |  |     |   |         |         |  |   |         |         |  |   |        |         |  |   |         |         |   |         |   |         |  |         |   |         |  |         |   |         |  |         |   |         |   |         |         |   |  |         |         |   |  |         |         |   |  |         |         |   |
| Level                                                                                                                                                                                                                                                                                                                                                                                                                                                                                                                                                                                                                                                                                                                                                                                                                                                                                                                                                                                                                                                                                                              |         | Least Sq Mean |         |                                                                  |  |               |                 |                                                                  |           |     |             |           |     |   |              |                                                                                                                                                                                                                                                                        |  |  |              |       |  |               |     |   |           |         |   |           |         |         |           |                                                                                                                                                                                                                                                                        |         |         |  |       |        |               |   |         |           |         |   |           |     |         |           |         |   |         |  |         |   |         |   |         |         |   |  |         |         |   |  |         |         |   |  |         |         |   |                                                                                                                                                                                                                                                                                                                                                                                                                                                                                                                                                                                                                                                                                                                                                                                                                                                                                                                                                                                                                                                                                                                       |  |  |  |           |  |  |                 |     |   |   |             |  |  |  |              |  |  |  |              |  |  |  |     |   |         |         |  |   |         |         |  |   |         |         |  |   |         |         |   |         |   |         |  |         |   |         |  |         |   |         |  |         |   |         |   |         |         |   |  |         |         |   |  |         |         |   |  |         |         |   |                                                                                                                                                                                                                                                                                                                                                                                                                                                                                                                                                                                                                                                                                                                                                                                                                                                                                                                                                                                                                                                                                                                      |  |  |  |           |  |  |                 |     |   |   |             |  |  |  |              |  |  |  |              |  |  |  |     |   |         |         |  |   |         |         |  |   |        |         |  |   |         |         |   |         |   |         |  |         |   |         |  |         |   |         |  |         |   |         |   |         |         |   |  |         |         |   |  |         |         |   |  |         |         |   |
| 2                                                                                                                                                                                                                                                                                                                                                                                                                                                                                                                                                                                                                                                                                                                                                                                                                                                                                                                                                                                                                                                                                                                  | A       | 675.10689     |         |                                                                  |  |               |                 |                                                                  |           |     |             |           |     |   |              |                                                                                                                                                                                                                                                                        |  |  |              |       |  |               |     |   |           |         |   |           |         |         |           |                                                                                                                                                                                                                                                                        |         |         |  |       |        |               |   |         |           |         |   |           |     |         |           |         |   |         |  |         |   |         |   |         |         |   |  |         |         |   |  |         |         |   |  |         |         |   |                                                                                                                                                                                                                                                                                                                                                                                                                                                                                                                                                                                                                                                                                                                                                                                                                                                                                                                                                                                                                                                                                                                       |  |  |  |           |  |  |                 |     |   |   |             |  |  |  |              |  |  |  |              |  |  |  |     |   |         |         |  |   |         |         |  |   |         |         |  |   |         |         |   |         |   |         |  |         |   |         |  |         |   |         |  |         |   |         |   |         |         |   |  |         |         |   |  |         |         |   |  |         |         |   |                                                                                                                                                                                                                                                                                                                                                                                                                                                                                                                                                                                                                                                                                                                                                                                                                                                                                                                                                                                                                                                                                                                      |  |  |  |           |  |  |                 |     |   |   |             |  |  |  |              |  |  |  |              |  |  |  |     |   |         |         |  |   |         |         |  |   |        |         |  |   |         |         |   |         |   |         |  |         |   |         |  |         |   |         |  |         |   |         |   |         |         |   |  |         |         |   |  |         |         |   |  |         |         |   |
| 1                                                                                                                                                                                                                                                                                                                                                                                                                                                                                                                                                                                                                                                                                                                                                                                                                                                                                                                                                                                                                                                                                                                  | A       | 609.34338     |         |                                                                  |  |               |                 |                                                                  |           |     |             |           |     |   |              |                                                                                                                                                                                                                                                                        |  |  |              |       |  |               |     |   |           |         |   |           |         |         |           |                                                                                                                                                                                                                                                                        |         |         |  |       |        |               |   |         |           |         |   |           |     |         |           |         |   |         |  |         |   |         |   |         |         |   |  |         |         |   |  |         |         |   |  |         |         |   |                                                                                                                                                                                                                                                                                                                                                                                                                                                                                                                                                                                                                                                                                                                                                                                                                                                                                                                                                                                                                                                                                                                       |  |  |  |           |  |  |                 |     |   |   |             |  |  |  |              |  |  |  |              |  |  |  |     |   |         |         |  |   |         |         |  |   |         |         |  |   |         |         |   |         |   |         |  |         |   |         |  |         |   |         |  |         |   |         |   |         |         |   |  |         |         |   |  |         |         |   |  |         |         |   |                                                                                                                                                                                                                                                                                                                                                                                                                                                                                                                                                                                                                                                                                                                                                                                                                                                                                                                                                                                                                                                                                                                      |  |  |  |           |  |  |                 |     |   |   |             |  |  |  |              |  |  |  |              |  |  |  |     |   |         |         |  |   |         |         |  |   |        |         |  |   |         |         |   |         |   |         |  |         |   |         |  |         |   |         |  |         |   |         |   |         |         |   |  |         |         |   |  |         |         |   |  |         |         |   |
| 0.5                                                                                                                                                                                                                                                                                                                                                                                                                                                                                                                                                                                                                                                                                                                                                                                                                                                                                                                                                                                                                                                                                                                | A       | 575.64851     |         |                                                                  |  |               |                 |                                                                  |           |     |             |           |     |   |              |                                                                                                                                                                                                                                                                        |  |  |              |       |  |               |     |   |           |         |   |           |         |         |           |                                                                                                                                                                                                                                                                        |         |         |  |       |        |               |   |         |           |         |   |           |     |         |           |         |   |         |  |         |   |         |   |         |         |   |  |         |         |   |  |         |         |   |  |         |         |   |                                                                                                                                                                                                                                                                                                                                                                                                                                                                                                                                                                                                                                                                                                                                                                                                                                                                                                                                                                                                                                                                                                                       |  |  |  |           |  |  |                 |     |   |   |             |  |  |  |              |  |  |  |              |  |  |  |     |   |         |         |  |   |         |         |  |   |         |         |  |   |         |         |   |         |   |         |  |         |   |         |  |         |   |         |  |         |   |         |   |         |         |   |  |         |         |   |  |         |         |   |  |         |         |   |                                                                                                                                                                                                                                                                                                                                                                                                                                                                                                                                                                                                                                                                                                                                                                                                                                                                                                                                                                                                                                                                                                                      |  |  |  |           |  |  |                 |     |   |   |             |  |  |  |              |  |  |  |              |  |  |  |     |   |         |         |  |   |         |         |  |   |        |         |  |   |         |         |   |         |   |         |  |         |   |         |  |         |   |         |  |         |   |         |   |         |         |   |  |         |         |   |  |         |         |   |  |         |         |   |
| Levels not connected by same letter are significantly different.                                                                                                                                                                                                                                                                                                                                                                                                                                                                                                                                                                                                                                                                                                                                                                                                                                                                                                                                                                                                                                                   |         |               |         | Levels not connected by same letter are significantly different. |  |               |                 |                                                                  |           |     |             |           |     |   |              |                                                                                                                                                                                                                                                                        |  |  |              |       |  |               |     |   |           |         |   |           |         |         |           |                                                                                                                                                                                                                                                                        |         |         |  |       |        |               |   |         |           |         |   |           |     |         |           |         |   |         |  |         |   |         |   |         |         |   |  |         |         |   |  |         |         |   |  |         |         |   |                                                                                                                                                                                                                                                                                                                                                                                                                                                                                                                                                                                                                                                                                                                                                                                                                                                                                                                                                                                                                                                                                                                       |  |  |  |           |  |  |                 |     |   |   |             |  |  |  |              |  |  |  |              |  |  |  |     |   |         |         |  |   |         |         |  |   |         |         |  |   |         |         |   |         |   |         |  |         |   |         |  |         |   |         |  |         |   |         |   |         |         |   |  |         |         |   |  |         |         |   |  |         |         |   |                                                                                                                                                                                                                                                                                                                                                                                                                                                                                                                                                                                                                                                                                                                                                                                                                                                                                                                                                                                                                                                                                                                      |  |  |  |           |  |  |                 |     |   |   |             |  |  |  |              |  |  |  |              |  |  |  |     |   |         |         |  |   |         |         |  |   |        |         |  |   |         |         |   |         |   |         |  |         |   |         |  |         |   |         |  |         |   |         |   |         |         |   |  |         |         |   |  |         |         |   |  |         |         |   |

Table SI.2: Summary of Tukey multiple comparison statistics: overview of significantly different burst pressures between the five HBV configurations for each microchannel width.

| 0.5 mm                                                                                                                                                                                                                                                                                                                                                                                                                                                                                                                                                                                                                                                                                                                                                                                                                                                                                                                                                                                                                                                                                                                                                                                                                                                                                                                                                                                                                                                                                                                                                                                                                                                                                                                                                                                                                                                                                                                                                                                                                                                                                                                                                                                                                                                                                                                                                                                                   |         |               |         |         |         | 1.0 mm                                                           |  |               |       |   |                 | 2.0 mm                                                           |       |           |       |       |             |       |   |           |       |   |              |                                                                                                                                                                                                                                                                                                                                                                                          |  |  |  |  |              |       |  |               |       |   |           |       |         |           |         |        |           |       |         |           |         |         |           |                                                                                                                                                                                                                                                                                                                                                                                          |         |         |         |         |  |       |         |               |         |         |           |        |   |           |         |         |           |         |   |           |         |         |           |         |   |         |         |         |  |         |   |         |         |         |       |         |         |   |         |         |  |         |         |   |         |         |  |        |         |   |         |         |  |         |         |   |         |         |       |         |         |         |   |         |  |         |         |         |   |         |  |         |         |         |   |         |  |         |        |         |   |         |       |         |        |         |         |   |  |         |         |         |         |   |  |         |         |         |         |   |  |         |         |         |         |   |                                                                                                                                                                                                                                                                                                                                                                                                                                                                                                                                                                                                                                                                                                                                                                                                                                                                                                                                                                                                                                                                                                                                                                                                                                                                                                                                                                                                                                                                                                                                                                                                                                                                                                                                                                                                                                                                                                                                                                                                                                                                                                                                                                                                                                                                                                                                                                                                     |  |  |  |  |  |           |  |  |  |  |                 |       |       |       |       |       |             |  |  |  |  |  |              |  |  |  |  |  |              |  |  |  |  |  |       |   |         |         |         |         |  |   |         |         |        |         |  |   |         |         |         |         |  |   |        |         |         |         |       |         |   |         |         |         |  |         |   |        |         |         |  |         |   |         |         |         |  |         |   |         |         |         |       |         |         |   |         |         |  |         |        |   |         |         |  |         |        |   |         |         |  |         |         |   |         |         |       |         |         |         |   |         |  |        |         |         |   |        |  |         |        |        |   |         |  |         |         |         |   |         |       |         |         |         |         |   |  |         |         |         |        |   |  |         |         |         |         |   |  |         |         |         |         |   |                                                                                                                                                                                                                                                                                                                                                                                                                                                                                                                                                                                                                                                                                                                                                                                                                                                                                                                                                                                                                                                                                                                                                                                                                                                                                                                                                                                                                                                                                                                                                                                                                                                                                                                                                                                                                                                                                                                                                                                                                                                                                                                                                                                                                                                                                                                                                                                                           |  |  |  |  |  |           |  |  |  |  |                 |       |       |       |       |       |             |  |  |  |  |  |              |  |  |  |  |  |              |  |  |  |  |  |       |   |         |         |         |         |  |   |         |         |         |         |  |   |         |         |         |         |  |   |         |         |         |         |       |         |   |         |         |         |  |         |   |         |         |         |  |         |   |         |         |         |  |         |   |         |         |         |       |         |         |   |         |        |  |         |         |   |         |         |  |         |         |   |         |         |  |         |         |   |        |         |       |         |         |         |   |         |  |         |         |         |   |         |  |         |        |         |   |         |  |         |         |         |   |         |       |         |         |         |         |   |  |         |         |         |         |   |  |         |         |         |         |   |  |         |         |         |        |   |
|----------------------------------------------------------------------------------------------------------------------------------------------------------------------------------------------------------------------------------------------------------------------------------------------------------------------------------------------------------------------------------------------------------------------------------------------------------------------------------------------------------------------------------------------------------------------------------------------------------------------------------------------------------------------------------------------------------------------------------------------------------------------------------------------------------------------------------------------------------------------------------------------------------------------------------------------------------------------------------------------------------------------------------------------------------------------------------------------------------------------------------------------------------------------------------------------------------------------------------------------------------------------------------------------------------------------------------------------------------------------------------------------------------------------------------------------------------------------------------------------------------------------------------------------------------------------------------------------------------------------------------------------------------------------------------------------------------------------------------------------------------------------------------------------------------------------------------------------------------------------------------------------------------------------------------------------------------------------------------------------------------------------------------------------------------------------------------------------------------------------------------------------------------------------------------------------------------------------------------------------------------------------------------------------------------------------------------------------------------------------------------------------------------|---------|---------------|---------|---------|---------|------------------------------------------------------------------|--|---------------|-------|---|-----------------|------------------------------------------------------------------|-------|-----------|-------|-------|-------------|-------|---|-----------|-------|---|--------------|------------------------------------------------------------------------------------------------------------------------------------------------------------------------------------------------------------------------------------------------------------------------------------------------------------------------------------------------------------------------------------------|--|--|--|--|--------------|-------|--|---------------|-------|---|-----------|-------|---------|-----------|---------|--------|-----------|-------|---------|-----------|---------|---------|-----------|------------------------------------------------------------------------------------------------------------------------------------------------------------------------------------------------------------------------------------------------------------------------------------------------------------------------------------------------------------------------------------------|---------|---------|---------|---------|--|-------|---------|---------------|---------|---------|-----------|--------|---|-----------|---------|---------|-----------|---------|---|-----------|---------|---------|-----------|---------|---|---------|---------|---------|--|---------|---|---------|---------|---------|-------|---------|---------|---|---------|---------|--|---------|---------|---|---------|---------|--|--------|---------|---|---------|---------|--|---------|---------|---|---------|---------|-------|---------|---------|---------|---|---------|--|---------|---------|---------|---|---------|--|---------|---------|---------|---|---------|--|---------|--------|---------|---|---------|-------|---------|--------|---------|---------|---|--|---------|---------|---------|---------|---|--|---------|---------|---------|---------|---|--|---------|---------|---------|---------|---|-----------------------------------------------------------------------------------------------------------------------------------------------------------------------------------------------------------------------------------------------------------------------------------------------------------------------------------------------------------------------------------------------------------------------------------------------------------------------------------------------------------------------------------------------------------------------------------------------------------------------------------------------------------------------------------------------------------------------------------------------------------------------------------------------------------------------------------------------------------------------------------------------------------------------------------------------------------------------------------------------------------------------------------------------------------------------------------------------------------------------------------------------------------------------------------------------------------------------------------------------------------------------------------------------------------------------------------------------------------------------------------------------------------------------------------------------------------------------------------------------------------------------------------------------------------------------------------------------------------------------------------------------------------------------------------------------------------------------------------------------------------------------------------------------------------------------------------------------------------------------------------------------------------------------------------------------------------------------------------------------------------------------------------------------------------------------------------------------------------------------------------------------------------------------------------------------------------------------------------------------------------------------------------------------------------------------------------------------------------------------------------------------------|--|--|--|--|--|-----------|--|--|--|--|-----------------|-------|-------|-------|-------|-------|-------------|--|--|--|--|--|--------------|--|--|--|--|--|--------------|--|--|--|--|--|-------|---|---------|---------|---------|---------|--|---|---------|---------|--------|---------|--|---|---------|---------|---------|---------|--|---|--------|---------|---------|---------|-------|---------|---|---------|---------|---------|--|---------|---|--------|---------|---------|--|---------|---|---------|---------|---------|--|---------|---|---------|---------|---------|-------|---------|---------|---|---------|---------|--|---------|--------|---|---------|---------|--|---------|--------|---|---------|---------|--|---------|---------|---|---------|---------|-------|---------|---------|---------|---|---------|--|--------|---------|---------|---|--------|--|---------|--------|--------|---|---------|--|---------|---------|---------|---|---------|-------|---------|---------|---------|---------|---|--|---------|---------|---------|--------|---|--|---------|---------|---------|---------|---|--|---------|---------|---------|---------|---|-----------------------------------------------------------------------------------------------------------------------------------------------------------------------------------------------------------------------------------------------------------------------------------------------------------------------------------------------------------------------------------------------------------------------------------------------------------------------------------------------------------------------------------------------------------------------------------------------------------------------------------------------------------------------------------------------------------------------------------------------------------------------------------------------------------------------------------------------------------------------------------------------------------------------------------------------------------------------------------------------------------------------------------------------------------------------------------------------------------------------------------------------------------------------------------------------------------------------------------------------------------------------------------------------------------------------------------------------------------------------------------------------------------------------------------------------------------------------------------------------------------------------------------------------------------------------------------------------------------------------------------------------------------------------------------------------------------------------------------------------------------------------------------------------------------------------------------------------------------------------------------------------------------------------------------------------------------------------------------------------------------------------------------------------------------------------------------------------------------------------------------------------------------------------------------------------------------------------------------------------------------------------------------------------------------------------------------------------------------------------------------------------------------|--|--|--|--|--|-----------|--|--|--|--|-----------------|-------|-------|-------|-------|-------|-------------|--|--|--|--|--|--------------|--|--|--|--|--|--------------|--|--|--|--|--|-------|---|---------|---------|---------|---------|--|---|---------|---------|---------|---------|--|---|---------|---------|---------|---------|--|---|---------|---------|---------|---------|-------|---------|---|---------|---------|---------|--|---------|---|---------|---------|---------|--|---------|---|---------|---------|---------|--|---------|---|---------|---------|---------|-------|---------|---------|---|---------|--------|--|---------|---------|---|---------|---------|--|---------|---------|---|---------|---------|--|---------|---------|---|--------|---------|-------|---------|---------|---------|---|---------|--|---------|---------|---------|---|---------|--|---------|--------|---------|---|---------|--|---------|---------|---------|---|---------|-------|---------|---------|---------|---------|---|--|---------|---------|---------|---------|---|--|---------|---------|---------|---------|---|--|---------|---------|---------|--------|---|
| LSMeans Differences Tukey HSD                                                                                                                                                                                                                                                                                                                                                                                                                                                                                                                                                                                                                                                                                                                                                                                                                                                                                                                                                                                                                                                                                                                                                                                                                                                                                                                                                                                                                                                                                                                                                                                                                                                                                                                                                                                                                                                                                                                                                                                                                                                                                                                                                                                                                                                                                                                                                                            |         |               |         |         |         | LSMeans Differences Tukey HSD                                    |  |               |       |   |                 | LSMeans Differences Student's t                                  |       |           |       |       |             |       |   |           |       |   |              |                                                                                                                                                                                                                                                                                                                                                                                          |  |  |  |  |              |       |  |               |       |   |           |       |         |           |         |        |           |       |         |           |         |         |           |                                                                                                                                                                                                                                                                                                                                                                                          |         |         |         |         |  |       |         |               |         |         |           |        |   |           |         |         |           |         |   |           |         |         |           |         |   |         |         |         |  |         |   |         |         |         |       |         |         |   |         |         |  |         |         |   |         |         |  |        |         |   |         |         |  |         |         |   |         |         |       |         |         |         |   |         |  |         |         |         |   |         |  |         |         |         |   |         |  |         |        |         |   |         |       |         |        |         |         |   |  |         |         |         |         |   |  |         |         |         |         |   |  |         |         |         |         |   |                                                                                                                                                                                                                                                                                                                                                                                                                                                                                                                                                                                                                                                                                                                                                                                                                                                                                                                                                                                                                                                                                                                                                                                                                                                                                                                                                                                                                                                                                                                                                                                                                                                                                                                                                                                                                                                                                                                                                                                                                                                                                                                                                                                                                                                                                                                                                                                                     |  |  |  |  |  |           |  |  |  |  |                 |       |       |       |       |       |             |  |  |  |  |  |              |  |  |  |  |  |              |  |  |  |  |  |       |   |         |         |         |         |  |   |         |         |        |         |  |   |         |         |         |         |  |   |        |         |         |         |       |         |   |         |         |         |  |         |   |        |         |         |  |         |   |         |         |         |  |         |   |         |         |         |       |         |         |   |         |         |  |         |        |   |         |         |  |         |        |   |         |         |  |         |         |   |         |         |       |         |         |         |   |         |  |        |         |         |   |        |  |         |        |        |   |         |  |         |         |         |   |         |       |         |         |         |         |   |  |         |         |         |        |   |  |         |         |         |         |   |  |         |         |         |         |   |                                                                                                                                                                                                                                                                                                                                                                                                                                                                                                                                                                                                                                                                                                                                                                                                                                                                                                                                                                                                                                                                                                                                                                                                                                                                                                                                                                                                                                                                                                                                                                                                                                                                                                                                                                                                                                                                                                                                                                                                                                                                                                                                                                                                                                                                                                                                                                                                           |  |  |  |  |  |           |  |  |  |  |                 |       |       |       |       |       |             |  |  |  |  |  |              |  |  |  |  |  |              |  |  |  |  |  |       |   |         |         |         |         |  |   |         |         |         |         |  |   |         |         |         |         |  |   |         |         |         |         |       |         |   |         |         |         |  |         |   |         |         |         |  |         |   |         |         |         |  |         |   |         |         |         |       |         |         |   |         |        |  |         |         |   |         |         |  |         |         |   |         |         |  |         |         |   |        |         |       |         |         |         |   |         |  |         |         |         |   |         |  |         |        |         |   |         |  |         |         |         |   |         |       |         |         |         |         |   |  |         |         |         |         |   |  |         |         |         |         |   |  |         |         |         |        |   |
| α= 0.050 Q= 2.95603                                                                                                                                                                                                                                                                                                                                                                                                                                                                                                                                                                                                                                                                                                                                                                                                                                                                                                                                                                                                                                                                                                                                                                                                                                                                                                                                                                                                                                                                                                                                                                                                                                                                                                                                                                                                                                                                                                                                                                                                                                                                                                                                                                                                                                                                                                                                                                                      |         |               |         |         |         | α= 0.050 Q= 2.89482                                              |  |               |       |   |                 | α= 0.050 t= 2.05954                                              |       |           |       |       |             |       |   |           |       |   |              |                                                                                                                                                                                                                                                                                                                                                                                          |  |  |  |  |              |       |  |               |       |   |           |       |         |           |         |        |           |       |         |           |         |         |           |                                                                                                                                                                                                                                                                                                                                                                                          |         |         |         |         |  |       |         |               |         |         |           |        |   |           |         |         |           |         |   |           |         |         |           |         |   |         |         |         |  |         |   |         |         |         |       |         |         |   |         |         |  |         |         |   |         |         |  |        |         |   |         |         |  |         |         |   |         |         |       |         |         |         |   |         |  |         |         |         |   |         |  |         |         |         |   |         |  |         |        |         |   |         |       |         |        |         |         |   |  |         |         |         |         |   |  |         |         |         |         |   |  |         |         |         |         |   |                                                                                                                                                                                                                                                                                                                                                                                                                                                                                                                                                                                                                                                                                                                                                                                                                                                                                                                                                                                                                                                                                                                                                                                                                                                                                                                                                                                                                                                                                                                                                                                                                                                                                                                                                                                                                                                                                                                                                                                                                                                                                                                                                                                                                                                                                                                                                                                                     |  |  |  |  |  |           |  |  |  |  |                 |       |       |       |       |       |             |  |  |  |  |  |              |  |  |  |  |  |              |  |  |  |  |  |       |   |         |         |         |         |  |   |         |         |        |         |  |   |         |         |         |         |  |   |        |         |         |         |       |         |   |         |         |         |  |         |   |        |         |         |  |         |   |         |         |         |  |         |   |         |         |         |       |         |         |   |         |         |  |         |        |   |         |         |  |         |        |   |         |         |  |         |         |   |         |         |       |         |         |         |   |         |  |        |         |         |   |        |  |         |        |        |   |         |  |         |         |         |   |         |       |         |         |         |         |   |  |         |         |         |        |   |  |         |         |         |         |   |  |         |         |         |         |   |                                                                                                                                                                                                                                                                                                                                                                                                                                                                                                                                                                                                                                                                                                                                                                                                                                                                                                                                                                                                                                                                                                                                                                                                                                                                                                                                                                                                                                                                                                                                                                                                                                                                                                                                                                                                                                                                                                                                                                                                                                                                                                                                                                                                                                                                                                                                                                                                           |  |  |  |  |  |           |  |  |  |  |                 |       |       |       |       |       |             |  |  |  |  |  |              |  |  |  |  |  |              |  |  |  |  |  |       |   |         |         |         |         |  |   |         |         |         |         |  |   |         |         |         |         |  |   |         |         |         |         |       |         |   |         |         |         |  |         |   |         |         |         |  |         |   |         |         |         |  |         |   |         |         |         |       |         |         |   |         |        |  |         |         |   |         |         |  |         |         |   |         |         |  |         |         |   |        |         |       |         |         |         |   |         |  |         |         |         |   |         |  |         |        |         |   |         |  |         |         |         |   |         |       |         |         |         |         |   |  |         |         |         |         |   |  |         |         |         |         |   |  |         |         |         |        |   |
| <table border="1"> <thead> <tr><th colspan="5">LSMean[j]</th></tr> <tr><th>Mean[j]-Mean[j]</th><th>Aq-FI</th><th>Dc Aq</th><th>Dc FI</th><th>Sc Aq</th><th>Sc FI</th></tr> <tr><th>Std Err Dif</th><td></td><td></td><td></td><td></td><td></td></tr> <tr><th>Lower CL Dif</th><td></td><td></td><td></td><td></td><td></td></tr> <tr><th>Upper CL Dif</th><td></td><td></td><td></td><td></td><td></td></tr> </thead> <tbody> <tr><td>Aq-FI</td><td>0</td><td>73.1205</td><td>-141.19</td><td>274.137</td><td>106.95</td></tr> <tr><td></td><td>0</td><td>33.9975</td><td>33.9975</td><td>33.9975</td><td>35.5092</td></tr> <tr><td></td><td>0</td><td>-27.377</td><td>-241.69</td><td>173.639</td><td>1.98384</td></tr> <tr><td></td><td>0</td><td>173.618</td><td>-40.697</td><td>374.634</td><td>211.916</td></tr> <tr><td>Dc Aq</td><td>-73.12</td><td>0</td><td>-214.32</td><td>201.016</td><td>33.8296</td></tr> <tr><td></td><td>33.9975</td><td>0</td><td>32.4154</td><td>32.4154</td><td>33.9975</td></tr> <tr><td></td><td>-173.62</td><td>0</td><td>-310.14</td><td>105.196</td><td>-66.668</td></tr> <tr><td></td><td>27.3771</td><td>0</td><td>-118.49</td><td>296.837</td><td>134.327</td></tr> <tr><td>Dc FI</td><td>141.195</td><td>214.315</td><td>0</td><td>415.331</td><td>248.145</td></tr> <tr><td></td><td>33.9975</td><td>32.4154</td><td>0</td><td>32.4154</td><td>33.9975</td></tr> <tr><td></td><td>40.697</td><td>118.494</td><td>0</td><td>319.511</td><td>147.647</td></tr> <tr><td></td><td>241.692</td><td>310.136</td><td>0</td><td>511.152</td><td>348.642</td></tr> <tr><td>Sc Aq</td><td>-274.14</td><td>-201.02</td><td>-415.33</td><td>0</td><td>-167.19</td></tr> <tr><td></td><td>33.9975</td><td>32.4154</td><td>32.4154</td><td>0</td><td>33.9975</td></tr> <tr><td></td><td>-374.63</td><td>-296.84</td><td>-511.15</td><td>0</td><td>-267.68</td></tr> <tr><td></td><td>-173.64</td><td>-105.2</td><td>-319.51</td><td>0</td><td>-66.689</td></tr> <tr><td>Sc FI</td><td>-106.95</td><td>-33.83</td><td>-248.14</td><td>167.187</td><td>0</td></tr> <tr><td></td><td>35.5092</td><td>33.9975</td><td>33.9975</td><td>33.9975</td><td>0</td></tr> <tr><td></td><td>-211.92</td><td>-134.33</td><td>-348.64</td><td>66.6891</td><td>0</td></tr> <tr><td></td><td>-1.9838</td><td>66.6679</td><td>-147.65</td><td>267.684</td><td>0</td></tr> </tbody> </table> |         |               |         |         |         | LSMean[j]                                                        |  |               |       |   | Mean[j]-Mean[j] | Aq-FI                                                            | Dc Aq | Dc FI     | Sc Aq | Sc FI | Std Err Dif |       |   |           |       |   | Lower CL Dif |                                                                                                                                                                                                                                                                                                                                                                                          |  |  |  |  | Upper CL Dif |       |  |               |       |   | Aq-FI     | 0     | 73.1205 | -141.19   | 274.137 | 106.95 |           | 0     | 33.9975 | 33.9975   | 33.9975 | 35.5092 |           | 0                                                                                                                                                                                                                                                                                                                                                                                        | -27.377 | -241.69 | 173.639 | 1.98384 |  | 0     | 173.618 | -40.697       | 374.634 | 211.916 | Dc Aq     | -73.12 | 0 | -214.32   | 201.016 | 33.8296 |           | 33.9975 | 0 | 32.4154   | 32.4154 | 33.9975 |           | -173.62 | 0 | -310.14 | 105.196 | -66.668 |  | 27.3771 | 0 | -118.49 | 296.837 | 134.327 | Dc FI | 141.195 | 214.315 | 0 | 415.331 | 248.145 |  | 33.9975 | 32.4154 | 0 | 32.4154 | 33.9975 |  | 40.697 | 118.494 | 0 | 319.511 | 147.647 |  | 241.692 | 310.136 | 0 | 511.152 | 348.642 | Sc Aq | -274.14 | -201.02 | -415.33 | 0 | -167.19 |  | 33.9975 | 32.4154 | 32.4154 | 0 | 33.9975 |  | -374.63 | -296.84 | -511.15 | 0 | -267.68 |  | -173.64 | -105.2 | -319.51 | 0 | -66.689 | Sc FI | -106.95 | -33.83 | -248.14 | 167.187 | 0 |  | 35.5092 | 33.9975 | 33.9975 | 33.9975 | 0 |  | -211.92 | -134.33 | -348.64 | 66.6891 | 0 |  | -1.9838 | 66.6679 | -147.65 | 267.684 | 0 | <table border="1"> <thead> <tr><th colspan="5">LSMean[j]</th></tr> <tr><th>Mean[j]-Mean[j]</th><th>Aq-FI</th><th>Dc Aq</th><th>Dc FI</th><th>Sc Aq</th><th>Sc FI</th></tr> <tr><th>Std Err Dif</th><td></td><td></td><td></td><td></td><td></td></tr> <tr><th>Lower CL Dif</th><td></td><td></td><td></td><td></td><td></td></tr> <tr><th>Upper CL Dif</th><td></td><td></td><td></td><td></td><td></td></tr> </thead> <tbody> <tr><td>Aq-FI</td><td>0</td><td>89.7743</td><td>-150.35</td><td>284.213</td><td>120.766</td></tr> <tr><td></td><td>0</td><td>21.4229</td><td>24.0199</td><td>20.132</td><td>22.9021</td></tr> <tr><td></td><td>0</td><td>27.7589</td><td>-219.88</td><td>225.934</td><td>54.4688</td></tr> <tr><td></td><td>0</td><td>151.79</td><td>-80.816</td><td>342.491</td><td>187.063</td></tr> <tr><td>Dc Aq</td><td>-89.774</td><td>0</td><td>-240.12</td><td>194.439</td><td>30.9918</td></tr> <tr><td></td><td>21.4229</td><td>0</td><td>22.614</td><td>18.4319</td><td>21.4229</td></tr> <tr><td></td><td>-151.79</td><td>0</td><td>-305.59</td><td>141.082</td><td>-31.024</td></tr> <tr><td></td><td>-27.759</td><td>0</td><td>-174.66</td><td>247.796</td><td>93.0072</td></tr> <tr><td>Dc FI</td><td>150.349</td><td>240.123</td><td>0</td><td>434.562</td><td>271.115</td></tr> <tr><td></td><td>24.0199</td><td>22.614</td><td>0</td><td>21.3951</td><td>24.0199</td></tr> <tr><td></td><td>80.8161</td><td>174.66</td><td>0</td><td>372.627</td><td>201.582</td></tr> <tr><td></td><td>219.882</td><td>305.587</td><td>0</td><td>496.497</td><td>340.648</td></tr> <tr><td>Sc Aq</td><td>-284.21</td><td>-194.44</td><td>-434.56</td><td>0</td><td>-163.45</td></tr> <tr><td></td><td>20.132</td><td>18.4319</td><td>21.3951</td><td>0</td><td>20.132</td></tr> <tr><td></td><td>-342.49</td><td>-247.8</td><td>-496.5</td><td>0</td><td>-221.73</td></tr> <tr><td></td><td>-225.93</td><td>-141.08</td><td>-372.63</td><td>0</td><td>-105.17</td></tr> <tr><td>Sc FI</td><td>-120.77</td><td>-30.992</td><td>-271.12</td><td>163.447</td><td>0</td></tr> <tr><td></td><td>22.9021</td><td>21.4229</td><td>24.0199</td><td>20.132</td><td>0</td></tr> <tr><td></td><td>-187.06</td><td>-93.007</td><td>-340.65</td><td>105.168</td><td>0</td></tr> <tr><td></td><td>-54.469</td><td>31.0236</td><td>-201.58</td><td>221.725</td><td>0</td></tr> </tbody> </table> |  |  |  |  |  | LSMean[j] |  |  |  |  | Mean[j]-Mean[j] | Aq-FI | Dc Aq | Dc FI | Sc Aq | Sc FI | Std Err Dif |  |  |  |  |  | Lower CL Dif |  |  |  |  |  | Upper CL Dif |  |  |  |  |  | Aq-FI | 0 | 89.7743 | -150.35 | 284.213 | 120.766 |  | 0 | 21.4229 | 24.0199 | 20.132 | 22.9021 |  | 0 | 27.7589 | -219.88 | 225.934 | 54.4688 |  | 0 | 151.79 | -80.816 | 342.491 | 187.063 | Dc Aq | -89.774 | 0 | -240.12 | 194.439 | 30.9918 |  | 21.4229 | 0 | 22.614 | 18.4319 | 21.4229 |  | -151.79 | 0 | -305.59 | 141.082 | -31.024 |  | -27.759 | 0 | -174.66 | 247.796 | 93.0072 | Dc FI | 150.349 | 240.123 | 0 | 434.562 | 271.115 |  | 24.0199 | 22.614 | 0 | 21.3951 | 24.0199 |  | 80.8161 | 174.66 | 0 | 372.627 | 201.582 |  | 219.882 | 305.587 | 0 | 496.497 | 340.648 | Sc Aq | -284.21 | -194.44 | -434.56 | 0 | -163.45 |  | 20.132 | 18.4319 | 21.3951 | 0 | 20.132 |  | -342.49 | -247.8 | -496.5 | 0 | -221.73 |  | -225.93 | -141.08 | -372.63 | 0 | -105.17 | Sc FI | -120.77 | -30.992 | -271.12 | 163.447 | 0 |  | 22.9021 | 21.4229 | 24.0199 | 20.132 | 0 |  | -187.06 | -93.007 | -340.65 | 105.168 | 0 |  | -54.469 | 31.0236 | -201.58 | 221.725 | 0 | <table border="1"> <thead> <tr><th colspan="5">LSMean[j]</th></tr> <tr><th>Mean[j]-Mean[j]</th><th>Aq-FI</th><th>Dc Aq</th><th>Dc FI</th><th>Sc Aq</th><th>Sc FI</th></tr> <tr><th>Std Err Dif</th><td></td><td></td><td></td><td></td><td></td></tr> <tr><th>Lower CL Dif</th><td></td><td></td><td></td><td></td><td></td></tr> <tr><th>Upper CL Dif</th><td></td><td></td><td></td><td></td><td></td></tr> </thead> <tbody> <tr><td>Aq-FI</td><td>0</td><td>130.227</td><td>-122.16</td><td>392.849</td><td>202.465</td></tr> <tr><td></td><td>0</td><td>16.8027</td><td>16.8027</td><td>14.6248</td><td>16.8027</td></tr> <tr><td></td><td>0</td><td>95.6216</td><td>-156.77</td><td>362.728</td><td>167.859</td></tr> <tr><td></td><td>0</td><td>164.833</td><td>-87.559</td><td>422.969</td><td>237.071</td></tr> <tr><td>Dc Aq</td><td>-130.23</td><td>0</td><td>-252.39</td><td>262.621</td><td>72.2378</td></tr> <tr><td></td><td>16.8027</td><td>0</td><td>17.5498</td><td>15.4775</td><td>17.5498</td></tr> <tr><td></td><td>-164.83</td><td>0</td><td>-288.54</td><td>230.745</td><td>36.0933</td></tr> <tr><td></td><td>-95.622</td><td>0</td><td>-216.25</td><td>294.498</td><td>108.382</td></tr> <tr><td>Dc FI</td><td>122.165</td><td>252.392</td><td>0</td><td>515.014</td><td>324.63</td></tr> <tr><td></td><td>16.8027</td><td>17.5498</td><td>0</td><td>15.4775</td><td>17.5498</td></tr> <tr><td></td><td>87.5593</td><td>216.248</td><td>0</td><td>483.137</td><td>288.486</td></tr> <tr><td></td><td>156.771</td><td>288.537</td><td>0</td><td>546.89</td><td>360.775</td></tr> <tr><td>Sc Aq</td><td>-392.85</td><td>-262.62</td><td>-515.01</td><td>0</td><td>-190.38</td></tr> <tr><td></td><td>14.6248</td><td>15.4775</td><td>15.4775</td><td>0</td><td>15.4775</td></tr> <tr><td></td><td>-422.97</td><td>-294.5</td><td>-546.89</td><td>0</td><td>-222.26</td></tr> <tr><td></td><td>-362.73</td><td>-230.74</td><td>-483.14</td><td>0</td><td>-158.51</td></tr> <tr><td>Sc FI</td><td>-202.47</td><td>-72.238</td><td>-324.63</td><td>190.384</td><td>0</td></tr> <tr><td></td><td>16.8027</td><td>17.5498</td><td>17.5498</td><td>15.4775</td><td>0</td></tr> <tr><td></td><td>-237.07</td><td>-108.38</td><td>-360.77</td><td>158.507</td><td>0</td></tr> <tr><td></td><td>-167.86</td><td>-36.093</td><td>-288.49</td><td>222.26</td><td>0</td></tr> </tbody> </table> |  |  |  |  |  | LSMean[j] |  |  |  |  | Mean[j]-Mean[j] | Aq-FI | Dc Aq | Dc FI | Sc Aq | Sc FI | Std Err Dif |  |  |  |  |  | Lower CL Dif |  |  |  |  |  | Upper CL Dif |  |  |  |  |  | Aq-FI | 0 | 130.227 | -122.16 | 392.849 | 202.465 |  | 0 | 16.8027 | 16.8027 | 14.6248 | 16.8027 |  | 0 | 95.6216 | -156.77 | 362.728 | 167.859 |  | 0 | 164.833 | -87.559 | 422.969 | 237.071 | Dc Aq | -130.23 | 0 | -252.39 | 262.621 | 72.2378 |  | 16.8027 | 0 | 17.5498 | 15.4775 | 17.5498 |  | -164.83 | 0 | -288.54 | 230.745 | 36.0933 |  | -95.622 | 0 | -216.25 | 294.498 | 108.382 | Dc FI | 122.165 | 252.392 | 0 | 515.014 | 324.63 |  | 16.8027 | 17.5498 | 0 | 15.4775 | 17.5498 |  | 87.5593 | 216.248 | 0 | 483.137 | 288.486 |  | 156.771 | 288.537 | 0 | 546.89 | 360.775 | Sc Aq | -392.85 | -262.62 | -515.01 | 0 | -190.38 |  | 14.6248 | 15.4775 | 15.4775 | 0 | 15.4775 |  | -422.97 | -294.5 | -546.89 | 0 | -222.26 |  | -362.73 | -230.74 | -483.14 | 0 | -158.51 | Sc FI | -202.47 | -72.238 | -324.63 | 190.384 | 0 |  | 16.8027 | 17.5498 | 17.5498 | 15.4775 | 0 |  | -237.07 | -108.38 | -360.77 | 158.507 | 0 |  | -167.86 | -36.093 | -288.49 | 222.26 | 0 |
| LSMean[j]                                                                                                                                                                                                                                                                                                                                                                                                                                                                                                                                                                                                                                                                                                                                                                                                                                                                                                                                                                                                                                                                                                                                                                                                                                                                                                                                                                                                                                                                                                                                                                                                                                                                                                                                                                                                                                                                                                                                                                                                                                                                                                                                                                                                                                                                                                                                                                                                |         |               |         |         |         |                                                                  |  |               |       |   |                 |                                                                  |       |           |       |       |             |       |   |           |       |   |              |                                                                                                                                                                                                                                                                                                                                                                                          |  |  |  |  |              |       |  |               |       |   |           |       |         |           |         |        |           |       |         |           |         |         |           |                                                                                                                                                                                                                                                                                                                                                                                          |         |         |         |         |  |       |         |               |         |         |           |        |   |           |         |         |           |         |   |           |         |         |           |         |   |         |         |         |  |         |   |         |         |         |       |         |         |   |         |         |  |         |         |   |         |         |  |        |         |   |         |         |  |         |         |   |         |         |       |         |         |         |   |         |  |         |         |         |   |         |  |         |         |         |   |         |  |         |        |         |   |         |       |         |        |         |         |   |  |         |         |         |         |   |  |         |         |         |         |   |  |         |         |         |         |   |                                                                                                                                                                                                                                                                                                                                                                                                                                                                                                                                                                                                                                                                                                                                                                                                                                                                                                                                                                                                                                                                                                                                                                                                                                                                                                                                                                                                                                                                                                                                                                                                                                                                                                                                                                                                                                                                                                                                                                                                                                                                                                                                                                                                                                                                                                                                                                                                     |  |  |  |  |  |           |  |  |  |  |                 |       |       |       |       |       |             |  |  |  |  |  |              |  |  |  |  |  |              |  |  |  |  |  |       |   |         |         |         |         |  |   |         |         |        |         |  |   |         |         |         |         |  |   |        |         |         |         |       |         |   |         |         |         |  |         |   |        |         |         |  |         |   |         |         |         |  |         |   |         |         |         |       |         |         |   |         |         |  |         |        |   |         |         |  |         |        |   |         |         |  |         |         |   |         |         |       |         |         |         |   |         |  |        |         |         |   |        |  |         |        |        |   |         |  |         |         |         |   |         |       |         |         |         |         |   |  |         |         |         |        |   |  |         |         |         |         |   |  |         |         |         |         |   |                                                                                                                                                                                                                                                                                                                                                                                                                                                                                                                                                                                                                                                                                                                                                                                                                                                                                                                                                                                                                                                                                                                                                                                                                                                                                                                                                                                                                                                                                                                                                                                                                                                                                                                                                                                                                                                                                                                                                                                                                                                                                                                                                                                                                                                                                                                                                                                                           |  |  |  |  |  |           |  |  |  |  |                 |       |       |       |       |       |             |  |  |  |  |  |              |  |  |  |  |  |              |  |  |  |  |  |       |   |         |         |         |         |  |   |         |         |         |         |  |   |         |         |         |         |  |   |         |         |         |         |       |         |   |         |         |         |  |         |   |         |         |         |  |         |   |         |         |         |  |         |   |         |         |         |       |         |         |   |         |        |  |         |         |   |         |         |  |         |         |   |         |         |  |         |         |   |        |         |       |         |         |         |   |         |  |         |         |         |   |         |  |         |        |         |   |         |  |         |         |         |   |         |       |         |         |         |         |   |  |         |         |         |         |   |  |         |         |         |         |   |  |         |         |         |        |   |
| Mean[j]-Mean[j]                                                                                                                                                                                                                                                                                                                                                                                                                                                                                                                                                                                                                                                                                                                                                                                                                                                                                                                                                                                                                                                                                                                                                                                                                                                                                                                                                                                                                                                                                                                                                                                                                                                                                                                                                                                                                                                                                                                                                                                                                                                                                                                                                                                                                                                                                                                                                                                          | Aq-FI   | Dc Aq         | Dc FI   | Sc Aq   | Sc FI   |                                                                  |  |               |       |   |                 |                                                                  |       |           |       |       |             |       |   |           |       |   |              |                                                                                                                                                                                                                                                                                                                                                                                          |  |  |  |  |              |       |  |               |       |   |           |       |         |           |         |        |           |       |         |           |         |         |           |                                                                                                                                                                                                                                                                                                                                                                                          |         |         |         |         |  |       |         |               |         |         |           |        |   |           |         |         |           |         |   |           |         |         |           |         |   |         |         |         |  |         |   |         |         |         |       |         |         |   |         |         |  |         |         |   |         |         |  |        |         |   |         |         |  |         |         |   |         |         |       |         |         |         |   |         |  |         |         |         |   |         |  |         |         |         |   |         |  |         |        |         |   |         |       |         |        |         |         |   |  |         |         |         |         |   |  |         |         |         |         |   |  |         |         |         |         |   |                                                                                                                                                                                                                                                                                                                                                                                                                                                                                                                                                                                                                                                                                                                                                                                                                                                                                                                                                                                                                                                                                                                                                                                                                                                                                                                                                                                                                                                                                                                                                                                                                                                                                                                                                                                                                                                                                                                                                                                                                                                                                                                                                                                                                                                                                                                                                                                                     |  |  |  |  |  |           |  |  |  |  |                 |       |       |       |       |       |             |  |  |  |  |  |              |  |  |  |  |  |              |  |  |  |  |  |       |   |         |         |         |         |  |   |         |         |        |         |  |   |         |         |         |         |  |   |        |         |         |         |       |         |   |         |         |         |  |         |   |        |         |         |  |         |   |         |         |         |  |         |   |         |         |         |       |         |         |   |         |         |  |         |        |   |         |         |  |         |        |   |         |         |  |         |         |   |         |         |       |         |         |         |   |         |  |        |         |         |   |        |  |         |        |        |   |         |  |         |         |         |   |         |       |         |         |         |         |   |  |         |         |         |        |   |  |         |         |         |         |   |  |         |         |         |         |   |                                                                                                                                                                                                                                                                                                                                                                                                                                                                                                                                                                                                                                                                                                                                                                                                                                                                                                                                                                                                                                                                                                                                                                                                                                                                                                                                                                                                                                                                                                                                                                                                                                                                                                                                                                                                                                                                                                                                                                                                                                                                                                                                                                                                                                                                                                                                                                                                           |  |  |  |  |  |           |  |  |  |  |                 |       |       |       |       |       |             |  |  |  |  |  |              |  |  |  |  |  |              |  |  |  |  |  |       |   |         |         |         |         |  |   |         |         |         |         |  |   |         |         |         |         |  |   |         |         |         |         |       |         |   |         |         |         |  |         |   |         |         |         |  |         |   |         |         |         |  |         |   |         |         |         |       |         |         |   |         |        |  |         |         |   |         |         |  |         |         |   |         |         |  |         |         |   |        |         |       |         |         |         |   |         |  |         |         |         |   |         |  |         |        |         |   |         |  |         |         |         |   |         |       |         |         |         |         |   |  |         |         |         |         |   |  |         |         |         |         |   |  |         |         |         |        |   |
| Std Err Dif                                                                                                                                                                                                                                                                                                                                                                                                                                                                                                                                                                                                                                                                                                                                                                                                                                                                                                                                                                                                                                                                                                                                                                                                                                                                                                                                                                                                                                                                                                                                                                                                                                                                                                                                                                                                                                                                                                                                                                                                                                                                                                                                                                                                                                                                                                                                                                                              |         |               |         |         |         |                                                                  |  |               |       |   |                 |                                                                  |       |           |       |       |             |       |   |           |       |   |              |                                                                                                                                                                                                                                                                                                                                                                                          |  |  |  |  |              |       |  |               |       |   |           |       |         |           |         |        |           |       |         |           |         |         |           |                                                                                                                                                                                                                                                                                                                                                                                          |         |         |         |         |  |       |         |               |         |         |           |        |   |           |         |         |           |         |   |           |         |         |           |         |   |         |         |         |  |         |   |         |         |         |       |         |         |   |         |         |  |         |         |   |         |         |  |        |         |   |         |         |  |         |         |   |         |         |       |         |         |         |   |         |  |         |         |         |   |         |  |         |         |         |   |         |  |         |        |         |   |         |       |         |        |         |         |   |  |         |         |         |         |   |  |         |         |         |         |   |  |         |         |         |         |   |                                                                                                                                                                                                                                                                                                                                                                                                                                                                                                                                                                                                                                                                                                                                                                                                                                                                                                                                                                                                                                                                                                                                                                                                                                                                                                                                                                                                                                                                                                                                                                                                                                                                                                                                                                                                                                                                                                                                                                                                                                                                                                                                                                                                                                                                                                                                                                                                     |  |  |  |  |  |           |  |  |  |  |                 |       |       |       |       |       |             |  |  |  |  |  |              |  |  |  |  |  |              |  |  |  |  |  |       |   |         |         |         |         |  |   |         |         |        |         |  |   |         |         |         |         |  |   |        |         |         |         |       |         |   |         |         |         |  |         |   |        |         |         |  |         |   |         |         |         |  |         |   |         |         |         |       |         |         |   |         |         |  |         |        |   |         |         |  |         |        |   |         |         |  |         |         |   |         |         |       |         |         |         |   |         |  |        |         |         |   |        |  |         |        |        |   |         |  |         |         |         |   |         |       |         |         |         |         |   |  |         |         |         |        |   |  |         |         |         |         |   |  |         |         |         |         |   |                                                                                                                                                                                                                                                                                                                                                                                                                                                                                                                                                                                                                                                                                                                                                                                                                                                                                                                                                                                                                                                                                                                                                                                                                                                                                                                                                                                                                                                                                                                                                                                                                                                                                                                                                                                                                                                                                                                                                                                                                                                                                                                                                                                                                                                                                                                                                                                                           |  |  |  |  |  |           |  |  |  |  |                 |       |       |       |       |       |             |  |  |  |  |  |              |  |  |  |  |  |              |  |  |  |  |  |       |   |         |         |         |         |  |   |         |         |         |         |  |   |         |         |         |         |  |   |         |         |         |         |       |         |   |         |         |         |  |         |   |         |         |         |  |         |   |         |         |         |  |         |   |         |         |         |       |         |         |   |         |        |  |         |         |   |         |         |  |         |         |   |         |         |  |         |         |   |        |         |       |         |         |         |   |         |  |         |         |         |   |         |  |         |        |         |   |         |  |         |         |         |   |         |       |         |         |         |         |   |  |         |         |         |         |   |  |         |         |         |         |   |  |         |         |         |        |   |
| Lower CL Dif                                                                                                                                                                                                                                                                                                                                                                                                                                                                                                                                                                                                                                                                                                                                                                                                                                                                                                                                                                                                                                                                                                                                                                                                                                                                                                                                                                                                                                                                                                                                                                                                                                                                                                                                                                                                                                                                                                                                                                                                                                                                                                                                                                                                                                                                                                                                                                                             |         |               |         |         |         |                                                                  |  |               |       |   |                 |                                                                  |       |           |       |       |             |       |   |           |       |   |              |                                                                                                                                                                                                                                                                                                                                                                                          |  |  |  |  |              |       |  |               |       |   |           |       |         |           |         |        |           |       |         |           |         |         |           |                                                                                                                                                                                                                                                                                                                                                                                          |         |         |         |         |  |       |         |               |         |         |           |        |   |           |         |         |           |         |   |           |         |         |           |         |   |         |         |         |  |         |   |         |         |         |       |         |         |   |         |         |  |         |         |   |         |         |  |        |         |   |         |         |  |         |         |   |         |         |       |         |         |         |   |         |  |         |         |         |   |         |  |         |         |         |   |         |  |         |        |         |   |         |       |         |        |         |         |   |  |         |         |         |         |   |  |         |         |         |         |   |  |         |         |         |         |   |                                                                                                                                                                                                                                                                                                                                                                                                                                                                                                                                                                                                                                                                                                                                                                                                                                                                                                                                                                                                                                                                                                                                                                                                                                                                                                                                                                                                                                                                                                                                                                                                                                                                                                                                                                                                                                                                                                                                                                                                                                                                                                                                                                                                                                                                                                                                                                                                     |  |  |  |  |  |           |  |  |  |  |                 |       |       |       |       |       |             |  |  |  |  |  |              |  |  |  |  |  |              |  |  |  |  |  |       |   |         |         |         |         |  |   |         |         |        |         |  |   |         |         |         |         |  |   |        |         |         |         |       |         |   |         |         |         |  |         |   |        |         |         |  |         |   |         |         |         |  |         |   |         |         |         |       |         |         |   |         |         |  |         |        |   |         |         |  |         |        |   |         |         |  |         |         |   |         |         |       |         |         |         |   |         |  |        |         |         |   |        |  |         |        |        |   |         |  |         |         |         |   |         |       |         |         |         |         |   |  |         |         |         |        |   |  |         |         |         |         |   |  |         |         |         |         |   |                                                                                                                                                                                                                                                                                                                                                                                                                                                                                                                                                                                                                                                                                                                                                                                                                                                                                                                                                                                                                                                                                                                                                                                                                                                                                                                                                                                                                                                                                                                                                                                                                                                                                                                                                                                                                                                                                                                                                                                                                                                                                                                                                                                                                                                                                                                                                                                                           |  |  |  |  |  |           |  |  |  |  |                 |       |       |       |       |       |             |  |  |  |  |  |              |  |  |  |  |  |              |  |  |  |  |  |       |   |         |         |         |         |  |   |         |         |         |         |  |   |         |         |         |         |  |   |         |         |         |         |       |         |   |         |         |         |  |         |   |         |         |         |  |         |   |         |         |         |  |         |   |         |         |         |       |         |         |   |         |        |  |         |         |   |         |         |  |         |         |   |         |         |  |         |         |   |        |         |       |         |         |         |   |         |  |         |         |         |   |         |  |         |        |         |   |         |  |         |         |         |   |         |       |         |         |         |         |   |  |         |         |         |         |   |  |         |         |         |         |   |  |         |         |         |        |   |
| Upper CL Dif                                                                                                                                                                                                                                                                                                                                                                                                                                                                                                                                                                                                                                                                                                                                                                                                                                                                                                                                                                                                                                                                                                                                                                                                                                                                                                                                                                                                                                                                                                                                                                                                                                                                                                                                                                                                                                                                                                                                                                                                                                                                                                                                                                                                                                                                                                                                                                                             |         |               |         |         |         |                                                                  |  |               |       |   |                 |                                                                  |       |           |       |       |             |       |   |           |       |   |              |                                                                                                                                                                                                                                                                                                                                                                                          |  |  |  |  |              |       |  |               |       |   |           |       |         |           |         |        |           |       |         |           |         |         |           |                                                                                                                                                                                                                                                                                                                                                                                          |         |         |         |         |  |       |         |               |         |         |           |        |   |           |         |         |           |         |   |           |         |         |           |         |   |         |         |         |  |         |   |         |         |         |       |         |         |   |         |         |  |         |         |   |         |         |  |        |         |   |         |         |  |         |         |   |         |         |       |         |         |         |   |         |  |         |         |         |   |         |  |         |         |         |   |         |  |         |        |         |   |         |       |         |        |         |         |   |  |         |         |         |         |   |  |         |         |         |         |   |  |         |         |         |         |   |                                                                                                                                                                                                                                                                                                                                                                                                                                                                                                                                                                                                                                                                                                                                                                                                                                                                                                                                                                                                                                                                                                                                                                                                                                                                                                                                                                                                                                                                                                                                                                                                                                                                                                                                                                                                                                                                                                                                                                                                                                                                                                                                                                                                                                                                                                                                                                                                     |  |  |  |  |  |           |  |  |  |  |                 |       |       |       |       |       |             |  |  |  |  |  |              |  |  |  |  |  |              |  |  |  |  |  |       |   |         |         |         |         |  |   |         |         |        |         |  |   |         |         |         |         |  |   |        |         |         |         |       |         |   |         |         |         |  |         |   |        |         |         |  |         |   |         |         |         |  |         |   |         |         |         |       |         |         |   |         |         |  |         |        |   |         |         |  |         |        |   |         |         |  |         |         |   |         |         |       |         |         |         |   |         |  |        |         |         |   |        |  |         |        |        |   |         |  |         |         |         |   |         |       |         |         |         |         |   |  |         |         |         |        |   |  |         |         |         |         |   |  |         |         |         |         |   |                                                                                                                                                                                                                                                                                                                                                                                                                                                                                                                                                                                                                                                                                                                                                                                                                                                                                                                                                                                                                                                                                                                                                                                                                                                                                                                                                                                                                                                                                                                                                                                                                                                                                                                                                                                                                                                                                                                                                                                                                                                                                                                                                                                                                                                                                                                                                                                                           |  |  |  |  |  |           |  |  |  |  |                 |       |       |       |       |       |             |  |  |  |  |  |              |  |  |  |  |  |              |  |  |  |  |  |       |   |         |         |         |         |  |   |         |         |         |         |  |   |         |         |         |         |  |   |         |         |         |         |       |         |   |         |         |         |  |         |   |         |         |         |  |         |   |         |         |         |  |         |   |         |         |         |       |         |         |   |         |        |  |         |         |   |         |         |  |         |         |   |         |         |  |         |         |   |        |         |       |         |         |         |   |         |  |         |         |         |   |         |  |         |        |         |   |         |  |         |         |         |   |         |       |         |         |         |         |   |  |         |         |         |         |   |  |         |         |         |         |   |  |         |         |         |        |   |
| Aq-FI                                                                                                                                                                                                                                                                                                                                                                                                                                                                                                                                                                                                                                                                                                                                                                                                                                                                                                                                                                                                                                                                                                                                                                                                                                                                                                                                                                                                                                                                                                                                                                                                                                                                                                                                                                                                                                                                                                                                                                                                                                                                                                                                                                                                                                                                                                                                                                                                    | 0       | 73.1205       | -141.19 | 274.137 | 106.95  |                                                                  |  |               |       |   |                 |                                                                  |       |           |       |       |             |       |   |           |       |   |              |                                                                                                                                                                                                                                                                                                                                                                                          |  |  |  |  |              |       |  |               |       |   |           |       |         |           |         |        |           |       |         |           |         |         |           |                                                                                                                                                                                                                                                                                                                                                                                          |         |         |         |         |  |       |         |               |         |         |           |        |   |           |         |         |           |         |   |           |         |         |           |         |   |         |         |         |  |         |   |         |         |         |       |         |         |   |         |         |  |         |         |   |         |         |  |        |         |   |         |         |  |         |         |   |         |         |       |         |         |         |   |         |  |         |         |         |   |         |  |         |         |         |   |         |  |         |        |         |   |         |       |         |        |         |         |   |  |         |         |         |         |   |  |         |         |         |         |   |  |         |         |         |         |   |                                                                                                                                                                                                                                                                                                                                                                                                                                                                                                                                                                                                                                                                                                                                                                                                                                                                                                                                                                                                                                                                                                                                                                                                                                                                                                                                                                                                                                                                                                                                                                                                                                                                                                                                                                                                                                                                                                                                                                                                                                                                                                                                                                                                                                                                                                                                                                                                     |  |  |  |  |  |           |  |  |  |  |                 |       |       |       |       |       |             |  |  |  |  |  |              |  |  |  |  |  |              |  |  |  |  |  |       |   |         |         |         |         |  |   |         |         |        |         |  |   |         |         |         |         |  |   |        |         |         |         |       |         |   |         |         |         |  |         |   |        |         |         |  |         |   |         |         |         |  |         |   |         |         |         |       |         |         |   |         |         |  |         |        |   |         |         |  |         |        |   |         |         |  |         |         |   |         |         |       |         |         |         |   |         |  |        |         |         |   |        |  |         |        |        |   |         |  |         |         |         |   |         |       |         |         |         |         |   |  |         |         |         |        |   |  |         |         |         |         |   |  |         |         |         |         |   |                                                                                                                                                                                                                                                                                                                                                                                                                                                                                                                                                                                                                                                                                                                                                                                                                                                                                                                                                                                                                                                                                                                                                                                                                                                                                                                                                                                                                                                                                                                                                                                                                                                                                                                                                                                                                                                                                                                                                                                                                                                                                                                                                                                                                                                                                                                                                                                                           |  |  |  |  |  |           |  |  |  |  |                 |       |       |       |       |       |             |  |  |  |  |  |              |  |  |  |  |  |              |  |  |  |  |  |       |   |         |         |         |         |  |   |         |         |         |         |  |   |         |         |         |         |  |   |         |         |         |         |       |         |   |         |         |         |  |         |   |         |         |         |  |         |   |         |         |         |  |         |   |         |         |         |       |         |         |   |         |        |  |         |         |   |         |         |  |         |         |   |         |         |  |         |         |   |        |         |       |         |         |         |   |         |  |         |         |         |   |         |  |         |        |         |   |         |  |         |         |         |   |         |       |         |         |         |         |   |  |         |         |         |         |   |  |         |         |         |         |   |  |         |         |         |        |   |
|                                                                                                                                                                                                                                                                                                                                                                                                                                                                                                                                                                                                                                                                                                                                                                                                                                                                                                                                                                                                                                                                                                                                                                                                                                                                                                                                                                                                                                                                                                                                                                                                                                                                                                                                                                                                                                                                                                                                                                                                                                                                                                                                                                                                                                                                                                                                                                                                          | 0       | 33.9975       | 33.9975 | 33.9975 | 35.5092 |                                                                  |  |               |       |   |                 |                                                                  |       |           |       |       |             |       |   |           |       |   |              |                                                                                                                                                                                                                                                                                                                                                                                          |  |  |  |  |              |       |  |               |       |   |           |       |         |           |         |        |           |       |         |           |         |         |           |                                                                                                                                                                                                                                                                                                                                                                                          |         |         |         |         |  |       |         |               |         |         |           |        |   |           |         |         |           |         |   |           |         |         |           |         |   |         |         |         |  |         |   |         |         |         |       |         |         |   |         |         |  |         |         |   |         |         |  |        |         |   |         |         |  |         |         |   |         |         |       |         |         |         |   |         |  |         |         |         |   |         |  |         |         |         |   |         |  |         |        |         |   |         |       |         |        |         |         |   |  |         |         |         |         |   |  |         |         |         |         |   |  |         |         |         |         |   |                                                                                                                                                                                                                                                                                                                                                                                                                                                                                                                                                                                                                                                                                                                                                                                                                                                                                                                                                                                                                                                                                                                                                                                                                                                                                                                                                                                                                                                                                                                                                                                                                                                                                                                                                                                                                                                                                                                                                                                                                                                                                                                                                                                                                                                                                                                                                                                                     |  |  |  |  |  |           |  |  |  |  |                 |       |       |       |       |       |             |  |  |  |  |  |              |  |  |  |  |  |              |  |  |  |  |  |       |   |         |         |         |         |  |   |         |         |        |         |  |   |         |         |         |         |  |   |        |         |         |         |       |         |   |         |         |         |  |         |   |        |         |         |  |         |   |         |         |         |  |         |   |         |         |         |       |         |         |   |         |         |  |         |        |   |         |         |  |         |        |   |         |         |  |         |         |   |         |         |       |         |         |         |   |         |  |        |         |         |   |        |  |         |        |        |   |         |  |         |         |         |   |         |       |         |         |         |         |   |  |         |         |         |        |   |  |         |         |         |         |   |  |         |         |         |         |   |                                                                                                                                                                                                                                                                                                                                                                                                                                                                                                                                                                                                                                                                                                                                                                                                                                                                                                                                                                                                                                                                                                                                                                                                                                                                                                                                                                                                                                                                                                                                                                                                                                                                                                                                                                                                                                                                                                                                                                                                                                                                                                                                                                                                                                                                                                                                                                                                           |  |  |  |  |  |           |  |  |  |  |                 |       |       |       |       |       |             |  |  |  |  |  |              |  |  |  |  |  |              |  |  |  |  |  |       |   |         |         |         |         |  |   |         |         |         |         |  |   |         |         |         |         |  |   |         |         |         |         |       |         |   |         |         |         |  |         |   |         |         |         |  |         |   |         |         |         |  |         |   |         |         |         |       |         |         |   |         |        |  |         |         |   |         |         |  |         |         |   |         |         |  |         |         |   |        |         |       |         |         |         |   |         |  |         |         |         |   |         |  |         |        |         |   |         |  |         |         |         |   |         |       |         |         |         |         |   |  |         |         |         |         |   |  |         |         |         |         |   |  |         |         |         |        |   |
|                                                                                                                                                                                                                                                                                                                                                                                                                                                                                                                                                                                                                                                                                                                                                                                                                                                                                                                                                                                                                                                                                                                                                                                                                                                                                                                                                                                                                                                                                                                                                                                                                                                                                                                                                                                                                                                                                                                                                                                                                                                                                                                                                                                                                                                                                                                                                                                                          | 0       | -27.377       | -241.69 | 173.639 | 1.98384 |                                                                  |  |               |       |   |                 |                                                                  |       |           |       |       |             |       |   |           |       |   |              |                                                                                                                                                                                                                                                                                                                                                                                          |  |  |  |  |              |       |  |               |       |   |           |       |         |           |         |        |           |       |         |           |         |         |           |                                                                                                                                                                                                                                                                                                                                                                                          |         |         |         |         |  |       |         |               |         |         |           |        |   |           |         |         |           |         |   |           |         |         |           |         |   |         |         |         |  |         |   |         |         |         |       |         |         |   |         |         |  |         |         |   |         |         |  |        |         |   |         |         |  |         |         |   |         |         |       |         |         |         |   |         |  |         |         |         |   |         |  |         |         |         |   |         |  |         |        |         |   |         |       |         |        |         |         |   |  |         |         |         |         |   |  |         |         |         |         |   |  |         |         |         |         |   |                                                                                                                                                                                                                                                                                                                                                                                                                                                                                                                                                                                                                                                                                                                                                                                                                                                                                                                                                                                                                                                                                                                                                                                                                                                                                                                                                                                                                                                                                                                                                                                                                                                                                                                                                                                                                                                                                                                                                                                                                                                                                                                                                                                                                                                                                                                                                                                                     |  |  |  |  |  |           |  |  |  |  |                 |       |       |       |       |       |             |  |  |  |  |  |              |  |  |  |  |  |              |  |  |  |  |  |       |   |         |         |         |         |  |   |         |         |        |         |  |   |         |         |         |         |  |   |        |         |         |         |       |         |   |         |         |         |  |         |   |        |         |         |  |         |   |         |         |         |  |         |   |         |         |         |       |         |         |   |         |         |  |         |        |   |         |         |  |         |        |   |         |         |  |         |         |   |         |         |       |         |         |         |   |         |  |        |         |         |   |        |  |         |        |        |   |         |  |         |         |         |   |         |       |         |         |         |         |   |  |         |         |         |        |   |  |         |         |         |         |   |  |         |         |         |         |   |                                                                                                                                                                                                                                                                                                                                                                                                                                                                                                                                                                                                                                                                                                                                                                                                                                                                                                                                                                                                                                                                                                                                                                                                                                                                                                                                                                                                                                                                                                                                                                                                                                                                                                                                                                                                                                                                                                                                                                                                                                                                                                                                                                                                                                                                                                                                                                                                           |  |  |  |  |  |           |  |  |  |  |                 |       |       |       |       |       |             |  |  |  |  |  |              |  |  |  |  |  |              |  |  |  |  |  |       |   |         |         |         |         |  |   |         |         |         |         |  |   |         |         |         |         |  |   |         |         |         |         |       |         |   |         |         |         |  |         |   |         |         |         |  |         |   |         |         |         |  |         |   |         |         |         |       |         |         |   |         |        |  |         |         |   |         |         |  |         |         |   |         |         |  |         |         |   |        |         |       |         |         |         |   |         |  |         |         |         |   |         |  |         |        |         |   |         |  |         |         |         |   |         |       |         |         |         |         |   |  |         |         |         |         |   |  |         |         |         |         |   |  |         |         |         |        |   |
|                                                                                                                                                                                                                                                                                                                                                                                                                                                                                                                                                                                                                                                                                                                                                                                                                                                                                                                                                                                                                                                                                                                                                                                                                                                                                                                                                                                                                                                                                                                                                                                                                                                                                                                                                                                                                                                                                                                                                                                                                                                                                                                                                                                                                                                                                                                                                                                                          | 0       | 173.618       | -40.697 | 374.634 | 211.916 |                                                                  |  |               |       |   |                 |                                                                  |       |           |       |       |             |       |   |           |       |   |              |                                                                                                                                                                                                                                                                                                                                                                                          |  |  |  |  |              |       |  |               |       |   |           |       |         |           |         |        |           |       |         |           |         |         |           |                                                                                                                                                                                                                                                                                                                                                                                          |         |         |         |         |  |       |         |               |         |         |           |        |   |           |         |         |           |         |   |           |         |         |           |         |   |         |         |         |  |         |   |         |         |         |       |         |         |   |         |         |  |         |         |   |         |         |  |        |         |   |         |         |  |         |         |   |         |         |       |         |         |         |   |         |  |         |         |         |   |         |  |         |         |         |   |         |  |         |        |         |   |         |       |         |        |         |         |   |  |         |         |         |         |   |  |         |         |         |         |   |  |         |         |         |         |   |                                                                                                                                                                                                                                                                                                                                                                                                                                                                                                                                                                                                                                                                                                                                                                                                                                                                                                                                                                                                                                                                                                                                                                                                                                                                                                                                                                                                                                                                                                                                                                                                                                                                                                                                                                                                                                                                                                                                                                                                                                                                                                                                                                                                                                                                                                                                                                                                     |  |  |  |  |  |           |  |  |  |  |                 |       |       |       |       |       |             |  |  |  |  |  |              |  |  |  |  |  |              |  |  |  |  |  |       |   |         |         |         |         |  |   |         |         |        |         |  |   |         |         |         |         |  |   |        |         |         |         |       |         |   |         |         |         |  |         |   |        |         |         |  |         |   |         |         |         |  |         |   |         |         |         |       |         |         |   |         |         |  |         |        |   |         |         |  |         |        |   |         |         |  |         |         |   |         |         |       |         |         |         |   |         |  |        |         |         |   |        |  |         |        |        |   |         |  |         |         |         |   |         |       |         |         |         |         |   |  |         |         |         |        |   |  |         |         |         |         |   |  |         |         |         |         |   |                                                                                                                                                                                                                                                                                                                                                                                                                                                                                                                                                                                                                                                                                                                                                                                                                                                                                                                                                                                                                                                                                                                                                                                                                                                                                                                                                                                                                                                                                                                                                                                                                                                                                                                                                                                                                                                                                                                                                                                                                                                                                                                                                                                                                                                                                                                                                                                                           |  |  |  |  |  |           |  |  |  |  |                 |       |       |       |       |       |             |  |  |  |  |  |              |  |  |  |  |  |              |  |  |  |  |  |       |   |         |         |         |         |  |   |         |         |         |         |  |   |         |         |         |         |  |   |         |         |         |         |       |         |   |         |         |         |  |         |   |         |         |         |  |         |   |         |         |         |  |         |   |         |         |         |       |         |         |   |         |        |  |         |         |   |         |         |  |         |         |   |         |         |  |         |         |   |        |         |       |         |         |         |   |         |  |         |         |         |   |         |  |         |        |         |   |         |  |         |         |         |   |         |       |         |         |         |         |   |  |         |         |         |         |   |  |         |         |         |         |   |  |         |         |         |        |   |
| Dc Aq                                                                                                                                                                                                                                                                                                                                                                                                                                                                                                                                                                                                                                                                                                                                                                                                                                                                                                                                                                                                                                                                                                                                                                                                                                                                                                                                                                                                                                                                                                                                                                                                                                                                                                                                                                                                                                                                                                                                                                                                                                                                                                                                                                                                                                                                                                                                                                                                    | -73.12  | 0             | -214.32 | 201.016 | 33.8296 |                                                                  |  |               |       |   |                 |                                                                  |       |           |       |       |             |       |   |           |       |   |              |                                                                                                                                                                                                                                                                                                                                                                                          |  |  |  |  |              |       |  |               |       |   |           |       |         |           |         |        |           |       |         |           |         |         |           |                                                                                                                                                                                                                                                                                                                                                                                          |         |         |         |         |  |       |         |               |         |         |           |        |   |           |         |         |           |         |   |           |         |         |           |         |   |         |         |         |  |         |   |         |         |         |       |         |         |   |         |         |  |         |         |   |         |         |  |        |         |   |         |         |  |         |         |   |         |         |       |         |         |         |   |         |  |         |         |         |   |         |  |         |         |         |   |         |  |         |        |         |   |         |       |         |        |         |         |   |  |         |         |         |         |   |  |         |         |         |         |   |  |         |         |         |         |   |                                                                                                                                                                                                                                                                                                                                                                                                                                                                                                                                                                                                                                                                                                                                                                                                                                                                                                                                                                                                                                                                                                                                                                                                                                                                                                                                                                                                                                                                                                                                                                                                                                                                                                                                                                                                                                                                                                                                                                                                                                                                                                                                                                                                                                                                                                                                                                                                     |  |  |  |  |  |           |  |  |  |  |                 |       |       |       |       |       |             |  |  |  |  |  |              |  |  |  |  |  |              |  |  |  |  |  |       |   |         |         |         |         |  |   |         |         |        |         |  |   |         |         |         |         |  |   |        |         |         |         |       |         |   |         |         |         |  |         |   |        |         |         |  |         |   |         |         |         |  |         |   |         |         |         |       |         |         |   |         |         |  |         |        |   |         |         |  |         |        |   |         |         |  |         |         |   |         |         |       |         |         |         |   |         |  |        |         |         |   |        |  |         |        |        |   |         |  |         |         |         |   |         |       |         |         |         |         |   |  |         |         |         |        |   |  |         |         |         |         |   |  |         |         |         |         |   |                                                                                                                                                                                                                                                                                                                                                                                                                                                                                                                                                                                                                                                                                                                                                                                                                                                                                                                                                                                                                                                                                                                                                                                                                                                                                                                                                                                                                                                                                                                                                                                                                                                                                                                                                                                                                                                                                                                                                                                                                                                                                                                                                                                                                                                                                                                                                                                                           |  |  |  |  |  |           |  |  |  |  |                 |       |       |       |       |       |             |  |  |  |  |  |              |  |  |  |  |  |              |  |  |  |  |  |       |   |         |         |         |         |  |   |         |         |         |         |  |   |         |         |         |         |  |   |         |         |         |         |       |         |   |         |         |         |  |         |   |         |         |         |  |         |   |         |         |         |  |         |   |         |         |         |       |         |         |   |         |        |  |         |         |   |         |         |  |         |         |   |         |         |  |         |         |   |        |         |       |         |         |         |   |         |  |         |         |         |   |         |  |         |        |         |   |         |  |         |         |         |   |         |       |         |         |         |         |   |  |         |         |         |         |   |  |         |         |         |         |   |  |         |         |         |        |   |
|                                                                                                                                                                                                                                                                                                                                                                                                                                                                                                                                                                                                                                                                                                                                                                                                                                                                                                                                                                                                                                                                                                                                                                                                                                                                                                                                                                                                                                                                                                                                                                                                                                                                                                                                                                                                                                                                                                                                                                                                                                                                                                                                                                                                                                                                                                                                                                                                          | 33.9975 | 0             | 32.4154 | 32.4154 | 33.9975 |                                                                  |  |               |       |   |                 |                                                                  |       |           |       |       |             |       |   |           |       |   |              |                                                                                                                                                                                                                                                                                                                                                                                          |  |  |  |  |              |       |  |               |       |   |           |       |         |           |         |        |           |       |         |           |         |         |           |                                                                                                                                                                                                                                                                                                                                                                                          |         |         |         |         |  |       |         |               |         |         |           |        |   |           |         |         |           |         |   |           |         |         |           |         |   |         |         |         |  |         |   |         |         |         |       |         |         |   |         |         |  |         |         |   |         |         |  |        |         |   |         |         |  |         |         |   |         |         |       |         |         |         |   |         |  |         |         |         |   |         |  |         |         |         |   |         |  |         |        |         |   |         |       |         |        |         |         |   |  |         |         |         |         |   |  |         |         |         |         |   |  |         |         |         |         |   |                                                                                                                                                                                                                                                                                                                                                                                                                                                                                                                                                                                                                                                                                                                                                                                                                                                                                                                                                                                                                                                                                                                                                                                                                                                                                                                                                                                                                                                                                                                                                                                                                                                                                                                                                                                                                                                                                                                                                                                                                                                                                                                                                                                                                                                                                                                                                                                                     |  |  |  |  |  |           |  |  |  |  |                 |       |       |       |       |       |             |  |  |  |  |  |              |  |  |  |  |  |              |  |  |  |  |  |       |   |         |         |         |         |  |   |         |         |        |         |  |   |         |         |         |         |  |   |        |         |         |         |       |         |   |         |         |         |  |         |   |        |         |         |  |         |   |         |         |         |  |         |   |         |         |         |       |         |         |   |         |         |  |         |        |   |         |         |  |         |        |   |         |         |  |         |         |   |         |         |       |         |         |         |   |         |  |        |         |         |   |        |  |         |        |        |   |         |  |         |         |         |   |         |       |         |         |         |         |   |  |         |         |         |        |   |  |         |         |         |         |   |  |         |         |         |         |   |                                                                                                                                                                                                                                                                                                                                                                                                                                                                                                                                                                                                                                                                                                                                                                                                                                                                                                                                                                                                                                                                                                                                                                                                                                                                                                                                                                                                                                                                                                                                                                                                                                                                                                                                                                                                                                                                                                                                                                                                                                                                                                                                                                                                                                                                                                                                                                                                           |  |  |  |  |  |           |  |  |  |  |                 |       |       |       |       |       |             |  |  |  |  |  |              |  |  |  |  |  |              |  |  |  |  |  |       |   |         |         |         |         |  |   |         |         |         |         |  |   |         |         |         |         |  |   |         |         |         |         |       |         |   |         |         |         |  |         |   |         |         |         |  |         |   |         |         |         |  |         |   |         |         |         |       |         |         |   |         |        |  |         |         |   |         |         |  |         |         |   |         |         |  |         |         |   |        |         |       |         |         |         |   |         |  |         |         |         |   |         |  |         |        |         |   |         |  |         |         |         |   |         |       |         |         |         |         |   |  |         |         |         |         |   |  |         |         |         |         |   |  |         |         |         |        |   |
|                                                                                                                                                                                                                                                                                                                                                                                                                                                                                                                                                                                                                                                                                                                                                                                                                                                                                                                                                                                                                                                                                                                                                                                                                                                                                                                                                                                                                                                                                                                                                                                                                                                                                                                                                                                                                                                                                                                                                                                                                                                                                                                                                                                                                                                                                                                                                                                                          | -173.62 | 0             | -310.14 | 105.196 | -66.668 |                                                                  |  |               |       |   |                 |                                                                  |       |           |       |       |             |       |   |           |       |   |              |                                                                                                                                                                                                                                                                                                                                                                                          |  |  |  |  |              |       |  |               |       |   |           |       |         |           |         |        |           |       |         |           |         |         |           |                                                                                                                                                                                                                                                                                                                                                                                          |         |         |         |         |  |       |         |               |         |         |           |        |   |           |         |         |           |         |   |           |         |         |           |         |   |         |         |         |  |         |   |         |         |         |       |         |         |   |         |         |  |         |         |   |         |         |  |        |         |   |         |         |  |         |         |   |         |         |       |         |         |         |   |         |  |         |         |         |   |         |  |         |         |         |   |         |  |         |        |         |   |         |       |         |        |         |         |   |  |         |         |         |         |   |  |         |         |         |         |   |  |         |         |         |         |   |                                                                                                                                                                                                                                                                                                                                                                                                                                                                                                                                                                                                                                                                                                                                                                                                                                                                                                                                                                                                                                                                                                                                                                                                                                                                                                                                                                                                                                                                                                                                                                                                                                                                                                                                                                                                                                                                                                                                                                                                                                                                                                                                                                                                                                                                                                                                                                                                     |  |  |  |  |  |           |  |  |  |  |                 |       |       |       |       |       |             |  |  |  |  |  |              |  |  |  |  |  |              |  |  |  |  |  |       |   |         |         |         |         |  |   |         |         |        |         |  |   |         |         |         |         |  |   |        |         |         |         |       |         |   |         |         |         |  |         |   |        |         |         |  |         |   |         |         |         |  |         |   |         |         |         |       |         |         |   |         |         |  |         |        |   |         |         |  |         |        |   |         |         |  |         |         |   |         |         |       |         |         |         |   |         |  |        |         |         |   |        |  |         |        |        |   |         |  |         |         |         |   |         |       |         |         |         |         |   |  |         |         |         |        |   |  |         |         |         |         |   |  |         |         |         |         |   |                                                                                                                                                                                                                                                                                                                                                                                                                                                                                                                                                                                                                                                                                                                                                                                                                                                                                                                                                                                                                                                                                                                                                                                                                                                                                                                                                                                                                                                                                                                                                                                                                                                                                                                                                                                                                                                                                                                                                                                                                                                                                                                                                                                                                                                                                                                                                                                                           |  |  |  |  |  |           |  |  |  |  |                 |       |       |       |       |       |             |  |  |  |  |  |              |  |  |  |  |  |              |  |  |  |  |  |       |   |         |         |         |         |  |   |         |         |         |         |  |   |         |         |         |         |  |   |         |         |         |         |       |         |   |         |         |         |  |         |   |         |         |         |  |         |   |         |         |         |  |         |   |         |         |         |       |         |         |   |         |        |  |         |         |   |         |         |  |         |         |   |         |         |  |         |         |   |        |         |       |         |         |         |   |         |  |         |         |         |   |         |  |         |        |         |   |         |  |         |         |         |   |         |       |         |         |         |         |   |  |         |         |         |         |   |  |         |         |         |         |   |  |         |         |         |        |   |
|                                                                                                                                                                                                                                                                                                                                                                                                                                                                                                                                                                                                                                                                                                                                                                                                                                                                                                                                                                                                                                                                                                                                                                                                                                                                                                                                                                                                                                                                                                                                                                                                                                                                                                                                                                                                                                                                                                                                                                                                                                                                                                                                                                                                                                                                                                                                                                                                          | 27.3771 | 0             | -118.49 | 296.837 | 134.327 |                                                                  |  |               |       |   |                 |                                                                  |       |           |       |       |             |       |   |           |       |   |              |                                                                                                                                                                                                                                                                                                                                                                                          |  |  |  |  |              |       |  |               |       |   |           |       |         |           |         |        |           |       |         |           |         |         |           |                                                                                                                                                                                                                                                                                                                                                                                          |         |         |         |         |  |       |         |               |         |         |           |        |   |           |         |         |           |         |   |           |         |         |           |         |   |         |         |         |  |         |   |         |         |         |       |         |         |   |         |         |  |         |         |   |         |         |  |        |         |   |         |         |  |         |         |   |         |         |       |         |         |         |   |         |  |         |         |         |   |         |  |         |         |         |   |         |  |         |        |         |   |         |       |         |        |         |         |   |  |         |         |         |         |   |  |         |         |         |         |   |  |         |         |         |         |   |                                                                                                                                                                                                                                                                                                                                                                                                                                                                                                                                                                                                                                                                                                                                                                                                                                                                                                                                                                                                                                                                                                                                                                                                                                                                                                                                                                                                                                                                                                                                                                                                                                                                                                                                                                                                                                                                                                                                                                                                                                                                                                                                                                                                                                                                                                                                                                                                     |  |  |  |  |  |           |  |  |  |  |                 |       |       |       |       |       |             |  |  |  |  |  |              |  |  |  |  |  |              |  |  |  |  |  |       |   |         |         |         |         |  |   |         |         |        |         |  |   |         |         |         |         |  |   |        |         |         |         |       |         |   |         |         |         |  |         |   |        |         |         |  |         |   |         |         |         |  |         |   |         |         |         |       |         |         |   |         |         |  |         |        |   |         |         |  |         |        |   |         |         |  |         |         |   |         |         |       |         |         |         |   |         |  |        |         |         |   |        |  |         |        |        |   |         |  |         |         |         |   |         |       |         |         |         |         |   |  |         |         |         |        |   |  |         |         |         |         |   |  |         |         |         |         |   |                                                                                                                                                                                                                                                                                                                                                                                                                                                                                                                                                                                                                                                                                                                                                                                                                                                                                                                                                                                                                                                                                                                                                                                                                                                                                                                                                                                                                                                                                                                                                                                                                                                                                                                                                                                                                                                                                                                                                                                                                                                                                                                                                                                                                                                                                                                                                                                                           |  |  |  |  |  |           |  |  |  |  |                 |       |       |       |       |       |             |  |  |  |  |  |              |  |  |  |  |  |              |  |  |  |  |  |       |   |         |         |         |         |  |   |         |         |         |         |  |   |         |         |         |         |  |   |         |         |         |         |       |         |   |         |         |         |  |         |   |         |         |         |  |         |   |         |         |         |  |         |   |         |         |         |       |         |         |   |         |        |  |         |         |   |         |         |  |         |         |   |         |         |  |         |         |   |        |         |       |         |         |         |   |         |  |         |         |         |   |         |  |         |        |         |   |         |  |         |         |         |   |         |       |         |         |         |         |   |  |         |         |         |         |   |  |         |         |         |         |   |  |         |         |         |        |   |
| Dc FI                                                                                                                                                                                                                                                                                                                                                                                                                                                                                                                                                                                                                                                                                                                                                                                                                                                                                                                                                                                                                                                                                                                                                                                                                                                                                                                                                                                                                                                                                                                                                                                                                                                                                                                                                                                                                                                                                                                                                                                                                                                                                                                                                                                                                                                                                                                                                                                                    | 141.195 | 214.315       | 0       | 415.331 | 248.145 |                                                                  |  |               |       |   |                 |                                                                  |       |           |       |       |             |       |   |           |       |   |              |                                                                                                                                                                                                                                                                                                                                                                                          |  |  |  |  |              |       |  |               |       |   |           |       |         |           |         |        |           |       |         |           |         |         |           |                                                                                                                                                                                                                                                                                                                                                                                          |         |         |         |         |  |       |         |               |         |         |           |        |   |           |         |         |           |         |   |           |         |         |           |         |   |         |         |         |  |         |   |         |         |         |       |         |         |   |         |         |  |         |         |   |         |         |  |        |         |   |         |         |  |         |         |   |         |         |       |         |         |         |   |         |  |         |         |         |   |         |  |         |         |         |   |         |  |         |        |         |   |         |       |         |        |         |         |   |  |         |         |         |         |   |  |         |         |         |         |   |  |         |         |         |         |   |                                                                                                                                                                                                                                                                                                                                                                                                                                                                                                                                                                                                                                                                                                                                                                                                                                                                                                                                                                                                                                                                                                                                                                                                                                                                                                                                                                                                                                                                                                                                                                                                                                                                                                                                                                                                                                                                                                                                                                                                                                                                                                                                                                                                                                                                                                                                                                                                     |  |  |  |  |  |           |  |  |  |  |                 |       |       |       |       |       |             |  |  |  |  |  |              |  |  |  |  |  |              |  |  |  |  |  |       |   |         |         |         |         |  |   |         |         |        |         |  |   |         |         |         |         |  |   |        |         |         |         |       |         |   |         |         |         |  |         |   |        |         |         |  |         |   |         |         |         |  |         |   |         |         |         |       |         |         |   |         |         |  |         |        |   |         |         |  |         |        |   |         |         |  |         |         |   |         |         |       |         |         |         |   |         |  |        |         |         |   |        |  |         |        |        |   |         |  |         |         |         |   |         |       |         |         |         |         |   |  |         |         |         |        |   |  |         |         |         |         |   |  |         |         |         |         |   |                                                                                                                                                                                                                                                                                                                                                                                                                                                                                                                                                                                                                                                                                                                                                                                                                                                                                                                                                                                                                                                                                                                                                                                                                                                                                                                                                                                                                                                                                                                                                                                                                                                                                                                                                                                                                                                                                                                                                                                                                                                                                                                                                                                                                                                                                                                                                                                                           |  |  |  |  |  |           |  |  |  |  |                 |       |       |       |       |       |             |  |  |  |  |  |              |  |  |  |  |  |              |  |  |  |  |  |       |   |         |         |         |         |  |   |         |         |         |         |  |   |         |         |         |         |  |   |         |         |         |         |       |         |   |         |         |         |  |         |   |         |         |         |  |         |   |         |         |         |  |         |   |         |         |         |       |         |         |   |         |        |  |         |         |   |         |         |  |         |         |   |         |         |  |         |         |   |        |         |       |         |         |         |   |         |  |         |         |         |   |         |  |         |        |         |   |         |  |         |         |         |   |         |       |         |         |         |         |   |  |         |         |         |         |   |  |         |         |         |         |   |  |         |         |         |        |   |
|                                                                                                                                                                                                                                                                                                                                                                                                                                                                                                                                                                                                                                                                                                                                                                                                                                                                                                                                                                                                                                                                                                                                                                                                                                                                                                                                                                                                                                                                                                                                                                                                                                                                                                                                                                                                                                                                                                                                                                                                                                                                                                                                                                                                                                                                                                                                                                                                          | 33.9975 | 32.4154       | 0       | 32.4154 | 33.9975 |                                                                  |  |               |       |   |                 |                                                                  |       |           |       |       |             |       |   |           |       |   |              |                                                                                                                                                                                                                                                                                                                                                                                          |  |  |  |  |              |       |  |               |       |   |           |       |         |           |         |        |           |       |         |           |         |         |           |                                                                                                                                                                                                                                                                                                                                                                                          |         |         |         |         |  |       |         |               |         |         |           |        |   |           |         |         |           |         |   |           |         |         |           |         |   |         |         |         |  |         |   |         |         |         |       |         |         |   |         |         |  |         |         |   |         |         |  |        |         |   |         |         |  |         |         |   |         |         |       |         |         |         |   |         |  |         |         |         |   |         |  |         |         |         |   |         |  |         |        |         |   |         |       |         |        |         |         |   |  |         |         |         |         |   |  |         |         |         |         |   |  |         |         |         |         |   |                                                                                                                                                                                                                                                                                                                                                                                                                                                                                                                                                                                                                                                                                                                                                                                                                                                                                                                                                                                                                                                                                                                                                                                                                                                                                                                                                                                                                                                                                                                                                                                                                                                                                                                                                                                                                                                                                                                                                                                                                                                                                                                                                                                                                                                                                                                                                                                                     |  |  |  |  |  |           |  |  |  |  |                 |       |       |       |       |       |             |  |  |  |  |  |              |  |  |  |  |  |              |  |  |  |  |  |       |   |         |         |         |         |  |   |         |         |        |         |  |   |         |         |         |         |  |   |        |         |         |         |       |         |   |         |         |         |  |         |   |        |         |         |  |         |   |         |         |         |  |         |   |         |         |         |       |         |         |   |         |         |  |         |        |   |         |         |  |         |        |   |         |         |  |         |         |   |         |         |       |         |         |         |   |         |  |        |         |         |   |        |  |         |        |        |   |         |  |         |         |         |   |         |       |         |         |         |         |   |  |         |         |         |        |   |  |         |         |         |         |   |  |         |         |         |         |   |                                                                                                                                                                                                                                                                                                                                                                                                                                                                                                                                                                                                                                                                                                                                                                                                                                                                                                                                                                                                                                                                                                                                                                                                                                                                                                                                                                                                                                                                                                                                                                                                                                                                                                                                                                                                                                                                                                                                                                                                                                                                                                                                                                                                                                                                                                                                                                                                           |  |  |  |  |  |           |  |  |  |  |                 |       |       |       |       |       |             |  |  |  |  |  |              |  |  |  |  |  |              |  |  |  |  |  |       |   |         |         |         |         |  |   |         |         |         |         |  |   |         |         |         |         |  |   |         |         |         |         |       |         |   |         |         |         |  |         |   |         |         |         |  |         |   |         |         |         |  |         |   |         |         |         |       |         |         |   |         |        |  |         |         |   |         |         |  |         |         |   |         |         |  |         |         |   |        |         |       |         |         |         |   |         |  |         |         |         |   |         |  |         |        |         |   |         |  |         |         |         |   |         |       |         |         |         |         |   |  |         |         |         |         |   |  |         |         |         |         |   |  |         |         |         |        |   |
|                                                                                                                                                                                                                                                                                                                                                                                                                                                                                                                                                                                                                                                                                                                                                                                                                                                                                                                                                                                                                                                                                                                                                                                                                                                                                                                                                                                                                                                                                                                                                                                                                                                                                                                                                                                                                                                                                                                                                                                                                                                                                                                                                                                                                                                                                                                                                                                                          | 40.697  | 118.494       | 0       | 319.511 | 147.647 |                                                                  |  |               |       |   |                 |                                                                  |       |           |       |       |             |       |   |           |       |   |              |                                                                                                                                                                                                                                                                                                                                                                                          |  |  |  |  |              |       |  |               |       |   |           |       |         |           |         |        |           |       |         |           |         |         |           |                                                                                                                                                                                                                                                                                                                                                                                          |         |         |         |         |  |       |         |               |         |         |           |        |   |           |         |         |           |         |   |           |         |         |           |         |   |         |         |         |  |         |   |         |         |         |       |         |         |   |         |         |  |         |         |   |         |         |  |        |         |   |         |         |  |         |         |   |         |         |       |         |         |         |   |         |  |         |         |         |   |         |  |         |         |         |   |         |  |         |        |         |   |         |       |         |        |         |         |   |  |         |         |         |         |   |  |         |         |         |         |   |  |         |         |         |         |   |                                                                                                                                                                                                                                                                                                                                                                                                                                                                                                                                                                                                                                                                                                                                                                                                                                                                                                                                                                                                                                                                                                                                                                                                                                                                                                                                                                                                                                                                                                                                                                                                                                                                                                                                                                                                                                                                                                                                                                                                                                                                                                                                                                                                                                                                                                                                                                                                     |  |  |  |  |  |           |  |  |  |  |                 |       |       |       |       |       |             |  |  |  |  |  |              |  |  |  |  |  |              |  |  |  |  |  |       |   |         |         |         |         |  |   |         |         |        |         |  |   |         |         |         |         |  |   |        |         |         |         |       |         |   |         |         |         |  |         |   |        |         |         |  |         |   |         |         |         |  |         |   |         |         |         |       |         |         |   |         |         |  |         |        |   |         |         |  |         |        |   |         |         |  |         |         |   |         |         |       |         |         |         |   |         |  |        |         |         |   |        |  |         |        |        |   |         |  |         |         |         |   |         |       |         |         |         |         |   |  |         |         |         |        |   |  |         |         |         |         |   |  |         |         |         |         |   |                                                                                                                                                                                                                                                                                                                                                                                                                                                                                                                                                                                                                                                                                                                                                                                                                                                                                                                                                                                                                                                                                                                                                                                                                                                                                                                                                                                                                                                                                                                                                                                                                                                                                                                                                                                                                                                                                                                                                                                                                                                                                                                                                                                                                                                                                                                                                                                                           |  |  |  |  |  |           |  |  |  |  |                 |       |       |       |       |       |             |  |  |  |  |  |              |  |  |  |  |  |              |  |  |  |  |  |       |   |         |         |         |         |  |   |         |         |         |         |  |   |         |         |         |         |  |   |         |         |         |         |       |         |   |         |         |         |  |         |   |         |         |         |  |         |   |         |         |         |  |         |   |         |         |         |       |         |         |   |         |        |  |         |         |   |         |         |  |         |         |   |         |         |  |         |         |   |        |         |       |         |         |         |   |         |  |         |         |         |   |         |  |         |        |         |   |         |  |         |         |         |   |         |       |         |         |         |         |   |  |         |         |         |         |   |  |         |         |         |         |   |  |         |         |         |        |   |
|                                                                                                                                                                                                                                                                                                                                                                                                                                                                                                                                                                                                                                                                                                                                                                                                                                                                                                                                                                                                                                                                                                                                                                                                                                                                                                                                                                                                                                                                                                                                                                                                                                                                                                                                                                                                                                                                                                                                                                                                                                                                                                                                                                                                                                                                                                                                                                                                          | 241.692 | 310.136       | 0       | 511.152 | 348.642 |                                                                  |  |               |       |   |                 |                                                                  |       |           |       |       |             |       |   |           |       |   |              |                                                                                                                                                                                                                                                                                                                                                                                          |  |  |  |  |              |       |  |               |       |   |           |       |         |           |         |        |           |       |         |           |         |         |           |                                                                                                                                                                                                                                                                                                                                                                                          |         |         |         |         |  |       |         |               |         |         |           |        |   |           |         |         |           |         |   |           |         |         |           |         |   |         |         |         |  |         |   |         |         |         |       |         |         |   |         |         |  |         |         |   |         |         |  |        |         |   |         |         |  |         |         |   |         |         |       |         |         |         |   |         |  |         |         |         |   |         |  |         |         |         |   |         |  |         |        |         |   |         |       |         |        |         |         |   |  |         |         |         |         |   |  |         |         |         |         |   |  |         |         |         |         |   |                                                                                                                                                                                                                                                                                                                                                                                                                                                                                                                                                                                                                                                                                                                                                                                                                                                                                                                                                                                                                                                                                                                                                                                                                                                                                                                                                                                                                                                                                                                                                                                                                                                                                                                                                                                                                                                                                                                                                                                                                                                                                                                                                                                                                                                                                                                                                                                                     |  |  |  |  |  |           |  |  |  |  |                 |       |       |       |       |       |             |  |  |  |  |  |              |  |  |  |  |  |              |  |  |  |  |  |       |   |         |         |         |         |  |   |         |         |        |         |  |   |         |         |         |         |  |   |        |         |         |         |       |         |   |         |         |         |  |         |   |        |         |         |  |         |   |         |         |         |  |         |   |         |         |         |       |         |         |   |         |         |  |         |        |   |         |         |  |         |        |   |         |         |  |         |         |   |         |         |       |         |         |         |   |         |  |        |         |         |   |        |  |         |        |        |   |         |  |         |         |         |   |         |       |         |         |         |         |   |  |         |         |         |        |   |  |         |         |         |         |   |  |         |         |         |         |   |                                                                                                                                                                                                                                                                                                                                                                                                                                                                                                                                                                                                                                                                                                                                                                                                                                                                                                                                                                                                                                                                                                                                                                                                                                                                                                                                                                                                                                                                                                                                                                                                                                                                                                                                                                                                                                                                                                                                                                                                                                                                                                                                                                                                                                                                                                                                                                                                           |  |  |  |  |  |           |  |  |  |  |                 |       |       |       |       |       |             |  |  |  |  |  |              |  |  |  |  |  |              |  |  |  |  |  |       |   |         |         |         |         |  |   |         |         |         |         |  |   |         |         |         |         |  |   |         |         |         |         |       |         |   |         |         |         |  |         |   |         |         |         |  |         |   |         |         |         |  |         |   |         |         |         |       |         |         |   |         |        |  |         |         |   |         |         |  |         |         |   |         |         |  |         |         |   |        |         |       |         |         |         |   |         |  |         |         |         |   |         |  |         |        |         |   |         |  |         |         |         |   |         |       |         |         |         |         |   |  |         |         |         |         |   |  |         |         |         |         |   |  |         |         |         |        |   |
| Sc Aq                                                                                                                                                                                                                                                                                                                                                                                                                                                                                                                                                                                                                                                                                                                                                                                                                                                                                                                                                                                                                                                                                                                                                                                                                                                                                                                                                                                                                                                                                                                                                                                                                                                                                                                                                                                                                                                                                                                                                                                                                                                                                                                                                                                                                                                                                                                                                                                                    | -274.14 | -201.02       | -415.33 | 0       | -167.19 |                                                                  |  |               |       |   |                 |                                                                  |       |           |       |       |             |       |   |           |       |   |              |                                                                                                                                                                                                                                                                                                                                                                                          |  |  |  |  |              |       |  |               |       |   |           |       |         |           |         |        |           |       |         |           |         |         |           |                                                                                                                                                                                                                                                                                                                                                                                          |         |         |         |         |  |       |         |               |         |         |           |        |   |           |         |         |           |         |   |           |         |         |           |         |   |         |         |         |  |         |   |         |         |         |       |         |         |   |         |         |  |         |         |   |         |         |  |        |         |   |         |         |  |         |         |   |         |         |       |         |         |         |   |         |  |         |         |         |   |         |  |         |         |         |   |         |  |         |        |         |   |         |       |         |        |         |         |   |  |         |         |         |         |   |  |         |         |         |         |   |  |         |         |         |         |   |                                                                                                                                                                                                                                                                                                                                                                                                                                                                                                                                                                                                                                                                                                                                                                                                                                                                                                                                                                                                                                                                                                                                                                                                                                                                                                                                                                                                                                                                                                                                                                                                                                                                                                                                                                                                                                                                                                                                                                                                                                                                                                                                                                                                                                                                                                                                                                                                     |  |  |  |  |  |           |  |  |  |  |                 |       |       |       |       |       |             |  |  |  |  |  |              |  |  |  |  |  |              |  |  |  |  |  |       |   |         |         |         |         |  |   |         |         |        |         |  |   |         |         |         |         |  |   |        |         |         |         |       |         |   |         |         |         |  |         |   |        |         |         |  |         |   |         |         |         |  |         |   |         |         |         |       |         |         |   |         |         |  |         |        |   |         |         |  |         |        |   |         |         |  |         |         |   |         |         |       |         |         |         |   |         |  |        |         |         |   |        |  |         |        |        |   |         |  |         |         |         |   |         |       |         |         |         |         |   |  |         |         |         |        |   |  |         |         |         |         |   |  |         |         |         |         |   |                                                                                                                                                                                                                                                                                                                                                                                                                                                                                                                                                                                                                                                                                                                                                                                                                                                                                                                                                                                                                                                                                                                                                                                                                                                                                                                                                                                                                                                                                                                                                                                                                                                                                                                                                                                                                                                                                                                                                                                                                                                                                                                                                                                                                                                                                                                                                                                                           |  |  |  |  |  |           |  |  |  |  |                 |       |       |       |       |       |             |  |  |  |  |  |              |  |  |  |  |  |              |  |  |  |  |  |       |   |         |         |         |         |  |   |         |         |         |         |  |   |         |         |         |         |  |   |         |         |         |         |       |         |   |         |         |         |  |         |   |         |         |         |  |         |   |         |         |         |  |         |   |         |         |         |       |         |         |   |         |        |  |         |         |   |         |         |  |         |         |   |         |         |  |         |         |   |        |         |       |         |         |         |   |         |  |         |         |         |   |         |  |         |        |         |   |         |  |         |         |         |   |         |       |         |         |         |         |   |  |         |         |         |         |   |  |         |         |         |         |   |  |         |         |         |        |   |
|                                                                                                                                                                                                                                                                                                                                                                                                                                                                                                                                                                                                                                                                                                                                                                                                                                                                                                                                                                                                                                                                                                                                                                                                                                                                                                                                                                                                                                                                                                                                                                                                                                                                                                                                                                                                                                                                                                                                                                                                                                                                                                                                                                                                                                                                                                                                                                                                          | 33.9975 | 32.4154       | 32.4154 | 0       | 33.9975 |                                                                  |  |               |       |   |                 |                                                                  |       |           |       |       |             |       |   |           |       |   |              |                                                                                                                                                                                                                                                                                                                                                                                          |  |  |  |  |              |       |  |               |       |   |           |       |         |           |         |        |           |       |         |           |         |         |           |                                                                                                                                                                                                                                                                                                                                                                                          |         |         |         |         |  |       |         |               |         |         |           |        |   |           |         |         |           |         |   |           |         |         |           |         |   |         |         |         |  |         |   |         |         |         |       |         |         |   |         |         |  |         |         |   |         |         |  |        |         |   |         |         |  |         |         |   |         |         |       |         |         |         |   |         |  |         |         |         |   |         |  |         |         |         |   |         |  |         |        |         |   |         |       |         |        |         |         |   |  |         |         |         |         |   |  |         |         |         |         |   |  |         |         |         |         |   |                                                                                                                                                                                                                                                                                                                                                                                                                                                                                                                                                                                                                                                                                                                                                                                                                                                                                                                                                                                                                                                                                                                                                                                                                                                                                                                                                                                                                                                                                                                                                                                                                                                                                                                                                                                                                                                                                                                                                                                                                                                                                                                                                                                                                                                                                                                                                                                                     |  |  |  |  |  |           |  |  |  |  |                 |       |       |       |       |       |             |  |  |  |  |  |              |  |  |  |  |  |              |  |  |  |  |  |       |   |         |         |         |         |  |   |         |         |        |         |  |   |         |         |         |         |  |   |        |         |         |         |       |         |   |         |         |         |  |         |   |        |         |         |  |         |   |         |         |         |  |         |   |         |         |         |       |         |         |   |         |         |  |         |        |   |         |         |  |         |        |   |         |         |  |         |         |   |         |         |       |         |         |         |   |         |  |        |         |         |   |        |  |         |        |        |   |         |  |         |         |         |   |         |       |         |         |         |         |   |  |         |         |         |        |   |  |         |         |         |         |   |  |         |         |         |         |   |                                                                                                                                                                                                                                                                                                                                                                                                                                                                                                                                                                                                                                                                                                                                                                                                                                                                                                                                                                                                                                                                                                                                                                                                                                                                                                                                                                                                                                                                                                                                                                                                                                                                                                                                                                                                                                                                                                                                                                                                                                                                                                                                                                                                                                                                                                                                                                                                           |  |  |  |  |  |           |  |  |  |  |                 |       |       |       |       |       |             |  |  |  |  |  |              |  |  |  |  |  |              |  |  |  |  |  |       |   |         |         |         |         |  |   |         |         |         |         |  |   |         |         |         |         |  |   |         |         |         |         |       |         |   |         |         |         |  |         |   |         |         |         |  |         |   |         |         |         |  |         |   |         |         |         |       |         |         |   |         |        |  |         |         |   |         |         |  |         |         |   |         |         |  |         |         |   |        |         |       |         |         |         |   |         |  |         |         |         |   |         |  |         |        |         |   |         |  |         |         |         |   |         |       |         |         |         |         |   |  |         |         |         |         |   |  |         |         |         |         |   |  |         |         |         |        |   |
|                                                                                                                                                                                                                                                                                                                                                                                                                                                                                                                                                                                                                                                                                                                                                                                                                                                                                                                                                                                                                                                                                                                                                                                                                                                                                                                                                                                                                                                                                                                                                                                                                                                                                                                                                                                                                                                                                                                                                                                                                                                                                                                                                                                                                                                                                                                                                                                                          | -374.63 | -296.84       | -511.15 | 0       | -267.68 |                                                                  |  |               |       |   |                 |                                                                  |       |           |       |       |             |       |   |           |       |   |              |                                                                                                                                                                                                                                                                                                                                                                                          |  |  |  |  |              |       |  |               |       |   |           |       |         |           |         |        |           |       |         |           |         |         |           |                                                                                                                                                                                                                                                                                                                                                                                          |         |         |         |         |  |       |         |               |         |         |           |        |   |           |         |         |           |         |   |           |         |         |           |         |   |         |         |         |  |         |   |         |         |         |       |         |         |   |         |         |  |         |         |   |         |         |  |        |         |   |         |         |  |         |         |   |         |         |       |         |         |         |   |         |  |         |         |         |   |         |  |         |         |         |   |         |  |         |        |         |   |         |       |         |        |         |         |   |  |         |         |         |         |   |  |         |         |         |         |   |  |         |         |         |         |   |                                                                                                                                                                                                                                                                                                                                                                                                                                                                                                                                                                                                                                                                                                                                                                                                                                                                                                                                                                                                                                                                                                                                                                                                                                                                                                                                                                                                                                                                                                                                                                                                                                                                                                                                                                                                                                                                                                                                                                                                                                                                                                                                                                                                                                                                                                                                                                                                     |  |  |  |  |  |           |  |  |  |  |                 |       |       |       |       |       |             |  |  |  |  |  |              |  |  |  |  |  |              |  |  |  |  |  |       |   |         |         |         |         |  |   |         |         |        |         |  |   |         |         |         |         |  |   |        |         |         |         |       |         |   |         |         |         |  |         |   |        |         |         |  |         |   |         |         |         |  |         |   |         |         |         |       |         |         |   |         |         |  |         |        |   |         |         |  |         |        |   |         |         |  |         |         |   |         |         |       |         |         |         |   |         |  |        |         |         |   |        |  |         |        |        |   |         |  |         |         |         |   |         |       |         |         |         |         |   |  |         |         |         |        |   |  |         |         |         |         |   |  |         |         |         |         |   |                                                                                                                                                                                                                                                                                                                                                                                                                                                                                                                                                                                                                                                                                                                                                                                                                                                                                                                                                                                                                                                                                                                                                                                                                                                                                                                                                                                                                                                                                                                                                                                                                                                                                                                                                                                                                                                                                                                                                                                                                                                                                                                                                                                                                                                                                                                                                                                                           |  |  |  |  |  |           |  |  |  |  |                 |       |       |       |       |       |             |  |  |  |  |  |              |  |  |  |  |  |              |  |  |  |  |  |       |   |         |         |         |         |  |   |         |         |         |         |  |   |         |         |         |         |  |   |         |         |         |         |       |         |   |         |         |         |  |         |   |         |         |         |  |         |   |         |         |         |  |         |   |         |         |         |       |         |         |   |         |        |  |         |         |   |         |         |  |         |         |   |         |         |  |         |         |   |        |         |       |         |         |         |   |         |  |         |         |         |   |         |  |         |        |         |   |         |  |         |         |         |   |         |       |         |         |         |         |   |  |         |         |         |         |   |  |         |         |         |         |   |  |         |         |         |        |   |
|                                                                                                                                                                                                                                                                                                                                                                                                                                                                                                                                                                                                                                                                                                                                                                                                                                                                                                                                                                                                                                                                                                                                                                                                                                                                                                                                                                                                                                                                                                                                                                                                                                                                                                                                                                                                                                                                                                                                                                                                                                                                                                                                                                                                                                                                                                                                                                                                          | -173.64 | -105.2        | -319.51 | 0       | -66.689 |                                                                  |  |               |       |   |                 |                                                                  |       |           |       |       |             |       |   |           |       |   |              |                                                                                                                                                                                                                                                                                                                                                                                          |  |  |  |  |              |       |  |               |       |   |           |       |         |           |         |        |           |       |         |           |         |         |           |                                                                                                                                                                                                                                                                                                                                                                                          |         |         |         |         |  |       |         |               |         |         |           |        |   |           |         |         |           |         |   |           |         |         |           |         |   |         |         |         |  |         |   |         |         |         |       |         |         |   |         |         |  |         |         |   |         |         |  |        |         |   |         |         |  |         |         |   |         |         |       |         |         |         |   |         |  |         |         |         |   |         |  |         |         |         |   |         |  |         |        |         |   |         |       |         |        |         |         |   |  |         |         |         |         |   |  |         |         |         |         |   |  |         |         |         |         |   |                                                                                                                                                                                                                                                                                                                                                                                                                                                                                                                                                                                                                                                                                                                                                                                                                                                                                                                                                                                                                                                                                                                                                                                                                                                                                                                                                                                                                                                                                                                                                                                                                                                                                                                                                                                                                                                                                                                                                                                                                                                                                                                                                                                                                                                                                                                                                                                                     |  |  |  |  |  |           |  |  |  |  |                 |       |       |       |       |       |             |  |  |  |  |  |              |  |  |  |  |  |              |  |  |  |  |  |       |   |         |         |         |         |  |   |         |         |        |         |  |   |         |         |         |         |  |   |        |         |         |         |       |         |   |         |         |         |  |         |   |        |         |         |  |         |   |         |         |         |  |         |   |         |         |         |       |         |         |   |         |         |  |         |        |   |         |         |  |         |        |   |         |         |  |         |         |   |         |         |       |         |         |         |   |         |  |        |         |         |   |        |  |         |        |        |   |         |  |         |         |         |   |         |       |         |         |         |         |   |  |         |         |         |        |   |  |         |         |         |         |   |  |         |         |         |         |   |                                                                                                                                                                                                                                                                                                                                                                                                                                                                                                                                                                                                                                                                                                                                                                                                                                                                                                                                                                                                                                                                                                                                                                                                                                                                                                                                                                                                                                                                                                                                                                                                                                                                                                                                                                                                                                                                                                                                                                                                                                                                                                                                                                                                                                                                                                                                                                                                           |  |  |  |  |  |           |  |  |  |  |                 |       |       |       |       |       |             |  |  |  |  |  |              |  |  |  |  |  |              |  |  |  |  |  |       |   |         |         |         |         |  |   |         |         |         |         |  |   |         |         |         |         |  |   |         |         |         |         |       |         |   |         |         |         |  |         |   |         |         |         |  |         |   |         |         |         |  |         |   |         |         |         |       |         |         |   |         |        |  |         |         |   |         |         |  |         |         |   |         |         |  |         |         |   |        |         |       |         |         |         |   |         |  |         |         |         |   |         |  |         |        |         |   |         |  |         |         |         |   |         |       |         |         |         |         |   |  |         |         |         |         |   |  |         |         |         |         |   |  |         |         |         |        |   |
| Sc FI                                                                                                                                                                                                                                                                                                                                                                                                                                                                                                                                                                                                                                                                                                                                                                                                                                                                                                                                                                                                                                                                                                                                                                                                                                                                                                                                                                                                                                                                                                                                                                                                                                                                                                                                                                                                                                                                                                                                                                                                                                                                                                                                                                                                                                                                                                                                                                                                    | -106.95 | -33.83        | -248.14 | 167.187 | 0       |                                                                  |  |               |       |   |                 |                                                                  |       |           |       |       |             |       |   |           |       |   |              |                                                                                                                                                                                                                                                                                                                                                                                          |  |  |  |  |              |       |  |               |       |   |           |       |         |           |         |        |           |       |         |           |         |         |           |                                                                                                                                                                                                                                                                                                                                                                                          |         |         |         |         |  |       |         |               |         |         |           |        |   |           |         |         |           |         |   |           |         |         |           |         |   |         |         |         |  |         |   |         |         |         |       |         |         |   |         |         |  |         |         |   |         |         |  |        |         |   |         |         |  |         |         |   |         |         |       |         |         |         |   |         |  |         |         |         |   |         |  |         |         |         |   |         |  |         |        |         |   |         |       |         |        |         |         |   |  |         |         |         |         |   |  |         |         |         |         |   |  |         |         |         |         |   |                                                                                                                                                                                                                                                                                                                                                                                                                                                                                                                                                                                                                                                                                                                                                                                                                                                                                                                                                                                                                                                                                                                                                                                                                                                                                                                                                                                                                                                                                                                                                                                                                                                                                                                                                                                                                                                                                                                                                                                                                                                                                                                                                                                                                                                                                                                                                                                                     |  |  |  |  |  |           |  |  |  |  |                 |       |       |       |       |       |             |  |  |  |  |  |              |  |  |  |  |  |              |  |  |  |  |  |       |   |         |         |         |         |  |   |         |         |        |         |  |   |         |         |         |         |  |   |        |         |         |         |       |         |   |         |         |         |  |         |   |        |         |         |  |         |   |         |         |         |  |         |   |         |         |         |       |         |         |   |         |         |  |         |        |   |         |         |  |         |        |   |         |         |  |         |         |   |         |         |       |         |         |         |   |         |  |        |         |         |   |        |  |         |        |        |   |         |  |         |         |         |   |         |       |         |         |         |         |   |  |         |         |         |        |   |  |         |         |         |         |   |  |         |         |         |         |   |                                                                                                                                                                                                                                                                                                                                                                                                                                                                                                                                                                                                                                                                                                                                                                                                                                                                                                                                                                                                                                                                                                                                                                                                                                                                                                                                                                                                                                                                                                                                                                                                                                                                                                                                                                                                                                                                                                                                                                                                                                                                                                                                                                                                                                                                                                                                                                                                           |  |  |  |  |  |           |  |  |  |  |                 |       |       |       |       |       |             |  |  |  |  |  |              |  |  |  |  |  |              |  |  |  |  |  |       |   |         |         |         |         |  |   |         |         |         |         |  |   |         |         |         |         |  |   |         |         |         |         |       |         |   |         |         |         |  |         |   |         |         |         |  |         |   |         |         |         |  |         |   |         |         |         |       |         |         |   |         |        |  |         |         |   |         |         |  |         |         |   |         |         |  |         |         |   |        |         |       |         |         |         |   |         |  |         |         |         |   |         |  |         |        |         |   |         |  |         |         |         |   |         |       |         |         |         |         |   |  |         |         |         |         |   |  |         |         |         |         |   |  |         |         |         |        |   |
|                                                                                                                                                                                                                                                                                                                                                                                                                                                                                                                                                                                                                                                                                                                                                                                                                                                                                                                                                                                                                                                                                                                                                                                                                                                                                                                                                                                                                                                                                                                                                                                                                                                                                                                                                                                                                                                                                                                                                                                                                                                                                                                                                                                                                                                                                                                                                                                                          | 35.5092 | 33.9975       | 33.9975 | 33.9975 | 0       |                                                                  |  |               |       |   |                 |                                                                  |       |           |       |       |             |       |   |           |       |   |              |                                                                                                                                                                                                                                                                                                                                                                                          |  |  |  |  |              |       |  |               |       |   |           |       |         |           |         |        |           |       |         |           |         |         |           |                                                                                                                                                                                                                                                                                                                                                                                          |         |         |         |         |  |       |         |               |         |         |           |        |   |           |         |         |           |         |   |           |         |         |           |         |   |         |         |         |  |         |   |         |         |         |       |         |         |   |         |         |  |         |         |   |         |         |  |        |         |   |         |         |  |         |         |   |         |         |       |         |         |         |   |         |  |         |         |         |   |         |  |         |         |         |   |         |  |         |        |         |   |         |       |         |        |         |         |   |  |         |         |         |         |   |  |         |         |         |         |   |  |         |         |         |         |   |                                                                                                                                                                                                                                                                                                                                                                                                                                                                                                                                                                                                                                                                                                                                                                                                                                                                                                                                                                                                                                                                                                                                                                                                                                                                                                                                                                                                                                                                                                                                                                                                                                                                                                                                                                                                                                                                                                                                                                                                                                                                                                                                                                                                                                                                                                                                                                                                     |  |  |  |  |  |           |  |  |  |  |                 |       |       |       |       |       |             |  |  |  |  |  |              |  |  |  |  |  |              |  |  |  |  |  |       |   |         |         |         |         |  |   |         |         |        |         |  |   |         |         |         |         |  |   |        |         |         |         |       |         |   |         |         |         |  |         |   |        |         |         |  |         |   |         |         |         |  |         |   |         |         |         |       |         |         |   |         |         |  |         |        |   |         |         |  |         |        |   |         |         |  |         |         |   |         |         |       |         |         |         |   |         |  |        |         |         |   |        |  |         |        |        |   |         |  |         |         |         |   |         |       |         |         |         |         |   |  |         |         |         |        |   |  |         |         |         |         |   |  |         |         |         |         |   |                                                                                                                                                                                                                                                                                                                                                                                                                                                                                                                                                                                                                                                                                                                                                                                                                                                                                                                                                                                                                                                                                                                                                                                                                                                                                                                                                                                                                                                                                                                                                                                                                                                                                                                                                                                                                                                                                                                                                                                                                                                                                                                                                                                                                                                                                                                                                                                                           |  |  |  |  |  |           |  |  |  |  |                 |       |       |       |       |       |             |  |  |  |  |  |              |  |  |  |  |  |              |  |  |  |  |  |       |   |         |         |         |         |  |   |         |         |         |         |  |   |         |         |         |         |  |   |         |         |         |         |       |         |   |         |         |         |  |         |   |         |         |         |  |         |   |         |         |         |  |         |   |         |         |         |       |         |         |   |         |        |  |         |         |   |         |         |  |         |         |   |         |         |  |         |         |   |        |         |       |         |         |         |   |         |  |         |         |         |   |         |  |         |        |         |   |         |  |         |         |         |   |         |       |         |         |         |         |   |  |         |         |         |         |   |  |         |         |         |         |   |  |         |         |         |        |   |
|                                                                                                                                                                                                                                                                                                                                                                                                                                                                                                                                                                                                                                                                                                                                                                                                                                                                                                                                                                                                                                                                                                                                                                                                                                                                                                                                                                                                                                                                                                                                                                                                                                                                                                                                                                                                                                                                                                                                                                                                                                                                                                                                                                                                                                                                                                                                                                                                          | -211.92 | -134.33       | -348.64 | 66.6891 | 0       |                                                                  |  |               |       |   |                 |                                                                  |       |           |       |       |             |       |   |           |       |   |              |                                                                                                                                                                                                                                                                                                                                                                                          |  |  |  |  |              |       |  |               |       |   |           |       |         |           |         |        |           |       |         |           |         |         |           |                                                                                                                                                                                                                                                                                                                                                                                          |         |         |         |         |  |       |         |               |         |         |           |        |   |           |         |         |           |         |   |           |         |         |           |         |   |         |         |         |  |         |   |         |         |         |       |         |         |   |         |         |  |         |         |   |         |         |  |        |         |   |         |         |  |         |         |   |         |         |       |         |         |         |   |         |  |         |         |         |   |         |  |         |         |         |   |         |  |         |        |         |   |         |       |         |        |         |         |   |  |         |         |         |         |   |  |         |         |         |         |   |  |         |         |         |         |   |                                                                                                                                                                                                                                                                                                                                                                                                                                                                                                                                                                                                                                                                                                                                                                                                                                                                                                                                                                                                                                                                                                                                                                                                                                                                                                                                                                                                                                                                                                                                                                                                                                                                                                                                                                                                                                                                                                                                                                                                                                                                                                                                                                                                                                                                                                                                                                                                     |  |  |  |  |  |           |  |  |  |  |                 |       |       |       |       |       |             |  |  |  |  |  |              |  |  |  |  |  |              |  |  |  |  |  |       |   |         |         |         |         |  |   |         |         |        |         |  |   |         |         |         |         |  |   |        |         |         |         |       |         |   |         |         |         |  |         |   |        |         |         |  |         |   |         |         |         |  |         |   |         |         |         |       |         |         |   |         |         |  |         |        |   |         |         |  |         |        |   |         |         |  |         |         |   |         |         |       |         |         |         |   |         |  |        |         |         |   |        |  |         |        |        |   |         |  |         |         |         |   |         |       |         |         |         |         |   |  |         |         |         |        |   |  |         |         |         |         |   |  |         |         |         |         |   |                                                                                                                                                                                                                                                                                                                                                                                                                                                                                                                                                                                                                                                                                                                                                                                                                                                                                                                                                                                                                                                                                                                                                                                                                                                                                                                                                                                                                                                                                                                                                                                                                                                                                                                                                                                                                                                                                                                                                                                                                                                                                                                                                                                                                                                                                                                                                                                                           |  |  |  |  |  |           |  |  |  |  |                 |       |       |       |       |       |             |  |  |  |  |  |              |  |  |  |  |  |              |  |  |  |  |  |       |   |         |         |         |         |  |   |         |         |         |         |  |   |         |         |         |         |  |   |         |         |         |         |       |         |   |         |         |         |  |         |   |         |         |         |  |         |   |         |         |         |  |         |   |         |         |         |       |         |         |   |         |        |  |         |         |   |         |         |  |         |         |   |         |         |  |         |         |   |        |         |       |         |         |         |   |         |  |         |         |         |   |         |  |         |        |         |   |         |  |         |         |         |   |         |       |         |         |         |         |   |  |         |         |         |         |   |  |         |         |         |         |   |  |         |         |         |        |   |
|                                                                                                                                                                                                                                                                                                                                                                                                                                                                                                                                                                                                                                                                                                                                                                                                                                                                                                                                                                                                                                                                                                                                                                                                                                                                                                                                                                                                                                                                                                                                                                                                                                                                                                                                                                                                                                                                                                                                                                                                                                                                                                                                                                                                                                                                                                                                                                                                          | -1.9838 | 66.6679       | -147.65 | 267.684 | 0       |                                                                  |  |               |       |   |                 |                                                                  |       |           |       |       |             |       |   |           |       |   |              |                                                                                                                                                                                                                                                                                                                                                                                          |  |  |  |  |              |       |  |               |       |   |           |       |         |           |         |        |           |       |         |           |         |         |           |                                                                                                                                                                                                                                                                                                                                                                                          |         |         |         |         |  |       |         |               |         |         |           |        |   |           |         |         |           |         |   |           |         |         |           |         |   |         |         |         |  |         |   |         |         |         |       |         |         |   |         |         |  |         |         |   |         |         |  |        |         |   |         |         |  |         |         |   |         |         |       |         |         |         |   |         |  |         |         |         |   |         |  |         |         |         |   |         |  |         |        |         |   |         |       |         |        |         |         |   |  |         |         |         |         |   |  |         |         |         |         |   |  |         |         |         |         |   |                                                                                                                                                                                                                                                                                                                                                                                                                                                                                                                                                                                                                                                                                                                                                                                                                                                                                                                                                                                                                                                                                                                                                                                                                                                                                                                                                                                                                                                                                                                                                                                                                                                                                                                                                                                                                                                                                                                                                                                                                                                                                                                                                                                                                                                                                                                                                                                                     |  |  |  |  |  |           |  |  |  |  |                 |       |       |       |       |       |             |  |  |  |  |  |              |  |  |  |  |  |              |  |  |  |  |  |       |   |         |         |         |         |  |   |         |         |        |         |  |   |         |         |         |         |  |   |        |         |         |         |       |         |   |         |         |         |  |         |   |        |         |         |  |         |   |         |         |         |  |         |   |         |         |         |       |         |         |   |         |         |  |         |        |   |         |         |  |         |        |   |         |         |  |         |         |   |         |         |       |         |         |         |   |         |  |        |         |         |   |        |  |         |        |        |   |         |  |         |         |         |   |         |       |         |         |         |         |   |  |         |         |         |        |   |  |         |         |         |         |   |  |         |         |         |         |   |                                                                                                                                                                                                                                                                                                                                                                                                                                                                                                                                                                                                                                                                                                                                                                                                                                                                                                                                                                                                                                                                                                                                                                                                                                                                                                                                                                                                                                                                                                                                                                                                                                                                                                                                                                                                                                                                                                                                                                                                                                                                                                                                                                                                                                                                                                                                                                                                           |  |  |  |  |  |           |  |  |  |  |                 |       |       |       |       |       |             |  |  |  |  |  |              |  |  |  |  |  |              |  |  |  |  |  |       |   |         |         |         |         |  |   |         |         |         |         |  |   |         |         |         |         |  |   |         |         |         |         |       |         |   |         |         |         |  |         |   |         |         |         |  |         |   |         |         |         |  |         |   |         |         |         |       |         |         |   |         |        |  |         |         |   |         |         |  |         |         |   |         |         |  |         |         |   |        |         |       |         |         |         |   |         |  |         |         |         |   |         |  |         |        |         |   |         |  |         |         |         |   |         |       |         |         |         |         |   |  |         |         |         |         |   |  |         |         |         |         |   |  |         |         |         |        |   |
| LSMean[j]                                                                                                                                                                                                                                                                                                                                                                                                                                                                                                                                                                                                                                                                                                                                                                                                                                                                                                                                                                                                                                                                                                                                                                                                                                                                                                                                                                                                                                                                                                                                                                                                                                                                                                                                                                                                                                                                                                                                                                                                                                                                                                                                                                                                                                                                                                                                                                                                |         |               |         |         |         |                                                                  |  |               |       |   |                 |                                                                  |       |           |       |       |             |       |   |           |       |   |              |                                                                                                                                                                                                                                                                                                                                                                                          |  |  |  |  |              |       |  |               |       |   |           |       |         |           |         |        |           |       |         |           |         |         |           |                                                                                                                                                                                                                                                                                                                                                                                          |         |         |         |         |  |       |         |               |         |         |           |        |   |           |         |         |           |         |   |           |         |         |           |         |   |         |         |         |  |         |   |         |         |         |       |         |         |   |         |         |  |         |         |   |         |         |  |        |         |   |         |         |  |         |         |   |         |         |       |         |         |         |   |         |  |         |         |         |   |         |  |         |         |         |   |         |  |         |        |         |   |         |       |         |        |         |         |   |  |         |         |         |         |   |  |         |         |         |         |   |  |         |         |         |         |   |                                                                                                                                                                                                                                                                                                                                                                                                                                                                                                                                                                                                                                                                                                                                                                                                                                                                                                                                                                                                                                                                                                                                                                                                                                                                                                                                                                                                                                                                                                                                                                                                                                                                                                                                                                                                                                                                                                                                                                                                                                                                                                                                                                                                                                                                                                                                                                                                     |  |  |  |  |  |           |  |  |  |  |                 |       |       |       |       |       |             |  |  |  |  |  |              |  |  |  |  |  |              |  |  |  |  |  |       |   |         |         |         |         |  |   |         |         |        |         |  |   |         |         |         |         |  |   |        |         |         |         |       |         |   |         |         |         |  |         |   |        |         |         |  |         |   |         |         |         |  |         |   |         |         |         |       |         |         |   |         |         |  |         |        |   |         |         |  |         |        |   |         |         |  |         |         |   |         |         |       |         |         |         |   |         |  |        |         |         |   |        |  |         |        |        |   |         |  |         |         |         |   |         |       |         |         |         |         |   |  |         |         |         |        |   |  |         |         |         |         |   |  |         |         |         |         |   |                                                                                                                                                                                                                                                                                                                                                                                                                                                                                                                                                                                                                                                                                                                                                                                                                                                                                                                                                                                                                                                                                                                                                                                                                                                                                                                                                                                                                                                                                                                                                                                                                                                                                                                                                                                                                                                                                                                                                                                                                                                                                                                                                                                                                                                                                                                                                                                                           |  |  |  |  |  |           |  |  |  |  |                 |       |       |       |       |       |             |  |  |  |  |  |              |  |  |  |  |  |              |  |  |  |  |  |       |   |         |         |         |         |  |   |         |         |         |         |  |   |         |         |         |         |  |   |         |         |         |         |       |         |   |         |         |         |  |         |   |         |         |         |  |         |   |         |         |         |  |         |   |         |         |         |       |         |         |   |         |        |  |         |         |   |         |         |  |         |         |   |         |         |  |         |         |   |        |         |       |         |         |         |   |         |  |         |         |         |   |         |  |         |        |         |   |         |  |         |         |         |   |         |       |         |         |         |         |   |  |         |         |         |         |   |  |         |         |         |         |   |  |         |         |         |        |   |
| Mean[j]-Mean[j]                                                                                                                                                                                                                                                                                                                                                                                                                                                                                                                                                                                                                                                                                                                                                                                                                                                                                                                                                                                                                                                                                                                                                                                                                                                                                                                                                                                                                                                                                                                                                                                                                                                                                                                                                                                                                                                                                                                                                                                                                                                                                                                                                                                                                                                                                                                                                                                          | Aq-FI   | Dc Aq         | Dc FI   | Sc Aq   | Sc FI   |                                                                  |  |               |       |   |                 |                                                                  |       |           |       |       |             |       |   |           |       |   |              |                                                                                                                                                                                                                                                                                                                                                                                          |  |  |  |  |              |       |  |               |       |   |           |       |         |           |         |        |           |       |         |           |         |         |           |                                                                                                                                                                                                                                                                                                                                                                                          |         |         |         |         |  |       |         |               |         |         |           |        |   |           |         |         |           |         |   |           |         |         |           |         |   |         |         |         |  |         |   |         |         |         |       |         |         |   |         |         |  |         |         |   |         |         |  |        |         |   |         |         |  |         |         |   |         |         |       |         |         |         |   |         |  |         |         |         |   |         |  |         |         |         |   |         |  |         |        |         |   |         |       |         |        |         |         |   |  |         |         |         |         |   |  |         |         |         |         |   |  |         |         |         |         |   |                                                                                                                                                                                                                                                                                                                                                                                                                                                                                                                                                                                                                                                                                                                                                                                                                                                                                                                                                                                                                                                                                                                                                                                                                                                                                                                                                                                                                                                                                                                                                                                                                                                                                                                                                                                                                                                                                                                                                                                                                                                                                                                                                                                                                                                                                                                                                                                                     |  |  |  |  |  |           |  |  |  |  |                 |       |       |       |       |       |             |  |  |  |  |  |              |  |  |  |  |  |              |  |  |  |  |  |       |   |         |         |         |         |  |   |         |         |        |         |  |   |         |         |         |         |  |   |        |         |         |         |       |         |   |         |         |         |  |         |   |        |         |         |  |         |   |         |         |         |  |         |   |         |         |         |       |         |         |   |         |         |  |         |        |   |         |         |  |         |        |   |         |         |  |         |         |   |         |         |       |         |         |         |   |         |  |        |         |         |   |        |  |         |        |        |   |         |  |         |         |         |   |         |       |         |         |         |         |   |  |         |         |         |        |   |  |         |         |         |         |   |  |         |         |         |         |   |                                                                                                                                                                                                                                                                                                                                                                                                                                                                                                                                                                                                                                                                                                                                                                                                                                                                                                                                                                                                                                                                                                                                                                                                                                                                                                                                                                                                                                                                                                                                                                                                                                                                                                                                                                                                                                                                                                                                                                                                                                                                                                                                                                                                                                                                                                                                                                                                           |  |  |  |  |  |           |  |  |  |  |                 |       |       |       |       |       |             |  |  |  |  |  |              |  |  |  |  |  |              |  |  |  |  |  |       |   |         |         |         |         |  |   |         |         |         |         |  |   |         |         |         |         |  |   |         |         |         |         |       |         |   |         |         |         |  |         |   |         |         |         |  |         |   |         |         |         |  |         |   |         |         |         |       |         |         |   |         |        |  |         |         |   |         |         |  |         |         |   |         |         |  |         |         |   |        |         |       |         |         |         |   |         |  |         |         |         |   |         |  |         |        |         |   |         |  |         |         |         |   |         |       |         |         |         |         |   |  |         |         |         |         |   |  |         |         |         |         |   |  |         |         |         |        |   |
| Std Err Dif                                                                                                                                                                                                                                                                                                                                                                                                                                                                                                                                                                                                                                                                                                                                                                                                                                                                                                                                                                                                                                                                                                                                                                                                                                                                                                                                                                                                                                                                                                                                                                                                                                                                                                                                                                                                                                                                                                                                                                                                                                                                                                                                                                                                                                                                                                                                                                                              |         |               |         |         |         |                                                                  |  |               |       |   |                 |                                                                  |       |           |       |       |             |       |   |           |       |   |              |                                                                                                                                                                                                                                                                                                                                                                                          |  |  |  |  |              |       |  |               |       |   |           |       |         |           |         |        |           |       |         |           |         |         |           |                                                                                                                                                                                                                                                                                                                                                                                          |         |         |         |         |  |       |         |               |         |         |           |        |   |           |         |         |           |         |   |           |         |         |           |         |   |         |         |         |  |         |   |         |         |         |       |         |         |   |         |         |  |         |         |   |         |         |  |        |         |   |         |         |  |         |         |   |         |         |       |         |         |         |   |         |  |         |         |         |   |         |  |         |         |         |   |         |  |         |        |         |   |         |       |         |        |         |         |   |  |         |         |         |         |   |  |         |         |         |         |   |  |         |         |         |         |   |                                                                                                                                                                                                                                                                                                                                                                                                                                                                                                                                                                                                                                                                                                                                                                                                                                                                                                                                                                                                                                                                                                                                                                                                                                                                                                                                                                                                                                                                                                                                                                                                                                                                                                                                                                                                                                                                                                                                                                                                                                                                                                                                                                                                                                                                                                                                                                                                     |  |  |  |  |  |           |  |  |  |  |                 |       |       |       |       |       |             |  |  |  |  |  |              |  |  |  |  |  |              |  |  |  |  |  |       |   |         |         |         |         |  |   |         |         |        |         |  |   |         |         |         |         |  |   |        |         |         |         |       |         |   |         |         |         |  |         |   |        |         |         |  |         |   |         |         |         |  |         |   |         |         |         |       |         |         |   |         |         |  |         |        |   |         |         |  |         |        |   |         |         |  |         |         |   |         |         |       |         |         |         |   |         |  |        |         |         |   |        |  |         |        |        |   |         |  |         |         |         |   |         |       |         |         |         |         |   |  |         |         |         |        |   |  |         |         |         |         |   |  |         |         |         |         |   |                                                                                                                                                                                                                                                                                                                                                                                                                                                                                                                                                                                                                                                                                                                                                                                                                                                                                                                                                                                                                                                                                                                                                                                                                                                                                                                                                                                                                                                                                                                                                                                                                                                                                                                                                                                                                                                                                                                                                                                                                                                                                                                                                                                                                                                                                                                                                                                                           |  |  |  |  |  |           |  |  |  |  |                 |       |       |       |       |       |             |  |  |  |  |  |              |  |  |  |  |  |              |  |  |  |  |  |       |   |         |         |         |         |  |   |         |         |         |         |  |   |         |         |         |         |  |   |         |         |         |         |       |         |   |         |         |         |  |         |   |         |         |         |  |         |   |         |         |         |  |         |   |         |         |         |       |         |         |   |         |        |  |         |         |   |         |         |  |         |         |   |         |         |  |         |         |   |        |         |       |         |         |         |   |         |  |         |         |         |   |         |  |         |        |         |   |         |  |         |         |         |   |         |       |         |         |         |         |   |  |         |         |         |         |   |  |         |         |         |         |   |  |         |         |         |        |   |
| Lower CL Dif                                                                                                                                                                                                                                                                                                                                                                                                                                                                                                                                                                                                                                                                                                                                                                                                                                                                                                                                                                                                                                                                                                                                                                                                                                                                                                                                                                                                                                                                                                                                                                                                                                                                                                                                                                                                                                                                                                                                                                                                                                                                                                                                                                                                                                                                                                                                                                                             |         |               |         |         |         |                                                                  |  |               |       |   |                 |                                                                  |       |           |       |       |             |       |   |           |       |   |              |                                                                                                                                                                                                                                                                                                                                                                                          |  |  |  |  |              |       |  |               |       |   |           |       |         |           |         |        |           |       |         |           |         |         |           |                                                                                                                                                                                                                                                                                                                                                                                          |         |         |         |         |  |       |         |               |         |         |           |        |   |           |         |         |           |         |   |           |         |         |           |         |   |         |         |         |  |         |   |         |         |         |       |         |         |   |         |         |  |         |         |   |         |         |  |        |         |   |         |         |  |         |         |   |         |         |       |         |         |         |   |         |  |         |         |         |   |         |  |         |         |         |   |         |  |         |        |         |   |         |       |         |        |         |         |   |  |         |         |         |         |   |  |         |         |         |         |   |  |         |         |         |         |   |                                                                                                                                                                                                                                                                                                                                                                                                                                                                                                                                                                                                                                                                                                                                                                                                                                                                                                                                                                                                                                                                                                                                                                                                                                                                                                                                                                                                                                                                                                                                                                                                                                                                                                                                                                                                                                                                                                                                                                                                                                                                                                                                                                                                                                                                                                                                                                                                     |  |  |  |  |  |           |  |  |  |  |                 |       |       |       |       |       |             |  |  |  |  |  |              |  |  |  |  |  |              |  |  |  |  |  |       |   |         |         |         |         |  |   |         |         |        |         |  |   |         |         |         |         |  |   |        |         |         |         |       |         |   |         |         |         |  |         |   |        |         |         |  |         |   |         |         |         |  |         |   |         |         |         |       |         |         |   |         |         |  |         |        |   |         |         |  |         |        |   |         |         |  |         |         |   |         |         |       |         |         |         |   |         |  |        |         |         |   |        |  |         |        |        |   |         |  |         |         |         |   |         |       |         |         |         |         |   |  |         |         |         |        |   |  |         |         |         |         |   |  |         |         |         |         |   |                                                                                                                                                                                                                                                                                                                                                                                                                                                                                                                                                                                                                                                                                                                                                                                                                                                                                                                                                                                                                                                                                                                                                                                                                                                                                                                                                                                                                                                                                                                                                                                                                                                                                                                                                                                                                                                                                                                                                                                                                                                                                                                                                                                                                                                                                                                                                                                                           |  |  |  |  |  |           |  |  |  |  |                 |       |       |       |       |       |             |  |  |  |  |  |              |  |  |  |  |  |              |  |  |  |  |  |       |   |         |         |         |         |  |   |         |         |         |         |  |   |         |         |         |         |  |   |         |         |         |         |       |         |   |         |         |         |  |         |   |         |         |         |  |         |   |         |         |         |  |         |   |         |         |         |       |         |         |   |         |        |  |         |         |   |         |         |  |         |         |   |         |         |  |         |         |   |        |         |       |         |         |         |   |         |  |         |         |         |   |         |  |         |        |         |   |         |  |         |         |         |   |         |       |         |         |         |         |   |  |         |         |         |         |   |  |         |         |         |         |   |  |         |         |         |        |   |
| Upper CL Dif                                                                                                                                                                                                                                                                                                                                                                                                                                                                                                                                                                                                                                                                                                                                                                                                                                                                                                                                                                                                                                                                                                                                                                                                                                                                                                                                                                                                                                                                                                                                                                                                                                                                                                                                                                                                                                                                                                                                                                                                                                                                                                                                                                                                                                                                                                                                                                                             |         |               |         |         |         |                                                                  |  |               |       |   |                 |                                                                  |       |           |       |       |             |       |   |           |       |   |              |                                                                                                                                                                                                                                                                                                                                                                                          |  |  |  |  |              |       |  |               |       |   |           |       |         |           |         |        |           |       |         |           |         |         |           |                                                                                                                                                                                                                                                                                                                                                                                          |         |         |         |         |  |       |         |               |         |         |           |        |   |           |         |         |           |         |   |           |         |         |           |         |   |         |         |         |  |         |   |         |         |         |       |         |         |   |         |         |  |         |         |   |         |         |  |        |         |   |         |         |  |         |         |   |         |         |       |         |         |         |   |         |  |         |         |         |   |         |  |         |         |         |   |         |  |         |        |         |   |         |       |         |        |         |         |   |  |         |         |         |         |   |  |         |         |         |         |   |  |         |         |         |         |   |                                                                                                                                                                                                                                                                                                                                                                                                                                                                                                                                                                                                                                                                                                                                                                                                                                                                                                                                                                                                                                                                                                                                                                                                                                                                                                                                                                                                                                                                                                                                                                                                                                                                                                                                                                                                                                                                                                                                                                                                                                                                                                                                                                                                                                                                                                                                                                                                     |  |  |  |  |  |           |  |  |  |  |                 |       |       |       |       |       |             |  |  |  |  |  |              |  |  |  |  |  |              |  |  |  |  |  |       |   |         |         |         |         |  |   |         |         |        |         |  |   |         |         |         |         |  |   |        |         |         |         |       |         |   |         |         |         |  |         |   |        |         |         |  |         |   |         |         |         |  |         |   |         |         |         |       |         |         |   |         |         |  |         |        |   |         |         |  |         |        |   |         |         |  |         |         |   |         |         |       |         |         |         |   |         |  |        |         |         |   |        |  |         |        |        |   |         |  |         |         |         |   |         |       |         |         |         |         |   |  |         |         |         |        |   |  |         |         |         |         |   |  |         |         |         |         |   |                                                                                                                                                                                                                                                                                                                                                                                                                                                                                                                                                                                                                                                                                                                                                                                                                                                                                                                                                                                                                                                                                                                                                                                                                                                                                                                                                                                                                                                                                                                                                                                                                                                                                                                                                                                                                                                                                                                                                                                                                                                                                                                                                                                                                                                                                                                                                                                                           |  |  |  |  |  |           |  |  |  |  |                 |       |       |       |       |       |             |  |  |  |  |  |              |  |  |  |  |  |              |  |  |  |  |  |       |   |         |         |         |         |  |   |         |         |         |         |  |   |         |         |         |         |  |   |         |         |         |         |       |         |   |         |         |         |  |         |   |         |         |         |  |         |   |         |         |         |  |         |   |         |         |         |       |         |         |   |         |        |  |         |         |   |         |         |  |         |         |   |         |         |  |         |         |   |        |         |       |         |         |         |   |         |  |         |         |         |   |         |  |         |        |         |   |         |  |         |         |         |   |         |       |         |         |         |         |   |  |         |         |         |         |   |  |         |         |         |         |   |  |         |         |         |        |   |
| Aq-FI                                                                                                                                                                                                                                                                                                                                                                                                                                                                                                                                                                                                                                                                                                                                                                                                                                                                                                                                                                                                                                                                                                                                                                                                                                                                                                                                                                                                                                                                                                                                                                                                                                                                                                                                                                                                                                                                                                                                                                                                                                                                                                                                                                                                                                                                                                                                                                                                    | 0       | 89.7743       | -150.35 | 284.213 | 120.766 |                                                                  |  |               |       |   |                 |                                                                  |       |           |       |       |             |       |   |           |       |   |              |                                                                                                                                                                                                                                                                                                                                                                                          |  |  |  |  |              |       |  |               |       |   |           |       |         |           |         |        |           |       |         |           |         |         |           |                                                                                                                                                                                                                                                                                                                                                                                          |         |         |         |         |  |       |         |               |         |         |           |        |   |           |         |         |           |         |   |           |         |         |           |         |   |         |         |         |  |         |   |         |         |         |       |         |         |   |         |         |  |         |         |   |         |         |  |        |         |   |         |         |  |         |         |   |         |         |       |         |         |         |   |         |  |         |         |         |   |         |  |         |         |         |   |         |  |         |        |         |   |         |       |         |        |         |         |   |  |         |         |         |         |   |  |         |         |         |         |   |  |         |         |         |         |   |                                                                                                                                                                                                                                                                                                                                                                                                                                                                                                                                                                                                                                                                                                                                                                                                                                                                                                                                                                                                                                                                                                                                                                                                                                                                                                                                                                                                                                                                                                                                                                                                                                                                                                                                                                                                                                                                                                                                                                                                                                                                                                                                                                                                                                                                                                                                                                                                     |  |  |  |  |  |           |  |  |  |  |                 |       |       |       |       |       |             |  |  |  |  |  |              |  |  |  |  |  |              |  |  |  |  |  |       |   |         |         |         |         |  |   |         |         |        |         |  |   |         |         |         |         |  |   |        |         |         |         |       |         |   |         |         |         |  |         |   |        |         |         |  |         |   |         |         |         |  |         |   |         |         |         |       |         |         |   |         |         |  |         |        |   |         |         |  |         |        |   |         |         |  |         |         |   |         |         |       |         |         |         |   |         |  |        |         |         |   |        |  |         |        |        |   |         |  |         |         |         |   |         |       |         |         |         |         |   |  |         |         |         |        |   |  |         |         |         |         |   |  |         |         |         |         |   |                                                                                                                                                                                                                                                                                                                                                                                                                                                                                                                                                                                                                                                                                                                                                                                                                                                                                                                                                                                                                                                                                                                                                                                                                                                                                                                                                                                                                                                                                                                                                                                                                                                                                                                                                                                                                                                                                                                                                                                                                                                                                                                                                                                                                                                                                                                                                                                                           |  |  |  |  |  |           |  |  |  |  |                 |       |       |       |       |       |             |  |  |  |  |  |              |  |  |  |  |  |              |  |  |  |  |  |       |   |         |         |         |         |  |   |         |         |         |         |  |   |         |         |         |         |  |   |         |         |         |         |       |         |   |         |         |         |  |         |   |         |         |         |  |         |   |         |         |         |  |         |   |         |         |         |       |         |         |   |         |        |  |         |         |   |         |         |  |         |         |   |         |         |  |         |         |   |        |         |       |         |         |         |   |         |  |         |         |         |   |         |  |         |        |         |   |         |  |         |         |         |   |         |       |         |         |         |         |   |  |         |         |         |         |   |  |         |         |         |         |   |  |         |         |         |        |   |
|                                                                                                                                                                                                                                                                                                                                                                                                                                                                                                                                                                                                                                                                                                                                                                                                                                                                                                                                                                                                                                                                                                                                                                                                                                                                                                                                                                                                                                                                                                                                                                                                                                                                                                                                                                                                                                                                                                                                                                                                                                                                                                                                                                                                                                                                                                                                                                                                          | 0       | 21.4229       | 24.0199 | 20.132  | 22.9021 |                                                                  |  |               |       |   |                 |                                                                  |       |           |       |       |             |       |   |           |       |   |              |                                                                                                                                                                                                                                                                                                                                                                                          |  |  |  |  |              |       |  |               |       |   |           |       |         |           |         |        |           |       |         |           |         |         |           |                                                                                                                                                                                                                                                                                                                                                                                          |         |         |         |         |  |       |         |               |         |         |           |        |   |           |         |         |           |         |   |           |         |         |           |         |   |         |         |         |  |         |   |         |         |         |       |         |         |   |         |         |  |         |         |   |         |         |  |        |         |   |         |         |  |         |         |   |         |         |       |         |         |         |   |         |  |         |         |         |   |         |  |         |         |         |   |         |  |         |        |         |   |         |       |         |        |         |         |   |  |         |         |         |         |   |  |         |         |         |         |   |  |         |         |         |         |   |                                                                                                                                                                                                                                                                                                                                                                                                                                                                                                                                                                                                                                                                                                                                                                                                                                                                                                                                                                                                                                                                                                                                                                                                                                                                                                                                                                                                                                                                                                                                                                                                                                                                                                                                                                                                                                                                                                                                                                                                                                                                                                                                                                                                                                                                                                                                                                                                     |  |  |  |  |  |           |  |  |  |  |                 |       |       |       |       |       |             |  |  |  |  |  |              |  |  |  |  |  |              |  |  |  |  |  |       |   |         |         |         |         |  |   |         |         |        |         |  |   |         |         |         |         |  |   |        |         |         |         |       |         |   |         |         |         |  |         |   |        |         |         |  |         |   |         |         |         |  |         |   |         |         |         |       |         |         |   |         |         |  |         |        |   |         |         |  |         |        |   |         |         |  |         |         |   |         |         |       |         |         |         |   |         |  |        |         |         |   |        |  |         |        |        |   |         |  |         |         |         |   |         |       |         |         |         |         |   |  |         |         |         |        |   |  |         |         |         |         |   |  |         |         |         |         |   |                                                                                                                                                                                                                                                                                                                                                                                                                                                                                                                                                                                                                                                                                                                                                                                                                                                                                                                                                                                                                                                                                                                                                                                                                                                                                                                                                                                                                                                                                                                                                                                                                                                                                                                                                                                                                                                                                                                                                                                                                                                                                                                                                                                                                                                                                                                                                                                                           |  |  |  |  |  |           |  |  |  |  |                 |       |       |       |       |       |             |  |  |  |  |  |              |  |  |  |  |  |              |  |  |  |  |  |       |   |         |         |         |         |  |   |         |         |         |         |  |   |         |         |         |         |  |   |         |         |         |         |       |         |   |         |         |         |  |         |   |         |         |         |  |         |   |         |         |         |  |         |   |         |         |         |       |         |         |   |         |        |  |         |         |   |         |         |  |         |         |   |         |         |  |         |         |   |        |         |       |         |         |         |   |         |  |         |         |         |   |         |  |         |        |         |   |         |  |         |         |         |   |         |       |         |         |         |         |   |  |         |         |         |         |   |  |         |         |         |         |   |  |         |         |         |        |   |
|                                                                                                                                                                                                                                                                                                                                                                                                                                                                                                                                                                                                                                                                                                                                                                                                                                                                                                                                                                                                                                                                                                                                                                                                                                                                                                                                                                                                                                                                                                                                                                                                                                                                                                                                                                                                                                                                                                                                                                                                                                                                                                                                                                                                                                                                                                                                                                                                          | 0       | 27.7589       | -219.88 | 225.934 | 54.4688 |                                                                  |  |               |       |   |                 |                                                                  |       |           |       |       |             |       |   |           |       |   |              |                                                                                                                                                                                                                                                                                                                                                                                          |  |  |  |  |              |       |  |               |       |   |           |       |         |           |         |        |           |       |         |           |         |         |           |                                                                                                                                                                                                                                                                                                                                                                                          |         |         |         |         |  |       |         |               |         |         |           |        |   |           |         |         |           |         |   |           |         |         |           |         |   |         |         |         |  |         |   |         |         |         |       |         |         |   |         |         |  |         |         |   |         |         |  |        |         |   |         |         |  |         |         |   |         |         |       |         |         |         |   |         |  |         |         |         |   |         |  |         |         |         |   |         |  |         |        |         |   |         |       |         |        |         |         |   |  |         |         |         |         |   |  |         |         |         |         |   |  |         |         |         |         |   |                                                                                                                                                                                                                                                                                                                                                                                                                                                                                                                                                                                                                                                                                                                                                                                                                                                                                                                                                                                                                                                                                                                                                                                                                                                                                                                                                                                                                                                                                                                                                                                                                                                                                                                                                                                                                                                                                                                                                                                                                                                                                                                                                                                                                                                                                                                                                                                                     |  |  |  |  |  |           |  |  |  |  |                 |       |       |       |       |       |             |  |  |  |  |  |              |  |  |  |  |  |              |  |  |  |  |  |       |   |         |         |         |         |  |   |         |         |        |         |  |   |         |         |         |         |  |   |        |         |         |         |       |         |   |         |         |         |  |         |   |        |         |         |  |         |   |         |         |         |  |         |   |         |         |         |       |         |         |   |         |         |  |         |        |   |         |         |  |         |        |   |         |         |  |         |         |   |         |         |       |         |         |         |   |         |  |        |         |         |   |        |  |         |        |        |   |         |  |         |         |         |   |         |       |         |         |         |         |   |  |         |         |         |        |   |  |         |         |         |         |   |  |         |         |         |         |   |                                                                                                                                                                                                                                                                                                                                                                                                                                                                                                                                                                                                                                                                                                                                                                                                                                                                                                                                                                                                                                                                                                                                                                                                                                                                                                                                                                                                                                                                                                                                                                                                                                                                                                                                                                                                                                                                                                                                                                                                                                                                                                                                                                                                                                                                                                                                                                                                           |  |  |  |  |  |           |  |  |  |  |                 |       |       |       |       |       |             |  |  |  |  |  |              |  |  |  |  |  |              |  |  |  |  |  |       |   |         |         |         |         |  |   |         |         |         |         |  |   |         |         |         |         |  |   |         |         |         |         |       |         |   |         |         |         |  |         |   |         |         |         |  |         |   |         |         |         |  |         |   |         |         |         |       |         |         |   |         |        |  |         |         |   |         |         |  |         |         |   |         |         |  |         |         |   |        |         |       |         |         |         |   |         |  |         |         |         |   |         |  |         |        |         |   |         |  |         |         |         |   |         |       |         |         |         |         |   |  |         |         |         |         |   |  |         |         |         |         |   |  |         |         |         |        |   |
|                                                                                                                                                                                                                                                                                                                                                                                                                                                                                                                                                                                                                                                                                                                                                                                                                                                                                                                                                                                                                                                                                                                                                                                                                                                                                                                                                                                                                                                                                                                                                                                                                                                                                                                                                                                                                                                                                                                                                                                                                                                                                                                                                                                                                                                                                                                                                                                                          | 0       | 151.79        | -80.816 | 342.491 | 187.063 |                                                                  |  |               |       |   |                 |                                                                  |       |           |       |       |             |       |   |           |       |   |              |                                                                                                                                                                                                                                                                                                                                                                                          |  |  |  |  |              |       |  |               |       |   |           |       |         |           |         |        |           |       |         |           |         |         |           |                                                                                                                                                                                                                                                                                                                                                                                          |         |         |         |         |  |       |         |               |         |         |           |        |   |           |         |         |           |         |   |           |         |         |           |         |   |         |         |         |  |         |   |         |         |         |       |         |         |   |         |         |  |         |         |   |         |         |  |        |         |   |         |         |  |         |         |   |         |         |       |         |         |         |   |         |  |         |         |         |   |         |  |         |         |         |   |         |  |         |        |         |   |         |       |         |        |         |         |   |  |         |         |         |         |   |  |         |         |         |         |   |  |         |         |         |         |   |                                                                                                                                                                                                                                                                                                                                                                                                                                                                                                                                                                                                                                                                                                                                                                                                                                                                                                                                                                                                                                                                                                                                                                                                                                                                                                                                                                                                                                                                                                                                                                                                                                                                                                                                                                                                                                                                                                                                                                                                                                                                                                                                                                                                                                                                                                                                                                                                     |  |  |  |  |  |           |  |  |  |  |                 |       |       |       |       |       |             |  |  |  |  |  |              |  |  |  |  |  |              |  |  |  |  |  |       |   |         |         |         |         |  |   |         |         |        |         |  |   |         |         |         |         |  |   |        |         |         |         |       |         |   |         |         |         |  |         |   |        |         |         |  |         |   |         |         |         |  |         |   |         |         |         |       |         |         |   |         |         |  |         |        |   |         |         |  |         |        |   |         |         |  |         |         |   |         |         |       |         |         |         |   |         |  |        |         |         |   |        |  |         |        |        |   |         |  |         |         |         |   |         |       |         |         |         |         |   |  |         |         |         |        |   |  |         |         |         |         |   |  |         |         |         |         |   |                                                                                                                                                                                                                                                                                                                                                                                                                                                                                                                                                                                                                                                                                                                                                                                                                                                                                                                                                                                                                                                                                                                                                                                                                                                                                                                                                                                                                                                                                                                                                                                                                                                                                                                                                                                                                                                                                                                                                                                                                                                                                                                                                                                                                                                                                                                                                                                                           |  |  |  |  |  |           |  |  |  |  |                 |       |       |       |       |       |             |  |  |  |  |  |              |  |  |  |  |  |              |  |  |  |  |  |       |   |         |         |         |         |  |   |         |         |         |         |  |   |         |         |         |         |  |   |         |         |         |         |       |         |   |         |         |         |  |         |   |         |         |         |  |         |   |         |         |         |  |         |   |         |         |         |       |         |         |   |         |        |  |         |         |   |         |         |  |         |         |   |         |         |  |         |         |   |        |         |       |         |         |         |   |         |  |         |         |         |   |         |  |         |        |         |   |         |  |         |         |         |   |         |       |         |         |         |         |   |  |         |         |         |         |   |  |         |         |         |         |   |  |         |         |         |        |   |
| Dc Aq                                                                                                                                                                                                                                                                                                                                                                                                                                                                                                                                                                                                                                                                                                                                                                                                                                                                                                                                                                                                                                                                                                                                                                                                                                                                                                                                                                                                                                                                                                                                                                                                                                                                                                                                                                                                                                                                                                                                                                                                                                                                                                                                                                                                                                                                                                                                                                                                    | -89.774 | 0             | -240.12 | 194.439 | 30.9918 |                                                                  |  |               |       |   |                 |                                                                  |       |           |       |       |             |       |   |           |       |   |              |                                                                                                                                                                                                                                                                                                                                                                                          |  |  |  |  |              |       |  |               |       |   |           |       |         |           |         |        |           |       |         |           |         |         |           |                                                                                                                                                                                                                                                                                                                                                                                          |         |         |         |         |  |       |         |               |         |         |           |        |   |           |         |         |           |         |   |           |         |         |           |         |   |         |         |         |  |         |   |         |         |         |       |         |         |   |         |         |  |         |         |   |         |         |  |        |         |   |         |         |  |         |         |   |         |         |       |         |         |         |   |         |  |         |         |         |   |         |  |         |         |         |   |         |  |         |        |         |   |         |       |         |        |         |         |   |  |         |         |         |         |   |  |         |         |         |         |   |  |         |         |         |         |   |                                                                                                                                                                                                                                                                                                                                                                                                                                                                                                                                                                                                                                                                                                                                                                                                                                                                                                                                                                                                                                                                                                                                                                                                                                                                                                                                                                                                                                                                                                                                                                                                                                                                                                                                                                                                                                                                                                                                                                                                                                                                                                                                                                                                                                                                                                                                                                                                     |  |  |  |  |  |           |  |  |  |  |                 |       |       |       |       |       |             |  |  |  |  |  |              |  |  |  |  |  |              |  |  |  |  |  |       |   |         |         |         |         |  |   |         |         |        |         |  |   |         |         |         |         |  |   |        |         |         |         |       |         |   |         |         |         |  |         |   |        |         |         |  |         |   |         |         |         |  |         |   |         |         |         |       |         |         |   |         |         |  |         |        |   |         |         |  |         |        |   |         |         |  |         |         |   |         |         |       |         |         |         |   |         |  |        |         |         |   |        |  |         |        |        |   |         |  |         |         |         |   |         |       |         |         |         |         |   |  |         |         |         |        |   |  |         |         |         |         |   |  |         |         |         |         |   |                                                                                                                                                                                                                                                                                                                                                                                                                                                                                                                                                                                                                                                                                                                                                                                                                                                                                                                                                                                                                                                                                                                                                                                                                                                                                                                                                                                                                                                                                                                                                                                                                                                                                                                                                                                                                                                                                                                                                                                                                                                                                                                                                                                                                                                                                                                                                                                                           |  |  |  |  |  |           |  |  |  |  |                 |       |       |       |       |       |             |  |  |  |  |  |              |  |  |  |  |  |              |  |  |  |  |  |       |   |         |         |         |         |  |   |         |         |         |         |  |   |         |         |         |         |  |   |         |         |         |         |       |         |   |         |         |         |  |         |   |         |         |         |  |         |   |         |         |         |  |         |   |         |         |         |       |         |         |   |         |        |  |         |         |   |         |         |  |         |         |   |         |         |  |         |         |   |        |         |       |         |         |         |   |         |  |         |         |         |   |         |  |         |        |         |   |         |  |         |         |         |   |         |       |         |         |         |         |   |  |         |         |         |         |   |  |         |         |         |         |   |  |         |         |         |        |   |
|                                                                                                                                                                                                                                                                                                                                                                                                                                                                                                                                                                                                                                                                                                                                                                                                                                                                                                                                                                                                                                                                                                                                                                                                                                                                                                                                                                                                                                                                                                                                                                                                                                                                                                                                                                                                                                                                                                                                                                                                                                                                                                                                                                                                                                                                                                                                                                                                          | 21.4229 | 0             | 22.614  | 18.4319 | 21.4229 |                                                                  |  |               |       |   |                 |                                                                  |       |           |       |       |             |       |   |           |       |   |              |                                                                                                                                                                                                                                                                                                                                                                                          |  |  |  |  |              |       |  |               |       |   |           |       |         |           |         |        |           |       |         |           |         |         |           |                                                                                                                                                                                                                                                                                                                                                                                          |         |         |         |         |  |       |         |               |         |         |           |        |   |           |         |         |           |         |   |           |         |         |           |         |   |         |         |         |  |         |   |         |         |         |       |         |         |   |         |         |  |         |         |   |         |         |  |        |         |   |         |         |  |         |         |   |         |         |       |         |         |         |   |         |  |         |         |         |   |         |  |         |         |         |   |         |  |         |        |         |   |         |       |         |        |         |         |   |  |         |         |         |         |   |  |         |         |         |         |   |  |         |         |         |         |   |                                                                                                                                                                                                                                                                                                                                                                                                                                                                                                                                                                                                                                                                                                                                                                                                                                                                                                                                                                                                                                                                                                                                                                                                                                                                                                                                                                                                                                                                                                                                                                                                                                                                                                                                                                                                                                                                                                                                                                                                                                                                                                                                                                                                                                                                                                                                                                                                     |  |  |  |  |  |           |  |  |  |  |                 |       |       |       |       |       |             |  |  |  |  |  |              |  |  |  |  |  |              |  |  |  |  |  |       |   |         |         |         |         |  |   |         |         |        |         |  |   |         |         |         |         |  |   |        |         |         |         |       |         |   |         |         |         |  |         |   |        |         |         |  |         |   |         |         |         |  |         |   |         |         |         |       |         |         |   |         |         |  |         |        |   |         |         |  |         |        |   |         |         |  |         |         |   |         |         |       |         |         |         |   |         |  |        |         |         |   |        |  |         |        |        |   |         |  |         |         |         |   |         |       |         |         |         |         |   |  |         |         |         |        |   |  |         |         |         |         |   |  |         |         |         |         |   |                                                                                                                                                                                                                                                                                                                                                                                                                                                                                                                                                                                                                                                                                                                                                                                                                                                                                                                                                                                                                                                                                                                                                                                                                                                                                                                                                                                                                                                                                                                                                                                                                                                                                                                                                                                                                                                                                                                                                                                                                                                                                                                                                                                                                                                                                                                                                                                                           |  |  |  |  |  |           |  |  |  |  |                 |       |       |       |       |       |             |  |  |  |  |  |              |  |  |  |  |  |              |  |  |  |  |  |       |   |         |         |         |         |  |   |         |         |         |         |  |   |         |         |         |         |  |   |         |         |         |         |       |         |   |         |         |         |  |         |   |         |         |         |  |         |   |         |         |         |  |         |   |         |         |         |       |         |         |   |         |        |  |         |         |   |         |         |  |         |         |   |         |         |  |         |         |   |        |         |       |         |         |         |   |         |  |         |         |         |   |         |  |         |        |         |   |         |  |         |         |         |   |         |       |         |         |         |         |   |  |         |         |         |         |   |  |         |         |         |         |   |  |         |         |         |        |   |
|                                                                                                                                                                                                                                                                                                                                                                                                                                                                                                                                                                                                                                                                                                                                                                                                                                                                                                                                                                                                                                                                                                                                                                                                                                                                                                                                                                                                                                                                                                                                                                                                                                                                                                                                                                                                                                                                                                                                                                                                                                                                                                                                                                                                                                                                                                                                                                                                          | -151.79 | 0             | -305.59 | 141.082 | -31.024 |                                                                  |  |               |       |   |                 |                                                                  |       |           |       |       |             |       |   |           |       |   |              |                                                                                                                                                                                                                                                                                                                                                                                          |  |  |  |  |              |       |  |               |       |   |           |       |         |           |         |        |           |       |         |           |         |         |           |                                                                                                                                                                                                                                                                                                                                                                                          |         |         |         |         |  |       |         |               |         |         |           |        |   |           |         |         |           |         |   |           |         |         |           |         |   |         |         |         |  |         |   |         |         |         |       |         |         |   |         |         |  |         |         |   |         |         |  |        |         |   |         |         |  |         |         |   |         |         |       |         |         |         |   |         |  |         |         |         |   |         |  |         |         |         |   |         |  |         |        |         |   |         |       |         |        |         |         |   |  |         |         |         |         |   |  |         |         |         |         |   |  |         |         |         |         |   |                                                                                                                                                                                                                                                                                                                                                                                                                                                                                                                                                                                                                                                                                                                                                                                                                                                                                                                                                                                                                                                                                                                                                                                                                                                                                                                                                                                                                                                                                                                                                                                                                                                                                                                                                                                                                                                                                                                                                                                                                                                                                                                                                                                                                                                                                                                                                                                                     |  |  |  |  |  |           |  |  |  |  |                 |       |       |       |       |       |             |  |  |  |  |  |              |  |  |  |  |  |              |  |  |  |  |  |       |   |         |         |         |         |  |   |         |         |        |         |  |   |         |         |         |         |  |   |        |         |         |         |       |         |   |         |         |         |  |         |   |        |         |         |  |         |   |         |         |         |  |         |   |         |         |         |       |         |         |   |         |         |  |         |        |   |         |         |  |         |        |   |         |         |  |         |         |   |         |         |       |         |         |         |   |         |  |        |         |         |   |        |  |         |        |        |   |         |  |         |         |         |   |         |       |         |         |         |         |   |  |         |         |         |        |   |  |         |         |         |         |   |  |         |         |         |         |   |                                                                                                                                                                                                                                                                                                                                                                                                                                                                                                                                                                                                                                                                                                                                                                                                                                                                                                                                                                                                                                                                                                                                                                                                                                                                                                                                                                                                                                                                                                                                                                                                                                                                                                                                                                                                                                                                                                                                                                                                                                                                                                                                                                                                                                                                                                                                                                                                           |  |  |  |  |  |           |  |  |  |  |                 |       |       |       |       |       |             |  |  |  |  |  |              |  |  |  |  |  |              |  |  |  |  |  |       |   |         |         |         |         |  |   |         |         |         |         |  |   |         |         |         |         |  |   |         |         |         |         |       |         |   |         |         |         |  |         |   |         |         |         |  |         |   |         |         |         |  |         |   |         |         |         |       |         |         |   |         |        |  |         |         |   |         |         |  |         |         |   |         |         |  |         |         |   |        |         |       |         |         |         |   |         |  |         |         |         |   |         |  |         |        |         |   |         |  |         |         |         |   |         |       |         |         |         |         |   |  |         |         |         |         |   |  |         |         |         |         |   |  |         |         |         |        |   |
|                                                                                                                                                                                                                                                                                                                                                                                                                                                                                                                                                                                                                                                                                                                                                                                                                                                                                                                                                                                                                                                                                                                                                                                                                                                                                                                                                                                                                                                                                                                                                                                                                                                                                                                                                                                                                                                                                                                                                                                                                                                                                                                                                                                                                                                                                                                                                                                                          | -27.759 | 0             | -174.66 | 247.796 | 93.0072 |                                                                  |  |               |       |   |                 |                                                                  |       |           |       |       |             |       |   |           |       |   |              |                                                                                                                                                                                                                                                                                                                                                                                          |  |  |  |  |              |       |  |               |       |   |           |       |         |           |         |        |           |       |         |           |         |         |           |                                                                                                                                                                                                                                                                                                                                                                                          |         |         |         |         |  |       |         |               |         |         |           |        |   |           |         |         |           |         |   |           |         |         |           |         |   |         |         |         |  |         |   |         |         |         |       |         |         |   |         |         |  |         |         |   |         |         |  |        |         |   |         |         |  |         |         |   |         |         |       |         |         |         |   |         |  |         |         |         |   |         |  |         |         |         |   |         |  |         |        |         |   |         |       |         |        |         |         |   |  |         |         |         |         |   |  |         |         |         |         |   |  |         |         |         |         |   |                                                                                                                                                                                                                                                                                                                                                                                                                                                                                                                                                                                                                                                                                                                                                                                                                                                                                                                                                                                                                                                                                                                                                                                                                                                                                                                                                                                                                                                                                                                                                                                                                                                                                                                                                                                                                                                                                                                                                                                                                                                                                                                                                                                                                                                                                                                                                                                                     |  |  |  |  |  |           |  |  |  |  |                 |       |       |       |       |       |             |  |  |  |  |  |              |  |  |  |  |  |              |  |  |  |  |  |       |   |         |         |         |         |  |   |         |         |        |         |  |   |         |         |         |         |  |   |        |         |         |         |       |         |   |         |         |         |  |         |   |        |         |         |  |         |   |         |         |         |  |         |   |         |         |         |       |         |         |   |         |         |  |         |        |   |         |         |  |         |        |   |         |         |  |         |         |   |         |         |       |         |         |         |   |         |  |        |         |         |   |        |  |         |        |        |   |         |  |         |         |         |   |         |       |         |         |         |         |   |  |         |         |         |        |   |  |         |         |         |         |   |  |         |         |         |         |   |                                                                                                                                                                                                                                                                                                                                                                                                                                                                                                                                                                                                                                                                                                                                                                                                                                                                                                                                                                                                                                                                                                                                                                                                                                                                                                                                                                                                                                                                                                                                                                                                                                                                                                                                                                                                                                                                                                                                                                                                                                                                                                                                                                                                                                                                                                                                                                                                           |  |  |  |  |  |           |  |  |  |  |                 |       |       |       |       |       |             |  |  |  |  |  |              |  |  |  |  |  |              |  |  |  |  |  |       |   |         |         |         |         |  |   |         |         |         |         |  |   |         |         |         |         |  |   |         |         |         |         |       |         |   |         |         |         |  |         |   |         |         |         |  |         |   |         |         |         |  |         |   |         |         |         |       |         |         |   |         |        |  |         |         |   |         |         |  |         |         |   |         |         |  |         |         |   |        |         |       |         |         |         |   |         |  |         |         |         |   |         |  |         |        |         |   |         |  |         |         |         |   |         |       |         |         |         |         |   |  |         |         |         |         |   |  |         |         |         |         |   |  |         |         |         |        |   |
| Dc FI                                                                                                                                                                                                                                                                                                                                                                                                                                                                                                                                                                                                                                                                                                                                                                                                                                                                                                                                                                                                                                                                                                                                                                                                                                                                                                                                                                                                                                                                                                                                                                                                                                                                                                                                                                                                                                                                                                                                                                                                                                                                                                                                                                                                                                                                                                                                                                                                    | 150.349 | 240.123       | 0       | 434.562 | 271.115 |                                                                  |  |               |       |   |                 |                                                                  |       |           |       |       |             |       |   |           |       |   |              |                                                                                                                                                                                                                                                                                                                                                                                          |  |  |  |  |              |       |  |               |       |   |           |       |         |           |         |        |           |       |         |           |         |         |           |                                                                                                                                                                                                                                                                                                                                                                                          |         |         |         |         |  |       |         |               |         |         |           |        |   |           |         |         |           |         |   |           |         |         |           |         |   |         |         |         |  |         |   |         |         |         |       |         |         |   |         |         |  |         |         |   |         |         |  |        |         |   |         |         |  |         |         |   |         |         |       |         |         |         |   |         |  |         |         |         |   |         |  |         |         |         |   |         |  |         |        |         |   |         |       |         |        |         |         |   |  |         |         |         |         |   |  |         |         |         |         |   |  |         |         |         |         |   |                                                                                                                                                                                                                                                                                                                                                                                                                                                                                                                                                                                                                                                                                                                                                                                                                                                                                                                                                                                                                                                                                                                                                                                                                                                                                                                                                                                                                                                                                                                                                                                                                                                                                                                                                                                                                                                                                                                                                                                                                                                                                                                                                                                                                                                                                                                                                                                                     |  |  |  |  |  |           |  |  |  |  |                 |       |       |       |       |       |             |  |  |  |  |  |              |  |  |  |  |  |              |  |  |  |  |  |       |   |         |         |         |         |  |   |         |         |        |         |  |   |         |         |         |         |  |   |        |         |         |         |       |         |   |         |         |         |  |         |   |        |         |         |  |         |   |         |         |         |  |         |   |         |         |         |       |         |         |   |         |         |  |         |        |   |         |         |  |         |        |   |         |         |  |         |         |   |         |         |       |         |         |         |   |         |  |        |         |         |   |        |  |         |        |        |   |         |  |         |         |         |   |         |       |         |         |         |         |   |  |         |         |         |        |   |  |         |         |         |         |   |  |         |         |         |         |   |                                                                                                                                                                                                                                                                                                                                                                                                                                                                                                                                                                                                                                                                                                                                                                                                                                                                                                                                                                                                                                                                                                                                                                                                                                                                                                                                                                                                                                                                                                                                                                                                                                                                                                                                                                                                                                                                                                                                                                                                                                                                                                                                                                                                                                                                                                                                                                                                           |  |  |  |  |  |           |  |  |  |  |                 |       |       |       |       |       |             |  |  |  |  |  |              |  |  |  |  |  |              |  |  |  |  |  |       |   |         |         |         |         |  |   |         |         |         |         |  |   |         |         |         |         |  |   |         |         |         |         |       |         |   |         |         |         |  |         |   |         |         |         |  |         |   |         |         |         |  |         |   |         |         |         |       |         |         |   |         |        |  |         |         |   |         |         |  |         |         |   |         |         |  |         |         |   |        |         |       |         |         |         |   |         |  |         |         |         |   |         |  |         |        |         |   |         |  |         |         |         |   |         |       |         |         |         |         |   |  |         |         |         |         |   |  |         |         |         |         |   |  |         |         |         |        |   |
|                                                                                                                                                                                                                                                                                                                                                                                                                                                                                                                                                                                                                                                                                                                                                                                                                                                                                                                                                                                                                                                                                                                                                                                                                                                                                                                                                                                                                                                                                                                                                                                                                                                                                                                                                                                                                                                                                                                                                                                                                                                                                                                                                                                                                                                                                                                                                                                                          | 24.0199 | 22.614        | 0       | 21.3951 | 24.0199 |                                                                  |  |               |       |   |                 |                                                                  |       |           |       |       |             |       |   |           |       |   |              |                                                                                                                                                                                                                                                                                                                                                                                          |  |  |  |  |              |       |  |               |       |   |           |       |         |           |         |        |           |       |         |           |         |         |           |                                                                                                                                                                                                                                                                                                                                                                                          |         |         |         |         |  |       |         |               |         |         |           |        |   |           |         |         |           |         |   |           |         |         |           |         |   |         |         |         |  |         |   |         |         |         |       |         |         |   |         |         |  |         |         |   |         |         |  |        |         |   |         |         |  |         |         |   |         |         |       |         |         |         |   |         |  |         |         |         |   |         |  |         |         |         |   |         |  |         |        |         |   |         |       |         |        |         |         |   |  |         |         |         |         |   |  |         |         |         |         |   |  |         |         |         |         |   |                                                                                                                                                                                                                                                                                                                                                                                                                                                                                                                                                                                                                                                                                                                                                                                                                                                                                                                                                                                                                                                                                                                                                                                                                                                                                                                                                                                                                                                                                                                                                                                                                                                                                                                                                                                                                                                                                                                                                                                                                                                                                                                                                                                                                                                                                                                                                                                                     |  |  |  |  |  |           |  |  |  |  |                 |       |       |       |       |       |             |  |  |  |  |  |              |  |  |  |  |  |              |  |  |  |  |  |       |   |         |         |         |         |  |   |         |         |        |         |  |   |         |         |         |         |  |   |        |         |         |         |       |         |   |         |         |         |  |         |   |        |         |         |  |         |   |         |         |         |  |         |   |         |         |         |       |         |         |   |         |         |  |         |        |   |         |         |  |         |        |   |         |         |  |         |         |   |         |         |       |         |         |         |   |         |  |        |         |         |   |        |  |         |        |        |   |         |  |         |         |         |   |         |       |         |         |         |         |   |  |         |         |         |        |   |  |         |         |         |         |   |  |         |         |         |         |   |                                                                                                                                                                                                                                                                                                                                                                                                                                                                                                                                                                                                                                                                                                                                                                                                                                                                                                                                                                                                                                                                                                                                                                                                                                                                                                                                                                                                                                                                                                                                                                                                                                                                                                                                                                                                                                                                                                                                                                                                                                                                                                                                                                                                                                                                                                                                                                                                           |  |  |  |  |  |           |  |  |  |  |                 |       |       |       |       |       |             |  |  |  |  |  |              |  |  |  |  |  |              |  |  |  |  |  |       |   |         |         |         |         |  |   |         |         |         |         |  |   |         |         |         |         |  |   |         |         |         |         |       |         |   |         |         |         |  |         |   |         |         |         |  |         |   |         |         |         |  |         |   |         |         |         |       |         |         |   |         |        |  |         |         |   |         |         |  |         |         |   |         |         |  |         |         |   |        |         |       |         |         |         |   |         |  |         |         |         |   |         |  |         |        |         |   |         |  |         |         |         |   |         |       |         |         |         |         |   |  |         |         |         |         |   |  |         |         |         |         |   |  |         |         |         |        |   |
|                                                                                                                                                                                                                                                                                                                                                                                                                                                                                                                                                                                                                                                                                                                                                                                                                                                                                                                                                                                                                                                                                                                                                                                                                                                                                                                                                                                                                                                                                                                                                                                                                                                                                                                                                                                                                                                                                                                                                                                                                                                                                                                                                                                                                                                                                                                                                                                                          | 80.8161 | 174.66        | 0       | 372.627 | 201.582 |                                                                  |  |               |       |   |                 |                                                                  |       |           |       |       |             |       |   |           |       |   |              |                                                                                                                                                                                                                                                                                                                                                                                          |  |  |  |  |              |       |  |               |       |   |           |       |         |           |         |        |           |       |         |           |         |         |           |                                                                                                                                                                                                                                                                                                                                                                                          |         |         |         |         |  |       |         |               |         |         |           |        |   |           |         |         |           |         |   |           |         |         |           |         |   |         |         |         |  |         |   |         |         |         |       |         |         |   |         |         |  |         |         |   |         |         |  |        |         |   |         |         |  |         |         |   |         |         |       |         |         |         |   |         |  |         |         |         |   |         |  |         |         |         |   |         |  |         |        |         |   |         |       |         |        |         |         |   |  |         |         |         |         |   |  |         |         |         |         |   |  |         |         |         |         |   |                                                                                                                                                                                                                                                                                                                                                                                                                                                                                                                                                                                                                                                                                                                                                                                                                                                                                                                                                                                                                                                                                                                                                                                                                                                                                                                                                                                                                                                                                                                                                                                                                                                                                                                                                                                                                                                                                                                                                                                                                                                                                                                                                                                                                                                                                                                                                                                                     |  |  |  |  |  |           |  |  |  |  |                 |       |       |       |       |       |             |  |  |  |  |  |              |  |  |  |  |  |              |  |  |  |  |  |       |   |         |         |         |         |  |   |         |         |        |         |  |   |         |         |         |         |  |   |        |         |         |         |       |         |   |         |         |         |  |         |   |        |         |         |  |         |   |         |         |         |  |         |   |         |         |         |       |         |         |   |         |         |  |         |        |   |         |         |  |         |        |   |         |         |  |         |         |   |         |         |       |         |         |         |   |         |  |        |         |         |   |        |  |         |        |        |   |         |  |         |         |         |   |         |       |         |         |         |         |   |  |         |         |         |        |   |  |         |         |         |         |   |  |         |         |         |         |   |                                                                                                                                                                                                                                                                                                                                                                                                                                                                                                                                                                                                                                                                                                                                                                                                                                                                                                                                                                                                                                                                                                                                                                                                                                                                                                                                                                                                                                                                                                                                                                                                                                                                                                                                                                                                                                                                                                                                                                                                                                                                                                                                                                                                                                                                                                                                                                                                           |  |  |  |  |  |           |  |  |  |  |                 |       |       |       |       |       |             |  |  |  |  |  |              |  |  |  |  |  |              |  |  |  |  |  |       |   |         |         |         |         |  |   |         |         |         |         |  |   |         |         |         |         |  |   |         |         |         |         |       |         |   |         |         |         |  |         |   |         |         |         |  |         |   |         |         |         |  |         |   |         |         |         |       |         |         |   |         |        |  |         |         |   |         |         |  |         |         |   |         |         |  |         |         |   |        |         |       |         |         |         |   |         |  |         |         |         |   |         |  |         |        |         |   |         |  |         |         |         |   |         |       |         |         |         |         |   |  |         |         |         |         |   |  |         |         |         |         |   |  |         |         |         |        |   |
|                                                                                                                                                                                                                                                                                                                                                                                                                                                                                                                                                                                                                                                                                                                                                                                                                                                                                                                                                                                                                                                                                                                                                                                                                                                                                                                                                                                                                                                                                                                                                                                                                                                                                                                                                                                                                                                                                                                                                                                                                                                                                                                                                                                                                                                                                                                                                                                                          | 219.882 | 305.587       | 0       | 496.497 | 340.648 |                                                                  |  |               |       |   |                 |                                                                  |       |           |       |       |             |       |   |           |       |   |              |                                                                                                                                                                                                                                                                                                                                                                                          |  |  |  |  |              |       |  |               |       |   |           |       |         |           |         |        |           |       |         |           |         |         |           |                                                                                                                                                                                                                                                                                                                                                                                          |         |         |         |         |  |       |         |               |         |         |           |        |   |           |         |         |           |         |   |           |         |         |           |         |   |         |         |         |  |         |   |         |         |         |       |         |         |   |         |         |  |         |         |   |         |         |  |        |         |   |         |         |  |         |         |   |         |         |       |         |         |         |   |         |  |         |         |         |   |         |  |         |         |         |   |         |  |         |        |         |   |         |       |         |        |         |         |   |  |         |         |         |         |   |  |         |         |         |         |   |  |         |         |         |         |   |                                                                                                                                                                                                                                                                                                                                                                                                                                                                                                                                                                                                                                                                                                                                                                                                                                                                                                                                                                                                                                                                                                                                                                                                                                                                                                                                                                                                                                                                                                                                                                                                                                                                                                                                                                                                                                                                                                                                                                                                                                                                                                                                                                                                                                                                                                                                                                                                     |  |  |  |  |  |           |  |  |  |  |                 |       |       |       |       |       |             |  |  |  |  |  |              |  |  |  |  |  |              |  |  |  |  |  |       |   |         |         |         |         |  |   |         |         |        |         |  |   |         |         |         |         |  |   |        |         |         |         |       |         |   |         |         |         |  |         |   |        |         |         |  |         |   |         |         |         |  |         |   |         |         |         |       |         |         |   |         |         |  |         |        |   |         |         |  |         |        |   |         |         |  |         |         |   |         |         |       |         |         |         |   |         |  |        |         |         |   |        |  |         |        |        |   |         |  |         |         |         |   |         |       |         |         |         |         |   |  |         |         |         |        |   |  |         |         |         |         |   |  |         |         |         |         |   |                                                                                                                                                                                                                                                                                                                                                                                                                                                                                                                                                                                                                                                                                                                                                                                                                                                                                                                                                                                                                                                                                                                                                                                                                                                                                                                                                                                                                                                                                                                                                                                                                                                                                                                                                                                                                                                                                                                                                                                                                                                                                                                                                                                                                                                                                                                                                                                                           |  |  |  |  |  |           |  |  |  |  |                 |       |       |       |       |       |             |  |  |  |  |  |              |  |  |  |  |  |              |  |  |  |  |  |       |   |         |         |         |         |  |   |         |         |         |         |  |   |         |         |         |         |  |   |         |         |         |         |       |         |   |         |         |         |  |         |   |         |         |         |  |         |   |         |         |         |  |         |   |         |         |         |       |         |         |   |         |        |  |         |         |   |         |         |  |         |         |   |         |         |  |         |         |   |        |         |       |         |         |         |   |         |  |         |         |         |   |         |  |         |        |         |   |         |  |         |         |         |   |         |       |         |         |         |         |   |  |         |         |         |         |   |  |         |         |         |         |   |  |         |         |         |        |   |
| Sc Aq                                                                                                                                                                                                                                                                                                                                                                                                                                                                                                                                                                                                                                                                                                                                                                                                                                                                                                                                                                                                                                                                                                                                                                                                                                                                                                                                                                                                                                                                                                                                                                                                                                                                                                                                                                                                                                                                                                                                                                                                                                                                                                                                                                                                                                                                                                                                                                                                    | -284.21 | -194.44       | -434.56 | 0       | -163.45 |                                                                  |  |               |       |   |                 |                                                                  |       |           |       |       |             |       |   |           |       |   |              |                                                                                                                                                                                                                                                                                                                                                                                          |  |  |  |  |              |       |  |               |       |   |           |       |         |           |         |        |           |       |         |           |         |         |           |                                                                                                                                                                                                                                                                                                                                                                                          |         |         |         |         |  |       |         |               |         |         |           |        |   |           |         |         |           |         |   |           |         |         |           |         |   |         |         |         |  |         |   |         |         |         |       |         |         |   |         |         |  |         |         |   |         |         |  |        |         |   |         |         |  |         |         |   |         |         |       |         |         |         |   |         |  |         |         |         |   |         |  |         |         |         |   |         |  |         |        |         |   |         |       |         |        |         |         |   |  |         |         |         |         |   |  |         |         |         |         |   |  |         |         |         |         |   |                                                                                                                                                                                                                                                                                                                                                                                                                                                                                                                                                                                                                                                                                                                                                                                                                                                                                                                                                                                                                                                                                                                                                                                                                                                                                                                                                                                                                                                                                                                                                                                                                                                                                                                                                                                                                                                                                                                                                                                                                                                                                                                                                                                                                                                                                                                                                                                                     |  |  |  |  |  |           |  |  |  |  |                 |       |       |       |       |       |             |  |  |  |  |  |              |  |  |  |  |  |              |  |  |  |  |  |       |   |         |         |         |         |  |   |         |         |        |         |  |   |         |         |         |         |  |   |        |         |         |         |       |         |   |         |         |         |  |         |   |        |         |         |  |         |   |         |         |         |  |         |   |         |         |         |       |         |         |   |         |         |  |         |        |   |         |         |  |         |        |   |         |         |  |         |         |   |         |         |       |         |         |         |   |         |  |        |         |         |   |        |  |         |        |        |   |         |  |         |         |         |   |         |       |         |         |         |         |   |  |         |         |         |        |   |  |         |         |         |         |   |  |         |         |         |         |   |                                                                                                                                                                                                                                                                                                                                                                                                                                                                                                                                                                                                                                                                                                                                                                                                                                                                                                                                                                                                                                                                                                                                                                                                                                                                                                                                                                                                                                                                                                                                                                                                                                                                                                                                                                                                                                                                                                                                                                                                                                                                                                                                                                                                                                                                                                                                                                                                           |  |  |  |  |  |           |  |  |  |  |                 |       |       |       |       |       |             |  |  |  |  |  |              |  |  |  |  |  |              |  |  |  |  |  |       |   |         |         |         |         |  |   |         |         |         |         |  |   |         |         |         |         |  |   |         |         |         |         |       |         |   |         |         |         |  |         |   |         |         |         |  |         |   |         |         |         |  |         |   |         |         |         |       |         |         |   |         |        |  |         |         |   |         |         |  |         |         |   |         |         |  |         |         |   |        |         |       |         |         |         |   |         |  |         |         |         |   |         |  |         |        |         |   |         |  |         |         |         |   |         |       |         |         |         |         |   |  |         |         |         |         |   |  |         |         |         |         |   |  |         |         |         |        |   |
|                                                                                                                                                                                                                                                                                                                                                                                                                                                                                                                                                                                                                                                                                                                                                                                                                                                                                                                                                                                                                                                                                                                                                                                                                                                                                                                                                                                                                                                                                                                                                                                                                                                                                                                                                                                                                                                                                                                                                                                                                                                                                                                                                                                                                                                                                                                                                                                                          | 20.132  | 18.4319       | 21.3951 | 0       | 20.132  |                                                                  |  |               |       |   |                 |                                                                  |       |           |       |       |             |       |   |           |       |   |              |                                                                                                                                                                                                                                                                                                                                                                                          |  |  |  |  |              |       |  |               |       |   |           |       |         |           |         |        |           |       |         |           |         |         |           |                                                                                                                                                                                                                                                                                                                                                                                          |         |         |         |         |  |       |         |               |         |         |           |        |   |           |         |         |           |         |   |           |         |         |           |         |   |         |         |         |  |         |   |         |         |         |       |         |         |   |         |         |  |         |         |   |         |         |  |        |         |   |         |         |  |         |         |   |         |         |       |         |         |         |   |         |  |         |         |         |   |         |  |         |         |         |   |         |  |         |        |         |   |         |       |         |        |         |         |   |  |         |         |         |         |   |  |         |         |         |         |   |  |         |         |         |         |   |                                                                                                                                                                                                                                                                                                                                                                                                                                                                                                                                                                                                                                                                                                                                                                                                                                                                                                                                                                                                                                                                                                                                                                                                                                                                                                                                                                                                                                                                                                                                                                                                                                                                                                                                                                                                                                                                                                                                                                                                                                                                                                                                                                                                                                                                                                                                                                                                     |  |  |  |  |  |           |  |  |  |  |                 |       |       |       |       |       |             |  |  |  |  |  |              |  |  |  |  |  |              |  |  |  |  |  |       |   |         |         |         |         |  |   |         |         |        |         |  |   |         |         |         |         |  |   |        |         |         |         |       |         |   |         |         |         |  |         |   |        |         |         |  |         |   |         |         |         |  |         |   |         |         |         |       |         |         |   |         |         |  |         |        |   |         |         |  |         |        |   |         |         |  |         |         |   |         |         |       |         |         |         |   |         |  |        |         |         |   |        |  |         |        |        |   |         |  |         |         |         |   |         |       |         |         |         |         |   |  |         |         |         |        |   |  |         |         |         |         |   |  |         |         |         |         |   |                                                                                                                                                                                                                                                                                                                                                                                                                                                                                                                                                                                                                                                                                                                                                                                                                                                                                                                                                                                                                                                                                                                                                                                                                                                                                                                                                                                                                                                                                                                                                                                                                                                                                                                                                                                                                                                                                                                                                                                                                                                                                                                                                                                                                                                                                                                                                                                                           |  |  |  |  |  |           |  |  |  |  |                 |       |       |       |       |       |             |  |  |  |  |  |              |  |  |  |  |  |              |  |  |  |  |  |       |   |         |         |         |         |  |   |         |         |         |         |  |   |         |         |         |         |  |   |         |         |         |         |       |         |   |         |         |         |  |         |   |         |         |         |  |         |   |         |         |         |  |         |   |         |         |         |       |         |         |   |         |        |  |         |         |   |         |         |  |         |         |   |         |         |  |         |         |   |        |         |       |         |         |         |   |         |  |         |         |         |   |         |  |         |        |         |   |         |  |         |         |         |   |         |       |         |         |         |         |   |  |         |         |         |         |   |  |         |         |         |         |   |  |         |         |         |        |   |
|                                                                                                                                                                                                                                                                                                                                                                                                                                                                                                                                                                                                                                                                                                                                                                                                                                                                                                                                                                                                                                                                                                                                                                                                                                                                                                                                                                                                                                                                                                                                                                                                                                                                                                                                                                                                                                                                                                                                                                                                                                                                                                                                                                                                                                                                                                                                                                                                          | -342.49 | -247.8        | -496.5  | 0       | -221.73 |                                                                  |  |               |       |   |                 |                                                                  |       |           |       |       |             |       |   |           |       |   |              |                                                                                                                                                                                                                                                                                                                                                                                          |  |  |  |  |              |       |  |               |       |   |           |       |         |           |         |        |           |       |         |           |         |         |           |                                                                                                                                                                                                                                                                                                                                                                                          |         |         |         |         |  |       |         |               |         |         |           |        |   |           |         |         |           |         |   |           |         |         |           |         |   |         |         |         |  |         |   |         |         |         |       |         |         |   |         |         |  |         |         |   |         |         |  |        |         |   |         |         |  |         |         |   |         |         |       |         |         |         |   |         |  |         |         |         |   |         |  |         |         |         |   |         |  |         |        |         |   |         |       |         |        |         |         |   |  |         |         |         |         |   |  |         |         |         |         |   |  |         |         |         |         |   |                                                                                                                                                                                                                                                                                                                                                                                                                                                                                                                                                                                                                                                                                                                                                                                                                                                                                                                                                                                                                                                                                                                                                                                                                                                                                                                                                                                                                                                                                                                                                                                                                                                                                                                                                                                                                                                                                                                                                                                                                                                                                                                                                                                                                                                                                                                                                                                                     |  |  |  |  |  |           |  |  |  |  |                 |       |       |       |       |       |             |  |  |  |  |  |              |  |  |  |  |  |              |  |  |  |  |  |       |   |         |         |         |         |  |   |         |         |        |         |  |   |         |         |         |         |  |   |        |         |         |         |       |         |   |         |         |         |  |         |   |        |         |         |  |         |   |         |         |         |  |         |   |         |         |         |       |         |         |   |         |         |  |         |        |   |         |         |  |         |        |   |         |         |  |         |         |   |         |         |       |         |         |         |   |         |  |        |         |         |   |        |  |         |        |        |   |         |  |         |         |         |   |         |       |         |         |         |         |   |  |         |         |         |        |   |  |         |         |         |         |   |  |         |         |         |         |   |                                                                                                                                                                                                                                                                                                                                                                                                                                                                                                                                                                                                                                                                                                                                                                                                                                                                                                                                                                                                                                                                                                                                                                                                                                                                                                                                                                                                                                                                                                                                                                                                                                                                                                                                                                                                                                                                                                                                                                                                                                                                                                                                                                                                                                                                                                                                                                                                           |  |  |  |  |  |           |  |  |  |  |                 |       |       |       |       |       |             |  |  |  |  |  |              |  |  |  |  |  |              |  |  |  |  |  |       |   |         |         |         |         |  |   |         |         |         |         |  |   |         |         |         |         |  |   |         |         |         |         |       |         |   |         |         |         |  |         |   |         |         |         |  |         |   |         |         |         |  |         |   |         |         |         |       |         |         |   |         |        |  |         |         |   |         |         |  |         |         |   |         |         |  |         |         |   |        |         |       |         |         |         |   |         |  |         |         |         |   |         |  |         |        |         |   |         |  |         |         |         |   |         |       |         |         |         |         |   |  |         |         |         |         |   |  |         |         |         |         |   |  |         |         |         |        |   |
|                                                                                                                                                                                                                                                                                                                                                                                                                                                                                                                                                                                                                                                                                                                                                                                                                                                                                                                                                                                                                                                                                                                                                                                                                                                                                                                                                                                                                                                                                                                                                                                                                                                                                                                                                                                                                                                                                                                                                                                                                                                                                                                                                                                                                                                                                                                                                                                                          | -225.93 | -141.08       | -372.63 | 0       | -105.17 |                                                                  |  |               |       |   |                 |                                                                  |       |           |       |       |             |       |   |           |       |   |              |                                                                                                                                                                                                                                                                                                                                                                                          |  |  |  |  |              |       |  |               |       |   |           |       |         |           |         |        |           |       |         |           |         |         |           |                                                                                                                                                                                                                                                                                                                                                                                          |         |         |         |         |  |       |         |               |         |         |           |        |   |           |         |         |           |         |   |           |         |         |           |         |   |         |         |         |  |         |   |         |         |         |       |         |         |   |         |         |  |         |         |   |         |         |  |        |         |   |         |         |  |         |         |   |         |         |       |         |         |         |   |         |  |         |         |         |   |         |  |         |         |         |   |         |  |         |        |         |   |         |       |         |        |         |         |   |  |         |         |         |         |   |  |         |         |         |         |   |  |         |         |         |         |   |                                                                                                                                                                                                                                                                                                                                                                                                                                                                                                                                                                                                                                                                                                                                                                                                                                                                                                                                                                                                                                                                                                                                                                                                                                                                                                                                                                                                                                                                                                                                                                                                                                                                                                                                                                                                                                                                                                                                                                                                                                                                                                                                                                                                                                                                                                                                                                                                     |  |  |  |  |  |           |  |  |  |  |                 |       |       |       |       |       |             |  |  |  |  |  |              |  |  |  |  |  |              |  |  |  |  |  |       |   |         |         |         |         |  |   |         |         |        |         |  |   |         |         |         |         |  |   |        |         |         |         |       |         |   |         |         |         |  |         |   |        |         |         |  |         |   |         |         |         |  |         |   |         |         |         |       |         |         |   |         |         |  |         |        |   |         |         |  |         |        |   |         |         |  |         |         |   |         |         |       |         |         |         |   |         |  |        |         |         |   |        |  |         |        |        |   |         |  |         |         |         |   |         |       |         |         |         |         |   |  |         |         |         |        |   |  |         |         |         |         |   |  |         |         |         |         |   |                                                                                                                                                                                                                                                                                                                                                                                                                                                                                                                                                                                                                                                                                                                                                                                                                                                                                                                                                                                                                                                                                                                                                                                                                                                                                                                                                                                                                                                                                                                                                                                                                                                                                                                                                                                                                                                                                                                                                                                                                                                                                                                                                                                                                                                                                                                                                                                                           |  |  |  |  |  |           |  |  |  |  |                 |       |       |       |       |       |             |  |  |  |  |  |              |  |  |  |  |  |              |  |  |  |  |  |       |   |         |         |         |         |  |   |         |         |         |         |  |   |         |         |         |         |  |   |         |         |         |         |       |         |   |         |         |         |  |         |   |         |         |         |  |         |   |         |         |         |  |         |   |         |         |         |       |         |         |   |         |        |  |         |         |   |         |         |  |         |         |   |         |         |  |         |         |   |        |         |       |         |         |         |   |         |  |         |         |         |   |         |  |         |        |         |   |         |  |         |         |         |   |         |       |         |         |         |         |   |  |         |         |         |         |   |  |         |         |         |         |   |  |         |         |         |        |   |
| Sc FI                                                                                                                                                                                                                                                                                                                                                                                                                                                                                                                                                                                                                                                                                                                                                                                                                                                                                                                                                                                                                                                                                                                                                                                                                                                                                                                                                                                                                                                                                                                                                                                                                                                                                                                                                                                                                                                                                                                                                                                                                                                                                                                                                                                                                                                                                                                                                                                                    | -120.77 | -30.992       | -271.12 | 163.447 | 0       |                                                                  |  |               |       |   |                 |                                                                  |       |           |       |       |             |       |   |           |       |   |              |                                                                                                                                                                                                                                                                                                                                                                                          |  |  |  |  |              |       |  |               |       |   |           |       |         |           |         |        |           |       |         |           |         |         |           |                                                                                                                                                                                                                                                                                                                                                                                          |         |         |         |         |  |       |         |               |         |         |           |        |   |           |         |         |           |         |   |           |         |         |           |         |   |         |         |         |  |         |   |         |         |         |       |         |         |   |         |         |  |         |         |   |         |         |  |        |         |   |         |         |  |         |         |   |         |         |       |         |         |         |   |         |  |         |         |         |   |         |  |         |         |         |   |         |  |         |        |         |   |         |       |         |        |         |         |   |  |         |         |         |         |   |  |         |         |         |         |   |  |         |         |         |         |   |                                                                                                                                                                                                                                                                                                                                                                                                                                                                                                                                                                                                                                                                                                                                                                                                                                                                                                                                                                                                                                                                                                                                                                                                                                                                                                                                                                                                                                                                                                                                                                                                                                                                                                                                                                                                                                                                                                                                                                                                                                                                                                                                                                                                                                                                                                                                                                                                     |  |  |  |  |  |           |  |  |  |  |                 |       |       |       |       |       |             |  |  |  |  |  |              |  |  |  |  |  |              |  |  |  |  |  |       |   |         |         |         |         |  |   |         |         |        |         |  |   |         |         |         |         |  |   |        |         |         |         |       |         |   |         |         |         |  |         |   |        |         |         |  |         |   |         |         |         |  |         |   |         |         |         |       |         |         |   |         |         |  |         |        |   |         |         |  |         |        |   |         |         |  |         |         |   |         |         |       |         |         |         |   |         |  |        |         |         |   |        |  |         |        |        |   |         |  |         |         |         |   |         |       |         |         |         |         |   |  |         |         |         |        |   |  |         |         |         |         |   |  |         |         |         |         |   |                                                                                                                                                                                                                                                                                                                                                                                                                                                                                                                                                                                                                                                                                                                                                                                                                                                                                                                                                                                                                                                                                                                                                                                                                                                                                                                                                                                                                                                                                                                                                                                                                                                                                                                                                                                                                                                                                                                                                                                                                                                                                                                                                                                                                                                                                                                                                                                                           |  |  |  |  |  |           |  |  |  |  |                 |       |       |       |       |       |             |  |  |  |  |  |              |  |  |  |  |  |              |  |  |  |  |  |       |   |         |         |         |         |  |   |         |         |         |         |  |   |         |         |         |         |  |   |         |         |         |         |       |         |   |         |         |         |  |         |   |         |         |         |  |         |   |         |         |         |  |         |   |         |         |         |       |         |         |   |         |        |  |         |         |   |         |         |  |         |         |   |         |         |  |         |         |   |        |         |       |         |         |         |   |         |  |         |         |         |   |         |  |         |        |         |   |         |  |         |         |         |   |         |       |         |         |         |         |   |  |         |         |         |         |   |  |         |         |         |         |   |  |         |         |         |        |   |
|                                                                                                                                                                                                                                                                                                                                                                                                                                                                                                                                                                                                                                                                                                                                                                                                                                                                                                                                                                                                                                                                                                                                                                                                                                                                                                                                                                                                                                                                                                                                                                                                                                                                                                                                                                                                                                                                                                                                                                                                                                                                                                                                                                                                                                                                                                                                                                                                          | 22.9021 | 21.4229       | 24.0199 | 20.132  | 0       |                                                                  |  |               |       |   |                 |                                                                  |       |           |       |       |             |       |   |           |       |   |              |                                                                                                                                                                                                                                                                                                                                                                                          |  |  |  |  |              |       |  |               |       |   |           |       |         |           |         |        |           |       |         |           |         |         |           |                                                                                                                                                                                                                                                                                                                                                                                          |         |         |         |         |  |       |         |               |         |         |           |        |   |           |         |         |           |         |   |           |         |         |           |         |   |         |         |         |  |         |   |         |         |         |       |         |         |   |         |         |  |         |         |   |         |         |  |        |         |   |         |         |  |         |         |   |         |         |       |         |         |         |   |         |  |         |         |         |   |         |  |         |         |         |   |         |  |         |        |         |   |         |       |         |        |         |         |   |  |         |         |         |         |   |  |         |         |         |         |   |  |         |         |         |         |   |                                                                                                                                                                                                                                                                                                                                                                                                                                                                                                                                                                                                                                                                                                                                                                                                                                                                                                                                                                                                                                                                                                                                                                                                                                                                                                                                                                                                                                                                                                                                                                                                                                                                                                                                                                                                                                                                                                                                                                                                                                                                                                                                                                                                                                                                                                                                                                                                     |  |  |  |  |  |           |  |  |  |  |                 |       |       |       |       |       |             |  |  |  |  |  |              |  |  |  |  |  |              |  |  |  |  |  |       |   |         |         |         |         |  |   |         |         |        |         |  |   |         |         |         |         |  |   |        |         |         |         |       |         |   |         |         |         |  |         |   |        |         |         |  |         |   |         |         |         |  |         |   |         |         |         |       |         |         |   |         |         |  |         |        |   |         |         |  |         |        |   |         |         |  |         |         |   |         |         |       |         |         |         |   |         |  |        |         |         |   |        |  |         |        |        |   |         |  |         |         |         |   |         |       |         |         |         |         |   |  |         |         |         |        |   |  |         |         |         |         |   |  |         |         |         |         |   |                                                                                                                                                                                                                                                                                                                                                                                                                                                                                                                                                                                                                                                                                                                                                                                                                                                                                                                                                                                                                                                                                                                                                                                                                                                                                                                                                                                                                                                                                                                                                                                                                                                                                                                                                                                                                                                                                                                                                                                                                                                                                                                                                                                                                                                                                                                                                                                                           |  |  |  |  |  |           |  |  |  |  |                 |       |       |       |       |       |             |  |  |  |  |  |              |  |  |  |  |  |              |  |  |  |  |  |       |   |         |         |         |         |  |   |         |         |         |         |  |   |         |         |         |         |  |   |         |         |         |         |       |         |   |         |         |         |  |         |   |         |         |         |  |         |   |         |         |         |  |         |   |         |         |         |       |         |         |   |         |        |  |         |         |   |         |         |  |         |         |   |         |         |  |         |         |   |        |         |       |         |         |         |   |         |  |         |         |         |   |         |  |         |        |         |   |         |  |         |         |         |   |         |       |         |         |         |         |   |  |         |         |         |         |   |  |         |         |         |         |   |  |         |         |         |        |   |
|                                                                                                                                                                                                                                                                                                                                                                                                                                                                                                                                                                                                                                                                                                                                                                                                                                                                                                                                                                                                                                                                                                                                                                                                                                                                                                                                                                                                                                                                                                                                                                                                                                                                                                                                                                                                                                                                                                                                                                                                                                                                                                                                                                                                                                                                                                                                                                                                          | -187.06 | -93.007       | -340.65 | 105.168 | 0       |                                                                  |  |               |       |   |                 |                                                                  |       |           |       |       |             |       |   |           |       |   |              |                                                                                                                                                                                                                                                                                                                                                                                          |  |  |  |  |              |       |  |               |       |   |           |       |         |           |         |        |           |       |         |           |         |         |           |                                                                                                                                                                                                                                                                                                                                                                                          |         |         |         |         |  |       |         |               |         |         |           |        |   |           |         |         |           |         |   |           |         |         |           |         |   |         |         |         |  |         |   |         |         |         |       |         |         |   |         |         |  |         |         |   |         |         |  |        |         |   |         |         |  |         |         |   |         |         |       |         |         |         |   |         |  |         |         |         |   |         |  |         |         |         |   |         |  |         |        |         |   |         |       |         |        |         |         |   |  |         |         |         |         |   |  |         |         |         |         |   |  |         |         |         |         |   |                                                                                                                                                                                                                                                                                                                                                                                                                                                                                                                                                                                                                                                                                                                                                                                                                                                                                                                                                                                                                                                                                                                                                                                                                                                                                                                                                                                                                                                                                                                                                                                                                                                                                                                                                                                                                                                                                                                                                                                                                                                                                                                                                                                                                                                                                                                                                                                                     |  |  |  |  |  |           |  |  |  |  |                 |       |       |       |       |       |             |  |  |  |  |  |              |  |  |  |  |  |              |  |  |  |  |  |       |   |         |         |         |         |  |   |         |         |        |         |  |   |         |         |         |         |  |   |        |         |         |         |       |         |   |         |         |         |  |         |   |        |         |         |  |         |   |         |         |         |  |         |   |         |         |         |       |         |         |   |         |         |  |         |        |   |         |         |  |         |        |   |         |         |  |         |         |   |         |         |       |         |         |         |   |         |  |        |         |         |   |        |  |         |        |        |   |         |  |         |         |         |   |         |       |         |         |         |         |   |  |         |         |         |        |   |  |         |         |         |         |   |  |         |         |         |         |   |                                                                                                                                                                                                                                                                                                                                                                                                                                                                                                                                                                                                                                                                                                                                                                                                                                                                                                                                                                                                                                                                                                                                                                                                                                                                                                                                                                                                                                                                                                                                                                                                                                                                                                                                                                                                                                                                                                                                                                                                                                                                                                                                                                                                                                                                                                                                                                                                           |  |  |  |  |  |           |  |  |  |  |                 |       |       |       |       |       |             |  |  |  |  |  |              |  |  |  |  |  |              |  |  |  |  |  |       |   |         |         |         |         |  |   |         |         |         |         |  |   |         |         |         |         |  |   |         |         |         |         |       |         |   |         |         |         |  |         |   |         |         |         |  |         |   |         |         |         |  |         |   |         |         |         |       |         |         |   |         |        |  |         |         |   |         |         |  |         |         |   |         |         |  |         |         |   |        |         |       |         |         |         |   |         |  |         |         |         |   |         |  |         |        |         |   |         |  |         |         |         |   |         |       |         |         |         |         |   |  |         |         |         |         |   |  |         |         |         |         |   |  |         |         |         |        |   |
|                                                                                                                                                                                                                                                                                                                                                                                                                                                                                                                                                                                                                                                                                                                                                                                                                                                                                                                                                                                                                                                                                                                                                                                                                                                                                                                                                                                                                                                                                                                                                                                                                                                                                                                                                                                                                                                                                                                                                                                                                                                                                                                                                                                                                                                                                                                                                                                                          | -54.469 | 31.0236       | -201.58 | 221.725 | 0       |                                                                  |  |               |       |   |                 |                                                                  |       |           |       |       |             |       |   |           |       |   |              |                                                                                                                                                                                                                                                                                                                                                                                          |  |  |  |  |              |       |  |               |       |   |           |       |         |           |         |        |           |       |         |           |         |         |           |                                                                                                                                                                                                                                                                                                                                                                                          |         |         |         |         |  |       |         |               |         |         |           |        |   |           |         |         |           |         |   |           |         |         |           |         |   |         |         |         |  |         |   |         |         |         |       |         |         |   |         |         |  |         |         |   |         |         |  |        |         |   |         |         |  |         |         |   |         |         |       |         |         |         |   |         |  |         |         |         |   |         |  |         |         |         |   |         |  |         |        |         |   |         |       |         |        |         |         |   |  |         |         |         |         |   |  |         |         |         |         |   |  |         |         |         |         |   |                                                                                                                                                                                                                                                                                                                                                                                                                                                                                                                                                                                                                                                                                                                                                                                                                                                                                                                                                                                                                                                                                                                                                                                                                                                                                                                                                                                                                                                                                                                                                                                                                                                                                                                                                                                                                                                                                                                                                                                                                                                                                                                                                                                                                                                                                                                                                                                                     |  |  |  |  |  |           |  |  |  |  |                 |       |       |       |       |       |             |  |  |  |  |  |              |  |  |  |  |  |              |  |  |  |  |  |       |   |         |         |         |         |  |   |         |         |        |         |  |   |         |         |         |         |  |   |        |         |         |         |       |         |   |         |         |         |  |         |   |        |         |         |  |         |   |         |         |         |  |         |   |         |         |         |       |         |         |   |         |         |  |         |        |   |         |         |  |         |        |   |         |         |  |         |         |   |         |         |       |         |         |         |   |         |  |        |         |         |   |        |  |         |        |        |   |         |  |         |         |         |   |         |       |         |         |         |         |   |  |         |         |         |        |   |  |         |         |         |         |   |  |         |         |         |         |   |                                                                                                                                                                                                                                                                                                                                                                                                                                                                                                                                                                                                                                                                                                                                                                                                                                                                                                                                                                                                                                                                                                                                                                                                                                                                                                                                                                                                                                                                                                                                                                                                                                                                                                                                                                                                                                                                                                                                                                                                                                                                                                                                                                                                                                                                                                                                                                                                           |  |  |  |  |  |           |  |  |  |  |                 |       |       |       |       |       |             |  |  |  |  |  |              |  |  |  |  |  |              |  |  |  |  |  |       |   |         |         |         |         |  |   |         |         |         |         |  |   |         |         |         |         |  |   |         |         |         |         |       |         |   |         |         |         |  |         |   |         |         |         |  |         |   |         |         |         |  |         |   |         |         |         |       |         |         |   |         |        |  |         |         |   |         |         |  |         |         |   |         |         |  |         |         |   |        |         |       |         |         |         |   |         |  |         |         |         |   |         |  |         |        |         |   |         |  |         |         |         |   |         |       |         |         |         |         |   |  |         |         |         |         |   |  |         |         |         |         |   |  |         |         |         |        |   |
| LSMean[j]                                                                                                                                                                                                                                                                                                                                                                                                                                                                                                                                                                                                                                                                                                                                                                                                                                                                                                                                                                                                                                                                                                                                                                                                                                                                                                                                                                                                                                                                                                                                                                                                                                                                                                                                                                                                                                                                                                                                                                                                                                                                                                                                                                                                                                                                                                                                                                                                |         |               |         |         |         |                                                                  |  |               |       |   |                 |                                                                  |       |           |       |       |             |       |   |           |       |   |              |                                                                                                                                                                                                                                                                                                                                                                                          |  |  |  |  |              |       |  |               |       |   |           |       |         |           |         |        |           |       |         |           |         |         |           |                                                                                                                                                                                                                                                                                                                                                                                          |         |         |         |         |  |       |         |               |         |         |           |        |   |           |         |         |           |         |   |           |         |         |           |         |   |         |         |         |  |         |   |         |         |         |       |         |         |   |         |         |  |         |         |   |         |         |  |        |         |   |         |         |  |         |         |   |         |         |       |         |         |         |   |         |  |         |         |         |   |         |  |         |         |         |   |         |  |         |        |         |   |         |       |         |        |         |         |   |  |         |         |         |         |   |  |         |         |         |         |   |  |         |         |         |         |   |                                                                                                                                                                                                                                                                                                                                                                                                                                                                                                                                                                                                                                                                                                                                                                                                                                                                                                                                                                                                                                                                                                                                                                                                                                                                                                                                                                                                                                                                                                                                                                                                                                                                                                                                                                                                                                                                                                                                                                                                                                                                                                                                                                                                                                                                                                                                                                                                     |  |  |  |  |  |           |  |  |  |  |                 |       |       |       |       |       |             |  |  |  |  |  |              |  |  |  |  |  |              |  |  |  |  |  |       |   |         |         |         |         |  |   |         |         |        |         |  |   |         |         |         |         |  |   |        |         |         |         |       |         |   |         |         |         |  |         |   |        |         |         |  |         |   |         |         |         |  |         |   |         |         |         |       |         |         |   |         |         |  |         |        |   |         |         |  |         |        |   |         |         |  |         |         |   |         |         |       |         |         |         |   |         |  |        |         |         |   |        |  |         |        |        |   |         |  |         |         |         |   |         |       |         |         |         |         |   |  |         |         |         |        |   |  |         |         |         |         |   |  |         |         |         |         |   |                                                                                                                                                                                                                                                                                                                                                                                                                                                                                                                                                                                                                                                                                                                                                                                                                                                                                                                                                                                                                                                                                                                                                                                                                                                                                                                                                                                                                                                                                                                                                                                                                                                                                                                                                                                                                                                                                                                                                                                                                                                                                                                                                                                                                                                                                                                                                                                                           |  |  |  |  |  |           |  |  |  |  |                 |       |       |       |       |       |             |  |  |  |  |  |              |  |  |  |  |  |              |  |  |  |  |  |       |   |         |         |         |         |  |   |         |         |         |         |  |   |         |         |         |         |  |   |         |         |         |         |       |         |   |         |         |         |  |         |   |         |         |         |  |         |   |         |         |         |  |         |   |         |         |         |       |         |         |   |         |        |  |         |         |   |         |         |  |         |         |   |         |         |  |         |         |   |        |         |       |         |         |         |   |         |  |         |         |         |   |         |  |         |        |         |   |         |  |         |         |         |   |         |       |         |         |         |         |   |  |         |         |         |         |   |  |         |         |         |         |   |  |         |         |         |        |   |
| Mean[j]-Mean[j]                                                                                                                                                                                                                                                                                                                                                                                                                                                                                                                                                                                                                                                                                                                                                                                                                                                                                                                                                                                                                                                                                                                                                                                                                                                                                                                                                                                                                                                                                                                                                                                                                                                                                                                                                                                                                                                                                                                                                                                                                                                                                                                                                                                                                                                                                                                                                                                          | Aq-FI   | Dc Aq         | Dc FI   | Sc Aq   | Sc FI   |                                                                  |  |               |       |   |                 |                                                                  |       |           |       |       |             |       |   |           |       |   |              |                                                                                                                                                                                                                                                                                                                                                                                          |  |  |  |  |              |       |  |               |       |   |           |       |         |           |         |        |           |       |         |           |         |         |           |                                                                                                                                                                                                                                                                                                                                                                                          |         |         |         |         |  |       |         |               |         |         |           |        |   |           |         |         |           |         |   |           |         |         |           |         |   |         |         |         |  |         |   |         |         |         |       |         |         |   |         |         |  |         |         |   |         |         |  |        |         |   |         |         |  |         |         |   |         |         |       |         |         |         |   |         |  |         |         |         |   |         |  |         |         |         |   |         |  |         |        |         |   |         |       |         |        |         |         |   |  |         |         |         |         |   |  |         |         |         |         |   |  |         |         |         |         |   |                                                                                                                                                                                                                                                                                                                                                                                                                                                                                                                                                                                                                                                                                                                                                                                                                                                                                                                                                                                                                                                                                                                                                                                                                                                                                                                                                                                                                                                                                                                                                                                                                                                                                                                                                                                                                                                                                                                                                                                                                                                                                                                                                                                                                                                                                                                                                                                                     |  |  |  |  |  |           |  |  |  |  |                 |       |       |       |       |       |             |  |  |  |  |  |              |  |  |  |  |  |              |  |  |  |  |  |       |   |         |         |         |         |  |   |         |         |        |         |  |   |         |         |         |         |  |   |        |         |         |         |       |         |   |         |         |         |  |         |   |        |         |         |  |         |   |         |         |         |  |         |   |         |         |         |       |         |         |   |         |         |  |         |        |   |         |         |  |         |        |   |         |         |  |         |         |   |         |         |       |         |         |         |   |         |  |        |         |         |   |        |  |         |        |        |   |         |  |         |         |         |   |         |       |         |         |         |         |   |  |         |         |         |        |   |  |         |         |         |         |   |  |         |         |         |         |   |                                                                                                                                                                                                                                                                                                                                                                                                                                                                                                                                                                                                                                                                                                                                                                                                                                                                                                                                                                                                                                                                                                                                                                                                                                                                                                                                                                                                                                                                                                                                                                                                                                                                                                                                                                                                                                                                                                                                                                                                                                                                                                                                                                                                                                                                                                                                                                                                           |  |  |  |  |  |           |  |  |  |  |                 |       |       |       |       |       |             |  |  |  |  |  |              |  |  |  |  |  |              |  |  |  |  |  |       |   |         |         |         |         |  |   |         |         |         |         |  |   |         |         |         |         |  |   |         |         |         |         |       |         |   |         |         |         |  |         |   |         |         |         |  |         |   |         |         |         |  |         |   |         |         |         |       |         |         |   |         |        |  |         |         |   |         |         |  |         |         |   |         |         |  |         |         |   |        |         |       |         |         |         |   |         |  |         |         |         |   |         |  |         |        |         |   |         |  |         |         |         |   |         |       |         |         |         |         |   |  |         |         |         |         |   |  |         |         |         |         |   |  |         |         |         |        |   |
| Std Err Dif                                                                                                                                                                                                                                                                                                                                                                                                                                                                                                                                                                                                                                                                                                                                                                                                                                                                                                                                                                                                                                                                                                                                                                                                                                                                                                                                                                                                                                                                                                                                                                                                                                                                                                                                                                                                                                                                                                                                                                                                                                                                                                                                                                                                                                                                                                                                                                                              |         |               |         |         |         |                                                                  |  |               |       |   |                 |                                                                  |       |           |       |       |             |       |   |           |       |   |              |                                                                                                                                                                                                                                                                                                                                                                                          |  |  |  |  |              |       |  |               |       |   |           |       |         |           |         |        |           |       |         |           |         |         |           |                                                                                                                                                                                                                                                                                                                                                                                          |         |         |         |         |  |       |         |               |         |         |           |        |   |           |         |         |           |         |   |           |         |         |           |         |   |         |         |         |  |         |   |         |         |         |       |         |         |   |         |         |  |         |         |   |         |         |  |        |         |   |         |         |  |         |         |   |         |         |       |         |         |         |   |         |  |         |         |         |   |         |  |         |         |         |   |         |  |         |        |         |   |         |       |         |        |         |         |   |  |         |         |         |         |   |  |         |         |         |         |   |  |         |         |         |         |   |                                                                                                                                                                                                                                                                                                                                                                                                                                                                                                                                                                                                                                                                                                                                                                                                                                                                                                                                                                                                                                                                                                                                                                                                                                                                                                                                                                                                                                                                                                                                                                                                                                                                                                                                                                                                                                                                                                                                                                                                                                                                                                                                                                                                                                                                                                                                                                                                     |  |  |  |  |  |           |  |  |  |  |                 |       |       |       |       |       |             |  |  |  |  |  |              |  |  |  |  |  |              |  |  |  |  |  |       |   |         |         |         |         |  |   |         |         |        |         |  |   |         |         |         |         |  |   |        |         |         |         |       |         |   |         |         |         |  |         |   |        |         |         |  |         |   |         |         |         |  |         |   |         |         |         |       |         |         |   |         |         |  |         |        |   |         |         |  |         |        |   |         |         |  |         |         |   |         |         |       |         |         |         |   |         |  |        |         |         |   |        |  |         |        |        |   |         |  |         |         |         |   |         |       |         |         |         |         |   |  |         |         |         |        |   |  |         |         |         |         |   |  |         |         |         |         |   |                                                                                                                                                                                                                                                                                                                                                                                                                                                                                                                                                                                                                                                                                                                                                                                                                                                                                                                                                                                                                                                                                                                                                                                                                                                                                                                                                                                                                                                                                                                                                                                                                                                                                                                                                                                                                                                                                                                                                                                                                                                                                                                                                                                                                                                                                                                                                                                                           |  |  |  |  |  |           |  |  |  |  |                 |       |       |       |       |       |             |  |  |  |  |  |              |  |  |  |  |  |              |  |  |  |  |  |       |   |         |         |         |         |  |   |         |         |         |         |  |   |         |         |         |         |  |   |         |         |         |         |       |         |   |         |         |         |  |         |   |         |         |         |  |         |   |         |         |         |  |         |   |         |         |         |       |         |         |   |         |        |  |         |         |   |         |         |  |         |         |   |         |         |  |         |         |   |        |         |       |         |         |         |   |         |  |         |         |         |   |         |  |         |        |         |   |         |  |         |         |         |   |         |       |         |         |         |         |   |  |         |         |         |         |   |  |         |         |         |         |   |  |         |         |         |        |   |
| Lower CL Dif                                                                                                                                                                                                                                                                                                                                                                                                                                                                                                                                                                                                                                                                                                                                                                                                                                                                                                                                                                                                                                                                                                                                                                                                                                                                                                                                                                                                                                                                                                                                                                                                                                                                                                                                                                                                                                                                                                                                                                                                                                                                                                                                                                                                                                                                                                                                                                                             |         |               |         |         |         |                                                                  |  |               |       |   |                 |                                                                  |       |           |       |       |             |       |   |           |       |   |              |                                                                                                                                                                                                                                                                                                                                                                                          |  |  |  |  |              |       |  |               |       |   |           |       |         |           |         |        |           |       |         |           |         |         |           |                                                                                                                                                                                                                                                                                                                                                                                          |         |         |         |         |  |       |         |               |         |         |           |        |   |           |         |         |           |         |   |           |         |         |           |         |   |         |         |         |  |         |   |         |         |         |       |         |         |   |         |         |  |         |         |   |         |         |  |        |         |   |         |         |  |         |         |   |         |         |       |         |         |         |   |         |  |         |         |         |   |         |  |         |         |         |   |         |  |         |        |         |   |         |       |         |        |         |         |   |  |         |         |         |         |   |  |         |         |         |         |   |  |         |         |         |         |   |                                                                                                                                                                                                                                                                                                                                                                                                                                                                                                                                                                                                                                                                                                                                                                                                                                                                                                                                                                                                                                                                                                                                                                                                                                                                                                                                                                                                                                                                                                                                                                                                                                                                                                                                                                                                                                                                                                                                                                                                                                                                                                                                                                                                                                                                                                                                                                                                     |  |  |  |  |  |           |  |  |  |  |                 |       |       |       |       |       |             |  |  |  |  |  |              |  |  |  |  |  |              |  |  |  |  |  |       |   |         |         |         |         |  |   |         |         |        |         |  |   |         |         |         |         |  |   |        |         |         |         |       |         |   |         |         |         |  |         |   |        |         |         |  |         |   |         |         |         |  |         |   |         |         |         |       |         |         |   |         |         |  |         |        |   |         |         |  |         |        |   |         |         |  |         |         |   |         |         |       |         |         |         |   |         |  |        |         |         |   |        |  |         |        |        |   |         |  |         |         |         |   |         |       |         |         |         |         |   |  |         |         |         |        |   |  |         |         |         |         |   |  |         |         |         |         |   |                                                                                                                                                                                                                                                                                                                                                                                                                                                                                                                                                                                                                                                                                                                                                                                                                                                                                                                                                                                                                                                                                                                                                                                                                                                                                                                                                                                                                                                                                                                                                                                                                                                                                                                                                                                                                                                                                                                                                                                                                                                                                                                                                                                                                                                                                                                                                                                                           |  |  |  |  |  |           |  |  |  |  |                 |       |       |       |       |       |             |  |  |  |  |  |              |  |  |  |  |  |              |  |  |  |  |  |       |   |         |         |         |         |  |   |         |         |         |         |  |   |         |         |         |         |  |   |         |         |         |         |       |         |   |         |         |         |  |         |   |         |         |         |  |         |   |         |         |         |  |         |   |         |         |         |       |         |         |   |         |        |  |         |         |   |         |         |  |         |         |   |         |         |  |         |         |   |        |         |       |         |         |         |   |         |  |         |         |         |   |         |  |         |        |         |   |         |  |         |         |         |   |         |       |         |         |         |         |   |  |         |         |         |         |   |  |         |         |         |         |   |  |         |         |         |        |   |
| Upper CL Dif                                                                                                                                                                                                                                                                                                                                                                                                                                                                                                                                                                                                                                                                                                                                                                                                                                                                                                                                                                                                                                                                                                                                                                                                                                                                                                                                                                                                                                                                                                                                                                                                                                                                                                                                                                                                                                                                                                                                                                                                                                                                                                                                                                                                                                                                                                                                                                                             |         |               |         |         |         |                                                                  |  |               |       |   |                 |                                                                  |       |           |       |       |             |       |   |           |       |   |              |                                                                                                                                                                                                                                                                                                                                                                                          |  |  |  |  |              |       |  |               |       |   |           |       |         |           |         |        |           |       |         |           |         |         |           |                                                                                                                                                                                                                                                                                                                                                                                          |         |         |         |         |  |       |         |               |         |         |           |        |   |           |         |         |           |         |   |           |         |         |           |         |   |         |         |         |  |         |   |         |         |         |       |         |         |   |         |         |  |         |         |   |         |         |  |        |         |   |         |         |  |         |         |   |         |         |       |         |         |         |   |         |  |         |         |         |   |         |  |         |         |         |   |         |  |         |        |         |   |         |       |         |        |         |         |   |  |         |         |         |         |   |  |         |         |         |         |   |  |         |         |         |         |   |                                                                                                                                                                                                                                                                                                                                                                                                                                                                                                                                                                                                                                                                                                                                                                                                                                                                                                                                                                                                                                                                                                                                                                                                                                                                                                                                                                                                                                                                                                                                                                                                                                                                                                                                                                                                                                                                                                                                                                                                                                                                                                                                                                                                                                                                                                                                                                                                     |  |  |  |  |  |           |  |  |  |  |                 |       |       |       |       |       |             |  |  |  |  |  |              |  |  |  |  |  |              |  |  |  |  |  |       |   |         |         |         |         |  |   |         |         |        |         |  |   |         |         |         |         |  |   |        |         |         |         |       |         |   |         |         |         |  |         |   |        |         |         |  |         |   |         |         |         |  |         |   |         |         |         |       |         |         |   |         |         |  |         |        |   |         |         |  |         |        |   |         |         |  |         |         |   |         |         |       |         |         |         |   |         |  |        |         |         |   |        |  |         |        |        |   |         |  |         |         |         |   |         |       |         |         |         |         |   |  |         |         |         |        |   |  |         |         |         |         |   |  |         |         |         |         |   |                                                                                                                                                                                                                                                                                                                                                                                                                                                                                                                                                                                                                                                                                                                                                                                                                                                                                                                                                                                                                                                                                                                                                                                                                                                                                                                                                                                                                                                                                                                                                                                                                                                                                                                                                                                                                                                                                                                                                                                                                                                                                                                                                                                                                                                                                                                                                                                                           |  |  |  |  |  |           |  |  |  |  |                 |       |       |       |       |       |             |  |  |  |  |  |              |  |  |  |  |  |              |  |  |  |  |  |       |   |         |         |         |         |  |   |         |         |         |         |  |   |         |         |         |         |  |   |         |         |         |         |       |         |   |         |         |         |  |         |   |         |         |         |  |         |   |         |         |         |  |         |   |         |         |         |       |         |         |   |         |        |  |         |         |   |         |         |  |         |         |   |         |         |  |         |         |   |        |         |       |         |         |         |   |         |  |         |         |         |   |         |  |         |        |         |   |         |  |         |         |         |   |         |       |         |         |         |         |   |  |         |         |         |         |   |  |         |         |         |         |   |  |         |         |         |        |   |
| Aq-FI                                                                                                                                                                                                                                                                                                                                                                                                                                                                                                                                                                                                                                                                                                                                                                                                                                                                                                                                                                                                                                                                                                                                                                                                                                                                                                                                                                                                                                                                                                                                                                                                                                                                                                                                                                                                                                                                                                                                                                                                                                                                                                                                                                                                                                                                                                                                                                                                    | 0       | 130.227       | -122.16 | 392.849 | 202.465 |                                                                  |  |               |       |   |                 |                                                                  |       |           |       |       |             |       |   |           |       |   |              |                                                                                                                                                                                                                                                                                                                                                                                          |  |  |  |  |              |       |  |               |       |   |           |       |         |           |         |        |           |       |         |           |         |         |           |                                                                                                                                                                                                                                                                                                                                                                                          |         |         |         |         |  |       |         |               |         |         |           |        |   |           |         |         |           |         |   |           |         |         |           |         |   |         |         |         |  |         |   |         |         |         |       |         |         |   |         |         |  |         |         |   |         |         |  |        |         |   |         |         |  |         |         |   |         |         |       |         |         |         |   |         |  |         |         |         |   |         |  |         |         |         |   |         |  |         |        |         |   |         |       |         |        |         |         |   |  |         |         |         |         |   |  |         |         |         |         |   |  |         |         |         |         |   |                                                                                                                                                                                                                                                                                                                                                                                                                                                                                                                                                                                                                                                                                                                                                                                                                                                                                                                                                                                                                                                                                                                                                                                                                                                                                                                                                                                                                                                                                                                                                                                                                                                                                                                                                                                                                                                                                                                                                                                                                                                                                                                                                                                                                                                                                                                                                                                                     |  |  |  |  |  |           |  |  |  |  |                 |       |       |       |       |       |             |  |  |  |  |  |              |  |  |  |  |  |              |  |  |  |  |  |       |   |         |         |         |         |  |   |         |         |        |         |  |   |         |         |         |         |  |   |        |         |         |         |       |         |   |         |         |         |  |         |   |        |         |         |  |         |   |         |         |         |  |         |   |         |         |         |       |         |         |   |         |         |  |         |        |   |         |         |  |         |        |   |         |         |  |         |         |   |         |         |       |         |         |         |   |         |  |        |         |         |   |        |  |         |        |        |   |         |  |         |         |         |   |         |       |         |         |         |         |   |  |         |         |         |        |   |  |         |         |         |         |   |  |         |         |         |         |   |                                                                                                                                                                                                                                                                                                                                                                                                                                                                                                                                                                                                                                                                                                                                                                                                                                                                                                                                                                                                                                                                                                                                                                                                                                                                                                                                                                                                                                                                                                                                                                                                                                                                                                                                                                                                                                                                                                                                                                                                                                                                                                                                                                                                                                                                                                                                                                                                           |  |  |  |  |  |           |  |  |  |  |                 |       |       |       |       |       |             |  |  |  |  |  |              |  |  |  |  |  |              |  |  |  |  |  |       |   |         |         |         |         |  |   |         |         |         |         |  |   |         |         |         |         |  |   |         |         |         |         |       |         |   |         |         |         |  |         |   |         |         |         |  |         |   |         |         |         |  |         |   |         |         |         |       |         |         |   |         |        |  |         |         |   |         |         |  |         |         |   |         |         |  |         |         |   |        |         |       |         |         |         |   |         |  |         |         |         |   |         |  |         |        |         |   |         |  |         |         |         |   |         |       |         |         |         |         |   |  |         |         |         |         |   |  |         |         |         |         |   |  |         |         |         |        |   |
|                                                                                                                                                                                                                                                                                                                                                                                                                                                                                                                                                                                                                                                                                                                                                                                                                                                                                                                                                                                                                                                                                                                                                                                                                                                                                                                                                                                                                                                                                                                                                                                                                                                                                                                                                                                                                                                                                                                                                                                                                                                                                                                                                                                                                                                                                                                                                                                                          | 0       | 16.8027       | 16.8027 | 14.6248 | 16.8027 |                                                                  |  |               |       |   |                 |                                                                  |       |           |       |       |             |       |   |           |       |   |              |                                                                                                                                                                                                                                                                                                                                                                                          |  |  |  |  |              |       |  |               |       |   |           |       |         |           |         |        |           |       |         |           |         |         |           |                                                                                                                                                                                                                                                                                                                                                                                          |         |         |         |         |  |       |         |               |         |         |           |        |   |           |         |         |           |         |   |           |         |         |           |         |   |         |         |         |  |         |   |         |         |         |       |         |         |   |         |         |  |         |         |   |         |         |  |        |         |   |         |         |  |         |         |   |         |         |       |         |         |         |   |         |  |         |         |         |   |         |  |         |         |         |   |         |  |         |        |         |   |         |       |         |        |         |         |   |  |         |         |         |         |   |  |         |         |         |         |   |  |         |         |         |         |   |                                                                                                                                                                                                                                                                                                                                                                                                                                                                                                                                                                                                                                                                                                                                                                                                                                                                                                                                                                                                                                                                                                                                                                                                                                                                                                                                                                                                                                                                                                                                                                                                                                                                                                                                                                                                                                                                                                                                                                                                                                                                                                                                                                                                                                                                                                                                                                                                     |  |  |  |  |  |           |  |  |  |  |                 |       |       |       |       |       |             |  |  |  |  |  |              |  |  |  |  |  |              |  |  |  |  |  |       |   |         |         |         |         |  |   |         |         |        |         |  |   |         |         |         |         |  |   |        |         |         |         |       |         |   |         |         |         |  |         |   |        |         |         |  |         |   |         |         |         |  |         |   |         |         |         |       |         |         |   |         |         |  |         |        |   |         |         |  |         |        |   |         |         |  |         |         |   |         |         |       |         |         |         |   |         |  |        |         |         |   |        |  |         |        |        |   |         |  |         |         |         |   |         |       |         |         |         |         |   |  |         |         |         |        |   |  |         |         |         |         |   |  |         |         |         |         |   |                                                                                                                                                                                                                                                                                                                                                                                                                                                                                                                                                                                                                                                                                                                                                                                                                                                                                                                                                                                                                                                                                                                                                                                                                                                                                                                                                                                                                                                                                                                                                                                                                                                                                                                                                                                                                                                                                                                                                                                                                                                                                                                                                                                                                                                                                                                                                                                                           |  |  |  |  |  |           |  |  |  |  |                 |       |       |       |       |       |             |  |  |  |  |  |              |  |  |  |  |  |              |  |  |  |  |  |       |   |         |         |         |         |  |   |         |         |         |         |  |   |         |         |         |         |  |   |         |         |         |         |       |         |   |         |         |         |  |         |   |         |         |         |  |         |   |         |         |         |  |         |   |         |         |         |       |         |         |   |         |        |  |         |         |   |         |         |  |         |         |   |         |         |  |         |         |   |        |         |       |         |         |         |   |         |  |         |         |         |   |         |  |         |        |         |   |         |  |         |         |         |   |         |       |         |         |         |         |   |  |         |         |         |         |   |  |         |         |         |         |   |  |         |         |         |        |   |
|                                                                                                                                                                                                                                                                                                                                                                                                                                                                                                                                                                                                                                                                                                                                                                                                                                                                                                                                                                                                                                                                                                                                                                                                                                                                                                                                                                                                                                                                                                                                                                                                                                                                                                                                                                                                                                                                                                                                                                                                                                                                                                                                                                                                                                                                                                                                                                                                          | 0       | 95.6216       | -156.77 | 362.728 | 167.859 |                                                                  |  |               |       |   |                 |                                                                  |       |           |       |       |             |       |   |           |       |   |              |                                                                                                                                                                                                                                                                                                                                                                                          |  |  |  |  |              |       |  |               |       |   |           |       |         |           |         |        |           |       |         |           |         |         |           |                                                                                                                                                                                                                                                                                                                                                                                          |         |         |         |         |  |       |         |               |         |         |           |        |   |           |         |         |           |         |   |           |         |         |           |         |   |         |         |         |  |         |   |         |         |         |       |         |         |   |         |         |  |         |         |   |         |         |  |        |         |   |         |         |  |         |         |   |         |         |       |         |         |         |   |         |  |         |         |         |   |         |  |         |         |         |   |         |  |         |        |         |   |         |       |         |        |         |         |   |  |         |         |         |         |   |  |         |         |         |         |   |  |         |         |         |         |   |                                                                                                                                                                                                                                                                                                                                                                                                                                                                                                                                                                                                                                                                                                                                                                                                                                                                                                                                                                                                                                                                                                                                                                                                                                                                                                                                                                                                                                                                                                                                                                                                                                                                                                                                                                                                                                                                                                                                                                                                                                                                                                                                                                                                                                                                                                                                                                                                     |  |  |  |  |  |           |  |  |  |  |                 |       |       |       |       |       |             |  |  |  |  |  |              |  |  |  |  |  |              |  |  |  |  |  |       |   |         |         |         |         |  |   |         |         |        |         |  |   |         |         |         |         |  |   |        |         |         |         |       |         |   |         |         |         |  |         |   |        |         |         |  |         |   |         |         |         |  |         |   |         |         |         |       |         |         |   |         |         |  |         |        |   |         |         |  |         |        |   |         |         |  |         |         |   |         |         |       |         |         |         |   |         |  |        |         |         |   |        |  |         |        |        |   |         |  |         |         |         |   |         |       |         |         |         |         |   |  |         |         |         |        |   |  |         |         |         |         |   |  |         |         |         |         |   |                                                                                                                                                                                                                                                                                                                                                                                                                                                                                                                                                                                                                                                                                                                                                                                                                                                                                                                                                                                                                                                                                                                                                                                                                                                                                                                                                                                                                                                                                                                                                                                                                                                                                                                                                                                                                                                                                                                                                                                                                                                                                                                                                                                                                                                                                                                                                                                                           |  |  |  |  |  |           |  |  |  |  |                 |       |       |       |       |       |             |  |  |  |  |  |              |  |  |  |  |  |              |  |  |  |  |  |       |   |         |         |         |         |  |   |         |         |         |         |  |   |         |         |         |         |  |   |         |         |         |         |       |         |   |         |         |         |  |         |   |         |         |         |  |         |   |         |         |         |  |         |   |         |         |         |       |         |         |   |         |        |  |         |         |   |         |         |  |         |         |   |         |         |  |         |         |   |        |         |       |         |         |         |   |         |  |         |         |         |   |         |  |         |        |         |   |         |  |         |         |         |   |         |       |         |         |         |         |   |  |         |         |         |         |   |  |         |         |         |         |   |  |         |         |         |        |   |
|                                                                                                                                                                                                                                                                                                                                                                                                                                                                                                                                                                                                                                                                                                                                                                                                                                                                                                                                                                                                                                                                                                                                                                                                                                                                                                                                                                                                                                                                                                                                                                                                                                                                                                                                                                                                                                                                                                                                                                                                                                                                                                                                                                                                                                                                                                                                                                                                          | 0       | 164.833       | -87.559 | 422.969 | 237.071 |                                                                  |  |               |       |   |                 |                                                                  |       |           |       |       |             |       |   |           |       |   |              |                                                                                                                                                                                                                                                                                                                                                                                          |  |  |  |  |              |       |  |               |       |   |           |       |         |           |         |        |           |       |         |           |         |         |           |                                                                                                                                                                                                                                                                                                                                                                                          |         |         |         |         |  |       |         |               |         |         |           |        |   |           |         |         |           |         |   |           |         |         |           |         |   |         |         |         |  |         |   |         |         |         |       |         |         |   |         |         |  |         |         |   |         |         |  |        |         |   |         |         |  |         |         |   |         |         |       |         |         |         |   |         |  |         |         |         |   |         |  |         |         |         |   |         |  |         |        |         |   |         |       |         |        |         |         |   |  |         |         |         |         |   |  |         |         |         |         |   |  |         |         |         |         |   |                                                                                                                                                                                                                                                                                                                                                                                                                                                                                                                                                                                                                                                                                                                                                                                                                                                                                                                                                                                                                                                                                                                                                                                                                                                                                                                                                                                                                                                                                                                                                                                                                                                                                                                                                                                                                                                                                                                                                                                                                                                                                                                                                                                                                                                                                                                                                                                                     |  |  |  |  |  |           |  |  |  |  |                 |       |       |       |       |       |             |  |  |  |  |  |              |  |  |  |  |  |              |  |  |  |  |  |       |   |         |         |         |         |  |   |         |         |        |         |  |   |         |         |         |         |  |   |        |         |         |         |       |         |   |         |         |         |  |         |   |        |         |         |  |         |   |         |         |         |  |         |   |         |         |         |       |         |         |   |         |         |  |         |        |   |         |         |  |         |        |   |         |         |  |         |         |   |         |         |       |         |         |         |   |         |  |        |         |         |   |        |  |         |        |        |   |         |  |         |         |         |   |         |       |         |         |         |         |   |  |         |         |         |        |   |  |         |         |         |         |   |  |         |         |         |         |   |                                                                                                                                                                                                                                                                                                                                                                                                                                                                                                                                                                                                                                                                                                                                                                                                                                                                                                                                                                                                                                                                                                                                                                                                                                                                                                                                                                                                                                                                                                                                                                                                                                                                                                                                                                                                                                                                                                                                                                                                                                                                                                                                                                                                                                                                                                                                                                                                           |  |  |  |  |  |           |  |  |  |  |                 |       |       |       |       |       |             |  |  |  |  |  |              |  |  |  |  |  |              |  |  |  |  |  |       |   |         |         |         |         |  |   |         |         |         |         |  |   |         |         |         |         |  |   |         |         |         |         |       |         |   |         |         |         |  |         |   |         |         |         |  |         |   |         |         |         |  |         |   |         |         |         |       |         |         |   |         |        |  |         |         |   |         |         |  |         |         |   |         |         |  |         |         |   |        |         |       |         |         |         |   |         |  |         |         |         |   |         |  |         |        |         |   |         |  |         |         |         |   |         |       |         |         |         |         |   |  |         |         |         |         |   |  |         |         |         |         |   |  |         |         |         |        |   |
| Dc Aq                                                                                                                                                                                                                                                                                                                                                                                                                                                                                                                                                                                                                                                                                                                                                                                                                                                                                                                                                                                                                                                                                                                                                                                                                                                                                                                                                                                                                                                                                                                                                                                                                                                                                                                                                                                                                                                                                                                                                                                                                                                                                                                                                                                                                                                                                                                                                                                                    | -130.23 | 0             | -252.39 | 262.621 | 72.2378 |                                                                  |  |               |       |   |                 |                                                                  |       |           |       |       |             |       |   |           |       |   |              |                                                                                                                                                                                                                                                                                                                                                                                          |  |  |  |  |              |       |  |               |       |   |           |       |         |           |         |        |           |       |         |           |         |         |           |                                                                                                                                                                                                                                                                                                                                                                                          |         |         |         |         |  |       |         |               |         |         |           |        |   |           |         |         |           |         |   |           |         |         |           |         |   |         |         |         |  |         |   |         |         |         |       |         |         |   |         |         |  |         |         |   |         |         |  |        |         |   |         |         |  |         |         |   |         |         |       |         |         |         |   |         |  |         |         |         |   |         |  |         |         |         |   |         |  |         |        |         |   |         |       |         |        |         |         |   |  |         |         |         |         |   |  |         |         |         |         |   |  |         |         |         |         |   |                                                                                                                                                                                                                                                                                                                                                                                                                                                                                                                                                                                                                                                                                                                                                                                                                                                                                                                                                                                                                                                                                                                                                                                                                                                                                                                                                                                                                                                                                                                                                                                                                                                                                                                                                                                                                                                                                                                                                                                                                                                                                                                                                                                                                                                                                                                                                                                                     |  |  |  |  |  |           |  |  |  |  |                 |       |       |       |       |       |             |  |  |  |  |  |              |  |  |  |  |  |              |  |  |  |  |  |       |   |         |         |         |         |  |   |         |         |        |         |  |   |         |         |         |         |  |   |        |         |         |         |       |         |   |         |         |         |  |         |   |        |         |         |  |         |   |         |         |         |  |         |   |         |         |         |       |         |         |   |         |         |  |         |        |   |         |         |  |         |        |   |         |         |  |         |         |   |         |         |       |         |         |         |   |         |  |        |         |         |   |        |  |         |        |        |   |         |  |         |         |         |   |         |       |         |         |         |         |   |  |         |         |         |        |   |  |         |         |         |         |   |  |         |         |         |         |   |                                                                                                                                                                                                                                                                                                                                                                                                                                                                                                                                                                                                                                                                                                                                                                                                                                                                                                                                                                                                                                                                                                                                                                                                                                                                                                                                                                                                                                                                                                                                                                                                                                                                                                                                                                                                                                                                                                                                                                                                                                                                                                                                                                                                                                                                                                                                                                                                           |  |  |  |  |  |           |  |  |  |  |                 |       |       |       |       |       |             |  |  |  |  |  |              |  |  |  |  |  |              |  |  |  |  |  |       |   |         |         |         |         |  |   |         |         |         |         |  |   |         |         |         |         |  |   |         |         |         |         |       |         |   |         |         |         |  |         |   |         |         |         |  |         |   |         |         |         |  |         |   |         |         |         |       |         |         |   |         |        |  |         |         |   |         |         |  |         |         |   |         |         |  |         |         |   |        |         |       |         |         |         |   |         |  |         |         |         |   |         |  |         |        |         |   |         |  |         |         |         |   |         |       |         |         |         |         |   |  |         |         |         |         |   |  |         |         |         |         |   |  |         |         |         |        |   |
|                                                                                                                                                                                                                                                                                                                                                                                                                                                                                                                                                                                                                                                                                                                                                                                                                                                                                                                                                                                                                                                                                                                                                                                                                                                                                                                                                                                                                                                                                                                                                                                                                                                                                                                                                                                                                                                                                                                                                                                                                                                                                                                                                                                                                                                                                                                                                                                                          | 16.8027 | 0             | 17.5498 | 15.4775 | 17.5498 |                                                                  |  |               |       |   |                 |                                                                  |       |           |       |       |             |       |   |           |       |   |              |                                                                                                                                                                                                                                                                                                                                                                                          |  |  |  |  |              |       |  |               |       |   |           |       |         |           |         |        |           |       |         |           |         |         |           |                                                                                                                                                                                                                                                                                                                                                                                          |         |         |         |         |  |       |         |               |         |         |           |        |   |           |         |         |           |         |   |           |         |         |           |         |   |         |         |         |  |         |   |         |         |         |       |         |         |   |         |         |  |         |         |   |         |         |  |        |         |   |         |         |  |         |         |   |         |         |       |         |         |         |   |         |  |         |         |         |   |         |  |         |         |         |   |         |  |         |        |         |   |         |       |         |        |         |         |   |  |         |         |         |         |   |  |         |         |         |         |   |  |         |         |         |         |   |                                                                                                                                                                                                                                                                                                                                                                                                                                                                                                                                                                                                                                                                                                                                                                                                                                                                                                                                                                                                                                                                                                                                                                                                                                                                                                                                                                                                                                                                                                                                                                                                                                                                                                                                                                                                                                                                                                                                                                                                                                                                                                                                                                                                                                                                                                                                                                                                     |  |  |  |  |  |           |  |  |  |  |                 |       |       |       |       |       |             |  |  |  |  |  |              |  |  |  |  |  |              |  |  |  |  |  |       |   |         |         |         |         |  |   |         |         |        |         |  |   |         |         |         |         |  |   |        |         |         |         |       |         |   |         |         |         |  |         |   |        |         |         |  |         |   |         |         |         |  |         |   |         |         |         |       |         |         |   |         |         |  |         |        |   |         |         |  |         |        |   |         |         |  |         |         |   |         |         |       |         |         |         |   |         |  |        |         |         |   |        |  |         |        |        |   |         |  |         |         |         |   |         |       |         |         |         |         |   |  |         |         |         |        |   |  |         |         |         |         |   |  |         |         |         |         |   |                                                                                                                                                                                                                                                                                                                                                                                                                                                                                                                                                                                                                                                                                                                                                                                                                                                                                                                                                                                                                                                                                                                                                                                                                                                                                                                                                                                                                                                                                                                                                                                                                                                                                                                                                                                                                                                                                                                                                                                                                                                                                                                                                                                                                                                                                                                                                                                                           |  |  |  |  |  |           |  |  |  |  |                 |       |       |       |       |       |             |  |  |  |  |  |              |  |  |  |  |  |              |  |  |  |  |  |       |   |         |         |         |         |  |   |         |         |         |         |  |   |         |         |         |         |  |   |         |         |         |         |       |         |   |         |         |         |  |         |   |         |         |         |  |         |   |         |         |         |  |         |   |         |         |         |       |         |         |   |         |        |  |         |         |   |         |         |  |         |         |   |         |         |  |         |         |   |        |         |       |         |         |         |   |         |  |         |         |         |   |         |  |         |        |         |   |         |  |         |         |         |   |         |       |         |         |         |         |   |  |         |         |         |         |   |  |         |         |         |         |   |  |         |         |         |        |   |
|                                                                                                                                                                                                                                                                                                                                                                                                                                                                                                                                                                                                                                                                                                                                                                                                                                                                                                                                                                                                                                                                                                                                                                                                                                                                                                                                                                                                                                                                                                                                                                                                                                                                                                                                                                                                                                                                                                                                                                                                                                                                                                                                                                                                                                                                                                                                                                                                          | -164.83 | 0             | -288.54 | 230.745 | 36.0933 |                                                                  |  |               |       |   |                 |                                                                  |       |           |       |       |             |       |   |           |       |   |              |                                                                                                                                                                                                                                                                                                                                                                                          |  |  |  |  |              |       |  |               |       |   |           |       |         |           |         |        |           |       |         |           |         |         |           |                                                                                                                                                                                                                                                                                                                                                                                          |         |         |         |         |  |       |         |               |         |         |           |        |   |           |         |         |           |         |   |           |         |         |           |         |   |         |         |         |  |         |   |         |         |         |       |         |         |   |         |         |  |         |         |   |         |         |  |        |         |   |         |         |  |         |         |   |         |         |       |         |         |         |   |         |  |         |         |         |   |         |  |         |         |         |   |         |  |         |        |         |   |         |       |         |        |         |         |   |  |         |         |         |         |   |  |         |         |         |         |   |  |         |         |         |         |   |                                                                                                                                                                                                                                                                                                                                                                                                                                                                                                                                                                                                                                                                                                                                                                                                                                                                                                                                                                                                                                                                                                                                                                                                                                                                                                                                                                                                                                                                                                                                                                                                                                                                                                                                                                                                                                                                                                                                                                                                                                                                                                                                                                                                                                                                                                                                                                                                     |  |  |  |  |  |           |  |  |  |  |                 |       |       |       |       |       |             |  |  |  |  |  |              |  |  |  |  |  |              |  |  |  |  |  |       |   |         |         |         |         |  |   |         |         |        |         |  |   |         |         |         |         |  |   |        |         |         |         |       |         |   |         |         |         |  |         |   |        |         |         |  |         |   |         |         |         |  |         |   |         |         |         |       |         |         |   |         |         |  |         |        |   |         |         |  |         |        |   |         |         |  |         |         |   |         |         |       |         |         |         |   |         |  |        |         |         |   |        |  |         |        |        |   |         |  |         |         |         |   |         |       |         |         |         |         |   |  |         |         |         |        |   |  |         |         |         |         |   |  |         |         |         |         |   |                                                                                                                                                                                                                                                                                                                                                                                                                                                                                                                                                                                                                                                                                                                                                                                                                                                                                                                                                                                                                                                                                                                                                                                                                                                                                                                                                                                                                                                                                                                                                                                                                                                                                                                                                                                                                                                                                                                                                                                                                                                                                                                                                                                                                                                                                                                                                                                                           |  |  |  |  |  |           |  |  |  |  |                 |       |       |       |       |       |             |  |  |  |  |  |              |  |  |  |  |  |              |  |  |  |  |  |       |   |         |         |         |         |  |   |         |         |         |         |  |   |         |         |         |         |  |   |         |         |         |         |       |         |   |         |         |         |  |         |   |         |         |         |  |         |   |         |         |         |  |         |   |         |         |         |       |         |         |   |         |        |  |         |         |   |         |         |  |         |         |   |         |         |  |         |         |   |        |         |       |         |         |         |   |         |  |         |         |         |   |         |  |         |        |         |   |         |  |         |         |         |   |         |       |         |         |         |         |   |  |         |         |         |         |   |  |         |         |         |         |   |  |         |         |         |        |   |
|                                                                                                                                                                                                                                                                                                                                                                                                                                                                                                                                                                                                                                                                                                                                                                                                                                                                                                                                                                                                                                                                                                                                                                                                                                                                                                                                                                                                                                                                                                                                                                                                                                                                                                                                                                                                                                                                                                                                                                                                                                                                                                                                                                                                                                                                                                                                                                                                          | -95.622 | 0             | -216.25 | 294.498 | 108.382 |                                                                  |  |               |       |   |                 |                                                                  |       |           |       |       |             |       |   |           |       |   |              |                                                                                                                                                                                                                                                                                                                                                                                          |  |  |  |  |              |       |  |               |       |   |           |       |         |           |         |        |           |       |         |           |         |         |           |                                                                                                                                                                                                                                                                                                                                                                                          |         |         |         |         |  |       |         |               |         |         |           |        |   |           |         |         |           |         |   |           |         |         |           |         |   |         |         |         |  |         |   |         |         |         |       |         |         |   |         |         |  |         |         |   |         |         |  |        |         |   |         |         |  |         |         |   |         |         |       |         |         |         |   |         |  |         |         |         |   |         |  |         |         |         |   |         |  |         |        |         |   |         |       |         |        |         |         |   |  |         |         |         |         |   |  |         |         |         |         |   |  |         |         |         |         |   |                                                                                                                                                                                                                                                                                                                                                                                                                                                                                                                                                                                                                                                                                                                                                                                                                                                                                                                                                                                                                                                                                                                                                                                                                                                                                                                                                                                                                                                                                                                                                                                                                                                                                                                                                                                                                                                                                                                                                                                                                                                                                                                                                                                                                                                                                                                                                                                                     |  |  |  |  |  |           |  |  |  |  |                 |       |       |       |       |       |             |  |  |  |  |  |              |  |  |  |  |  |              |  |  |  |  |  |       |   |         |         |         |         |  |   |         |         |        |         |  |   |         |         |         |         |  |   |        |         |         |         |       |         |   |         |         |         |  |         |   |        |         |         |  |         |   |         |         |         |  |         |   |         |         |         |       |         |         |   |         |         |  |         |        |   |         |         |  |         |        |   |         |         |  |         |         |   |         |         |       |         |         |         |   |         |  |        |         |         |   |        |  |         |        |        |   |         |  |         |         |         |   |         |       |         |         |         |         |   |  |         |         |         |        |   |  |         |         |         |         |   |  |         |         |         |         |   |                                                                                                                                                                                                                                                                                                                                                                                                                                                                                                                                                                                                                                                                                                                                                                                                                                                                                                                                                                                                                                                                                                                                                                                                                                                                                                                                                                                                                                                                                                                                                                                                                                                                                                                                                                                                                                                                                                                                                                                                                                                                                                                                                                                                                                                                                                                                                                                                           |  |  |  |  |  |           |  |  |  |  |                 |       |       |       |       |       |             |  |  |  |  |  |              |  |  |  |  |  |              |  |  |  |  |  |       |   |         |         |         |         |  |   |         |         |         |         |  |   |         |         |         |         |  |   |         |         |         |         |       |         |   |         |         |         |  |         |   |         |         |         |  |         |   |         |         |         |  |         |   |         |         |         |       |         |         |   |         |        |  |         |         |   |         |         |  |         |         |   |         |         |  |         |         |   |        |         |       |         |         |         |   |         |  |         |         |         |   |         |  |         |        |         |   |         |  |         |         |         |   |         |       |         |         |         |         |   |  |         |         |         |         |   |  |         |         |         |         |   |  |         |         |         |        |   |
| Dc FI                                                                                                                                                                                                                                                                                                                                                                                                                                                                                                                                                                                                                                                                                                                                                                                                                                                                                                                                                                                                                                                                                                                                                                                                                                                                                                                                                                                                                                                                                                                                                                                                                                                                                                                                                                                                                                                                                                                                                                                                                                                                                                                                                                                                                                                                                                                                                                                                    | 122.165 | 252.392       | 0       | 515.014 | 324.63  |                                                                  |  |               |       |   |                 |                                                                  |       |           |       |       |             |       |   |           |       |   |              |                                                                                                                                                                                                                                                                                                                                                                                          |  |  |  |  |              |       |  |               |       |   |           |       |         |           |         |        |           |       |         |           |         |         |           |                                                                                                                                                                                                                                                                                                                                                                                          |         |         |         |         |  |       |         |               |         |         |           |        |   |           |         |         |           |         |   |           |         |         |           |         |   |         |         |         |  |         |   |         |         |         |       |         |         |   |         |         |  |         |         |   |         |         |  |        |         |   |         |         |  |         |         |   |         |         |       |         |         |         |   |         |  |         |         |         |   |         |  |         |         |         |   |         |  |         |        |         |   |         |       |         |        |         |         |   |  |         |         |         |         |   |  |         |         |         |         |   |  |         |         |         |         |   |                                                                                                                                                                                                                                                                                                                                                                                                                                                                                                                                                                                                                                                                                                                                                                                                                                                                                                                                                                                                                                                                                                                                                                                                                                                                                                                                                                                                                                                                                                                                                                                                                                                                                                                                                                                                                                                                                                                                                                                                                                                                                                                                                                                                                                                                                                                                                                                                     |  |  |  |  |  |           |  |  |  |  |                 |       |       |       |       |       |             |  |  |  |  |  |              |  |  |  |  |  |              |  |  |  |  |  |       |   |         |         |         |         |  |   |         |         |        |         |  |   |         |         |         |         |  |   |        |         |         |         |       |         |   |         |         |         |  |         |   |        |         |         |  |         |   |         |         |         |  |         |   |         |         |         |       |         |         |   |         |         |  |         |        |   |         |         |  |         |        |   |         |         |  |         |         |   |         |         |       |         |         |         |   |         |  |        |         |         |   |        |  |         |        |        |   |         |  |         |         |         |   |         |       |         |         |         |         |   |  |         |         |         |        |   |  |         |         |         |         |   |  |         |         |         |         |   |                                                                                                                                                                                                                                                                                                                                                                                                                                                                                                                                                                                                                                                                                                                                                                                                                                                                                                                                                                                                                                                                                                                                                                                                                                                                                                                                                                                                                                                                                                                                                                                                                                                                                                                                                                                                                                                                                                                                                                                                                                                                                                                                                                                                                                                                                                                                                                                                           |  |  |  |  |  |           |  |  |  |  |                 |       |       |       |       |       |             |  |  |  |  |  |              |  |  |  |  |  |              |  |  |  |  |  |       |   |         |         |         |         |  |   |         |         |         |         |  |   |         |         |         |         |  |   |         |         |         |         |       |         |   |         |         |         |  |         |   |         |         |         |  |         |   |         |         |         |  |         |   |         |         |         |       |         |         |   |         |        |  |         |         |   |         |         |  |         |         |   |         |         |  |         |         |   |        |         |       |         |         |         |   |         |  |         |         |         |   |         |  |         |        |         |   |         |  |         |         |         |   |         |       |         |         |         |         |   |  |         |         |         |         |   |  |         |         |         |         |   |  |         |         |         |        |   |
|                                                                                                                                                                                                                                                                                                                                                                                                                                                                                                                                                                                                                                                                                                                                                                                                                                                                                                                                                                                                                                                                                                                                                                                                                                                                                                                                                                                                                                                                                                                                                                                                                                                                                                                                                                                                                                                                                                                                                                                                                                                                                                                                                                                                                                                                                                                                                                                                          | 16.8027 | 17.5498       | 0       | 15.4775 | 17.5498 |                                                                  |  |               |       |   |                 |                                                                  |       |           |       |       |             |       |   |           |       |   |              |                                                                                                                                                                                                                                                                                                                                                                                          |  |  |  |  |              |       |  |               |       |   |           |       |         |           |         |        |           |       |         |           |         |         |           |                                                                                                                                                                                                                                                                                                                                                                                          |         |         |         |         |  |       |         |               |         |         |           |        |   |           |         |         |           |         |   |           |         |         |           |         |   |         |         |         |  |         |   |         |         |         |       |         |         |   |         |         |  |         |         |   |         |         |  |        |         |   |         |         |  |         |         |   |         |         |       |         |         |         |   |         |  |         |         |         |   |         |  |         |         |         |   |         |  |         |        |         |   |         |       |         |        |         |         |   |  |         |         |         |         |   |  |         |         |         |         |   |  |         |         |         |         |   |                                                                                                                                                                                                                                                                                                                                                                                                                                                                                                                                                                                                                                                                                                                                                                                                                                                                                                                                                                                                                                                                                                                                                                                                                                                                                                                                                                                                                                                                                                                                                                                                                                                                                                                                                                                                                                                                                                                                                                                                                                                                                                                                                                                                                                                                                                                                                                                                     |  |  |  |  |  |           |  |  |  |  |                 |       |       |       |       |       |             |  |  |  |  |  |              |  |  |  |  |  |              |  |  |  |  |  |       |   |         |         |         |         |  |   |         |         |        |         |  |   |         |         |         |         |  |   |        |         |         |         |       |         |   |         |         |         |  |         |   |        |         |         |  |         |   |         |         |         |  |         |   |         |         |         |       |         |         |   |         |         |  |         |        |   |         |         |  |         |        |   |         |         |  |         |         |   |         |         |       |         |         |         |   |         |  |        |         |         |   |        |  |         |        |        |   |         |  |         |         |         |   |         |       |         |         |         |         |   |  |         |         |         |        |   |  |         |         |         |         |   |  |         |         |         |         |   |                                                                                                                                                                                                                                                                                                                                                                                                                                                                                                                                                                                                                                                                                                                                                                                                                                                                                                                                                                                                                                                                                                                                                                                                                                                                                                                                                                                                                                                                                                                                                                                                                                                                                                                                                                                                                                                                                                                                                                                                                                                                                                                                                                                                                                                                                                                                                                                                           |  |  |  |  |  |           |  |  |  |  |                 |       |       |       |       |       |             |  |  |  |  |  |              |  |  |  |  |  |              |  |  |  |  |  |       |   |         |         |         |         |  |   |         |         |         |         |  |   |         |         |         |         |  |   |         |         |         |         |       |         |   |         |         |         |  |         |   |         |         |         |  |         |   |         |         |         |  |         |   |         |         |         |       |         |         |   |         |        |  |         |         |   |         |         |  |         |         |   |         |         |  |         |         |   |        |         |       |         |         |         |   |         |  |         |         |         |   |         |  |         |        |         |   |         |  |         |         |         |   |         |       |         |         |         |         |   |  |         |         |         |         |   |  |         |         |         |         |   |  |         |         |         |        |   |
|                                                                                                                                                                                                                                                                                                                                                                                                                                                                                                                                                                                                                                                                                                                                                                                                                                                                                                                                                                                                                                                                                                                                                                                                                                                                                                                                                                                                                                                                                                                                                                                                                                                                                                                                                                                                                                                                                                                                                                                                                                                                                                                                                                                                                                                                                                                                                                                                          | 87.5593 | 216.248       | 0       | 483.137 | 288.486 |                                                                  |  |               |       |   |                 |                                                                  |       |           |       |       |             |       |   |           |       |   |              |                                                                                                                                                                                                                                                                                                                                                                                          |  |  |  |  |              |       |  |               |       |   |           |       |         |           |         |        |           |       |         |           |         |         |           |                                                                                                                                                                                                                                                                                                                                                                                          |         |         |         |         |  |       |         |               |         |         |           |        |   |           |         |         |           |         |   |           |         |         |           |         |   |         |         |         |  |         |   |         |         |         |       |         |         |   |         |         |  |         |         |   |         |         |  |        |         |   |         |         |  |         |         |   |         |         |       |         |         |         |   |         |  |         |         |         |   |         |  |         |         |         |   |         |  |         |        |         |   |         |       |         |        |         |         |   |  |         |         |         |         |   |  |         |         |         |         |   |  |         |         |         |         |   |                                                                                                                                                                                                                                                                                                                                                                                                                                                                                                                                                                                                                                                                                                                                                                                                                                                                                                                                                                                                                                                                                                                                                                                                                                                                                                                                                                                                                                                                                                                                                                                                                                                                                                                                                                                                                                                                                                                                                                                                                                                                                                                                                                                                                                                                                                                                                                                                     |  |  |  |  |  |           |  |  |  |  |                 |       |       |       |       |       |             |  |  |  |  |  |              |  |  |  |  |  |              |  |  |  |  |  |       |   |         |         |         |         |  |   |         |         |        |         |  |   |         |         |         |         |  |   |        |         |         |         |       |         |   |         |         |         |  |         |   |        |         |         |  |         |   |         |         |         |  |         |   |         |         |         |       |         |         |   |         |         |  |         |        |   |         |         |  |         |        |   |         |         |  |         |         |   |         |         |       |         |         |         |   |         |  |        |         |         |   |        |  |         |        |        |   |         |  |         |         |         |   |         |       |         |         |         |         |   |  |         |         |         |        |   |  |         |         |         |         |   |  |         |         |         |         |   |                                                                                                                                                                                                                                                                                                                                                                                                                                                                                                                                                                                                                                                                                                                                                                                                                                                                                                                                                                                                                                                                                                                                                                                                                                                                                                                                                                                                                                                                                                                                                                                                                                                                                                                                                                                                                                                                                                                                                                                                                                                                                                                                                                                                                                                                                                                                                                                                           |  |  |  |  |  |           |  |  |  |  |                 |       |       |       |       |       |             |  |  |  |  |  |              |  |  |  |  |  |              |  |  |  |  |  |       |   |         |         |         |         |  |   |         |         |         |         |  |   |         |         |         |         |  |   |         |         |         |         |       |         |   |         |         |         |  |         |   |         |         |         |  |         |   |         |         |         |  |         |   |         |         |         |       |         |         |   |         |        |  |         |         |   |         |         |  |         |         |   |         |         |  |         |         |   |        |         |       |         |         |         |   |         |  |         |         |         |   |         |  |         |        |         |   |         |  |         |         |         |   |         |       |         |         |         |         |   |  |         |         |         |         |   |  |         |         |         |         |   |  |         |         |         |        |   |
|                                                                                                                                                                                                                                                                                                                                                                                                                                                                                                                                                                                                                                                                                                                                                                                                                                                                                                                                                                                                                                                                                                                                                                                                                                                                                                                                                                                                                                                                                                                                                                                                                                                                                                                                                                                                                                                                                                                                                                                                                                                                                                                                                                                                                                                                                                                                                                                                          | 156.771 | 288.537       | 0       | 546.89  | 360.775 |                                                                  |  |               |       |   |                 |                                                                  |       |           |       |       |             |       |   |           |       |   |              |                                                                                                                                                                                                                                                                                                                                                                                          |  |  |  |  |              |       |  |               |       |   |           |       |         |           |         |        |           |       |         |           |         |         |           |                                                                                                                                                                                                                                                                                                                                                                                          |         |         |         |         |  |       |         |               |         |         |           |        |   |           |         |         |           |         |   |           |         |         |           |         |   |         |         |         |  |         |   |         |         |         |       |         |         |   |         |         |  |         |         |   |         |         |  |        |         |   |         |         |  |         |         |   |         |         |       |         |         |         |   |         |  |         |         |         |   |         |  |         |         |         |   |         |  |         |        |         |   |         |       |         |        |         |         |   |  |         |         |         |         |   |  |         |         |         |         |   |  |         |         |         |         |   |                                                                                                                                                                                                                                                                                                                                                                                                                                                                                                                                                                                                                                                                                                                                                                                                                                                                                                                                                                                                                                                                                                                                                                                                                                                                                                                                                                                                                                                                                                                                                                                                                                                                                                                                                                                                                                                                                                                                                                                                                                                                                                                                                                                                                                                                                                                                                                                                     |  |  |  |  |  |           |  |  |  |  |                 |       |       |       |       |       |             |  |  |  |  |  |              |  |  |  |  |  |              |  |  |  |  |  |       |   |         |         |         |         |  |   |         |         |        |         |  |   |         |         |         |         |  |   |        |         |         |         |       |         |   |         |         |         |  |         |   |        |         |         |  |         |   |         |         |         |  |         |   |         |         |         |       |         |         |   |         |         |  |         |        |   |         |         |  |         |        |   |         |         |  |         |         |   |         |         |       |         |         |         |   |         |  |        |         |         |   |        |  |         |        |        |   |         |  |         |         |         |   |         |       |         |         |         |         |   |  |         |         |         |        |   |  |         |         |         |         |   |  |         |         |         |         |   |                                                                                                                                                                                                                                                                                                                                                                                                                                                                                                                                                                                                                                                                                                                                                                                                                                                                                                                                                                                                                                                                                                                                                                                                                                                                                                                                                                                                                                                                                                                                                                                                                                                                                                                                                                                                                                                                                                                                                                                                                                                                                                                                                                                                                                                                                                                                                                                                           |  |  |  |  |  |           |  |  |  |  |                 |       |       |       |       |       |             |  |  |  |  |  |              |  |  |  |  |  |              |  |  |  |  |  |       |   |         |         |         |         |  |   |         |         |         |         |  |   |         |         |         |         |  |   |         |         |         |         |       |         |   |         |         |         |  |         |   |         |         |         |  |         |   |         |         |         |  |         |   |         |         |         |       |         |         |   |         |        |  |         |         |   |         |         |  |         |         |   |         |         |  |         |         |   |        |         |       |         |         |         |   |         |  |         |         |         |   |         |  |         |        |         |   |         |  |         |         |         |   |         |       |         |         |         |         |   |  |         |         |         |         |   |  |         |         |         |         |   |  |         |         |         |        |   |
| Sc Aq                                                                                                                                                                                                                                                                                                                                                                                                                                                                                                                                                                                                                                                                                                                                                                                                                                                                                                                                                                                                                                                                                                                                                                                                                                                                                                                                                                                                                                                                                                                                                                                                                                                                                                                                                                                                                                                                                                                                                                                                                                                                                                                                                                                                                                                                                                                                                                                                    | -392.85 | -262.62       | -515.01 | 0       | -190.38 |                                                                  |  |               |       |   |                 |                                                                  |       |           |       |       |             |       |   |           |       |   |              |                                                                                                                                                                                                                                                                                                                                                                                          |  |  |  |  |              |       |  |               |       |   |           |       |         |           |         |        |           |       |         |           |         |         |           |                                                                                                                                                                                                                                                                                                                                                                                          |         |         |         |         |  |       |         |               |         |         |           |        |   |           |         |         |           |         |   |           |         |         |           |         |   |         |         |         |  |         |   |         |         |         |       |         |         |   |         |         |  |         |         |   |         |         |  |        |         |   |         |         |  |         |         |   |         |         |       |         |         |         |   |         |  |         |         |         |   |         |  |         |         |         |   |         |  |         |        |         |   |         |       |         |        |         |         |   |  |         |         |         |         |   |  |         |         |         |         |   |  |         |         |         |         |   |                                                                                                                                                                                                                                                                                                                                                                                                                                                                                                                                                                                                                                                                                                                                                                                                                                                                                                                                                                                                                                                                                                                                                                                                                                                                                                                                                                                                                                                                                                                                                                                                                                                                                                                                                                                                                                                                                                                                                                                                                                                                                                                                                                                                                                                                                                                                                                                                     |  |  |  |  |  |           |  |  |  |  |                 |       |       |       |       |       |             |  |  |  |  |  |              |  |  |  |  |  |              |  |  |  |  |  |       |   |         |         |         |         |  |   |         |         |        |         |  |   |         |         |         |         |  |   |        |         |         |         |       |         |   |         |         |         |  |         |   |        |         |         |  |         |   |         |         |         |  |         |   |         |         |         |       |         |         |   |         |         |  |         |        |   |         |         |  |         |        |   |         |         |  |         |         |   |         |         |       |         |         |         |   |         |  |        |         |         |   |        |  |         |        |        |   |         |  |         |         |         |   |         |       |         |         |         |         |   |  |         |         |         |        |   |  |         |         |         |         |   |  |         |         |         |         |   |                                                                                                                                                                                                                                                                                                                                                                                                                                                                                                                                                                                                                                                                                                                                                                                                                                                                                                                                                                                                                                                                                                                                                                                                                                                                                                                                                                                                                                                                                                                                                                                                                                                                                                                                                                                                                                                                                                                                                                                                                                                                                                                                                                                                                                                                                                                                                                                                           |  |  |  |  |  |           |  |  |  |  |                 |       |       |       |       |       |             |  |  |  |  |  |              |  |  |  |  |  |              |  |  |  |  |  |       |   |         |         |         |         |  |   |         |         |         |         |  |   |         |         |         |         |  |   |         |         |         |         |       |         |   |         |         |         |  |         |   |         |         |         |  |         |   |         |         |         |  |         |   |         |         |         |       |         |         |   |         |        |  |         |         |   |         |         |  |         |         |   |         |         |  |         |         |   |        |         |       |         |         |         |   |         |  |         |         |         |   |         |  |         |        |         |   |         |  |         |         |         |   |         |       |         |         |         |         |   |  |         |         |         |         |   |  |         |         |         |         |   |  |         |         |         |        |   |
|                                                                                                                                                                                                                                                                                                                                                                                                                                                                                                                                                                                                                                                                                                                                                                                                                                                                                                                                                                                                                                                                                                                                                                                                                                                                                                                                                                                                                                                                                                                                                                                                                                                                                                                                                                                                                                                                                                                                                                                                                                                                                                                                                                                                                                                                                                                                                                                                          | 14.6248 | 15.4775       | 15.4775 | 0       | 15.4775 |                                                                  |  |               |       |   |                 |                                                                  |       |           |       |       |             |       |   |           |       |   |              |                                                                                                                                                                                                                                                                                                                                                                                          |  |  |  |  |              |       |  |               |       |   |           |       |         |           |         |        |           |       |         |           |         |         |           |                                                                                                                                                                                                                                                                                                                                                                                          |         |         |         |         |  |       |         |               |         |         |           |        |   |           |         |         |           |         |   |           |         |         |           |         |   |         |         |         |  |         |   |         |         |         |       |         |         |   |         |         |  |         |         |   |         |         |  |        |         |   |         |         |  |         |         |   |         |         |       |         |         |         |   |         |  |         |         |         |   |         |  |         |         |         |   |         |  |         |        |         |   |         |       |         |        |         |         |   |  |         |         |         |         |   |  |         |         |         |         |   |  |         |         |         |         |   |                                                                                                                                                                                                                                                                                                                                                                                                                                                                                                                                                                                                                                                                                                                                                                                                                                                                                                                                                                                                                                                                                                                                                                                                                                                                                                                                                                                                                                                                                                                                                                                                                                                                                                                                                                                                                                                                                                                                                                                                                                                                                                                                                                                                                                                                                                                                                                                                     |  |  |  |  |  |           |  |  |  |  |                 |       |       |       |       |       |             |  |  |  |  |  |              |  |  |  |  |  |              |  |  |  |  |  |       |   |         |         |         |         |  |   |         |         |        |         |  |   |         |         |         |         |  |   |        |         |         |         |       |         |   |         |         |         |  |         |   |        |         |         |  |         |   |         |         |         |  |         |   |         |         |         |       |         |         |   |         |         |  |         |        |   |         |         |  |         |        |   |         |         |  |         |         |   |         |         |       |         |         |         |   |         |  |        |         |         |   |        |  |         |        |        |   |         |  |         |         |         |   |         |       |         |         |         |         |   |  |         |         |         |        |   |  |         |         |         |         |   |  |         |         |         |         |   |                                                                                                                                                                                                                                                                                                                                                                                                                                                                                                                                                                                                                                                                                                                                                                                                                                                                                                                                                                                                                                                                                                                                                                                                                                                                                                                                                                                                                                                                                                                                                                                                                                                                                                                                                                                                                                                                                                                                                                                                                                                                                                                                                                                                                                                                                                                                                                                                           |  |  |  |  |  |           |  |  |  |  |                 |       |       |       |       |       |             |  |  |  |  |  |              |  |  |  |  |  |              |  |  |  |  |  |       |   |         |         |         |         |  |   |         |         |         |         |  |   |         |         |         |         |  |   |         |         |         |         |       |         |   |         |         |         |  |         |   |         |         |         |  |         |   |         |         |         |  |         |   |         |         |         |       |         |         |   |         |        |  |         |         |   |         |         |  |         |         |   |         |         |  |         |         |   |        |         |       |         |         |         |   |         |  |         |         |         |   |         |  |         |        |         |   |         |  |         |         |         |   |         |       |         |         |         |         |   |  |         |         |         |         |   |  |         |         |         |         |   |  |         |         |         |        |   |
|                                                                                                                                                                                                                                                                                                                                                                                                                                                                                                                                                                                                                                                                                                                                                                                                                                                                                                                                                                                                                                                                                                                                                                                                                                                                                                                                                                                                                                                                                                                                                                                                                                                                                                                                                                                                                                                                                                                                                                                                                                                                                                                                                                                                                                                                                                                                                                                                          | -422.97 | -294.5        | -546.89 | 0       | -222.26 |                                                                  |  |               |       |   |                 |                                                                  |       |           |       |       |             |       |   |           |       |   |              |                                                                                                                                                                                                                                                                                                                                                                                          |  |  |  |  |              |       |  |               |       |   |           |       |         |           |         |        |           |       |         |           |         |         |           |                                                                                                                                                                                                                                                                                                                                                                                          |         |         |         |         |  |       |         |               |         |         |           |        |   |           |         |         |           |         |   |           |         |         |           |         |   |         |         |         |  |         |   |         |         |         |       |         |         |   |         |         |  |         |         |   |         |         |  |        |         |   |         |         |  |         |         |   |         |         |       |         |         |         |   |         |  |         |         |         |   |         |  |         |         |         |   |         |  |         |        |         |   |         |       |         |        |         |         |   |  |         |         |         |         |   |  |         |         |         |         |   |  |         |         |         |         |   |                                                                                                                                                                                                                                                                                                                                                                                                                                                                                                                                                                                                                                                                                                                                                                                                                                                                                                                                                                                                                                                                                                                                                                                                                                                                                                                                                                                                                                                                                                                                                                                                                                                                                                                                                                                                                                                                                                                                                                                                                                                                                                                                                                                                                                                                                                                                                                                                     |  |  |  |  |  |           |  |  |  |  |                 |       |       |       |       |       |             |  |  |  |  |  |              |  |  |  |  |  |              |  |  |  |  |  |       |   |         |         |         |         |  |   |         |         |        |         |  |   |         |         |         |         |  |   |        |         |         |         |       |         |   |         |         |         |  |         |   |        |         |         |  |         |   |         |         |         |  |         |   |         |         |         |       |         |         |   |         |         |  |         |        |   |         |         |  |         |        |   |         |         |  |         |         |   |         |         |       |         |         |         |   |         |  |        |         |         |   |        |  |         |        |        |   |         |  |         |         |         |   |         |       |         |         |         |         |   |  |         |         |         |        |   |  |         |         |         |         |   |  |         |         |         |         |   |                                                                                                                                                                                                                                                                                                                                                                                                                                                                                                                                                                                                                                                                                                                                                                                                                                                                                                                                                                                                                                                                                                                                                                                                                                                                                                                                                                                                                                                                                                                                                                                                                                                                                                                                                                                                                                                                                                                                                                                                                                                                                                                                                                                                                                                                                                                                                                                                           |  |  |  |  |  |           |  |  |  |  |                 |       |       |       |       |       |             |  |  |  |  |  |              |  |  |  |  |  |              |  |  |  |  |  |       |   |         |         |         |         |  |   |         |         |         |         |  |   |         |         |         |         |  |   |         |         |         |         |       |         |   |         |         |         |  |         |   |         |         |         |  |         |   |         |         |         |  |         |   |         |         |         |       |         |         |   |         |        |  |         |         |   |         |         |  |         |         |   |         |         |  |         |         |   |        |         |       |         |         |         |   |         |  |         |         |         |   |         |  |         |        |         |   |         |  |         |         |         |   |         |       |         |         |         |         |   |  |         |         |         |         |   |  |         |         |         |         |   |  |         |         |         |        |   |
|                                                                                                                                                                                                                                                                                                                                                                                                                                                                                                                                                                                                                                                                                                                                                                                                                                                                                                                                                                                                                                                                                                                                                                                                                                                                                                                                                                                                                                                                                                                                                                                                                                                                                                                                                                                                                                                                                                                                                                                                                                                                                                                                                                                                                                                                                                                                                                                                          | -362.73 | -230.74       | -483.14 | 0       | -158.51 |                                                                  |  |               |       |   |                 |                                                                  |       |           |       |       |             |       |   |           |       |   |              |                                                                                                                                                                                                                                                                                                                                                                                          |  |  |  |  |              |       |  |               |       |   |           |       |         |           |         |        |           |       |         |           |         |         |           |                                                                                                                                                                                                                                                                                                                                                                                          |         |         |         |         |  |       |         |               |         |         |           |        |   |           |         |         |           |         |   |           |         |         |           |         |   |         |         |         |  |         |   |         |         |         |       |         |         |   |         |         |  |         |         |   |         |         |  |        |         |   |         |         |  |         |         |   |         |         |       |         |         |         |   |         |  |         |         |         |   |         |  |         |         |         |   |         |  |         |        |         |   |         |       |         |        |         |         |   |  |         |         |         |         |   |  |         |         |         |         |   |  |         |         |         |         |   |                                                                                                                                                                                                                                                                                                                                                                                                                                                                                                                                                                                                                                                                                                                                                                                                                                                                                                                                                                                                                                                                                                                                                                                                                                                                                                                                                                                                                                                                                                                                                                                                                                                                                                                                                                                                                                                                                                                                                                                                                                                                                                                                                                                                                                                                                                                                                                                                     |  |  |  |  |  |           |  |  |  |  |                 |       |       |       |       |       |             |  |  |  |  |  |              |  |  |  |  |  |              |  |  |  |  |  |       |   |         |         |         |         |  |   |         |         |        |         |  |   |         |         |         |         |  |   |        |         |         |         |       |         |   |         |         |         |  |         |   |        |         |         |  |         |   |         |         |         |  |         |   |         |         |         |       |         |         |   |         |         |  |         |        |   |         |         |  |         |        |   |         |         |  |         |         |   |         |         |       |         |         |         |   |         |  |        |         |         |   |        |  |         |        |        |   |         |  |         |         |         |   |         |       |         |         |         |         |   |  |         |         |         |        |   |  |         |         |         |         |   |  |         |         |         |         |   |                                                                                                                                                                                                                                                                                                                                                                                                                                                                                                                                                                                                                                                                                                                                                                                                                                                                                                                                                                                                                                                                                                                                                                                                                                                                                                                                                                                                                                                                                                                                                                                                                                                                                                                                                                                                                                                                                                                                                                                                                                                                                                                                                                                                                                                                                                                                                                                                           |  |  |  |  |  |           |  |  |  |  |                 |       |       |       |       |       |             |  |  |  |  |  |              |  |  |  |  |  |              |  |  |  |  |  |       |   |         |         |         |         |  |   |         |         |         |         |  |   |         |         |         |         |  |   |         |         |         |         |       |         |   |         |         |         |  |         |   |         |         |         |  |         |   |         |         |         |  |         |   |         |         |         |       |         |         |   |         |        |  |         |         |   |         |         |  |         |         |   |         |         |  |         |         |   |        |         |       |         |         |         |   |         |  |         |         |         |   |         |  |         |        |         |   |         |  |         |         |         |   |         |       |         |         |         |         |   |  |         |         |         |         |   |  |         |         |         |         |   |  |         |         |         |        |   |
| Sc FI                                                                                                                                                                                                                                                                                                                                                                                                                                                                                                                                                                                                                                                                                                                                                                                                                                                                                                                                                                                                                                                                                                                                                                                                                                                                                                                                                                                                                                                                                                                                                                                                                                                                                                                                                                                                                                                                                                                                                                                                                                                                                                                                                                                                                                                                                                                                                                                                    | -202.47 | -72.238       | -324.63 | 190.384 | 0       |                                                                  |  |               |       |   |                 |                                                                  |       |           |       |       |             |       |   |           |       |   |              |                                                                                                                                                                                                                                                                                                                                                                                          |  |  |  |  |              |       |  |               |       |   |           |       |         |           |         |        |           |       |         |           |         |         |           |                                                                                                                                                                                                                                                                                                                                                                                          |         |         |         |         |  |       |         |               |         |         |           |        |   |           |         |         |           |         |   |           |         |         |           |         |   |         |         |         |  |         |   |         |         |         |       |         |         |   |         |         |  |         |         |   |         |         |  |        |         |   |         |         |  |         |         |   |         |         |       |         |         |         |   |         |  |         |         |         |   |         |  |         |         |         |   |         |  |         |        |         |   |         |       |         |        |         |         |   |  |         |         |         |         |   |  |         |         |         |         |   |  |         |         |         |         |   |                                                                                                                                                                                                                                                                                                                                                                                                                                                                                                                                                                                                                                                                                                                                                                                                                                                                                                                                                                                                                                                                                                                                                                                                                                                                                                                                                                                                                                                                                                                                                                                                                                                                                                                                                                                                                                                                                                                                                                                                                                                                                                                                                                                                                                                                                                                                                                                                     |  |  |  |  |  |           |  |  |  |  |                 |       |       |       |       |       |             |  |  |  |  |  |              |  |  |  |  |  |              |  |  |  |  |  |       |   |         |         |         |         |  |   |         |         |        |         |  |   |         |         |         |         |  |   |        |         |         |         |       |         |   |         |         |         |  |         |   |        |         |         |  |         |   |         |         |         |  |         |   |         |         |         |       |         |         |   |         |         |  |         |        |   |         |         |  |         |        |   |         |         |  |         |         |   |         |         |       |         |         |         |   |         |  |        |         |         |   |        |  |         |        |        |   |         |  |         |         |         |   |         |       |         |         |         |         |   |  |         |         |         |        |   |  |         |         |         |         |   |  |         |         |         |         |   |                                                                                                                                                                                                                                                                                                                                                                                                                                                                                                                                                                                                                                                                                                                                                                                                                                                                                                                                                                                                                                                                                                                                                                                                                                                                                                                                                                                                                                                                                                                                                                                                                                                                                                                                                                                                                                                                                                                                                                                                                                                                                                                                                                                                                                                                                                                                                                                                           |  |  |  |  |  |           |  |  |  |  |                 |       |       |       |       |       |             |  |  |  |  |  |              |  |  |  |  |  |              |  |  |  |  |  |       |   |         |         |         |         |  |   |         |         |         |         |  |   |         |         |         |         |  |   |         |         |         |         |       |         |   |         |         |         |  |         |   |         |         |         |  |         |   |         |         |         |  |         |   |         |         |         |       |         |         |   |         |        |  |         |         |   |         |         |  |         |         |   |         |         |  |         |         |   |        |         |       |         |         |         |   |         |  |         |         |         |   |         |  |         |        |         |   |         |  |         |         |         |   |         |       |         |         |         |         |   |  |         |         |         |         |   |  |         |         |         |         |   |  |         |         |         |        |   |
|                                                                                                                                                                                                                                                                                                                                                                                                                                                                                                                                                                                                                                                                                                                                                                                                                                                                                                                                                                                                                                                                                                                                                                                                                                                                                                                                                                                                                                                                                                                                                                                                                                                                                                                                                                                                                                                                                                                                                                                                                                                                                                                                                                                                                                                                                                                                                                                                          | 16.8027 | 17.5498       | 17.5498 | 15.4775 | 0       |                                                                  |  |               |       |   |                 |                                                                  |       |           |       |       |             |       |   |           |       |   |              |                                                                                                                                                                                                                                                                                                                                                                                          |  |  |  |  |              |       |  |               |       |   |           |       |         |           |         |        |           |       |         |           |         |         |           |                                                                                                                                                                                                                                                                                                                                                                                          |         |         |         |         |  |       |         |               |         |         |           |        |   |           |         |         |           |         |   |           |         |         |           |         |   |         |         |         |  |         |   |         |         |         |       |         |         |   |         |         |  |         |         |   |         |         |  |        |         |   |         |         |  |         |         |   |         |         |       |         |         |         |   |         |  |         |         |         |   |         |  |         |         |         |   |         |  |         |        |         |   |         |       |         |        |         |         |   |  |         |         |         |         |   |  |         |         |         |         |   |  |         |         |         |         |   |                                                                                                                                                                                                                                                                                                                                                                                                                                                                                                                                                                                                                                                                                                                                                                                                                                                                                                                                                                                                                                                                                                                                                                                                                                                                                                                                                                                                                                                                                                                                                                                                                                                                                                                                                                                                                                                                                                                                                                                                                                                                                                                                                                                                                                                                                                                                                                                                     |  |  |  |  |  |           |  |  |  |  |                 |       |       |       |       |       |             |  |  |  |  |  |              |  |  |  |  |  |              |  |  |  |  |  |       |   |         |         |         |         |  |   |         |         |        |         |  |   |         |         |         |         |  |   |        |         |         |         |       |         |   |         |         |         |  |         |   |        |         |         |  |         |   |         |         |         |  |         |   |         |         |         |       |         |         |   |         |         |  |         |        |   |         |         |  |         |        |   |         |         |  |         |         |   |         |         |       |         |         |         |   |         |  |        |         |         |   |        |  |         |        |        |   |         |  |         |         |         |   |         |       |         |         |         |         |   |  |         |         |         |        |   |  |         |         |         |         |   |  |         |         |         |         |   |                                                                                                                                                                                                                                                                                                                                                                                                                                                                                                                                                                                                                                                                                                                                                                                                                                                                                                                                                                                                                                                                                                                                                                                                                                                                                                                                                                                                                                                                                                                                                                                                                                                                                                                                                                                                                                                                                                                                                                                                                                                                                                                                                                                                                                                                                                                                                                                                           |  |  |  |  |  |           |  |  |  |  |                 |       |       |       |       |       |             |  |  |  |  |  |              |  |  |  |  |  |              |  |  |  |  |  |       |   |         |         |         |         |  |   |         |         |         |         |  |   |         |         |         |         |  |   |         |         |         |         |       |         |   |         |         |         |  |         |   |         |         |         |  |         |   |         |         |         |  |         |   |         |         |         |       |         |         |   |         |        |  |         |         |   |         |         |  |         |         |   |         |         |  |         |         |   |        |         |       |         |         |         |   |         |  |         |         |         |   |         |  |         |        |         |   |         |  |         |         |         |   |         |       |         |         |         |         |   |  |         |         |         |         |   |  |         |         |         |         |   |  |         |         |         |        |   |
|                                                                                                                                                                                                                                                                                                                                                                                                                                                                                                                                                                                                                                                                                                                                                                                                                                                                                                                                                                                                                                                                                                                                                                                                                                                                                                                                                                                                                                                                                                                                                                                                                                                                                                                                                                                                                                                                                                                                                                                                                                                                                                                                                                                                                                                                                                                                                                                                          | -237.07 | -108.38       | -360.77 | 158.507 | 0       |                                                                  |  |               |       |   |                 |                                                                  |       |           |       |       |             |       |   |           |       |   |              |                                                                                                                                                                                                                                                                                                                                                                                          |  |  |  |  |              |       |  |               |       |   |           |       |         |           |         |        |           |       |         |           |         |         |           |                                                                                                                                                                                                                                                                                                                                                                                          |         |         |         |         |  |       |         |               |         |         |           |        |   |           |         |         |           |         |   |           |         |         |           |         |   |         |         |         |  |         |   |         |         |         |       |         |         |   |         |         |  |         |         |   |         |         |  |        |         |   |         |         |  |         |         |   |         |         |       |         |         |         |   |         |  |         |         |         |   |         |  |         |         |         |   |         |  |         |        |         |   |         |       |         |        |         |         |   |  |         |         |         |         |   |  |         |         |         |         |   |  |         |         |         |         |   |                                                                                                                                                                                                                                                                                                                                                                                                                                                                                                                                                                                                                                                                                                                                                                                                                                                                                                                                                                                                                                                                                                                                                                                                                                                                                                                                                                                                                                                                                                                                                                                                                                                                                                                                                                                                                                                                                                                                                                                                                                                                                                                                                                                                                                                                                                                                                                                                     |  |  |  |  |  |           |  |  |  |  |                 |       |       |       |       |       |             |  |  |  |  |  |              |  |  |  |  |  |              |  |  |  |  |  |       |   |         |         |         |         |  |   |         |         |        |         |  |   |         |         |         |         |  |   |        |         |         |         |       |         |   |         |         |         |  |         |   |        |         |         |  |         |   |         |         |         |  |         |   |         |         |         |       |         |         |   |         |         |  |         |        |   |         |         |  |         |        |   |         |         |  |         |         |   |         |         |       |         |         |         |   |         |  |        |         |         |   |        |  |         |        |        |   |         |  |         |         |         |   |         |       |         |         |         |         |   |  |         |         |         |        |   |  |         |         |         |         |   |  |         |         |         |         |   |                                                                                                                                                                                                                                                                                                                                                                                                                                                                                                                                                                                                                                                                                                                                                                                                                                                                                                                                                                                                                                                                                                                                                                                                                                                                                                                                                                                                                                                                                                                                                                                                                                                                                                                                                                                                                                                                                                                                                                                                                                                                                                                                                                                                                                                                                                                                                                                                           |  |  |  |  |  |           |  |  |  |  |                 |       |       |       |       |       |             |  |  |  |  |  |              |  |  |  |  |  |              |  |  |  |  |  |       |   |         |         |         |         |  |   |         |         |         |         |  |   |         |         |         |         |  |   |         |         |         |         |       |         |   |         |         |         |  |         |   |         |         |         |  |         |   |         |         |         |  |         |   |         |         |         |       |         |         |   |         |        |  |         |         |   |         |         |  |         |         |   |         |         |  |         |         |   |        |         |       |         |         |         |   |         |  |         |         |         |   |         |  |         |        |         |   |         |  |         |         |         |   |         |       |         |         |         |         |   |  |         |         |         |         |   |  |         |         |         |         |   |  |         |         |         |        |   |
|                                                                                                                                                                                                                                                                                                                                                                                                                                                                                                                                                                                                                                                                                                                                                                                                                                                                                                                                                                                                                                                                                                                                                                                                                                                                                                                                                                                                                                                                                                                                                                                                                                                                                                                                                                                                                                                                                                                                                                                                                                                                                                                                                                                                                                                                                                                                                                                                          | -167.86 | -36.093       | -288.49 | 222.26  | 0       |                                                                  |  |               |       |   |                 |                                                                  |       |           |       |       |             |       |   |           |       |   |              |                                                                                                                                                                                                                                                                                                                                                                                          |  |  |  |  |              |       |  |               |       |   |           |       |         |           |         |        |           |       |         |           |         |         |           |                                                                                                                                                                                                                                                                                                                                                                                          |         |         |         |         |  |       |         |               |         |         |           |        |   |           |         |         |           |         |   |           |         |         |           |         |   |         |         |         |  |         |   |         |         |         |       |         |         |   |         |         |  |         |         |   |         |         |  |        |         |   |         |         |  |         |         |   |         |         |       |         |         |         |   |         |  |         |         |         |   |         |  |         |         |         |   |         |  |         |        |         |   |         |       |         |        |         |         |   |  |         |         |         |         |   |  |         |         |         |         |   |  |         |         |         |         |   |                                                                                                                                                                                                                                                                                                                                                                                                                                                                                                                                                                                                                                                                                                                                                                                                                                                                                                                                                                                                                                                                                                                                                                                                                                                                                                                                                                                                                                                                                                                                                                                                                                                                                                                                                                                                                                                                                                                                                                                                                                                                                                                                                                                                                                                                                                                                                                                                     |  |  |  |  |  |           |  |  |  |  |                 |       |       |       |       |       |             |  |  |  |  |  |              |  |  |  |  |  |              |  |  |  |  |  |       |   |         |         |         |         |  |   |         |         |        |         |  |   |         |         |         |         |  |   |        |         |         |         |       |         |   |         |         |         |  |         |   |        |         |         |  |         |   |         |         |         |  |         |   |         |         |         |       |         |         |   |         |         |  |         |        |   |         |         |  |         |        |   |         |         |  |         |         |   |         |         |       |         |         |         |   |         |  |        |         |         |   |        |  |         |        |        |   |         |  |         |         |         |   |         |       |         |         |         |         |   |  |         |         |         |        |   |  |         |         |         |         |   |  |         |         |         |         |   |                                                                                                                                                                                                                                                                                                                                                                                                                                                                                                                                                                                                                                                                                                                                                                                                                                                                                                                                                                                                                                                                                                                                                                                                                                                                                                                                                                                                                                                                                                                                                                                                                                                                                                                                                                                                                                                                                                                                                                                                                                                                                                                                                                                                                                                                                                                                                                                                           |  |  |  |  |  |           |  |  |  |  |                 |       |       |       |       |       |             |  |  |  |  |  |              |  |  |  |  |  |              |  |  |  |  |  |       |   |         |         |         |         |  |   |         |         |         |         |  |   |         |         |         |         |  |   |         |         |         |         |       |         |   |         |         |         |  |         |   |         |         |         |  |         |   |         |         |         |  |         |   |         |         |         |       |         |         |   |         |        |  |         |         |   |         |         |  |         |         |   |         |         |  |         |         |   |        |         |       |         |         |         |   |         |  |         |         |         |   |         |  |         |        |         |   |         |  |         |         |         |   |         |       |         |         |         |         |   |  |         |         |         |         |   |  |         |         |         |         |   |  |         |         |         |        |   |
| <table border="1"> <thead> <tr><th>Level</th><th></th><th>Least Sq Mean</th></tr> </thead> <tbody> <tr><td>Dc FI</td><td>A</td><td>575.64851</td></tr> <tr><td>Aq-FI</td><td>B</td><td>434.45397</td></tr> <tr><td>Dc Aq</td><td>B C</td><td>361.33348</td></tr> <tr><td>Sc FI</td><td>C</td><td>327.50386</td></tr> <tr><td>Sc Aq</td><td>D</td><td>160.31719</td></tr> </tbody> </table>                                                                                                                                                                                                                                                                                                                                                                                                                                                                                                                                                                                                                                                                                                                                                                                                                                                                                                                                                                                                                                                                                                                                                                                                                                                                                                                                                                                                                                                                                                                                                                                                                                                                                                                                                                                                                                                                                                                                                                                                               |         |               |         |         |         | Level                                                            |  | Least Sq Mean | Dc FI | A | 575.64851       | Aq-FI                                                            | B     | 434.45397 | Dc Aq | B C   | 361.33348   | Sc FI | C | 327.50386 | Sc Aq | D | 160.31719    | <table border="1"> <thead> <tr><th>Level</th><th></th><th>Least Sq Mean</th></tr> </thead> <tbody> <tr><td>Dc FI</td><td>A</td><td>609.34338</td></tr> <tr><td>Aq-FI</td><td>B</td><td>458.99416</td></tr> <tr><td>Dc Aq</td><td>C</td><td>369.21989</td></tr> <tr><td>Sc FI</td><td>C</td><td>338.22811</td></tr> <tr><td>Sc Aq</td><td>D</td><td>174.78121</td></tr> </tbody> </table> |  |  |  |  |              | Level |  | Least Sq Mean | Dc FI | A | 609.34338 | Aq-FI | B       | 458.99416 | Dc Aq   | C      | 369.21989 | Sc FI | C       | 338.22811 | Sc Aq   | D       | 174.78121 | <table border="1"> <thead> <tr><th>Level</th><th></th><th>Least Sq Mean</th></tr> </thead> <tbody> <tr><td>Dc FI</td><td>A</td><td>675.10689</td></tr> <tr><td>Aq-FI</td><td>B</td><td>552.94189</td></tr> <tr><td>Dc Aq</td><td>C</td><td>422.71457</td></tr> <tr><td>Sc FI</td><td>D</td><td>350.47680</td></tr> <tr><td>Sc Aq</td><td>E</td><td>160.09321</td></tr> </tbody> </table> |         |         |         |         |  | Level |         | Least Sq Mean | Dc FI   | A       | 675.10689 | Aq-FI  | B | 552.94189 | Dc Aq   | C       | 422.71457 | Sc FI   | D | 350.47680 | Sc Aq   | E       | 160.09321 |         |   |         |         |         |  |         |   |         |         |         |       |         |         |   |         |         |  |         |         |   |         |         |  |        |         |   |         |         |  |         |         |   |         |         |       |         |         |         |   |         |  |         |         |         |   |         |  |         |         |         |   |         |  |         |        |         |   |         |       |         |        |         |         |   |  |         |         |         |         |   |  |         |         |         |         |   |  |         |         |         |         |   |                                                                                                                                                                                                                                                                                                                                                                                                                                                                                                                                                                                                                                                                                                                                                                                                                                                                                                                                                                                                                                                                                                                                                                                                                                                                                                                                                                                                                                                                                                                                                                                                                                                                                                                                                                                                                                                                                                                                                                                                                                                                                                                                                                                                                                                                                                                                                                                                     |  |  |  |  |  |           |  |  |  |  |                 |       |       |       |       |       |             |  |  |  |  |  |              |  |  |  |  |  |              |  |  |  |  |  |       |   |         |         |         |         |  |   |         |         |        |         |  |   |         |         |         |         |  |   |        |         |         |         |       |         |   |         |         |         |  |         |   |        |         |         |  |         |   |         |         |         |  |         |   |         |         |         |       |         |         |   |         |         |  |         |        |   |         |         |  |         |        |   |         |         |  |         |         |   |         |         |       |         |         |         |   |         |  |        |         |         |   |        |  |         |        |        |   |         |  |         |         |         |   |         |       |         |         |         |         |   |  |         |         |         |        |   |  |         |         |         |         |   |  |         |         |         |         |   |                                                                                                                                                                                                                                                                                                                                                                                                                                                                                                                                                                                                                                                                                                                                                                                                                                                                                                                                                                                                                                                                                                                                                                                                                                                                                                                                                                                                                                                                                                                                                                                                                                                                                                                                                                                                                                                                                                                                                                                                                                                                                                                                                                                                                                                                                                                                                                                                           |  |  |  |  |  |           |  |  |  |  |                 |       |       |       |       |       |             |  |  |  |  |  |              |  |  |  |  |  |              |  |  |  |  |  |       |   |         |         |         |         |  |   |         |         |         |         |  |   |         |         |         |         |  |   |         |         |         |         |       |         |   |         |         |         |  |         |   |         |         |         |  |         |   |         |         |         |  |         |   |         |         |         |       |         |         |   |         |        |  |         |         |   |         |         |  |         |         |   |         |         |  |         |         |   |        |         |       |         |         |         |   |         |  |         |         |         |   |         |  |         |        |         |   |         |  |         |         |         |   |         |       |         |         |         |         |   |  |         |         |         |         |   |  |         |         |         |         |   |  |         |         |         |        |   |
| Level                                                                                                                                                                                                                                                                                                                                                                                                                                                                                                                                                                                                                                                                                                                                                                                                                                                                                                                                                                                                                                                                                                                                                                                                                                                                                                                                                                                                                                                                                                                                                                                                                                                                                                                                                                                                                                                                                                                                                                                                                                                                                                                                                                                                                                                                                                                                                                                                    |         | Least Sq Mean |         |         |         |                                                                  |  |               |       |   |                 |                                                                  |       |           |       |       |             |       |   |           |       |   |              |                                                                                                                                                                                                                                                                                                                                                                                          |  |  |  |  |              |       |  |               |       |   |           |       |         |           |         |        |           |       |         |           |         |         |           |                                                                                                                                                                                                                                                                                                                                                                                          |         |         |         |         |  |       |         |               |         |         |           |        |   |           |         |         |           |         |   |           |         |         |           |         |   |         |         |         |  |         |   |         |         |         |       |         |         |   |         |         |  |         |         |   |         |         |  |        |         |   |         |         |  |         |         |   |         |         |       |         |         |         |   |         |  |         |         |         |   |         |  |         |         |         |   |         |  |         |        |         |   |         |       |         |        |         |         |   |  |         |         |         |         |   |  |         |         |         |         |   |  |         |         |         |         |   |                                                                                                                                                                                                                                                                                                                                                                                                                                                                                                                                                                                                                                                                                                                                                                                                                                                                                                                                                                                                                                                                                                                                                                                                                                                                                                                                                                                                                                                                                                                                                                                                                                                                                                                                                                                                                                                                                                                                                                                                                                                                                                                                                                                                                                                                                                                                                                                                     |  |  |  |  |  |           |  |  |  |  |                 |       |       |       |       |       |             |  |  |  |  |  |              |  |  |  |  |  |              |  |  |  |  |  |       |   |         |         |         |         |  |   |         |         |        |         |  |   |         |         |         |         |  |   |        |         |         |         |       |         |   |         |         |         |  |         |   |        |         |         |  |         |   |         |         |         |  |         |   |         |         |         |       |         |         |   |         |         |  |         |        |   |         |         |  |         |        |   |         |         |  |         |         |   |         |         |       |         |         |         |   |         |  |        |         |         |   |        |  |         |        |        |   |         |  |         |         |         |   |         |       |         |         |         |         |   |  |         |         |         |        |   |  |         |         |         |         |   |  |         |         |         |         |   |                                                                                                                                                                                                                                                                                                                                                                                                                                                                                                                                                                                                                                                                                                                                                                                                                                                                                                                                                                                                                                                                                                                                                                                                                                                                                                                                                                                                                                                                                                                                                                                                                                                                                                                                                                                                                                                                                                                                                                                                                                                                                                                                                                                                                                                                                                                                                                                                           |  |  |  |  |  |           |  |  |  |  |                 |       |       |       |       |       |             |  |  |  |  |  |              |  |  |  |  |  |              |  |  |  |  |  |       |   |         |         |         |         |  |   |         |         |         |         |  |   |         |         |         |         |  |   |         |         |         |         |       |         |   |         |         |         |  |         |   |         |         |         |  |         |   |         |         |         |  |         |   |         |         |         |       |         |         |   |         |        |  |         |         |   |         |         |  |         |         |   |         |         |  |         |         |   |        |         |       |         |         |         |   |         |  |         |         |         |   |         |  |         |        |         |   |         |  |         |         |         |   |         |       |         |         |         |         |   |  |         |         |         |         |   |  |         |         |         |         |   |  |         |         |         |        |   |
| Dc FI                                                                                                                                                                                                                                                                                                                                                                                                                                                                                                                                                                                                                                                                                                                                                                                                                                                                                                                                                                                                                                                                                                                                                                                                                                                                                                                                                                                                                                                                                                                                                                                                                                                                                                                                                                                                                                                                                                                                                                                                                                                                                                                                                                                                                                                                                                                                                                                                    | A       | 575.64851     |         |         |         |                                                                  |  |               |       |   |                 |                                                                  |       |           |       |       |             |       |   |           |       |   |              |                                                                                                                                                                                                                                                                                                                                                                                          |  |  |  |  |              |       |  |               |       |   |           |       |         |           |         |        |           |       |         |           |         |         |           |                                                                                                                                                                                                                                                                                                                                                                                          |         |         |         |         |  |       |         |               |         |         |           |        |   |           |         |         |           |         |   |           |         |         |           |         |   |         |         |         |  |         |   |         |         |         |       |         |         |   |         |         |  |         |         |   |         |         |  |        |         |   |         |         |  |         |         |   |         |         |       |         |         |         |   |         |  |         |         |         |   |         |  |         |         |         |   |         |  |         |        |         |   |         |       |         |        |         |         |   |  |         |         |         |         |   |  |         |         |         |         |   |  |         |         |         |         |   |                                                                                                                                                                                                                                                                                                                                                                                                                                                                                                                                                                                                                                                                                                                                                                                                                                                                                                                                                                                                                                                                                                                                                                                                                                                                                                                                                                                                                                                                                                                                                                                                                                                                                                                                                                                                                                                                                                                                                                                                                                                                                                                                                                                                                                                                                                                                                                                                     |  |  |  |  |  |           |  |  |  |  |                 |       |       |       |       |       |             |  |  |  |  |  |              |  |  |  |  |  |              |  |  |  |  |  |       |   |         |         |         |         |  |   |         |         |        |         |  |   |         |         |         |         |  |   |        |         |         |         |       |         |   |         |         |         |  |         |   |        |         |         |  |         |   |         |         |         |  |         |   |         |         |         |       |         |         |   |         |         |  |         |        |   |         |         |  |         |        |   |         |         |  |         |         |   |         |         |       |         |         |         |   |         |  |        |         |         |   |        |  |         |        |        |   |         |  |         |         |         |   |         |       |         |         |         |         |   |  |         |         |         |        |   |  |         |         |         |         |   |  |         |         |         |         |   |                                                                                                                                                                                                                                                                                                                                                                                                                                                                                                                                                                                                                                                                                                                                                                                                                                                                                                                                                                                                                                                                                                                                                                                                                                                                                                                                                                                                                                                                                                                                                                                                                                                                                                                                                                                                                                                                                                                                                                                                                                                                                                                                                                                                                                                                                                                                                                                                           |  |  |  |  |  |           |  |  |  |  |                 |       |       |       |       |       |             |  |  |  |  |  |              |  |  |  |  |  |              |  |  |  |  |  |       |   |         |         |         |         |  |   |         |         |         |         |  |   |         |         |         |         |  |   |         |         |         |         |       |         |   |         |         |         |  |         |   |         |         |         |  |         |   |         |         |         |  |         |   |         |         |         |       |         |         |   |         |        |  |         |         |   |         |         |  |         |         |   |         |         |  |         |         |   |        |         |       |         |         |         |   |         |  |         |         |         |   |         |  |         |        |         |   |         |  |         |         |         |   |         |       |         |         |         |         |   |  |         |         |         |         |   |  |         |         |         |         |   |  |         |         |         |        |   |
| Aq-FI                                                                                                                                                                                                                                                                                                                                                                                                                                                                                                                                                                                                                                                                                                                                                                                                                                                                                                                                                                                                                                                                                                                                                                                                                                                                                                                                                                                                                                                                                                                                                                                                                                                                                                                                                                                                                                                                                                                                                                                                                                                                                                                                                                                                                                                                                                                                                                                                    | B       | 434.45397     |         |         |         |                                                                  |  |               |       |   |                 |                                                                  |       |           |       |       |             |       |   |           |       |   |              |                                                                                                                                                                                                                                                                                                                                                                                          |  |  |  |  |              |       |  |               |       |   |           |       |         |           |         |        |           |       |         |           |         |         |           |                                                                                                                                                                                                                                                                                                                                                                                          |         |         |         |         |  |       |         |               |         |         |           |        |   |           |         |         |           |         |   |           |         |         |           |         |   |         |         |         |  |         |   |         |         |         |       |         |         |   |         |         |  |         |         |   |         |         |  |        |         |   |         |         |  |         |         |   |         |         |       |         |         |         |   |         |  |         |         |         |   |         |  |         |         |         |   |         |  |         |        |         |   |         |       |         |        |         |         |   |  |         |         |         |         |   |  |         |         |         |         |   |  |         |         |         |         |   |                                                                                                                                                                                                                                                                                                                                                                                                                                                                                                                                                                                                                                                                                                                                                                                                                                                                                                                                                                                                                                                                                                                                                                                                                                                                                                                                                                                                                                                                                                                                                                                                                                                                                                                                                                                                                                                                                                                                                                                                                                                                                                                                                                                                                                                                                                                                                                                                     |  |  |  |  |  |           |  |  |  |  |                 |       |       |       |       |       |             |  |  |  |  |  |              |  |  |  |  |  |              |  |  |  |  |  |       |   |         |         |         |         |  |   |         |         |        |         |  |   |         |         |         |         |  |   |        |         |         |         |       |         |   |         |         |         |  |         |   |        |         |         |  |         |   |         |         |         |  |         |   |         |         |         |       |         |         |   |         |         |  |         |        |   |         |         |  |         |        |   |         |         |  |         |         |   |         |         |       |         |         |         |   |         |  |        |         |         |   |        |  |         |        |        |   |         |  |         |         |         |   |         |       |         |         |         |         |   |  |         |         |         |        |   |  |         |         |         |         |   |  |         |         |         |         |   |                                                                                                                                                                                                                                                                                                                                                                                                                                                                                                                                                                                                                                                                                                                                                                                                                                                                                                                                                                                                                                                                                                                                                                                                                                                                                                                                                                                                                                                                                                                                                                                                                                                                                                                                                                                                                                                                                                                                                                                                                                                                                                                                                                                                                                                                                                                                                                                                           |  |  |  |  |  |           |  |  |  |  |                 |       |       |       |       |       |             |  |  |  |  |  |              |  |  |  |  |  |              |  |  |  |  |  |       |   |         |         |         |         |  |   |         |         |         |         |  |   |         |         |         |         |  |   |         |         |         |         |       |         |   |         |         |         |  |         |   |         |         |         |  |         |   |         |         |         |  |         |   |         |         |         |       |         |         |   |         |        |  |         |         |   |         |         |  |         |         |   |         |         |  |         |         |   |        |         |       |         |         |         |   |         |  |         |         |         |   |         |  |         |        |         |   |         |  |         |         |         |   |         |       |         |         |         |         |   |  |         |         |         |         |   |  |         |         |         |         |   |  |         |         |         |        |   |
| Dc Aq                                                                                                                                                                                                                                                                                                                                                                                                                                                                                                                                                                                                                                                                                                                                                                                                                                                                                                                                                                                                                                                                                                                                                                                                                                                                                                                                                                                                                                                                                                                                                                                                                                                                                                                                                                                                                                                                                                                                                                                                                                                                                                                                                                                                                                                                                                                                                                                                    | B C     | 361.33348     |         |         |         |                                                                  |  |               |       |   |                 |                                                                  |       |           |       |       |             |       |   |           |       |   |              |                                                                                                                                                                                                                                                                                                                                                                                          |  |  |  |  |              |       |  |               |       |   |           |       |         |           |         |        |           |       |         |           |         |         |           |                                                                                                                                                                                                                                                                                                                                                                                          |         |         |         |         |  |       |         |               |         |         |           |        |   |           |         |         |           |         |   |           |         |         |           |         |   |         |         |         |  |         |   |         |         |         |       |         |         |   |         |         |  |         |         |   |         |         |  |        |         |   |         |         |  |         |         |   |         |         |       |         |         |         |   |         |  |         |         |         |   |         |  |         |         |         |   |         |  |         |        |         |   |         |       |         |        |         |         |   |  |         |         |         |         |   |  |         |         |         |         |   |  |         |         |         |         |   |                                                                                                                                                                                                                                                                                                                                                                                                                                                                                                                                                                                                                                                                                                                                                                                                                                                                                                                                                                                                                                                                                                                                                                                                                                                                                                                                                                                                                                                                                                                                                                                                                                                                                                                                                                                                                                                                                                                                                                                                                                                                                                                                                                                                                                                                                                                                                                                                     |  |  |  |  |  |           |  |  |  |  |                 |       |       |       |       |       |             |  |  |  |  |  |              |  |  |  |  |  |              |  |  |  |  |  |       |   |         |         |         |         |  |   |         |         |        |         |  |   |         |         |         |         |  |   |        |         |         |         |       |         |   |         |         |         |  |         |   |        |         |         |  |         |   |         |         |         |  |         |   |         |         |         |       |         |         |   |         |         |  |         |        |   |         |         |  |         |        |   |         |         |  |         |         |   |         |         |       |         |         |         |   |         |  |        |         |         |   |        |  |         |        |        |   |         |  |         |         |         |   |         |       |         |         |         |         |   |  |         |         |         |        |   |  |         |         |         |         |   |  |         |         |         |         |   |                                                                                                                                                                                                                                                                                                                                                                                                                                                                                                                                                                                                                                                                                                                                                                                                                                                                                                                                                                                                                                                                                                                                                                                                                                                                                                                                                                                                                                                                                                                                                                                                                                                                                                                                                                                                                                                                                                                                                                                                                                                                                                                                                                                                                                                                                                                                                                                                           |  |  |  |  |  |           |  |  |  |  |                 |       |       |       |       |       |             |  |  |  |  |  |              |  |  |  |  |  |              |  |  |  |  |  |       |   |         |         |         |         |  |   |         |         |         |         |  |   |         |         |         |         |  |   |         |         |         |         |       |         |   |         |         |         |  |         |   |         |         |         |  |         |   |         |         |         |  |         |   |         |         |         |       |         |         |   |         |        |  |         |         |   |         |         |  |         |         |   |         |         |  |         |         |   |        |         |       |         |         |         |   |         |  |         |         |         |   |         |  |         |        |         |   |         |  |         |         |         |   |         |       |         |         |         |         |   |  |         |         |         |         |   |  |         |         |         |         |   |  |         |         |         |        |   |
| Sc FI                                                                                                                                                                                                                                                                                                                                                                                                                                                                                                                                                                                                                                                                                                                                                                                                                                                                                                                                                                                                                                                                                                                                                                                                                                                                                                                                                                                                                                                                                                                                                                                                                                                                                                                                                                                                                                                                                                                                                                                                                                                                                                                                                                                                                                                                                                                                                                                                    | C       | 327.50386     |         |         |         |                                                                  |  |               |       |   |                 |                                                                  |       |           |       |       |             |       |   |           |       |   |              |                                                                                                                                                                                                                                                                                                                                                                                          |  |  |  |  |              |       |  |               |       |   |           |       |         |           |         |        |           |       |         |           |         |         |           |                                                                                                                                                                                                                                                                                                                                                                                          |         |         |         |         |  |       |         |               |         |         |           |        |   |           |         |         |           |         |   |           |         |         |           |         |   |         |         |         |  |         |   |         |         |         |       |         |         |   |         |         |  |         |         |   |         |         |  |        |         |   |         |         |  |         |         |   |         |         |       |         |         |         |   |         |  |         |         |         |   |         |  |         |         |         |   |         |  |         |        |         |   |         |       |         |        |         |         |   |  |         |         |         |         |   |  |         |         |         |         |   |  |         |         |         |         |   |                                                                                                                                                                                                                                                                                                                                                                                                                                                                                                                                                                                                                                                                                                                                                                                                                                                                                                                                                                                                                                                                                                                                                                                                                                                                                                                                                                                                                                                                                                                                                                                                                                                                                                                                                                                                                                                                                                                                                                                                                                                                                                                                                                                                                                                                                                                                                                                                     |  |  |  |  |  |           |  |  |  |  |                 |       |       |       |       |       |             |  |  |  |  |  |              |  |  |  |  |  |              |  |  |  |  |  |       |   |         |         |         |         |  |   |         |         |        |         |  |   |         |         |         |         |  |   |        |         |         |         |       |         |   |         |         |         |  |         |   |        |         |         |  |         |   |         |         |         |  |         |   |         |         |         |       |         |         |   |         |         |  |         |        |   |         |         |  |         |        |   |         |         |  |         |         |   |         |         |       |         |         |         |   |         |  |        |         |         |   |        |  |         |        |        |   |         |  |         |         |         |   |         |       |         |         |         |         |   |  |         |         |         |        |   |  |         |         |         |         |   |  |         |         |         |         |   |                                                                                                                                                                                                                                                                                                                                                                                                                                                                                                                                                                                                                                                                                                                                                                                                                                                                                                                                                                                                                                                                                                                                                                                                                                                                                                                                                                                                                                                                                                                                                                                                                                                                                                                                                                                                                                                                                                                                                                                                                                                                                                                                                                                                                                                                                                                                                                                                           |  |  |  |  |  |           |  |  |  |  |                 |       |       |       |       |       |             |  |  |  |  |  |              |  |  |  |  |  |              |  |  |  |  |  |       |   |         |         |         |         |  |   |         |         |         |         |  |   |         |         |         |         |  |   |         |         |         |         |       |         |   |         |         |         |  |         |   |         |         |         |  |         |   |         |         |         |  |         |   |         |         |         |       |         |         |   |         |        |  |         |         |   |         |         |  |         |         |   |         |         |  |         |         |   |        |         |       |         |         |         |   |         |  |         |         |         |   |         |  |         |        |         |   |         |  |         |         |         |   |         |       |         |         |         |         |   |  |         |         |         |         |   |  |         |         |         |         |   |  |         |         |         |        |   |
| Sc Aq                                                                                                                                                                                                                                                                                                                                                                                                                                                                                                                                                                                                                                                                                                                                                                                                                                                                                                                                                                                                                                                                                                                                                                                                                                                                                                                                                                                                                                                                                                                                                                                                                                                                                                                                                                                                                                                                                                                                                                                                                                                                                                                                                                                                                                                                                                                                                                                                    | D       | 160.31719     |         |         |         |                                                                  |  |               |       |   |                 |                                                                  |       |           |       |       |             |       |   |           |       |   |              |                                                                                                                                                                                                                                                                                                                                                                                          |  |  |  |  |              |       |  |               |       |   |           |       |         |           |         |        |           |       |         |           |         |         |           |                                                                                                                                                                                                                                                                                                                                                                                          |         |         |         |         |  |       |         |               |         |         |           |        |   |           |         |         |           |         |   |           |         |         |           |         |   |         |         |         |  |         |   |         |         |         |       |         |         |   |         |         |  |         |         |   |         |         |  |        |         |   |         |         |  |         |         |   |         |         |       |         |         |         |   |         |  |         |         |         |   |         |  |         |         |         |   |         |  |         |        |         |   |         |       |         |        |         |         |   |  |         |         |         |         |   |  |         |         |         |         |   |  |         |         |         |         |   |                                                                                                                                                                                                                                                                                                                                                                                                                                                                                                                                                                                                                                                                                                                                                                                                                                                                                                                                                                                                                                                                                                                                                                                                                                                                                                                                                                                                                                                                                                                                                                                                                                                                                                                                                                                                                                                                                                                                                                                                                                                                                                                                                                                                                                                                                                                                                                                                     |  |  |  |  |  |           |  |  |  |  |                 |       |       |       |       |       |             |  |  |  |  |  |              |  |  |  |  |  |              |  |  |  |  |  |       |   |         |         |         |         |  |   |         |         |        |         |  |   |         |         |         |         |  |   |        |         |         |         |       |         |   |         |         |         |  |         |   |        |         |         |  |         |   |         |         |         |  |         |   |         |         |         |       |         |         |   |         |         |  |         |        |   |         |         |  |         |        |   |         |         |  |         |         |   |         |         |       |         |         |         |   |         |  |        |         |         |   |        |  |         |        |        |   |         |  |         |         |         |   |         |       |         |         |         |         |   |  |         |         |         |        |   |  |         |         |         |         |   |  |         |         |         |         |   |                                                                                                                                                                                                                                                                                                                                                                                                                                                                                                                                                                                                                                                                                                                                                                                                                                                                                                                                                                                                                                                                                                                                                                                                                                                                                                                                                                                                                                                                                                                                                                                                                                                                                                                                                                                                                                                                                                                                                                                                                                                                                                                                                                                                                                                                                                                                                                                                           |  |  |  |  |  |           |  |  |  |  |                 |       |       |       |       |       |             |  |  |  |  |  |              |  |  |  |  |  |              |  |  |  |  |  |       |   |         |         |         |         |  |   |         |         |         |         |  |   |         |         |         |         |  |   |         |         |         |         |       |         |   |         |         |         |  |         |   |         |         |         |  |         |   |         |         |         |  |         |   |         |         |         |       |         |         |   |         |        |  |         |         |   |         |         |  |         |         |   |         |         |  |         |         |   |        |         |       |         |         |         |   |         |  |         |         |         |   |         |  |         |        |         |   |         |  |         |         |         |   |         |       |         |         |         |         |   |  |         |         |         |         |   |  |         |         |         |         |   |  |         |         |         |        |   |
| Level                                                                                                                                                                                                                                                                                                                                                                                                                                                                                                                                                                                                                                                                                                                                                                                                                                                                                                                                                                                                                                                                                                                                                                                                                                                                                                                                                                                                                                                                                                                                                                                                                                                                                                                                                                                                                                                                                                                                                                                                                                                                                                                                                                                                                                                                                                                                                                                                    |         | Least Sq Mean |         |         |         |                                                                  |  |               |       |   |                 |                                                                  |       |           |       |       |             |       |   |           |       |   |              |                                                                                                                                                                                                                                                                                                                                                                                          |  |  |  |  |              |       |  |               |       |   |           |       |         |           |         |        |           |       |         |           |         |         |           |                                                                                                                                                                                                                                                                                                                                                                                          |         |         |         |         |  |       |         |               |         |         |           |        |   |           |         |         |           |         |   |           |         |         |           |         |   |         |         |         |  |         |   |         |         |         |       |         |         |   |         |         |  |         |         |   |         |         |  |        |         |   |         |         |  |         |         |   |         |         |       |         |         |         |   |         |  |         |         |         |   |         |  |         |         |         |   |         |  |         |        |         |   |         |       |         |        |         |         |   |  |         |         |         |         |   |  |         |         |         |         |   |  |         |         |         |         |   |                                                                                                                                                                                                                                                                                                                                                                                                                                                                                                                                                                                                                                                                                                                                                                                                                                                                                                                                                                                                                                                                                                                                                                                                                                                                                                                                                                                                                                                                                                                                                                                                                                                                                                                                                                                                                                                                                                                                                                                                                                                                                                                                                                                                                                                                                                                                                                                                     |  |  |  |  |  |           |  |  |  |  |                 |       |       |       |       |       |             |  |  |  |  |  |              |  |  |  |  |  |              |  |  |  |  |  |       |   |         |         |         |         |  |   |         |         |        |         |  |   |         |         |         |         |  |   |        |         |         |         |       |         |   |         |         |         |  |         |   |        |         |         |  |         |   |         |         |         |  |         |   |         |         |         |       |         |         |   |         |         |  |         |        |   |         |         |  |         |        |   |         |         |  |         |         |   |         |         |       |         |         |         |   |         |  |        |         |         |   |        |  |         |        |        |   |         |  |         |         |         |   |         |       |         |         |         |         |   |  |         |         |         |        |   |  |         |         |         |         |   |  |         |         |         |         |   |                                                                                                                                                                                                                                                                                                                                                                                                                                                                                                                                                                                                                                                                                                                                                                                                                                                                                                                                                                                                                                                                                                                                                                                                                                                                                                                                                                                                                                                                                                                                                                                                                                                                                                                                                                                                                                                                                                                                                                                                                                                                                                                                                                                                                                                                                                                                                                                                           |  |  |  |  |  |           |  |  |  |  |                 |       |       |       |       |       |             |  |  |  |  |  |              |  |  |  |  |  |              |  |  |  |  |  |       |   |         |         |         |         |  |   |         |         |         |         |  |   |         |         |         |         |  |   |         |         |         |         |       |         |   |         |         |         |  |         |   |         |         |         |  |         |   |         |         |         |  |         |   |         |         |         |       |         |         |   |         |        |  |         |         |   |         |         |  |         |         |   |         |         |  |         |         |   |        |         |       |         |         |         |   |         |  |         |         |         |   |         |  |         |        |         |   |         |  |         |         |         |   |         |       |         |         |         |         |   |  |         |         |         |         |   |  |         |         |         |         |   |  |         |         |         |        |   |
| Dc FI                                                                                                                                                                                                                                                                                                                                                                                                                                                                                                                                                                                                                                                                                                                                                                                                                                                                                                                                                                                                                                                                                                                                                                                                                                                                                                                                                                                                                                                                                                                                                                                                                                                                                                                                                                                                                                                                                                                                                                                                                                                                                                                                                                                                                                                                                                                                                                                                    | A       | 609.34338     |         |         |         |                                                                  |  |               |       |   |                 |                                                                  |       |           |       |       |             |       |   |           |       |   |              |                                                                                                                                                                                                                                                                                                                                                                                          |  |  |  |  |              |       |  |               |       |   |           |       |         |           |         |        |           |       |         |           |         |         |           |                                                                                                                                                                                                                                                                                                                                                                                          |         |         |         |         |  |       |         |               |         |         |           |        |   |           |         |         |           |         |   |           |         |         |           |         |   |         |         |         |  |         |   |         |         |         |       |         |         |   |         |         |  |         |         |   |         |         |  |        |         |   |         |         |  |         |         |   |         |         |       |         |         |         |   |         |  |         |         |         |   |         |  |         |         |         |   |         |  |         |        |         |   |         |       |         |        |         |         |   |  |         |         |         |         |   |  |         |         |         |         |   |  |         |         |         |         |   |                                                                                                                                                                                                                                                                                                                                                                                                                                                                                                                                                                                                                                                                                                                                                                                                                                                                                                                                                                                                                                                                                                                                                                                                                                                                                                                                                                                                                                                                                                                                                                                                                                                                                                                                                                                                                                                                                                                                                                                                                                                                                                                                                                                                                                                                                                                                                                                                     |  |  |  |  |  |           |  |  |  |  |                 |       |       |       |       |       |             |  |  |  |  |  |              |  |  |  |  |  |              |  |  |  |  |  |       |   |         |         |         |         |  |   |         |         |        |         |  |   |         |         |         |         |  |   |        |         |         |         |       |         |   |         |         |         |  |         |   |        |         |         |  |         |   |         |         |         |  |         |   |         |         |         |       |         |         |   |         |         |  |         |        |   |         |         |  |         |        |   |         |         |  |         |         |   |         |         |       |         |         |         |   |         |  |        |         |         |   |        |  |         |        |        |   |         |  |         |         |         |   |         |       |         |         |         |         |   |  |         |         |         |        |   |  |         |         |         |         |   |  |         |         |         |         |   |                                                                                                                                                                                                                                                                                                                                                                                                                                                                                                                                                                                                                                                                                                                                                                                                                                                                                                                                                                                                                                                                                                                                                                                                                                                                                                                                                                                                                                                                                                                                                                                                                                                                                                                                                                                                                                                                                                                                                                                                                                                                                                                                                                                                                                                                                                                                                                                                           |  |  |  |  |  |           |  |  |  |  |                 |       |       |       |       |       |             |  |  |  |  |  |              |  |  |  |  |  |              |  |  |  |  |  |       |   |         |         |         |         |  |   |         |         |         |         |  |   |         |         |         |         |  |   |         |         |         |         |       |         |   |         |         |         |  |         |   |         |         |         |  |         |   |         |         |         |  |         |   |         |         |         |       |         |         |   |         |        |  |         |         |   |         |         |  |         |         |   |         |         |  |         |         |   |        |         |       |         |         |         |   |         |  |         |         |         |   |         |  |         |        |         |   |         |  |         |         |         |   |         |       |         |         |         |         |   |  |         |         |         |         |   |  |         |         |         |         |   |  |         |         |         |        |   |
| Aq-FI                                                                                                                                                                                                                                                                                                                                                                                                                                                                                                                                                                                                                                                                                                                                                                                                                                                                                                                                                                                                                                                                                                                                                                                                                                                                                                                                                                                                                                                                                                                                                                                                                                                                                                                                                                                                                                                                                                                                                                                                                                                                                                                                                                                                                                                                                                                                                                                                    | B       | 458.99416     |         |         |         |                                                                  |  |               |       |   |                 |                                                                  |       |           |       |       |             |       |   |           |       |   |              |                                                                                                                                                                                                                                                                                                                                                                                          |  |  |  |  |              |       |  |               |       |   |           |       |         |           |         |        |           |       |         |           |         |         |           |                                                                                                                                                                                                                                                                                                                                                                                          |         |         |         |         |  |       |         |               |         |         |           |        |   |           |         |         |           |         |   |           |         |         |           |         |   |         |         |         |  |         |   |         |         |         |       |         |         |   |         |         |  |         |         |   |         |         |  |        |         |   |         |         |  |         |         |   |         |         |       |         |         |         |   |         |  |         |         |         |   |         |  |         |         |         |   |         |  |         |        |         |   |         |       |         |        |         |         |   |  |         |         |         |         |   |  |         |         |         |         |   |  |         |         |         |         |   |                                                                                                                                                                                                                                                                                                                                                                                                                                                                                                                                                                                                                                                                                                                                                                                                                                                                                                                                                                                                                                                                                                                                                                                                                                                                                                                                                                                                                                                                                                                                                                                                                                                                                                                                                                                                                                                                                                                                                                                                                                                                                                                                                                                                                                                                                                                                                                                                     |  |  |  |  |  |           |  |  |  |  |                 |       |       |       |       |       |             |  |  |  |  |  |              |  |  |  |  |  |              |  |  |  |  |  |       |   |         |         |         |         |  |   |         |         |        |         |  |   |         |         |         |         |  |   |        |         |         |         |       |         |   |         |         |         |  |         |   |        |         |         |  |         |   |         |         |         |  |         |   |         |         |         |       |         |         |   |         |         |  |         |        |   |         |         |  |         |        |   |         |         |  |         |         |   |         |         |       |         |         |         |   |         |  |        |         |         |   |        |  |         |        |        |   |         |  |         |         |         |   |         |       |         |         |         |         |   |  |         |         |         |        |   |  |         |         |         |         |   |  |         |         |         |         |   |                                                                                                                                                                                                                                                                                                                                                                                                                                                                                                                                                                                                                                                                                                                                                                                                                                                                                                                                                                                                                                                                                                                                                                                                                                                                                                                                                                                                                                                                                                                                                                                                                                                                                                                                                                                                                                                                                                                                                                                                                                                                                                                                                                                                                                                                                                                                                                                                           |  |  |  |  |  |           |  |  |  |  |                 |       |       |       |       |       |             |  |  |  |  |  |              |  |  |  |  |  |              |  |  |  |  |  |       |   |         |         |         |         |  |   |         |         |         |         |  |   |         |         |         |         |  |   |         |         |         |         |       |         |   |         |         |         |  |         |   |         |         |         |  |         |   |         |         |         |  |         |   |         |         |         |       |         |         |   |         |        |  |         |         |   |         |         |  |         |         |   |         |         |  |         |         |   |        |         |       |         |         |         |   |         |  |         |         |         |   |         |  |         |        |         |   |         |  |         |         |         |   |         |       |         |         |         |         |   |  |         |         |         |         |   |  |         |         |         |         |   |  |         |         |         |        |   |
| Dc Aq                                                                                                                                                                                                                                                                                                                                                                                                                                                                                                                                                                                                                                                                                                                                                                                                                                                                                                                                                                                                                                                                                                                                                                                                                                                                                                                                                                                                                                                                                                                                                                                                                                                                                                                                                                                                                                                                                                                                                                                                                                                                                                                                                                                                                                                                                                                                                                                                    | C       | 369.21989     |         |         |         |                                                                  |  |               |       |   |                 |                                                                  |       |           |       |       |             |       |   |           |       |   |              |                                                                                                                                                                                                                                                                                                                                                                                          |  |  |  |  |              |       |  |               |       |   |           |       |         |           |         |        |           |       |         |           |         |         |           |                                                                                                                                                                                                                                                                                                                                                                                          |         |         |         |         |  |       |         |               |         |         |           |        |   |           |         |         |           |         |   |           |         |         |           |         |   |         |         |         |  |         |   |         |         |         |       |         |         |   |         |         |  |         |         |   |         |         |  |        |         |   |         |         |  |         |         |   |         |         |       |         |         |         |   |         |  |         |         |         |   |         |  |         |         |         |   |         |  |         |        |         |   |         |       |         |        |         |         |   |  |         |         |         |         |   |  |         |         |         |         |   |  |         |         |         |         |   |                                                                                                                                                                                                                                                                                                                                                                                                                                                                                                                                                                                                                                                                                                                                                                                                                                                                                                                                                                                                                                                                                                                                                                                                                                                                                                                                                                                                                                                                                                                                                                                                                                                                                                                                                                                                                                                                                                                                                                                                                                                                                                                                                                                                                                                                                                                                                                                                     |  |  |  |  |  |           |  |  |  |  |                 |       |       |       |       |       |             |  |  |  |  |  |              |  |  |  |  |  |              |  |  |  |  |  |       |   |         |         |         |         |  |   |         |         |        |         |  |   |         |         |         |         |  |   |        |         |         |         |       |         |   |         |         |         |  |         |   |        |         |         |  |         |   |         |         |         |  |         |   |         |         |         |       |         |         |   |         |         |  |         |        |   |         |         |  |         |        |   |         |         |  |         |         |   |         |         |       |         |         |         |   |         |  |        |         |         |   |        |  |         |        |        |   |         |  |         |         |         |   |         |       |         |         |         |         |   |  |         |         |         |        |   |  |         |         |         |         |   |  |         |         |         |         |   |                                                                                                                                                                                                                                                                                                                                                                                                                                                                                                                                                                                                                                                                                                                                                                                                                                                                                                                                                                                                                                                                                                                                                                                                                                                                                                                                                                                                                                                                                                                                                                                                                                                                                                                                                                                                                                                                                                                                                                                                                                                                                                                                                                                                                                                                                                                                                                                                           |  |  |  |  |  |           |  |  |  |  |                 |       |       |       |       |       |             |  |  |  |  |  |              |  |  |  |  |  |              |  |  |  |  |  |       |   |         |         |         |         |  |   |         |         |         |         |  |   |         |         |         |         |  |   |         |         |         |         |       |         |   |         |         |         |  |         |   |         |         |         |  |         |   |         |         |         |  |         |   |         |         |         |       |         |         |   |         |        |  |         |         |   |         |         |  |         |         |   |         |         |  |         |         |   |        |         |       |         |         |         |   |         |  |         |         |         |   |         |  |         |        |         |   |         |  |         |         |         |   |         |       |         |         |         |         |   |  |         |         |         |         |   |  |         |         |         |         |   |  |         |         |         |        |   |
| Sc FI                                                                                                                                                                                                                                                                                                                                                                                                                                                                                                                                                                                                                                                                                                                                                                                                                                                                                                                                                                                                                                                                                                                                                                                                                                                                                                                                                                                                                                                                                                                                                                                                                                                                                                                                                                                                                                                                                                                                                                                                                                                                                                                                                                                                                                                                                                                                                                                                    | C       | 338.22811     |         |         |         |                                                                  |  |               |       |   |                 |                                                                  |       |           |       |       |             |       |   |           |       |   |              |                                                                                                                                                                                                                                                                                                                                                                                          |  |  |  |  |              |       |  |               |       |   |           |       |         |           |         |        |           |       |         |           |         |         |           |                                                                                                                                                                                                                                                                                                                                                                                          |         |         |         |         |  |       |         |               |         |         |           |        |   |           |         |         |           |         |   |           |         |         |           |         |   |         |         |         |  |         |   |         |         |         |       |         |         |   |         |         |  |         |         |   |         |         |  |        |         |   |         |         |  |         |         |   |         |         |       |         |         |         |   |         |  |         |         |         |   |         |  |         |         |         |   |         |  |         |        |         |   |         |       |         |        |         |         |   |  |         |         |         |         |   |  |         |         |         |         |   |  |         |         |         |         |   |                                                                                                                                                                                                                                                                                                                                                                                                                                                                                                                                                                                                                                                                                                                                                                                                                                                                                                                                                                                                                                                                                                                                                                                                                                                                                                                                                                                                                                                                                                                                                                                                                                                                                                                                                                                                                                                                                                                                                                                                                                                                                                                                                                                                                                                                                                                                                                                                     |  |  |  |  |  |           |  |  |  |  |                 |       |       |       |       |       |             |  |  |  |  |  |              |  |  |  |  |  |              |  |  |  |  |  |       |   |         |         |         |         |  |   |         |         |        |         |  |   |         |         |         |         |  |   |        |         |         |         |       |         |   |         |         |         |  |         |   |        |         |         |  |         |   |         |         |         |  |         |   |         |         |         |       |         |         |   |         |         |  |         |        |   |         |         |  |         |        |   |         |         |  |         |         |   |         |         |       |         |         |         |   |         |  |        |         |         |   |        |  |         |        |        |   |         |  |         |         |         |   |         |       |         |         |         |         |   |  |         |         |         |        |   |  |         |         |         |         |   |  |         |         |         |         |   |                                                                                                                                                                                                                                                                                                                                                                                                                                                                                                                                                                                                                                                                                                                                                                                                                                                                                                                                                                                                                                                                                                                                                                                                                                                                                                                                                                                                                                                                                                                                                                                                                                                                                                                                                                                                                                                                                                                                                                                                                                                                                                                                                                                                                                                                                                                                                                                                           |  |  |  |  |  |           |  |  |  |  |                 |       |       |       |       |       |             |  |  |  |  |  |              |  |  |  |  |  |              |  |  |  |  |  |       |   |         |         |         |         |  |   |         |         |         |         |  |   |         |         |         |         |  |   |         |         |         |         |       |         |   |         |         |         |  |         |   |         |         |         |  |         |   |         |         |         |  |         |   |         |         |         |       |         |         |   |         |        |  |         |         |   |         |         |  |         |         |   |         |         |  |         |         |   |        |         |       |         |         |         |   |         |  |         |         |         |   |         |  |         |        |         |   |         |  |         |         |         |   |         |       |         |         |         |         |   |  |         |         |         |         |   |  |         |         |         |         |   |  |         |         |         |        |   |
| Sc Aq                                                                                                                                                                                                                                                                                                                                                                                                                                                                                                                                                                                                                                                                                                                                                                                                                                                                                                                                                                                                                                                                                                                                                                                                                                                                                                                                                                                                                                                                                                                                                                                                                                                                                                                                                                                                                                                                                                                                                                                                                                                                                                                                                                                                                                                                                                                                                                                                    | D       | 174.78121     |         |         |         |                                                                  |  |               |       |   |                 |                                                                  |       |           |       |       |             |       |   |           |       |   |              |                                                                                                                                                                                                                                                                                                                                                                                          |  |  |  |  |              |       |  |               |       |   |           |       |         |           |         |        |           |       |         |           |         |         |           |                                                                                                                                                                                                                                                                                                                                                                                          |         |         |         |         |  |       |         |               |         |         |           |        |   |           |         |         |           |         |   |           |         |         |           |         |   |         |         |         |  |         |   |         |         |         |       |         |         |   |         |         |  |         |         |   |         |         |  |        |         |   |         |         |  |         |         |   |         |         |       |         |         |         |   |         |  |         |         |         |   |         |  |         |         |         |   |         |  |         |        |         |   |         |       |         |        |         |         |   |  |         |         |         |         |   |  |         |         |         |         |   |  |         |         |         |         |   |                                                                                                                                                                                                                                                                                                                                                                                                                                                                                                                                                                                                                                                                                                                                                                                                                                                                                                                                                                                                                                                                                                                                                                                                                                                                                                                                                                                                                                                                                                                                                                                                                                                                                                                                                                                                                                                                                                                                                                                                                                                                                                                                                                                                                                                                                                                                                                                                     |  |  |  |  |  |           |  |  |  |  |                 |       |       |       |       |       |             |  |  |  |  |  |              |  |  |  |  |  |              |  |  |  |  |  |       |   |         |         |         |         |  |   |         |         |        |         |  |   |         |         |         |         |  |   |        |         |         |         |       |         |   |         |         |         |  |         |   |        |         |         |  |         |   |         |         |         |  |         |   |         |         |         |       |         |         |   |         |         |  |         |        |   |         |         |  |         |        |   |         |         |  |         |         |   |         |         |       |         |         |         |   |         |  |        |         |         |   |        |  |         |        |        |   |         |  |         |         |         |   |         |       |         |         |         |         |   |  |         |         |         |        |   |  |         |         |         |         |   |  |         |         |         |         |   |                                                                                                                                                                                                                                                                                                                                                                                                                                                                                                                                                                                                                                                                                                                                                                                                                                                                                                                                                                                                                                                                                                                                                                                                                                                                                                                                                                                                                                                                                                                                                                                                                                                                                                                                                                                                                                                                                                                                                                                                                                                                                                                                                                                                                                                                                                                                                                                                           |  |  |  |  |  |           |  |  |  |  |                 |       |       |       |       |       |             |  |  |  |  |  |              |  |  |  |  |  |              |  |  |  |  |  |       |   |         |         |         |         |  |   |         |         |         |         |  |   |         |         |         |         |  |   |         |         |         |         |       |         |   |         |         |         |  |         |   |         |         |         |  |         |   |         |         |         |  |         |   |         |         |         |       |         |         |   |         |        |  |         |         |   |         |         |  |         |         |   |         |         |  |         |         |   |        |         |       |         |         |         |   |         |  |         |         |         |   |         |  |         |        |         |   |         |  |         |         |         |   |         |       |         |         |         |         |   |  |         |         |         |         |   |  |         |         |         |         |   |  |         |         |         |        |   |
| Level                                                                                                                                                                                                                                                                                                                                                                                                                                                                                                                                                                                                                                                                                                                                                                                                                                                                                                                                                                                                                                                                                                                                                                                                                                                                                                                                                                                                                                                                                                                                                                                                                                                                                                                                                                                                                                                                                                                                                                                                                                                                                                                                                                                                                                                                                                                                                                                                    |         | Least Sq Mean |         |         |         |                                                                  |  |               |       |   |                 |                                                                  |       |           |       |       |             |       |   |           |       |   |              |                                                                                                                                                                                                                                                                                                                                                                                          |  |  |  |  |              |       |  |               |       |   |           |       |         |           |         |        |           |       |         |           |         |         |           |                                                                                                                                                                                                                                                                                                                                                                                          |         |         |         |         |  |       |         |               |         |         |           |        |   |           |         |         |           |         |   |           |         |         |           |         |   |         |         |         |  |         |   |         |         |         |       |         |         |   |         |         |  |         |         |   |         |         |  |        |         |   |         |         |  |         |         |   |         |         |       |         |         |         |   |         |  |         |         |         |   |         |  |         |         |         |   |         |  |         |        |         |   |         |       |         |        |         |         |   |  |         |         |         |         |   |  |         |         |         |         |   |  |         |         |         |         |   |                                                                                                                                                                                                                                                                                                                                                                                                                                                                                                                                                                                                                                                                                                                                                                                                                                                                                                                                                                                                                                                                                                                                                                                                                                                                                                                                                                                                                                                                                                                                                                                                                                                                                                                                                                                                                                                                                                                                                                                                                                                                                                                                                                                                                                                                                                                                                                                                     |  |  |  |  |  |           |  |  |  |  |                 |       |       |       |       |       |             |  |  |  |  |  |              |  |  |  |  |  |              |  |  |  |  |  |       |   |         |         |         |         |  |   |         |         |        |         |  |   |         |         |         |         |  |   |        |         |         |         |       |         |   |         |         |         |  |         |   |        |         |         |  |         |   |         |         |         |  |         |   |         |         |         |       |         |         |   |         |         |  |         |        |   |         |         |  |         |        |   |         |         |  |         |         |   |         |         |       |         |         |         |   |         |  |        |         |         |   |        |  |         |        |        |   |         |  |         |         |         |   |         |       |         |         |         |         |   |  |         |         |         |        |   |  |         |         |         |         |   |  |         |         |         |         |   |                                                                                                                                                                                                                                                                                                                                                                                                                                                                                                                                                                                                                                                                                                                                                                                                                                                                                                                                                                                                                                                                                                                                                                                                                                                                                                                                                                                                                                                                                                                                                                                                                                                                                                                                                                                                                                                                                                                                                                                                                                                                                                                                                                                                                                                                                                                                                                                                           |  |  |  |  |  |           |  |  |  |  |                 |       |       |       |       |       |             |  |  |  |  |  |              |  |  |  |  |  |              |  |  |  |  |  |       |   |         |         |         |         |  |   |         |         |         |         |  |   |         |         |         |         |  |   |         |         |         |         |       |         |   |         |         |         |  |         |   |         |         |         |  |         |   |         |         |         |  |         |   |         |         |         |       |         |         |   |         |        |  |         |         |   |         |         |  |         |         |   |         |         |  |         |         |   |        |         |       |         |         |         |   |         |  |         |         |         |   |         |  |         |        |         |   |         |  |         |         |         |   |         |       |         |         |         |         |   |  |         |         |         |         |   |  |         |         |         |         |   |  |         |         |         |        |   |
| Dc FI                                                                                                                                                                                                                                                                                                                                                                                                                                                                                                                                                                                                                                                                                                                                                                                                                                                                                                                                                                                                                                                                                                                                                                                                                                                                                                                                                                                                                                                                                                                                                                                                                                                                                                                                                                                                                                                                                                                                                                                                                                                                                                                                                                                                                                                                                                                                                                                                    | A       | 675.10689     |         |         |         |                                                                  |  |               |       |   |                 |                                                                  |       |           |       |       |             |       |   |           |       |   |              |                                                                                                                                                                                                                                                                                                                                                                                          |  |  |  |  |              |       |  |               |       |   |           |       |         |           |         |        |           |       |         |           |         |         |           |                                                                                                                                                                                                                                                                                                                                                                                          |         |         |         |         |  |       |         |               |         |         |           |        |   |           |         |         |           |         |   |           |         |         |           |         |   |         |         |         |  |         |   |         |         |         |       |         |         |   |         |         |  |         |         |   |         |         |  |        |         |   |         |         |  |         |         |   |         |         |       |         |         |         |   |         |  |         |         |         |   |         |  |         |         |         |   |         |  |         |        |         |   |         |       |         |        |         |         |   |  |         |         |         |         |   |  |         |         |         |         |   |  |         |         |         |         |   |                                                                                                                                                                                                                                                                                                                                                                                                                                                                                                                                                                                                                                                                                                                                                                                                                                                                                                                                                                                                                                                                                                                                                                                                                                                                                                                                                                                                                                                                                                                                                                                                                                                                                                                                                                                                                                                                                                                                                                                                                                                                                                                                                                                                                                                                                                                                                                                                     |  |  |  |  |  |           |  |  |  |  |                 |       |       |       |       |       |             |  |  |  |  |  |              |  |  |  |  |  |              |  |  |  |  |  |       |   |         |         |         |         |  |   |         |         |        |         |  |   |         |         |         |         |  |   |        |         |         |         |       |         |   |         |         |         |  |         |   |        |         |         |  |         |   |         |         |         |  |         |   |         |         |         |       |         |         |   |         |         |  |         |        |   |         |         |  |         |        |   |         |         |  |         |         |   |         |         |       |         |         |         |   |         |  |        |         |         |   |        |  |         |        |        |   |         |  |         |         |         |   |         |       |         |         |         |         |   |  |         |         |         |        |   |  |         |         |         |         |   |  |         |         |         |         |   |                                                                                                                                                                                                                                                                                                                                                                                                                                                                                                                                                                                                                                                                                                                                                                                                                                                                                                                                                                                                                                                                                                                                                                                                                                                                                                                                                                                                                                                                                                                                                                                                                                                                                                                                                                                                                                                                                                                                                                                                                                                                                                                                                                                                                                                                                                                                                                                                           |  |  |  |  |  |           |  |  |  |  |                 |       |       |       |       |       |             |  |  |  |  |  |              |  |  |  |  |  |              |  |  |  |  |  |       |   |         |         |         |         |  |   |         |         |         |         |  |   |         |         |         |         |  |   |         |         |         |         |       |         |   |         |         |         |  |         |   |         |         |         |  |         |   |         |         |         |  |         |   |         |         |         |       |         |         |   |         |        |  |         |         |   |         |         |  |         |         |   |         |         |  |         |         |   |        |         |       |         |         |         |   |         |  |         |         |         |   |         |  |         |        |         |   |         |  |         |         |         |   |         |       |         |         |         |         |   |  |         |         |         |         |   |  |         |         |         |         |   |  |         |         |         |        |   |
| Aq-FI                                                                                                                                                                                                                                                                                                                                                                                                                                                                                                                                                                                                                                                                                                                                                                                                                                                                                                                                                                                                                                                                                                                                                                                                                                                                                                                                                                                                                                                                                                                                                                                                                                                                                                                                                                                                                                                                                                                                                                                                                                                                                                                                                                                                                                                                                                                                                                                                    | B       | 552.94189     |         |         |         |                                                                  |  |               |       |   |                 |                                                                  |       |           |       |       |             |       |   |           |       |   |              |                                                                                                                                                                                                                                                                                                                                                                                          |  |  |  |  |              |       |  |               |       |   |           |       |         |           |         |        |           |       |         |           |         |         |           |                                                                                                                                                                                                                                                                                                                                                                                          |         |         |         |         |  |       |         |               |         |         |           |        |   |           |         |         |           |         |   |           |         |         |           |         |   |         |         |         |  |         |   |         |         |         |       |         |         |   |         |         |  |         |         |   |         |         |  |        |         |   |         |         |  |         |         |   |         |         |       |         |         |         |   |         |  |         |         |         |   |         |  |         |         |         |   |         |  |         |        |         |   |         |       |         |        |         |         |   |  |         |         |         |         |   |  |         |         |         |         |   |  |         |         |         |         |   |                                                                                                                                                                                                                                                                                                                                                                                                                                                                                                                                                                                                                                                                                                                                                                                                                                                                                                                                                                                                                                                                                                                                                                                                                                                                                                                                                                                                                                                                                                                                                                                                                                                                                                                                                                                                                                                                                                                                                                                                                                                                                                                                                                                                                                                                                                                                                                                                     |  |  |  |  |  |           |  |  |  |  |                 |       |       |       |       |       |             |  |  |  |  |  |              |  |  |  |  |  |              |  |  |  |  |  |       |   |         |         |         |         |  |   |         |         |        |         |  |   |         |         |         |         |  |   |        |         |         |         |       |         |   |         |         |         |  |         |   |        |         |         |  |         |   |         |         |         |  |         |   |         |         |         |       |         |         |   |         |         |  |         |        |   |         |         |  |         |        |   |         |         |  |         |         |   |         |         |       |         |         |         |   |         |  |        |         |         |   |        |  |         |        |        |   |         |  |         |         |         |   |         |       |         |         |         |         |   |  |         |         |         |        |   |  |         |         |         |         |   |  |         |         |         |         |   |                                                                                                                                                                                                                                                                                                                                                                                                                                                                                                                                                                                                                                                                                                                                                                                                                                                                                                                                                                                                                                                                                                                                                                                                                                                                                                                                                                                                                                                                                                                                                                                                                                                                                                                                                                                                                                                                                                                                                                                                                                                                                                                                                                                                                                                                                                                                                                                                           |  |  |  |  |  |           |  |  |  |  |                 |       |       |       |       |       |             |  |  |  |  |  |              |  |  |  |  |  |              |  |  |  |  |  |       |   |         |         |         |         |  |   |         |         |         |         |  |   |         |         |         |         |  |   |         |         |         |         |       |         |   |         |         |         |  |         |   |         |         |         |  |         |   |         |         |         |  |         |   |         |         |         |       |         |         |   |         |        |  |         |         |   |         |         |  |         |         |   |         |         |  |         |         |   |        |         |       |         |         |         |   |         |  |         |         |         |   |         |  |         |        |         |   |         |  |         |         |         |   |         |       |         |         |         |         |   |  |         |         |         |         |   |  |         |         |         |         |   |  |         |         |         |        |   |
| Dc Aq                                                                                                                                                                                                                                                                                                                                                                                                                                                                                                                                                                                                                                                                                                                                                                                                                                                                                                                                                                                                                                                                                                                                                                                                                                                                                                                                                                                                                                                                                                                                                                                                                                                                                                                                                                                                                                                                                                                                                                                                                                                                                                                                                                                                                                                                                                                                                                                                    | C       | 422.71457     |         |         |         |                                                                  |  |               |       |   |                 |                                                                  |       |           |       |       |             |       |   |           |       |   |              |                                                                                                                                                                                                                                                                                                                                                                                          |  |  |  |  |              |       |  |               |       |   |           |       |         |           |         |        |           |       |         |           |         |         |           |                                                                                                                                                                                                                                                                                                                                                                                          |         |         |         |         |  |       |         |               |         |         |           |        |   |           |         |         |           |         |   |           |         |         |           |         |   |         |         |         |  |         |   |         |         |         |       |         |         |   |         |         |  |         |         |   |         |         |  |        |         |   |         |         |  |         |         |   |         |         |       |         |         |         |   |         |  |         |         |         |   |         |  |         |         |         |   |         |  |         |        |         |   |         |       |         |        |         |         |   |  |         |         |         |         |   |  |         |         |         |         |   |  |         |         |         |         |   |                                                                                                                                                                                                                                                                                                                                                                                                                                                                                                                                                                                                                                                                                                                                                                                                                                                                                                                                                                                                                                                                                                                                                                                                                                                                                                                                                                                                                                                                                                                                                                                                                                                                                                                                                                                                                                                                                                                                                                                                                                                                                                                                                                                                                                                                                                                                                                                                     |  |  |  |  |  |           |  |  |  |  |                 |       |       |       |       |       |             |  |  |  |  |  |              |  |  |  |  |  |              |  |  |  |  |  |       |   |         |         |         |         |  |   |         |         |        |         |  |   |         |         |         |         |  |   |        |         |         |         |       |         |   |         |         |         |  |         |   |        |         |         |  |         |   |         |         |         |  |         |   |         |         |         |       |         |         |   |         |         |  |         |        |   |         |         |  |         |        |   |         |         |  |         |         |   |         |         |       |         |         |         |   |         |  |        |         |         |   |        |  |         |        |        |   |         |  |         |         |         |   |         |       |         |         |         |         |   |  |         |         |         |        |   |  |         |         |         |         |   |  |         |         |         |         |   |                                                                                                                                                                                                                                                                                                                                                                                                                                                                                                                                                                                                                                                                                                                                                                                                                                                                                                                                                                                                                                                                                                                                                                                                                                                                                                                                                                                                                                                                                                                                                                                                                                                                                                                                                                                                                                                                                                                                                                                                                                                                                                                                                                                                                                                                                                                                                                                                           |  |  |  |  |  |           |  |  |  |  |                 |       |       |       |       |       |             |  |  |  |  |  |              |  |  |  |  |  |              |  |  |  |  |  |       |   |         |         |         |         |  |   |         |         |         |         |  |   |         |         |         |         |  |   |         |         |         |         |       |         |   |         |         |         |  |         |   |         |         |         |  |         |   |         |         |         |  |         |   |         |         |         |       |         |         |   |         |        |  |         |         |   |         |         |  |         |         |   |         |         |  |         |         |   |        |         |       |         |         |         |   |         |  |         |         |         |   |         |  |         |        |         |   |         |  |         |         |         |   |         |       |         |         |         |         |   |  |         |         |         |         |   |  |         |         |         |         |   |  |         |         |         |        |   |
| Sc FI                                                                                                                                                                                                                                                                                                                                                                                                                                                                                                                                                                                                                                                                                                                                                                                                                                                                                                                                                                                                                                                                                                                                                                                                                                                                                                                                                                                                                                                                                                                                                                                                                                                                                                                                                                                                                                                                                                                                                                                                                                                                                                                                                                                                                                                                                                                                                                                                    | D       | 350.47680     |         |         |         |                                                                  |  |               |       |   |                 |                                                                  |       |           |       |       |             |       |   |           |       |   |              |                                                                                                                                                                                                                                                                                                                                                                                          |  |  |  |  |              |       |  |               |       |   |           |       |         |           |         |        |           |       |         |           |         |         |           |                                                                                                                                                                                                                                                                                                                                                                                          |         |         |         |         |  |       |         |               |         |         |           |        |   |           |         |         |           |         |   |           |         |         |           |         |   |         |         |         |  |         |   |         |         |         |       |         |         |   |         |         |  |         |         |   |         |         |  |        |         |   |         |         |  |         |         |   |         |         |       |         |         |         |   |         |  |         |         |         |   |         |  |         |         |         |   |         |  |         |        |         |   |         |       |         |        |         |         |   |  |         |         |         |         |   |  |         |         |         |         |   |  |         |         |         |         |   |                                                                                                                                                                                                                                                                                                                                                                                                                                                                                                                                                                                                                                                                                                                                                                                                                                                                                                                                                                                                                                                                                                                                                                                                                                                                                                                                                                                                                                                                                                                                                                                                                                                                                                                                                                                                                                                                                                                                                                                                                                                                                                                                                                                                                                                                                                                                                                                                     |  |  |  |  |  |           |  |  |  |  |                 |       |       |       |       |       |             |  |  |  |  |  |              |  |  |  |  |  |              |  |  |  |  |  |       |   |         |         |         |         |  |   |         |         |        |         |  |   |         |         |         |         |  |   |        |         |         |         |       |         |   |         |         |         |  |         |   |        |         |         |  |         |   |         |         |         |  |         |   |         |         |         |       |         |         |   |         |         |  |         |        |   |         |         |  |         |        |   |         |         |  |         |         |   |         |         |       |         |         |         |   |         |  |        |         |         |   |        |  |         |        |        |   |         |  |         |         |         |   |         |       |         |         |         |         |   |  |         |         |         |        |   |  |         |         |         |         |   |  |         |         |         |         |   |                                                                                                                                                                                                                                                                                                                                                                                                                                                                                                                                                                                                                                                                                                                                                                                                                                                                                                                                                                                                                                                                                                                                                                                                                                                                                                                                                                                                                                                                                                                                                                                                                                                                                                                                                                                                                                                                                                                                                                                                                                                                                                                                                                                                                                                                                                                                                                                                           |  |  |  |  |  |           |  |  |  |  |                 |       |       |       |       |       |             |  |  |  |  |  |              |  |  |  |  |  |              |  |  |  |  |  |       |   |         |         |         |         |  |   |         |         |         |         |  |   |         |         |         |         |  |   |         |         |         |         |       |         |   |         |         |         |  |         |   |         |         |         |  |         |   |         |         |         |  |         |   |         |         |         |       |         |         |   |         |        |  |         |         |   |         |         |  |         |         |   |         |         |  |         |         |   |        |         |       |         |         |         |   |         |  |         |         |         |   |         |  |         |        |         |   |         |  |         |         |         |   |         |       |         |         |         |         |   |  |         |         |         |         |   |  |         |         |         |         |   |  |         |         |         |        |   |
| Sc Aq                                                                                                                                                                                                                                                                                                                                                                                                                                                                                                                                                                                                                                                                                                                                                                                                                                                                                                                                                                                                                                                                                                                                                                                                                                                                                                                                                                                                                                                                                                                                                                                                                                                                                                                                                                                                                                                                                                                                                                                                                                                                                                                                                                                                                                                                                                                                                                                                    | E       | 160.09321     |         |         |         |                                                                  |  |               |       |   |                 |                                                                  |       |           |       |       |             |       |   |           |       |   |              |                                                                                                                                                                                                                                                                                                                                                                                          |  |  |  |  |              |       |  |               |       |   |           |       |         |           |         |        |           |       |         |           |         |         |           |                                                                                                                                                                                                                                                                                                                                                                                          |         |         |         |         |  |       |         |               |         |         |           |        |   |           |         |         |           |         |   |           |         |         |           |         |   |         |         |         |  |         |   |         |         |         |       |         |         |   |         |         |  |         |         |   |         |         |  |        |         |   |         |         |  |         |         |   |         |         |       |         |         |         |   |         |  |         |         |         |   |         |  |         |         |         |   |         |  |         |        |         |   |         |       |         |        |         |         |   |  |         |         |         |         |   |  |         |         |         |         |   |  |         |         |         |         |   |                                                                                                                                                                                                                                                                                                                                                                                                                                                                                                                                                                                                                                                                                                                                                                                                                                                                                                                                                                                                                                                                                                                                                                                                                                                                                                                                                                                                                                                                                                                                                                                                                                                                                                                                                                                                                                                                                                                                                                                                                                                                                                                                                                                                                                                                                                                                                                                                     |  |  |  |  |  |           |  |  |  |  |                 |       |       |       |       |       |             |  |  |  |  |  |              |  |  |  |  |  |              |  |  |  |  |  |       |   |         |         |         |         |  |   |         |         |        |         |  |   |         |         |         |         |  |   |        |         |         |         |       |         |   |         |         |         |  |         |   |        |         |         |  |         |   |         |         |         |  |         |   |         |         |         |       |         |         |   |         |         |  |         |        |   |         |         |  |         |        |   |         |         |  |         |         |   |         |         |       |         |         |         |   |         |  |        |         |         |   |        |  |         |        |        |   |         |  |         |         |         |   |         |       |         |         |         |         |   |  |         |         |         |        |   |  |         |         |         |         |   |  |         |         |         |         |   |                                                                                                                                                                                                                                                                                                                                                                                                                                                                                                                                                                                                                                                                                                                                                                                                                                                                                                                                                                                                                                                                                                                                                                                                                                                                                                                                                                                                                                                                                                                                                                                                                                                                                                                                                                                                                                                                                                                                                                                                                                                                                                                                                                                                                                                                                                                                                                                                           |  |  |  |  |  |           |  |  |  |  |                 |       |       |       |       |       |             |  |  |  |  |  |              |  |  |  |  |  |              |  |  |  |  |  |       |   |         |         |         |         |  |   |         |         |         |         |  |   |         |         |         |         |  |   |         |         |         |         |       |         |   |         |         |         |  |         |   |         |         |         |  |         |   |         |         |         |  |         |   |         |         |         |       |         |         |   |         |        |  |         |         |   |         |         |  |         |         |   |         |         |  |         |         |   |        |         |       |         |         |         |   |         |  |         |         |         |   |         |  |         |        |         |   |         |  |         |         |         |   |         |       |         |         |         |         |   |  |         |         |         |         |   |  |         |         |         |         |   |  |         |         |         |        |   |
| Levels not connected by same letter are significantly different.                                                                                                                                                                                                                                                                                                                                                                                                                                                                                                                                                                                                                                                                                                                                                                                                                                                                                                                                                                                                                                                                                                                                                                                                                                                                                                                                                                                                                                                                                                                                                                                                                                                                                                                                                                                                                                                                                                                                                                                                                                                                                                                                                                                                                                                                                                                                         |         |               |         |         |         | Levels not connected by same letter are significantly different. |  |               |       |   |                 | Levels not connected by same letter are significantly different. |       |           |       |       |             |       |   |           |       |   |              |                                                                                                                                                                                                                                                                                                                                                                                          |  |  |  |  |              |       |  |               |       |   |           |       |         |           |         |        |           |       |         |           |         |         |           |                                                                                                                                                                                                                                                                                                                                                                                          |         |         |         |         |  |       |         |               |         |         |           |        |   |           |         |         |           |         |   |           |         |         |           |         |   |         |         |         |  |         |   |         |         |         |       |         |         |   |         |         |  |         |         |   |         |         |  |        |         |   |         |         |  |         |         |   |         |         |       |         |         |         |   |         |  |         |         |         |   |         |  |         |         |         |   |         |  |         |        |         |   |         |       |         |        |         |         |   |  |         |         |         |         |   |  |         |         |         |         |   |  |         |         |         |         |   |                                                                                                                                                                                                                                                                                                                                                                                                                                                                                                                                                                                                                                                                                                                                                                                                                                                                                                                                                                                                                                                                                                                                                                                                                                                                                                                                                                                                                                                                                                                                                                                                                                                                                                                                                                                                                                                                                                                                                                                                                                                                                                                                                                                                                                                                                                                                                                                                     |  |  |  |  |  |           |  |  |  |  |                 |       |       |       |       |       |             |  |  |  |  |  |              |  |  |  |  |  |              |  |  |  |  |  |       |   |         |         |         |         |  |   |         |         |        |         |  |   |         |         |         |         |  |   |        |         |         |         |       |         |   |         |         |         |  |         |   |        |         |         |  |         |   |         |         |         |  |         |   |         |         |         |       |         |         |   |         |         |  |         |        |   |         |         |  |         |        |   |         |         |  |         |         |   |         |         |       |         |         |         |   |         |  |        |         |         |   |        |  |         |        |        |   |         |  |         |         |         |   |         |       |         |         |         |         |   |  |         |         |         |        |   |  |         |         |         |         |   |  |         |         |         |         |   |                                                                                                                                                                                                                                                                                                                                                                                                                                                                                                                                                                                                                                                                                                                                                                                                                                                                                                                                                                                                                                                                                                                                                                                                                                                                                                                                                                                                                                                                                                                                                                                                                                                                                                                                                                                                                                                                                                                                                                                                                                                                                                                                                                                                                                                                                                                                                                                                           |  |  |  |  |  |           |  |  |  |  |                 |       |       |       |       |       |             |  |  |  |  |  |              |  |  |  |  |  |              |  |  |  |  |  |       |   |         |         |         |         |  |   |         |         |         |         |  |   |         |         |         |         |  |   |         |         |         |         |       |         |   |         |         |         |  |         |   |         |         |         |  |         |   |         |         |         |  |         |   |         |         |         |       |         |         |   |         |        |  |         |         |   |         |         |  |         |         |   |         |         |  |         |         |   |        |         |       |         |         |         |   |         |  |         |         |         |   |         |  |         |        |         |   |         |  |         |         |         |   |         |       |         |         |         |         |   |  |         |         |         |         |   |  |         |         |         |         |   |  |         |         |         |        |   |

### **SI.5: Volumetric characterization of the metering system by a gravimetric method**

The results of the gravimetric characterization of the volumetric performance are listed in Table SI.4. This is the summary of the results as depicted in Figure 5 and 6 of the main manuscript. Concerning the system accuracy, a slight increase in offset with the 10  $\mu\text{L}$  target volume is observed for higher Hct levels (5.2% for 70% Hct level). However, when the offset of the average measured volumes for each Hct level is compared to the global average overall Hct levels (9.65  $\mu\text{L}$ , which was plotted as the full red line in Figure 6), these differences reduce below 2%.

*Table SI.4: Gravimetric measurements of the metering system its volumetric performance for different target volumes and varying Hct levels of blood samples.*

| Hct level (%) | Target volume ( $\mu\text{L}$ ) | Average volume ( $\mu\text{L}$ ) | SD   | CV (%) |
|---------------|---------------------------------|----------------------------------|------|--------|
| 25            | 10                              | 9.72                             | 0.23 | 2.37   |
|               | 5                               | 4.86                             | 0.15 | 2.99   |
| 40            | 10                              | 9.79                             | 0.22 | 2.22   |
|               | 15                              | 14.56                            | 0.24 | 1.62   |
| 55            | 10                              | 9.59                             | 0.21 | 2.19   |
| 70            | 10                              | 9.48                             | 0.24 | 2.58   |

Although these results are highly promising, the volumetric performance could be further improved by i) replacing manual chip assembly and coating steps with an automated manufacturing process (i.e. roll-to-roll assembly and spray coating), ii) reducing the roughness of the channel walls by shifting to  $\text{CO}_2$  laser cutting and iii) accounting for the volume loss and correcting by adjusting the location of the HBV within the metering channel.

### **SI.6: Multilayer configuration of SIMPLE-DBS sampling device, DBS loading, drying and removal**

The multilayer configuration of the integrated SIMPLE-DBS device is illustrated in the cross-sections of Figure SI.5. A CF12 DBS paper is positioned underneath the distant part (after the dc HBV) of the metering channel which are in connection with each other via a sample loading hole. The top side of the metering channel is also foreseen with a hole at the same position of the sample loading hole. This punching hole is used for removing the dried DBS paper out of the chip before analysis by means of a pipet tip. During the sampling process, this hole is sealed with a removable film to prevent the intake of air. Likewise, a second removable film is attached to the bottom of the DBS paper. The metering system is in connection, via the DBS paper, with the bottom microfluidic layer in which the SIMPLE pumping mechanism is present which acts as the passive negative pressure source. In order to prevent the pulling of loaded blood sample out of the DBS paper in the connected microfluidic channel, a hydrophobic stop valve (HSV) is situated right next to the DBS paper.

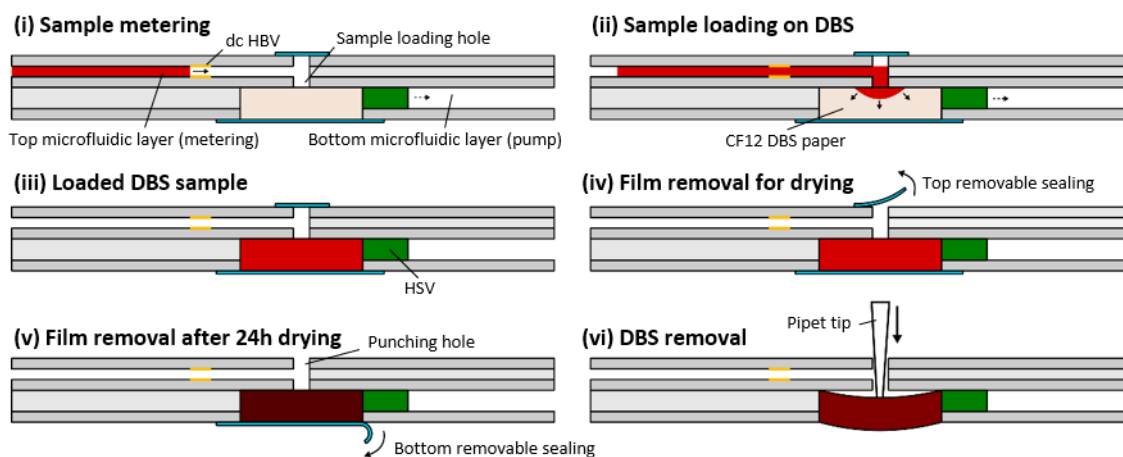

Figure SI.5: Cross-sections of the SIMPLE-DBS device illustrating the (i-iii) loading of the metered blood sample on the CF12 DBS paper, (iv) removal of the top sealing for a 24 h drying step and (v,vi) finally after peeling off the bottom sealing tape the DBS paper is pushed out of the chip by means of a regular pipet tip.

### SI.7: ELISA measurements on extracted DBS samples

Table SI.5: Overview table of ELISA measurements on extracted DBS samples

| DBS sample type                                                           | ADM conc. [ $\mu\text{g/mL}$ ] | Loaded sample volume [ $\mu\text{L}$ ] | ADM [ $\mu\text{g/mL}$ ] | Stdev [ $\mu\text{g/mL}$ ] | %CV | ADM <sub>Measured</sub> / ADM <sub>theor</sub> conc. [%] |
|---------------------------------------------------------------------------|--------------------------------|----------------------------------------|--------------------------|----------------------------|-----|----------------------------------------------------------|
| Whatman protein saver card - 6 mm sub-punch (gold standard)               | 0                              | 40                                     | 0.26                     | 0.02                       |     |                                                          |
|                                                                           | 1                              | 40                                     | 0.70                     | 0.11                       | 15% | 70%                                                      |
|                                                                           | 4                              | 40                                     | 2.67                     | 0.67                       | 25% | 67%                                                      |
|                                                                           | 16                             | 40                                     | 7.69                     | 0.23                       | 3%  | 48%                                                      |
| AVERAGE:                                                                  |                                |                                        |                          |                            | 15% | 62%                                                      |
| SIMPLE-DBS                                                                | 0                              | 9.65                                   | <0.03                    | <0.03                      |     |                                                          |
|                                                                           | 1                              | 9.65                                   | 0.94                     | 0.08                       | 8%  | 94%                                                      |
|                                                                           | 4                              | 9.65                                   | 3.28                     | 0.27                       | 8%  | 82%                                                      |
|                                                                           | 16                             | 9.65                                   | 12.95                    | 2.15                       | 17% | 81%                                                      |
| AVERAGE:                                                                  |                                |                                        |                          |                            | 11% | 86%                                                      |
| Whatman protein saver card - no sub-punch (whole spot analysis reference) | 0                              | 10                                     | <0.03                    | <0.03                      |     |                                                          |
|                                                                           | 1                              | 10                                     | 0.77                     | 0.05                       | 7%  | 77%                                                      |
|                                                                           | 4                              | 10                                     | 3.10                     | 0.50                       | 16% | 78%                                                      |
|                                                                           | 16                             | 10                                     | 12.71                    | 2.19                       | 17% | 79%                                                      |
| AVERAGE:                                                                  |                                |                                        |                          |                            | 13% | 78%                                                      |

### SI.8: List of supplementary videos:

[Video SI.1 – Working principle of the single metering system](#)

[Video SI.2 – Methodology of the gravimetric measurements](#)

[Video SI.3 – Working principle of the parallel metering system](#)

[Video SI.4 – Flow behaviour in the integrated SIMPLE-DBS system](#)
